# Supplementary material for: Novel loci for childhood body mass index and shared heritability with adult cardiometabolic traits
Source: PLoS Genet. 2020 Oct 12;16(10):e1008718. doi: 10.1371/journal.pgen.1008718 (PMC7581004; doi:10.1371/journal.pgen.1008718)
Supplement: S4 Table — (XLSX) [file pgen.1008718.s004.xlsx]

## Sheet: S4 Table
S4 Table Results of the discovery analysis for all SNPs with P-values <5 x 10-6
SNPs for which information was available in less than 50% of the studies and less than 50% of the total sample size were included
													CHR: Chromosome; EA: Effect Allele; SE: Standard Error
SNP	CHR	Position	Effect allele	Non effect allele	EAF	Beta	SE	P-value	Direction	Heterogeneity P-value	TotalSampleSize
rs939584	2	621558	t	c	0.8316	0.1066	0.0102	8.852e-26	++++++++++++++++++++-?++?+++	0.2505	38668
rs6752470	2	629694	a	t	0.8335	0.1065	0.0102	1.67e-25	++++++++++++++++++++-?++?+++	0.2593	38668
rs62105304	2	632925	a	g	0.1684	-0.1061	0.0102	2.361e-25	--------------------+?--?---	0.2386	38668
rs7579971	2	631603	t	c	0.8338	0.1062	0.0102	2.48e-25	++++++++++++++++++++-?++?+++	0.2769	38668
rs4854344	2	638144	t	g	0.8331	0.1042	0.0101	3.793e-25	+-++++++++++++++++++-?++?+++	0.2428	38769
rs10166979	2	640701	a	g	0.167	-0.1055	0.0102	3.936e-25	-+------------------+?--?---	0.2144	38668
rs73139123	2	630075	t	c	0.8308	0.1053	0.0102	4.176e-25	++++++++++++++++++++-?++?+++	0.3808	38668
rs6711012	2	624034	c	g	0.8324	0.1038	0.0101	5.23e-25	++++++++++++++++++++--++++++	0.1828	39618
rs6711039	2	624084	a	g	0.8324	0.1038	0.0101	5.245e-25	++++++++++++++++++++--++++++	0.1827	39618
rs939582	2	622723	a	g	0.1677	-0.1038	0.01	5.3e-25	--------------------++------	0.1786	39618
rs1320330	2	622225	t	g	0.1677	-0.1038	0.0101	5.427e-25	--------------------++------	0.1788	39618
rs5017301	2	631096	a	g	0.8285	0.1038	0.0101	5.47e-25	+-++++0+++++++++++++--++++++	0.1882	39618
rs6717005	2	621910	a	c	0.1677	-0.1038	0.0101	5.571e-25	--------------------++------	0.1801	39618
rs1320332	2	621954	t	c	0.1677	-0.1037	0.0101	5.759e-25	--------------------++------	0.1787	39618
rs6711254	2	624210	a	g	0.8326	0.1037	0.0101	6.44e-25	++++++++++++++++++++--++++++	0.1801	39618
rs13387939	2	637498	a	c	0.8331	0.1038	0.0101	7.11e-25	++++++++++++++++++++--++++++	0.2341	39618
rs6735049	2	630569	t	c	0.1673	-0.1038	0.0101	7.225e-25	--------------------++------	0.2387	39618
rs6725686	2	630436	a	c	0.8329	0.1037	0.0101	7.53e-25	++++++++++++++++++++--++++++	0.236	39618
rs12997450	2	630113	t	c	0.8328	0.1037	0.0101	7.694e-25	++++++++++++++++++++--++++++	0.2323	39618
rs13007086	2	630034	a	t	0.1672	-0.1037	0.0101	7.726e-25	--------------------++------	0.2309	39618
rs6751993	2	635864	a	g	0.1677	-0.1036	0.0101	8.447e-25	--------------------++------	0.2586	39618
rs12995480	2	629881	t	c	0.1674	-0.1036	0.0101	8.975e-25	--------------------++------	0.2176	39618
rs6732471	2	629914	a	g	0.8328	0.1035	0.0101	9.008e-25	++++++++++++++++++++--++++++	0.2294	39618
rs12995666	2	629959	t	c	0.1672	-0.1035	0.0101	9.104e-25	--------------------++------	0.2308	39618
rs12463617	2	629244	a	c	0.1685	-0.1036	0.0101	9.284e-25	-+------------------++------	0.186	39618
rs2867115	2	651382	t	c	0.8351	0.1051	0.0102	9.556e-25	+-++++++++++++++++++--++++++	0.1779	39618
rs13386964	2	650828	a	g	0.1679	-0.1033	0.0101	9.794e-25	-+------------------++------	0.1848	39618
rs4854346	2	638918	a	c	0.1669	-0.1033	0.0101	1.019e-24	--------------------++------	0.2359	39618
rs7569210	2	631462	a	g	0.833	0.1035	0.0101	1.049e-24	++++++++++++++++++++--++++++	0.2449	39618
rs10865548	2	631606	a	g	0.167	-0.1035	0.0101	1.053e-24	--------------------++------	0.2455	39618
rs7569102	2	631335	t	g	0.833	0.1035	0.0101	1.056e-24	++++++++++++++++++++--++++++	0.2441	39618
rs7588007	2	631255	t	c	0.167	-0.1035	0.0101	1.056e-24	--------------------++------	0.2438	39618
rs7561556	2	638560	t	c	0.1671	-0.1032	0.0101	1.129e-24	--------------------++------	0.2417	39618
rs2867125	2	622827	t	c	0.1672	-0.1065	0.0104	1.241e-24	-?-??-----?-?-------+?--?---	0.2758	36118
rs1320337	2	649867	a	t	0.8319	0.1031	0.0101	1.277e-24	+-++++++++++++++++++--++++++	0.1828	396178
rs12623218	2	632146	a	t	0.8328	0.1032	0.0101	1.401e-24	++++++++++++++++++++--++++++	0.2609	39618
rs12993295	2	632808	t	g	0.8328	0.1032	0.0101	1.474e-24	++++++++++++++++++++--++++++	0.2357	39618
rs66906321	2	630070	t	c	0.1773	-0.1025	0.01	1.507e-24	--------------------++------	0.3043	39618
rs34119520	2	632760	t	c	0.1671	-0.1032	0.0101	1.568e-24	--------------------++------	0.2349	39618
rs7606023	2	638566	c	g	0.1666	-0.1029	0.0101	1.592e-24	--------------------++------	0.2314	39618
rs7564708	2	639055	t	c	0.1674	-0.1028	0.0101	1.668e-24	--------------------++------	0.2174	39618
rs7558910	2	645122	c	g	0.1679	-0.1028	0.0101	1.695e-24	-+------------------++------	0.1809	39618
rs4854347	2	641159	a	c	0.1678	-0.1028	0.0101	1.724e-24	-+------------------++------	0.1884	39618
rs7571967	2	646839	t	g	0.1716	-0.1023	0.01	1.758e-24	-+------------------++------	0.2168	39618
rs7579427	2	631183	a	c	0.8323	0.1029	0.0101	1.851e-24	++++++++++++++++++++--++++++	0.2563	39618
rs7601028	2	642499	c	g	0.1678	-0.1027	0.0101	1.87e-24	-+------------------++------	0.1823	39618
rs13012571	2	632550	t	c	0.8303	0.1028	0.0101	1.872e-24	++++++++++++++++++++--++++++	0.314	39618
rs7608050	2	652247	a	g	0.1682	-0.1031	0.0101	1.953e-24	-+------------------++------	0.1719	39618
rs6760274	2	652272	a	g	0.1665	-0.1032	0.0101	2.043e-24	--------------------++------	0.2103	39618
rs13022164	2	632536	a	g	0.1688	-0.1024	0.0101	2.836e-24	--------------------++------	0.3142	39618
rs13386517	2	650479	c	g	0.1673	-0.1046	0.0103	3.043e-24	-+-------------?-?--+?--?---	0.1987	37743
rs7604609	2	643303	c	g	0.1667	-0.1024	0.0101	3.657e-24	-+------------------++------	0.1858	39618
rs7591067	2	642846	a	g	0.8327	0.1042	0.0103	4.36e-24	+-+++++++++++++?+?++-?++?+++	0.1919	37743
rs4854348	2	647760	a	g	0.1707	-0.1017	0.0101	4.582e-24	-+------------------++------	0.1444	39618
rs10865551	2	641863	a	t	0.8327	0.104	0.0103	5.573e-24	+-+++++++++++++?+?++-?++?+++	0.1959	37743
rs35796073	2	636819	a	c	0.167	-0.1026	0.0102	7.998e-24	---------------?-?--++------	0.205	38693
rs62105303	2	632922	a	g	0.8286	0.1034	0.0103	1.083e-23	+++++++++++++++?+?++-?++?+++	0.2544	37743
rs6751994	2	635866	a	g	0.1671	-0.1021	0.0102	1.249e-23	---------------?-?--++------	0.2495	38693
rs7560246	2	643469	t	c	0.1666	-0.1019	0.0102	1.328e-23	-+---------------?--++------	0.1571	39067
rs12714414	2	651407	t	c	0.8342	0.1031	0.0103	1.392e-23	+-+++++++++++++?+?++--++++++	0.1499	38693
rs7570198	2	648198	t	c	0.8273	0.1002	0.01	1.414e-23	+-++++++++++++++++++--++++++	0.2046	39618
rs13391851	2	642467	a	g	0.1668	-0.1015	0.0102	1.948e-23	---------------?-?--++------	0.211	38692.9
rs7571957	2	646803	t	c	0.1678	-0.1014	0.0102	1.991e-23	-+-------------?-?--++------	0.179	38693.1
rs62105327	2	639060	a	t	0.8247	0.0996	0.01	2.074e-23	++++++++++++++++++++--++++++	0.239	39617.9
rs13388043	2	637597	t	c	0.8322	0.1015	0.0102	2.076e-23	+++++++++++++++?+?++--++++++	0.2474	38693
rs10189761	2	646364	a	t	0.8319	0.1013	0.0102	2.185e-23	+-+++++++++++++?+?++--++++++	0.1687	38692.9
rs10172769	2	646345	a	g	0.8319	0.1013	0.0102	2.187e-23	+-+++++++++++++?+?++--++++++	0.1687	38692.9
rs13387091	2	650980	a	g	0.1668	-0.1016	0.0102	2.237e-23	---------------?-?--++------	0.1868	38693
rs11127487	2	639900	t	c	0.832	0.1013	0.0102	2.337e-23	+-+++++++++++++?+?++--++++++	0.1732	38693
rs10169736	2	641082	a	t	0.168	-0.1013	0.0102	2.348e-23	-+-------------?-?--++------	0.1735	38693
rs7561317	2	644953	a	g	0.169	-0.1031	0.0104	2.542e-23	-?-??-------?--?-?--++------	0.1878	36303
rs4429506	2	652576	a	c	0.8273	0.0999	0.0101	3.477e-23	+-++++++++++++++++++--++++++	0.2031	39618.1
rs4854342	2	634476	c	g	0.8144	0.0987	0.01	3.505e-23	++++++++++++++++++++--++++++	0.4913	39618
rs10192350	2	652607	t	c	0.8321	0.1014	0.0102	4.09e-23	+-+++++++++++++?+?++--++++++	0.175	38693
rs2860323	2	614210	a	g	0.1679	-0.0999	0.0101	4.35e-23	------------+--------+------	0.2612	39618
rs4854343	2	638107	a	g	0.8326	0.1005	0.0102	4.648e-23	+++++++++++++++?+?++--++++++	0.1915	38692.9
rs7574359	2	652542	t	c	0.832	0.1013	0.0102	4.788e-23	+-+++++++++++++?+?++--++++++	0.1662	38693
rs2947411	2	614168	a	g	0.173	-0.1025	0.0104	4.977e-23	-?-??-----?-?-------++------	0.2564	36963
rs939581	2	623224	t	c	0.8324	0.1021	0.0104	8.395e-23	++++++++++++++++++++-??+?+++	0.4499	37035.1
rs4854340	2	623216	a	g	0.8324	0.1021	0.0104	8.473e-23	++++++++++++++++++++-??+?+++	0.4503	37035.1
rs11127484	2	623798	t	c	0.1668	-0.102	0.0104	9.257e-23	--------------------+??-?---	0.4838	37035
rs13028252	2	632529	t	c	0.17	-0.0999	0.0102	9.358e-23	---------------?-?--++------	0.3137	38693.1
rs4854339	2	623212	t	c	0.1677	-0.1019	0.0104	9.863e-23	--------------------+??-?---	0.4418	37035
rs13396935	2	653195	a	g	0.1678	-0.1008	0.0103	1.021e-22	-+-------------?-?--++------	0.1977	38693
rs6756518	2	651483	a	g	0.1583	-0.1047	0.0107	1.054e-22	-+----+--------?-?-+++------	0.09904	38693
rs7576635	2	625057	t	c	0.8335	0.102	0.0104	1.068e-22	++++++++++++++++++++-??+?+++	0.4556	37035
rs6719883	2	651482	t	g	0.8417	0.1047	0.0107	1.09e-22	+-++++-++++++++?+?+---++++++	0.09887	38693
rs7576624	2	625029	t	c	0.8335	0.1019	0.0104	1.094e-22	++++++++++++++++++++-??+?+++	0.4562	37035
rs11127483	2	623691	a	g	0.8335	0.1019	0.0104	1.097e-22	++++++++++++++++++++-??+?+++	0.4605	37035
rs11687052	2	623740	a	g	0.1665	-0.1018	0.0104	1.145e-22	--------------------+??-?---	0.4621	37035
rs2867122	2	624581	a	c	0.1666	-0.1018	0.0104	1.234e-22	--------------------+??-?---	0.4657	37035
rs6760543	2	622388	c	g	0.8335	0.1017	0.0104	1.235e-22	++++++++++++++++++++-??+?+++	0.4569	37035
rs6728726	2	623976	t	c	0.1665	-0.1018	0.0104	1.236e-22	--------------------+??-?---	0.4646	37035
rs6548237	2	621461	a	c	0.1661	-0.1022	0.0104	1.246e-22	--------------------+??-?---	0.4862	37035.1
rs1320331	2	622161	c	g	0.8335	0.1017	0.0104	1.26e-22	++++++++++++++++++++-??+?+++	0.4583	37035
rs939583	2	622531	t	c	0.8337	0.1017	0.0104	1.337e-22	++++++++++++++++++++-??+?+++	0.4615	37035
rs2867124	2	622857	a	g	0.1666	-0.1014	0.0104	1.608e-22	--------------------+??-?---	0.4306	37035
rs6744646	2	628504	a	g	0.1679	-0.1014	0.0104	1.988e-22	--------------------+??-?---	0.4359	37035
rs6743060	2	629510	a	c	0.8339	0.1015	0.0104	2.02e-22	++++++++++++++++++++-??+?+++	0.4887	37034.9
rs6748821	2	629601	a	g	0.1661	-0.1015	0.0104	2.109e-22	--------------------+??-?---	0.4883	37034.9
rs6731688	2	630662	a	c	0.1659	-0.1015	0.0104	2.155e-22	--------------------+??-?---	0.5048	37034.9
rs6731225	2	630224	a	t	0.1666	-0.1014	0.0104	2.192e-22	--------------------+??-?---	0.4792	37035
rs6725549	2	630323	a	c	0.834	0.1014	0.0104	2.294e-22	++++++++++++++++++++-??+?+++	0.4946	37035
rs6755502	2	635721	t	c	0.1659	-0.1014	0.0104	2.306e-22	--------------------+??-?---	0.5523	37035.1
rs6752706	2	629831	t	c	0.1684	-0.101	0.0104	2.385e-22	--------------------+??-?---	0.4237	37034.9
rs13007080	2	630024	a	c	0.166	-0.1013	0.0104	2.494e-22	--------------------+??-?---	0.4783	37035
rs6739303	2	628749	t	c	0.8306	0.1011	0.0104	2.544e-22	++++++++++++++++++++-??+?+++	0.4298	37035.1
rs5017300	2	631099	c	g	0.1701	-0.1011	0.0104	2.558e-22	-+----0-------------+??-?---	0.4208	37035
rs6735024	2	630509	t	c	0.1673	-0.1012	0.0104	2.676e-22	--------------------+??-?---	0.4791	37035
rs7564711	2	639061	t	g	0.1757	-0.0981	0.0101	2.705e-22	---------------?-?--++------	0.227	38692.9
rs7570232	2	621185	t	c	0.1671	-0.101	0.0104	2.878e-22	--------------------+??-?---	0.5234	37034.9
rs2867110	2	651105	c	g	0.1667	-0.101	0.0104	3.218e-22	-+------------------+??-?---	0.4472	37034.9
rs6731348	2	630339	a	c	0.1673	-0.101	0.0104	3.272e-22	-+------------------+??-?---	0.4443	37035
rs6749375	2	636017	t	c	0.8343	0.1011	0.0104	3.371e-22	++++++++++++++++++++-??+?+++	0.5411	37034.9
rs7585056	2	631528	a	g	0.1657	-0.1012	0.0104	3.378e-22	--------------------+??-?---	0.515	37035.1
rs11127485	2	632028	t	c	0.8342	0.101	0.0104	3.58e-22	++++++++++++++++++++-??+?+++	0.5088	37035
rs1320336	2	650012	a	g	0.1667	-0.1008	0.0104	3.716e-22	-+------------------+??-?---	0.4607	37034.9
rs13021737	2	632348	a	g	0.166	-0.1009	0.0104	4.269e-22	--------------------+??-?---	0.5429	37035.1
rs13027828	2	632379	t	g	0.166	-0.1009	0.0104	4.273e-22	--------------------+??-?---	0.5382	37035
rs35802221	2	632904	a	g	0.1678	-0.1007	0.0104	4.475e-22	--------------------+??-?---	0.4579	37035
rs6734363	2	635200	a	g	0.8343	0.1008	0.0104	4.7e-22	++++++++++++++++++++-??+?+++	0.5299	37035
rs2867114	2	651380	t	c	0.1634	-0.1023	0.0106	5.142e-22	-+------------------+??-?---	0.3802	37034.9
rs7567710	2	645372	t	g	0.1667	-0.1003	0.0104	5.834e-22	-+------------------+??-?---	0.4592	37034.9
rs7559018	2	645203	t	c	0.8333	0.1003	0.0104	5.863e-22	+-++++++++++++++++++-??+?+++	0.459	37034.9
rs5017303	2	630995	t	g	0.17	-0.1003	0.0104	5.931e-22	-+------------------+??-?---	0.4258	37035
rs2867105	2	601905	t	g	0.1729	-0.0949	0.0099	6.641e-22	-+------------------++------	0.4533	39725
rs13022337	2	632609	a	g	0.1672	-0.1004	0.0105	9.111e-22	--------------------+??-?---	0.5242	37035.1
rs10193244	2	647580	t	c	0.1696	-0.0995	0.0104	1.143e-21	-+------------------+??-?---	0.3587	37035
rs4854349	2	647861	t	c	0.1696	-0.0994	0.0104	1.239e-21	-+------------------+??-?---	0.382	37035
rs13412194	2	653245	a	c	0.8338	0.1006	0.0105	1.297e-21	+-++++++++++++++++++-??+?+++	0.5189	37035
rs7560127	2	643315	t	c	0.1653	-0.0998	0.0105	1.374e-21	-+------------------+??-?---	0.4739	37035
rs2867123	2	624524	c	g	0.8333	0.1002	0.0105	1.486e-21	+++++++++++++++?+?++-??+?+++	0.4626	36110
rs12476198	2	625347	t	c	0.1664	-0.1002	0.0105	1.622e-21	---------------?-?--+??-?---	0.4476	36110
rs6719518	2	623935	t	c	0.8334	0.1001	0.0105	1.71e-21	+++++++++++++++?+?++-??+?+++	0.4542	36110
rs2903492	2	624678	a	g	0.8333	0.1	0.0105	1.853e-21	+++++++++++++++?+?++-??+?+++	0.4486	36110
rs13397165	2	653354	a	g	0.1663	-0.1002	0.0105	1.867e-21	-+------------------+??-?---	0.5249	37035
rs2867112	2	651349	t	g	0.8354	0.1012	0.0107	2.113e-21	+-+++++++++++++?+?++-??+?+++	0.3947	36110
rs13412197	2	653250	a	g	0.8334	0.0999	0.0105	2.2e-21	+-++++++++++++++++++-??+?+++	0.5038	37035
rs2867113	2	651365	a	g	0.1639	-0.1015	0.0107	2.3e-21	-+-------------?-?--+??-?---	0.4124	36110
rs12714415	2	651430	t	c	0.8353	0.1014	0.0107	2.318e-21	+-+++++++++++++?+?++-??+?+++	0.4168	36109.9
rs11676272	2	25141538	a	g	0.5368	-0.075	0.0079	2.373e-21	---??--++---?--------?--?---	0.5425	36714
rs10188334	2	653874	t	c	0.1661	-0.1001	0.0106	2.7e-21	-+------------------+??-?---	0.531	37034.9
rs35142762	2	636790	t	c	0.8342	0.1	0.0106	2.788e-21	+++++++++++++++?+?++-??+?+++	0.4827	36109.9
rs6744653	2	628524	a	g	0.1682	-0.0996	0.0105	2.94e-21	---------------?-?--+??-?---	0.4163	36110
rs7567570	2	615140	t	c	0.167	-0.0984	0.0104	3.268e-21	---------------------??-?---	0.5717	37035
rs13396119	2	637508	t	c	0.1658	-0.0998	0.0106	3.308e-21	---------------?-?--+??-?---	0.5081	36110
rs7559547	2	615627	t	c	0.8291	0.098	0.0104	3.391e-21	+-++++++++++++++++++-??+?+++	0.4701	37035
rs6746275	2	635857	a	c	0.8342	0.0996	0.0106	3.98e-21	+++++++++++++++?+?++-??+?+++	0.5385	36109.9
rs2903490	2	651290	a	g	0.8334	0.0995	0.0105	4.014e-21	+-+++++++++++++?+?++-??+?+++	0.4216	36109.9
rs2867111	2	651286	a	c	0.8334	0.0995	0.0105	4.022e-21	+-+++++++++++++?+?++-??+?+++	0.4217	36109.9
rs2867109	2	651030	t	g	0.8331	0.0993	0.0105	4.203e-21	+-+++++++++++++?+?++-??+?+++	0.4337	36110
rs10865549	2	631759	a	g	0.834	0.0995	0.0106	4.255e-21	+++++++++++++++?+?++-??+?+++	0.5045	36110
rs11127486	2	632101	t	c	0.834	0.0995	0.0106	4.268e-21	+++++++++++++++?+?++-??+?+++	0.5054	36110
rs4613321	2	650647	a	g	0.8331	0.0991	0.0105	4.799e-21	+-+++++++++++++?+?++-??+?+++	0.4498	36110
rs13386627	2	650560	c	g	0.1669	-0.0991	0.0105	4.81e-21	-+-------------?-?--+??-?---	0.4498	36109.9
rs13401686	2	650519	a	g	0.8331	0.0991	0.0105	4.839e-21	+-+++++++++++++?+?++-??+?+++	0.4498	36109.9
rs2867108	2	650143	t	c	0.8331	0.0991	0.0105	4.897e-21	+-+++++++++++++?+?++-??+?+++	0.4499	36109.9
rs1320338	2	649347	t	g	0.8331	0.0991	0.0105	5.046e-21	+-+++++++++++++?+?++-??+?+++	0.45	36110
rs4452188	2	648810	a	g	0.8331	0.0991	0.0105	5.154e-21	+-+++++++++++++?+?++-??+?+++	0.45	36109.9
rs12992154	2	632300	t	g	0.8338	0.0992	0.0106	5.648e-21	+++++++++++++++?+?++-??+?+++	0.5305	36110
rs6749422	2	25150011	c	g	0.5376	-0.0721	0.0077	5.774e-21	-------++---+--------?--?---	0.1458	38667.9
rs10182181	2	25150296	a	g	0.5378	-0.0703	0.0075	5.872e-21	-------+----+-----------+---	0.1648	39721
rs6548239	2	635154	a	g	0.8341	0.0991	0.0106	6.179e-21	+++++++++++++++?+?++-??+?+++	0.5217	36110
rs6719980	2	651507	t	c	0.8329	0.099	0.0106	6.473e-21	+-+++++++++++++?+?++-??+?+++	0.4118	36110
rs13393304	2	637830	a	g	0.1656	-0.0988	0.0105	6.693e-21	---------------?-?--+??-?---	0.5075	36110
rs10173167	2	646767	a	g	0.8331	0.0988	0.0105	6.699e-21	+-+++++++++++++?+?++-??+?+++	0.4459	36110
rs10190052	2	646674	t	c	0.1669	-0.0987	0.0105	6.798e-21	-+-------------?-?--+??-?---	0.446	36109.9
rs4854345	2	638190	a	g	0.1655	-0.0988	0.0105	7.12e-21	---------------?-?--+??-?---	0.5054	36110
rs6752378	2	25150116	a	c	0.4621	0.0701	0.0075	7.49e-21	+++++++--+++-+++++++++++-+++	0.1515	39724
rs11127488	2	646061	t	c	0.1669	-0.0986	0.0105	7.548e-21	-+-------------?-?--+??-?---	0.4496	36109.9
rs11127490	2	646110	t	c	0.8331	0.0986	0.0105	7.562e-21	+-+++++++++++++?+?++-??+?+++	0.4499	36109.9
rs11127489	2	646081	t	c	0.8331	0.0986	0.0105	7.574e-21	+-+++++++++++++?+?++-??+?+++	0.4499	36109.9
rs7559447	2	645646	t	c	0.8331	0.0986	0.0105	7.618e-21	+-+++++++++++++?+?++-??+?+++	0.4496	36109.9
rs7567368	2	645082	t	c	0.1669	-0.0986	0.0105	7.733e-21	-+-------------?-?--+??-?---	0.4491	36109.9
rs13387090	2	650974	t	g	0.1458	-0.1032	0.011	8.16e-21	-+----+------------+++------	0.1105	39618.1
rs11127491	2	646145	t	c	0.1665	-0.0988	0.0106	8.353e-21	-+-------------?-?--+??-?---	0.4433	36110
rs12714413	2	642253	t	c	0.1669	-0.0985	0.0105	8.707e-21	-+-------------?-?--+??-?---	0.4498	36109.9
rs10865550	2	641718	t	g	0.1669	-0.0985	0.0105	8.718e-21	-+-------------?-?--+??-?---	0.4498	36110
rs10185143	2	25150758	t	c	0.537	-0.071	0.0076	9.483e-21	-------+----+-----------+---	0.1322	39618
rs6731872	2	624205	t	g	0.1677	-0.0983	0.0105	9.581e-21	---------------?-?--+??-?---	0.52	36110
rs2903489	2	649638	t	c	0.169	-0.0983	0.0105	9.905e-21	-+-------------?-?--+??-?---	0.4755	36110
rs713586	2	25158008	t	c	0.5321	-0.0744	0.008	1.141e-20	-?-??--+--?-?--------?--?---	0.4975	36013
rs4423631	2	648758	t	c	0.1685	-0.0979	0.0105	1.147e-20	-+-------------?-?--+??-?---	0.5559	36110
rs10182458	2	25150641	a	g	0.5383	-0.0709	0.0076	1.155e-20	-------+----+-----------+---	0.1614	39618
rs35628463	2	653581	a	g	0.1668	-0.0993	0.0107	1.28e-20	-+-------------?-?--+??-?---	0.4908	36109.9
rs13013021	2	632723	t	c	0.8351	0.0987	0.0106	1.301e-20	+++++++++++++++?+?++-??+?+++	0.5002	36110.1
rs6548240	2	636929	a	c	0.8305	0.0982	0.0105	1.329e-20	+++++++++++++++?+?++-??+?+++	0.471	36110
rs7570993	2	652565	a	g	0.8334	0.0987	0.0106	1.402e-20	+-+++++++++++++?+?++-??+?+++	0.4645	36110
rs35913461	2	653575	t	c	0.1663	-0.0991	0.0107	1.59e-20	-+-------------?-?--+??-?---	0.4916	36109.9
rs7604752	2	643428	a	c	0.8343	0.0982	0.0106	1.645e-20	+-+++++++++++++?+?++-??+?+++	0.4637	36110.1
rs13028310	2	632591	t	c	0.2027	-0.0933	0.01	1.661e-20	----------------?--+--------	0.3911	38159.9
rs10190313	2	647577	a	g	0.1698	-0.0975	0.0105	1.875e-20	-+-------------?-?--+??-?---	0.3885	36110
rs13415094	2	653093	t	c	0.8334	0.0983	0.0106	2.463e-20	+-+++++++++++++?+?++-??+?+++	0.5036	36110
rs7594220	2	643320	a	g	0.8304	0.0971	0.0105	2.703e-20	+-+++++++++++++?+?++-??+?+++	0.5264	36110
rs2384054	2	25156773	t	c	0.5327	-0.0697	0.0076	4.045e-20	-------+----+-----------+---	0.1886	39618
rs6548238	2	634905	t	c	0.1669	-0.1005	0.011	4.323e-20	-?-??-----?-?--?-?--+??-?---	0.4303	33455
rs713587	2	25158281	t	c	0.4655	0.0695	0.0076	4.437e-20	+++++++-++++-++++++++?++?+++	0.1719	38774
rs7138803	12	50247468	a	g	0.3666	0.0729	0.008	7.115e-20	+?+??+-+++?+?+++++++++++++++	0.1954	37067
rs2867131	2	610603	t	c	0.1639	-0.0972	0.0107	8.435e-20	-+-------------?-?---??-?---	0.4652	36110
rs7563362	2	620297	a	g	0.1517	-0.1021	0.0112	8.829e-20	-+-----------------+-??-?---	0.2001	37035.1
rs5017304	2	630903	a	g	0.2108	-0.0918	0.0101	1.165e-19	----------------?--+-?--?---	0.4038	37209.9
rs10865320	2	25159780	a	g	0.5502	-0.0697	0.0077	1.368e-19	------------+-----------+---	0.3875	39618
rs6738433	2	25159501	c	g	0.4487	0.0695	0.0077	1.906e-19	++++++++++++-+++++++++++-+++	0.3311	39618
rs6746013	2	25143649	c	g	0.5409	-0.0717	0.0079	1.973e-19	-------++---+?-------?--?---	0.1242	37093
rs6728219	2	25159172	t	c	0.5512	-0.0701	0.0078	2.338e-19	------------+--------?--?---	0.2311	38667.9
rs62105307	2	633661	a	g	0.2016	-0.0909	0.0101	2.416e-19	---------------???-+-+------	0.3294	37235
rs77935490	2	630902	a	t	0.2141	-0.092	0.0102	2.723e-19	------------?---?--+-?--?---	0.4304	36154.1
rs74832795	2	632592	a	g	0.7967	0.092	0.0103	3.466e-19	+++++++++++++++???+-+?++?+++	0.4095	36284.9
rs6749087	2	629818	a	t	0.2058	-0.0892	0.01	4.231e-19	----------------?--+-+------	0.5981	38160.1
rs13035713	2	633659	t	c	0.2035	-0.09	0.0101	5.11e-19	---------------???-+-+------	0.3537	37234.9
rs6749170	2	25110962	a	g	0.5657	-0.0678	0.0076	5.695e-19	--------+---+-----------+---	0.2129	39618
rs2033654	2	25103108	a	c	0.4331	0.0667	0.0075	6.545e-19	++++++++-+++-+++++++++++-+++	0.2579	39725
rs2683992	2	600575	t	g	0.8268	0.0937	0.0106	7.023e-19	+-+++++++++++++?+?+++??+?+++	0.5965	36110
rs6545790	2	25109302	a	g	0.5669	-0.0674	0.0076	8.061e-19	--------+---+-----------+---	0.2403	39618
rs7132908	12	50263148	a	g	0.3762	0.0704	0.008	1.124e-18	++++-+-+++?+-+++?-+++-++++++	0.009398	38002
rs13407913	2	25097644	a	g	0.5652	-0.0661	0.0075	1.377e-18	--------+---+-----------+---	0.3788	39717
rs13003430	2	25134344	t	c	0.5692	-0.0669	0.0076	1.406e-18	--------+---+-----------+---	0.23	39618
rs6721750	2	25128719	a	g	0.5686	-0.0662	0.0075	1.408e-18	--------+---+-----------+---	0.2288	39724
rs2033653	2	25103446	t	c	0.5658	-0.0668	0.0076	1.506e-18	--------+---+-----------+---	0.2658	39618
rs11693654	2	25107597	t	c	0.5724	-0.0676	0.0077	1.598e-18	--------+---+-----------+---	0.2815	39618
rs6545806	2	25124348	a	g	0.4308	0.0668	0.0076	1.625e-18	++++++++-+++-+++++++++++-+++	0.2078	39618
rs6754997	2	25133750	a	g	0.4308	0.0668	0.0076	1.668e-18	++++++++-+++-+++++++++++-+++	0.2228	39617.9
rs3205718	12	50261809	t	c	0.3656	0.0712	0.0081	1.764e-18	++++-+-+++++-+++?-+++-++++++	0.03633	38160
rs10206196	2	25137323	t	c	0.5685	-0.0669	0.0076	1.793e-18	--------+---+-----------+---	0.1961	39618
rs6545776	2	25099357	a	c	0.5647	-0.0667	0.0076	1.887e-18	--------+---+-----------+---	0.3606	39618
rs1550110	2	25124563	t	c	0.5691	-0.0666	0.0076	2.019e-18	--------+---+-----------+---	0.2146	39618
rs4077678	2	25122840	c	g	0.5688	-0.0667	0.0076	2.026e-18	--------+---+-----------+---	0.207	39618.1
rs28836469	2	25117215	a	g	0.5697	-0.0666	0.0076	2.107e-18	--------+---+-----------+---	0.2628	39618
rs3903070	2	25123463	c	g	0.5693	-0.0666	0.0076	2.172e-18	--------+---+-----------+---	0.2266	39618.1
rs6545813	2	25131287	t	c	0.4295	0.0667	0.0076	2.184e-18	++++++++-+++-+++++++++++-+++	0.1823	39617.9
rs6744205	2	25133148	t	c	0.5691	-0.0665	0.0076	2.25e-18	--------+---+-----------+---	0.2094	39618
rs2384058	2	25100328	a	g	0.5644	-0.0665	0.0076	2.271e-18	--------+---+-----------+---	0.3269	39618.1
rs6752483	2	25120086	t	c	0.4307	0.0665	0.0076	2.308e-18	++++++++-+++-+++++++++++-+++	0.2477	39618
rs2033656	2	25100902	c	g	0.5645	-0.0665	0.0076	2.371e-18	--------+---+-----------+---	0.336	39618
rs6545814	2	25131316	a	g	0.5704	-0.0666	0.0076	2.38e-18	--------+---+-----------+---	0.1797	39618
rs6545809	2	25126715	t	c	0.433	0.0665	0.0076	2.555e-18	++++++++-+++-+++++++++++-+++	0.2385	39617.9
rs6713978	2	25120851	t	c	0.5691	-0.0664	0.0076	2.563e-18	--------+---+-----------+---	0.2455	39618
rs6712981	2	25126230	a	g	0.5671	-0.0665	0.0076	2.576e-18	--------+---+-----------+---	0.245	39618
rs6723803	2	25120713	c	g	0.4309	0.0664	0.0076	2.576e-18	++++++++-+++-+++++++++++-+++	0.2458	39618
rs6756609	2	25121125	a	c	0.4308	0.0664	0.0076	2.58e-18	++++++++-+++-+++++++++++-+++	0.244	39618
rs2384059	2	25100338	t	c	0.4356	0.0664	0.0076	2.644e-18	++++++++-+++-+++++++++++-+++	0.3407	39618
rs6726199	2	25126328	c	g	0.433	0.0665	0.0076	2.644e-18	++++++++-+++-+++++++++++-+++	0.2419	39618.1
rs6717671	2	25127614	a	g	0.5676	-0.0665	0.0076	2.687e-18	--------+---+-----------+---	0.2322	39618
rs10200566	2	25130462	t	g	0.566	-0.0664	0.0076	2.704e-18	--------+---+-----------+---	0.2397	39618
rs7563204	2	25125075	t	g	0.567	-0.0665	0.0076	2.726e-18	--------+---+-----------+---	0.246	39618.1
rs876186	2	25125585	t	c	0.433	0.0665	0.0076	2.737e-18	++++++++-+++-+++++++++++-+++	0.245	39618
rs6724772	2	25128730	t	c	0.5672	-0.0664	0.0076	2.777e-18	--------+---+-----------+---	0.2338	39618
rs13410999	2	25097939	t	c	0.5641	-0.0663	0.0076	2.811e-18	--------+---+-----------+---	0.3754	39618
rs6705446	2	25118608	t	c	0.569	-0.0663	0.0076	2.89e-18	--------+---+-----------+---	0.2433	39618
rs6545800	2	25118885	t	c	0.431	0.0663	0.0076	2.965e-18	++++++++-+++-+++++++++++-+++	0.2409	39618
rs59086897	2	25145173	a	t	0.4316	0.0697	0.008	2.999e-18	+++++++--+++-+++?-++++++-+++	0.1213	38160
rs6722587	2	25132192	a	c	0.4309	0.0662	0.0076	3.049e-18	++++++++-+++-+++++++++++-+++	0.2055	39618.1
rs11892869	2	25096692	a	t	0.564	-0.0662	0.0076	3.052e-18	--------+---+-----------+---	0.3757	39618
rs12713422	2	25134497	a	c	0.5716	-0.0671	0.0077	3.074e-18	--------+---+--------?--?---	0.248	38668
rs13405307	2	650973	t	c	0.8558	0.1008	0.0116	3.195e-18	+-++++-++++++++?+?+--??+?+++	0.1661	36110.1
rs6733224	2	25130907	t	c	0.5668	-0.0661	0.0076	3.676e-18	--------+---+-----------+---	0.2248	39617.9
rs6730191	2	25130920	a	g	0.5668	-0.0661	0.0076	3.682e-18	--------+---+-----------+---	0.2246	39617.9
rs10165451	2	25115243	a	g	0.57	-0.0669	0.0077	3.706e-18	--------+---+--------?--?---	0.2922	38668
rs10198275	2	25130542	a	c	0.5671	-0.0661	0.0076	3.959e-18	--------+---+-----------+---	0.2483	39618
rs7580081	2	25097072	c	g	0.4365	0.066	0.0076	4.162e-18	++++++++-+++-+++++++++++-+++	0.3702	39618.1
rs10198356	2	25130592	a	g	0.5671	-0.066	0.0076	4.336e-18	--------+---+-----------+---	0.2392	39618
rs7567997	2	25096952	t	c	0.5626	-0.066	0.0076	4.621e-18	--------+---+-----------+---	0.364	39618
rs6706316	2	25128351	c	g	0.5673	-0.0667	0.0077	4.658e-18	--------+---+--------?--?---	0.2597	38668
rs7565460	2	25130073	t	c	0.4331	0.066	0.0076	4.67e-18	++++++++-+++-+++++++++++-+++	0.2467	39618
rs112502508	12	50246252	a	g	0.6319	-0.0679	0.0078	4.807e-18	----+-+-----+-----+-------+-	0.04632	39618
rs11689546	2	25130451	a	g	0.5673	-0.066	0.0076	4.876e-18	--------+---+-----------+---	0.2366	39618
rs11900505	2	25131986	a	c	0.5694	-0.0665	0.0077	5.255e-18	--------+---+--------?--?---	0.2233	38668
rs10203482	2	25136916	t	c	0.5705	-0.067	0.0077	5.312e-18	--------+---+--------?--?---	0.1814	38668
rs6718510	2	25122323	a	c	0.5845	-0.0686	0.0079	5.79e-18	--------+---+---?-------+---	0.1144	38160
rs6732341	2	629817	c	g	0.7914	0.086	0.01	5.794e-18	++++++++++++++++?++---++++++	0.48	38159.9
rs6718511	2	25122324	a	g	0.5856	-0.0686	0.008	6.945e-18	--------+---+---?-------+---	0.1206	38160
rs11689543	2	25130440	a	t	0.5675	-0.0663	0.0077	7.217e-18	--------+---+--------?--?---	0.258	38668
rs10203386	2	25136866	a	t	0.428	0.0664	0.0077	7.511e-18	++++++++-+++-++++++++?++?+++	0.173	38668
rs4430895	2	25161386	t	c	0.441	0.0685	0.008	8.005e-18	++++++++++++-+++?++++?++?+++	0.4113	37210.1
rs4459693	2	25161265	t	g	0.44	0.068	0.0079	8.095e-18	++++++++++++-+++?+++++++++++	0.3637	38160.1
rs13035244	2	25134009	t	c	0.5722	-0.0656	0.0076	8.18e-18	--------+---+-----------+---	0.2093	39618
rs7576172	2	25129787	a	g	0.5706	-0.0658	0.0077	1.171e-17	-------++---+-----------+---	0.233	39617.9
rs4343432	2	25161236	a	g	0.5548	-0.0668	0.0078	1.331e-17	------------+---?-----------	0.5065	38160.1
rs13028737	2	630782	a	g	0.7647	0.084	0.0098	1.431e-17	++++++++++++++++?++--+++++++	0.4986	38160
rs2384061	2	25135620	a	g	0.4089	0.0645	0.0076	1.544e-17	++++++++++++-+++++++++++-+++	0.2418	39725
rs17817449	16	53813367	t	g	0.6017	-0.0683	0.008	1.69e-17	-?-??-+++-?-?-+----+--------	0.0004523	36963
rs11675198	2	25107589	c	g	0.4103	0.0666	0.0078	1.705e-17	++++++++++++-++++++++?++?+++	0.3079	38668
rs1865689	2	25108197	t	c	0.5852	-0.0654	0.0077	1.716e-17	------------+-----------+---	0.2264	39618
rs35803386	2	25105921	t	c	0.4088	0.0654	0.0077	1.861e-17	+++++++-++++-+++++++++++-+++	0.246	39618
rs7605335	2	25109317	a	g	0.4148	0.0653	0.0077	1.935e-17	++++++++++++-+++++++++++-+++	0.2171	39618.1
rs11686663	2	25107759	t	c	0.4149	0.0652	0.0077	2.134e-17	++++++++++++-+++++++++++-+++	0.2146	39618
rs8050136	16	53816275	a	c	0.3995	0.067	0.0079	2.244e-17	+?+??+---+?+?+-++++-++++++++	0.000372	37070
rs916485	2	25082273	t	c	0.567	-0.0646	0.0076	2.409e-17	--------+---+-----------+---	0.4592	39618
rs2384055	2	25085268	a	t	0.3918	0.0687	0.0081	2.478e-17	+++++++-++++-+++?+++++++-+++	0.2925	38160
rs2033655	2	25101092	a	g	0.416	0.0641	0.0076	2.624e-17	++++++++++++-+++++++++++-+++	0.3053	39725
rs6737082	2	25138040	a	c	0.5389	-0.0646	0.0076	2.901e-17	----+---+---+----+------+---	0.1138	39618
rs9939609	16	53820527	a	t	0.3999	0.0685	0.0081	3.184e-17	+?+??+---+?+?+-?+?+-++++++++	0.000325	36038
rs7591460	2	25103967	a	c	0.5837	-0.0655	0.0078	3.202e-17	------------+--------?--?---	0.2946	38668
rs10865315	2	25100738	a	c	0.4157	0.0649	0.0077	3.3e-17	++++++++++++-+++++++++++-+++	0.2914	39618
rs10865321	2	25159855	t	c	0.567	-0.0673	0.008	3.346e-17	------------+---?-------+---	0.3008	38160
rs2118826	2	25191745	a	t	0.4746	0.0666	0.0079	3.44e-17	++++++++++++-+++?+++++++++++	0.787	38160
rs34697209	2	25127394	a	g	0.5846	-0.0651	0.0077	4.233e-17	------------+--------?--?---	0.2906	38668.1
rs6725517	2	25129473	a	g	0.5846	-0.0644	0.0077	4.276e-17	------------+-----------+---	0.2167	39618
rs62033403	16	53822237	a	g	0.6014	-0.065	0.0077	4.304e-17	----+-+++-+---+----+--------	0.0005505	39618
rs11683929	2	25091869	a	g	0.5848	-0.0643	0.0077	4.727e-17	------------+-----------+---	0.3186	39618
rs13019149	2	25093151	t	c	0.4128	0.0645	0.0077	5.721e-17	++++++++++++-+++++++++++-+++	0.2488	39618
rs2947415	2	609177	a	g	0.2468	-0.0824	0.0098	5.839e-17	-+--------------?---+-------	0.8993	38160
rs62033399	16	53810943	t	c	0.3979	0.0645	0.0077	6.954e-17	++++-+---+-+++-++++-++++++++	0.0004963	39617.9
rs12367809	12	50256063	t	c	0.3625	0.0675	0.0081	6.999e-17	++++-+-+++++-+++?-++++++++++	0.02932	38160
rs1421085	16	53800954	t	c	0.5924	-0.0677	0.0081	7.818e-17	-?-??-+++-?-?-+-?--+--------	0.001747	35505
rs1529897	2	25086827	t	g	0.5833	-0.0638	0.0077	7.895e-17	------------+-----------+---	0.3194	39618
rs2384057	2	25100167	c	g	0.5852	-0.064	0.0077	8.02e-17	------------+-----------+---	0.3125	39618.1
rs10865322	2	25159858	a	g	0.5698	-0.0667	0.008	8.087e-17	------------+---?---+---+---	0.3013	38160
rs1541984	2	25082414	a	g	0.4134	0.063	0.0076	8.864e-17	++++++++++++-+++++++++++-+++	0.3842	39724
rs11075989	16	53819877	t	c	0.399	0.0642	0.0077	9.415e-17	++++-+---+-+++-++++-++++++++	0.0006727	39618
rs11075988	16	53819771	a	g	0.399	0.0641	0.0077	1.036e-16	++++-+---+-+++-++++-++++++++	0.000716	39618
rs8043757	16	53813450	a	t	0.6022	-0.0641	0.0077	1.057e-16	----+-+++-+---+----+--------	0.000587	39618
rs66908032	16	53822142	a	c	0.3986	0.0649	0.0078	1.1e-16	++++-+---+-+++-?+?+-++++++++	0.0002691	38693
rs72803697	16	53822183	t	c	0.3986	0.0648	0.0078	1.122e-16	++++-+---+-+++-?+?+-++++++++	0.0002671	38693
rs62105306	2	633660	t	c	0.7367	0.0809	0.0098	1.159e-16	++++++++++++++++?++---++++++	0.3051	38160
rs9923233	16	53819198	c	g	0.399	0.0639	0.0077	1.24e-16	++++-+---+-+++-++++-++++++++	0.0006037	39618
rs56313538	16	53818834	a	g	0.601	-0.0639	0.0077	1.308e-16	----+-+++-+---+----+--------	0.0005906	39618
rs1558902	16	53803574	a	t	0.4075	0.068	0.0082	1.318e-16	+?+??+---+?+?+-???+-++++++++	0.0007144	34580
rs7185735	16	53822651	a	g	0.5998	-0.0647	0.0078	1.346e-16	----+-+++-+---+?-?-+--------	0.0004981	38693
rs7564167	2	645190	a	g	0.0673	-0.1324	0.0161	1.716e-16	---------------------+--+---	0.3049	39618
rs7187250	16	53810546	a	c	0.3982	0.0644	0.0078	1.728e-16	++++-+---+-+++-?+?+-++++++++	0.0002601	38693.1
rs7202296	16	53821690	a	g	0.601	-0.0643	0.0078	1.898e-16	----+-+++-+---+?-?-+--------	0.0002957	38693
rs7206410	16	53821297	t	c	0.601	-0.0643	0.0078	1.902e-16	----+-+++-+---+?-?-+--------	0.0003026	38693
rs10186242	2	25130684	t	c	0.4086	0.0661	0.008	1.908e-16	+++++++--+++-+++?++-++++-+++	0.0913	38160
rs7193144	16	53810686	t	c	0.6023	-0.0642	0.0078	1.992e-16	----+-+++-+---+?-?-+--------	0.0002726	38693
rs11075992	16	53820066	t	c	0.601	-0.0642	0.0078	2.119e-16	----+-+++-+---+?-?-+--------	0.0003534	38692.9
rs9937709	16	53820813	a	g	0.5852	-0.0631	0.0077	2.212e-16	----+-+++-+---+--------+----	0.0001396	39617.9
rs11687089	2	25082926	t	c	0.5863	-0.0629	0.0077	2.294e-16	------------+-----------+---	0.3945	39618
rs11075991	16	53819937	a	t	0.601	-0.0641	0.0078	2.327e-16	----+-+++-+---+?-?-+--------	0.0003412	38693
rs11075990	16	53819893	a	g	0.601	-0.064	0.0078	2.413e-16	----+-+++-+---+?-?-+--------	0.0003332	38693
rs11675457	2	25079770	t	c	0.4148	0.0628	0.0077	2.481e-16	++++++++++++-+++++++++++-+++	0.3897	39618.1
rs1121980	16	53809247	a	g	0.4282	0.066	0.0081	2.499e-16	+?+??+---+?+?+-+?++++++-++++	0.0001163	35505.1
rs35177510	2	25089594	a	c	0.4204	0.0627	0.0077	2.543e-16	++++++++++++-+++++++++++-+++	0.4151	39618
rs8063057	16	53812433	t	c	0.6021	-0.064	0.0078	2.544e-16	----+-+++-+---+?-?-+--------	0.0002531	38692.9
rs8051591	16	53816752	a	g	0.6017	-0.0639	0.0078	2.555e-16	----+-+++-+---+?-?-+--------	0.0002776	38693
rs9926289	16	53820503	a	g	0.3996	0.0639	0.0078	2.601e-16	++++-+---+-+++-?+?+-++++++++	0.0002951	38693
rs9935401	16	53816838	a	g	0.3983	0.0638	0.0078	2.62e-16	++++-+---+-+++-?+?+-++++++++	0.0002787	38693
rs9923312	16	53819367	a	g	0.399	0.0638	0.0078	2.975e-16	++++-+---+-+++-?+?+-++++++++	0.0003008	38693
rs9972653	16	53814363	t	g	0.3979	0.0638	0.0078	2.993e-16	++++-+---+-+++-?+?+-++++++++	0.0002664	38693
rs9936385	16	53819169	t	c	0.601	-0.0638	0.0078	3.134e-16	----+-+++-+---+?-?-+--------	0.0002996	38692.9
rs3751814	16	53818724	a	g	0.399	0.0637	0.0078	3.309e-16	++++-+---+-+++-?+?+-++++++++	0.000288	38693
rs1172294	2	25169200	a	g	0.5354	-0.0635	0.0078	3.348e-16	------------+---?-----------	0.7586	38160
rs1893492	12	50270855	t	g	0.6391	-0.066	0.0081	4.12e-16	----+-+-----+---?+---+------	0.008929	38160
rs7306275	12	50250111	a	g	0.365	0.0672	0.0083	4.904e-16	+-++-+-+++++-+++?+-+++++++++	0.0502	38160
rs297924	12	50285061	t	c	0.615	-0.063	0.0078	5.087e-16	------+-----+---?-+--+------	0.04387	38267
rs3731623	2	25163783	t	c	0.5376	-0.0629	0.0078	6.249e-16	------------+---?-----------	0.725	38160.1
rs73116325	12	50275385	t	c	0.3489	0.0657	0.0081	6.385e-16	++++-+-+++++-+++?++++-++++++	0.01845	38160
rs7201850	16	53821862	t	c	0.415	0.0628	0.0078	6.623e-16	++++-+---+-+++-?+?+++++-++++	6.195e-05	38693
rs62033404	16	53822239	a	g	0.6019	-0.0632	0.0078	6.713e-16	----+-+++-+---+----+-?--?---	0.001109	38668
rs56094641	16	53806453	a	g	0.5931	-0.0637	0.0079	6.981e-16	----+-+++-+---+???-+--------	0.000664	37235
rs62048402	16	53803223	a	g	0.4068	0.0636	0.0079	8.397e-16	++++-+---+-+++-???+-++++++++	0.0006479	37235.1
rs11642015	16	53802494	t	c	0.4068	0.0634	0.0079	9.769e-16	++++-+---+-+++-???+-++++++++	0.0006296	37235
rs55872725	16	53809123	t	c	0.4069	0.0634	0.0079	9.803e-16	++++-+---+-+++-???+-++++++++	0.0006092	37235
rs9933509	16	53818167	t	c	0.5851	-0.0622	0.0078	1.075e-15	----+-+++-+---+?-?-----+----	5.961e-05	38693
rs11169199	12	50280430	t	c	0.633	-0.0645	0.0081	1.104e-15	------+-----+---?----+------	0.1351	38160
rs58048722	2	25187825	t	c	0.5349	-0.0627	0.0078	1.245e-15	------------+---?----?--?---	0.6315	37210
rs4665736	2	25187599	t	c	0.5409	-0.0658	0.0082	1.363e-15	-?-??--+--?-?---?----?--?---	0.8461	34555.1
rs34932517	2	25281641	t	c	0.5046	-0.0637	0.008	1.38e-15	------------+---?---+-------	0.7215	38159.9
rs73116335	12	50285780	t	g	0.6315	-0.0633	0.0079	1.474e-15	------+-----+---?----+------	0.1115	38160
rs543874	1	177889480	a	g	0.8076	-0.0793	0.0099	1.616e-15	-?-??-----?-?---------+---+-	0.1408	36963
rs12146733	12	50270364	c	g	0.3411	0.066	0.0083	1.627e-15	++++-+-+++++-+++?+++++++++++	0.03367	38160
rs9930333	16	53799977	t	g	0.5726	-0.064	0.008	1.763e-15	-?-??-+++-?-?-+???-+---+----	8.064e-05	34687
rs1470039	2	25193469	c	g	0.5349	-0.0623	0.0078	1.812e-15	------------+---?----?--?---	0.6494	37210
rs10913469	1	177913519	t	c	0.8099	-0.0785	0.0099	1.871e-15	-?-??-----?-?---------+---+-	0.2433	37070
rs9940278	16	53800200	t	c	0.4259	0.0617	0.0078	1.892e-15	++++-+---+-+-+-+?++-+++-++++	0.0002579	38160
rs9931900	16	53818813	a	g	0.5863	-0.0617	0.0078	1.947e-15	----+-+++-+---+?-?-----+----	8.124e-05	38693
rs1077492	2	25286435	t	c	0.5381	-0.061	0.0077	1.971e-15	------------+---?-----------	0.7032	38259
rs62143001	2	25288675	a	g	0.5347	-0.0615	0.0078	2.41e-15	------------+---?---+-------	0.7294	38160
rs6736210	2	25131161	t	c	0.5983	-0.064	0.0081	2.589e-15	-------++---+---?--+----+---	0.06994	38160.1
rs1421086	16	53801343	a	c	0.4262	0.0613	0.0078	2.686e-15	++++-+---+-+-+-+?++-+++-++++	0.0002119	38160
rs17201502	12	50285562	t	c	0.3531	0.0625	0.0079	2.692e-15	++++++-+++++-+++?-+++-++++++	0.02385	38267
rs7202116	16	53821615	a	g	0.6014	-0.0625	0.0079	2.779e-15	----+-+++-+---+?-?-+-?--?---	0.0005812	37743
rs2867121	2	658550	a	g	0.9237	0.124	0.0157	2.942e-15	+++++++++++++++?+?++-?++?+++	0.7747	37742.9
rs11075985	16	53805207	a	c	0.4264	0.0618	0.0078	3.233e-15	++++-+---+-+-+-???+++++-++++	5.481e-05	37235
rs1558901	16	53803187	a	t	0.5737	-0.0617	0.0078	3.35e-15	----+-+++-+-+-+???-----+----	5.658e-05	37234.9
rs79994966	16	53823727	t	c	0.6068	-0.0622	0.0079	3.527e-15	----+-+++-+---+-?--+--------	0.003685	38160
rs13003179	2	25269194	t	c	0.5355	-0.0612	0.0078	3.548e-15	------------+---?-----------	0.7291	38160
rs13029479	2	655222	a	g	0.1143	-0.0965	0.0123	3.693e-15	---------------------+------	0.2308	39724
rs1971136	2	25291539	t	c	0.5336	-0.0612	0.0078	3.838e-15	------------+---?---+-------	0.7444	38160
rs6720580	2	25270433	t	c	0.465	0.0617	0.0079	4.009e-15	++++++++++++-+++?++++?++?+++	0.6449	37210
rs12466350	2	25239969	t	c	0.5341	-0.061	0.0078	4.033e-15	------------+---?-----------	0.8065	38160
rs9937354	16	53799847	a	g	0.4257	0.0616	0.0078	4.211e-15	++++-+---+-+-+-???+-+++-++++	0.0001196	37235
rs9941349	16	53825488	t	c	0.4106	0.0626	0.008	4.312e-15	+?+??+---+?+?+-+?+++++++++++	0.0009249	35603
rs11689570	2	25245500	a	g	0.5309	-0.0614	0.0078	4.337e-15	------------+---?-----------	0.7654	38160
rs9928094	16	53799905	a	g	0.5743	-0.0615	0.0078	4.35e-15	----+-+++-+-+-+???-+---+----	0.0001208	37235
rs62140636	2	25233811	t	c	0.4669	0.061	0.0078	4.481e-15	++++++++++++-+++?+++-+++++++	0.7302	38160
rs6718628	2	25131170	c	g	0.5982	-0.0641	0.0082	4.555e-15	-------++---+---?--+-?--?---	0.07673	37210
rs9937053	16	53799507	a	g	0.4256	0.0614	0.0078	5.263e-15	++++-+---+-+-+-???+-+++-++++	0.0001016	37235
rs13008590	2	630788	a	g	0.2833	-0.0767	0.0098	5.431e-15	----------------?--++?--?---	0.6315	37210
rs11682135	2	25205377	a	g	0.5217	-0.062	0.0079	5.517e-15	------------+---?----?--?---	0.6523	37210.1
rs4665276	2	25213333	t	c	0.5357	-0.0611	0.0078	5.815e-15	------------+---?----?--?---	0.676	37210
rs11125884	2	25239264	a	g	0.4654	0.0607	0.0078	5.987e-15	++++++++++++-+++?+++++++++++	0.813	38160
rs9940128	16	53800754	a	g	0.4262	0.0612	0.0078	6.049e-15	++++-+---+-+-+-???+++++-++++	9.872e-05	37235
rs9930397	16	53799985	a	t	0.4259	0.0612	0.0078	6.113e-15	++++-+---+-+-+-???+-+++-++++	0.0001144	37235
rs9940646	16	53800629	c	g	0.5739	-0.0611	0.0078	6.513e-15	----+-+++-+-+-+???-+---+----	9.082e-05	37235
rs9923544	16	53801985	t	c	0.4262	0.0611	0.0078	6.55e-15	++++-+---+-+-+-???+-+++-++++	9.154e-05	37235.1
rs9939973	16	53800568	a	g	0.4261	0.0611	0.0078	6.645e-15	++++-+---+-+-+-???+-+++-++++	8.732e-05	37235
rs62033405	16	53822387	t	c	0.3935	0.0612	0.0079	6.695e-15	++++-+---+-+++-+?++-++++++++	0.006465	38160
rs6545766	2	25077856	t	c	0.3966	0.0621	0.008	6.817e-15	+++-++++++++-+++?++++?-+?+++	0.3021	37210
rs9923147	16	53801549	t	c	0.4262	0.061	0.0078	6.908e-15	++++-+---+-+-+-???+-+++-++++	9.382e-05	37234.9
rs12618252	2	25207950	a	g	0.5358	-0.0601	0.0077	7.055e-15	------------+---?-----------	0.7549	38160
rs7608976	2	25075281	a	g	0.4119	0.0612	0.0079	7.525e-15	++++++++++++-+++?+++++-+-+++	0.4449	38159.9
rs17817712	16	53821125	a	g	0.6063	-0.0609	0.0079	8.242e-15	----+-+++-+---+-?--+--------	0.006993	38160.1
rs13387729	2	25076126	a	g	0.5846	-0.0609	0.0078	8.331e-15	------------+---?-----+-+---	0.3288	38160
rs539515	1	177889025	a	c	0.8076	-0.0741	0.0096	9.504e-15	------------+---------+---+-	0.1458	39618
rs62033400	16	53811788	a	g	0.6061	-0.0607	0.0078	1.052e-14	----+-+++-+---+-?--+--------	0.005753	38160
rs1982200	2	25205427	t	c	0.5378	-0.0596	0.0077	1.104e-14	------------+---?----?--?---	0.6455	37315
rs7206629	16	53821413	t	c	0.5854	-0.0607	0.0079	1.117e-14	----+-+++-+---+?-?---?-+?---	0.00014	37743
rs3751812	16	53818460	t	g	0.3943	0.0598	0.0077	1.156e-14	++++-+---+-+++-+?++-++++++++	0.006562	38265
rs7597332	2	25075675	a	g	0.5847	-0.0606	0.0078	1.194e-14	------------+---?-----+-+---	0.3625	38160
rs56137030	16	53825905	a	g	0.3953	0.0606	0.0079	1.306e-14	++++-+---+-+++-+?++-++++++++	0.007805	38160
rs9927317	16	53820996	c	g	0.6084	-0.0605	0.0079	1.841e-14	----+-++--+---+-?--+--------	0.01073	38160
rs10468280	16	53827479	a	g	0.6064	-0.0608	0.0079	1.913e-14	----+-+++-+---+???-+--------	0.00323	37235
rs28567725	16	53826028	t	c	0.59	-0.0595	0.0078	2.09e-14	----+-+++-+---+-?-----------	0.001159	38159.9
rs7190396	16	53822502	t	g	0.6053	-0.0607	0.0079	2.1e-14	----+-+++-+---+-?--+--------	0.003391	38160
rs9931494	16	53827179	c	g	0.5905	-0.0595	0.0078	2.141e-14	----+-+++-+---+-?-----------	0.001113	38160
rs62033408	16	53827962	a	g	0.6064	-0.0607	0.0079	2.149e-14	----+-+++-+---+???-+--------	0.003498	37235
rs7206122	16	53822440	a	g	0.4036	0.0601	0.0079	2.195e-14	++++-+--++-+++-+?++-++++++++	0.01162	38160
rs506589	1	177894287	t	c	0.8063	-0.073	0.0096	2.337e-14	------------+---------+---+-	0.1367	39618.1
rs509325	1	177894591	t	g	0.8063	-0.0729	0.0096	2.44e-14	------------+---------+---+-	0.1348	39618
rs12042908	1	74997762	a	g	0.4603	0.0586	0.0077	2.765e-14	++++++-+++-++++?+?++++++++-+	0.7525	38693
rs17817964	16	53828066	t	c	0.395	0.0604	0.0079	2.867e-14	++++-+---+-+++-???+-++++++++	0.003318	37235
rs2344508	1	74999713	a	g	0.5393	-0.0584	0.0077	3.125e-14	------+---+----?-?--------+-	0.7526	38693
rs545608	1	177899121	c	g	0.1938	0.0726	0.0096	3.159e-14	++++++++++++-+++++++++-+++-+	0.162	39618.1
rs9930506	16	53830465	a	g	0.5728	-0.0613	0.0081	3.249e-14	-?-??-+++-?-?-+-?--+---+----	0.000753	35505
rs7574085	2	657578	c	g	0.234	-0.0697	0.0092	3.419e-14	-------++---+--?-?---+--+---	0.214	38692.9
rs563590	2	25331172	a	g	0.5174	0.0584	0.0077	3.628e-14	++++++++++++-+++++++-?++?+++	0.7341	38668
rs17817497	16	53815435	t	c	0.6062	-0.06	0.0079	3.703e-14	----+-+++-+---+???-+--------	0.003473	37235.1
rs546217	2	25311537	a	c	0.5149	0.0565	0.0075	4.034e-14	++++++++++++-++++++++-++-+++	0.7613	39722
rs7551507	1	74995225	t	c	0.5388	-0.0581	0.0077	4.171e-14	------+---+----?-?--------+-	0.7827	38693
rs4407278	2	648607	t	c	0.683	0.0712	0.0094	4.947e-14	+-++++++++-+++++?++-+?++?+++	0.4105	37210.1
rs7514705	1	75006720	t	c	0.46	0.058	0.0077	5.002e-14	++++++-+++-++++?+?++++++++-+	0.696	38693
rs11210476	1	74995450	a	g	0.4594	0.0578	0.0077	5.192e-14	++++++-+++-++++?+?++++++++-+	0.7606	38693
rs754536	2	25176200	t	c	0.5182	-0.0586	0.0078	5.26e-14	------------+---?-----------	0.7976	38160.1
rs7576788	2	25083310	t	c	0.5591	-0.0591	0.0079	5.368e-14	---+--+-----+---?-----+-+---	0.2766	38160
rs7302855	12	50244043	t	c	0.4455	0.0577	0.0077	5.592e-14	++++-+--++++-++++--+++++++-+	0.1397	39618
rs3845347	1	75004048	a	g	0.54	-0.0577	0.0077	5.999e-14	------+---+----?-?--------+-	0.7147	38693
rs754537	2	25176277	a	t	0.4813	0.0584	0.0078	6.28e-14	++++++++++++-+++?+++++++++++	0.7905	38160
rs7526762	1	74993318	a	g	0.4586	0.0576	0.0077	6.752e-14	++++++-+++-++++?+?++++++++-+	0.8011	38692.9
rs7520945	1	75004943	t	c	0.46	0.0576	0.0077	6.838e-14	++++++-+++-++++?+?++++++++-+	0.7082	38693
rs6604867	1	74992278	t	c	0.4596	0.0575	0.0077	7.017e-14	++++++-+++-++++?+?++++++++-+	0.8234	38693
rs12566985	1	75002193	a	g	0.5411	-0.0575	0.0077	7.33e-14	------+---+----?-?--------+-	0.6928	38693
rs7303074	12	50244024	a	g	0.4409	0.0574	0.0077	7.857e-14	++++-+--++++-+++++-+++++++-+	0.1682	39617.9
rs28429148	16	53798319	a	g	0.431	0.0595	0.008	7.965e-14	++++-+---+-+++-+?++++++-++++	0.00523	38160
rs141070800	12	50272835	a	g	0.5848	-0.0618	0.0083	8.016e-14	------------+---?---------+-	0.1532	38159.9
rs633715	1	177852580	t	c	0.7949	-0.0705	0.0094	8.081e-14	-?-??-----?-+---------+---+-	0.2565	38124.1
rs7553348	1	75005067	a	g	0.5412	-0.0574	0.0077	8.175e-14	------+---+----?-?--------+-	0.6887	38693
rs62033406	16	53824226	a	g	0.584	-0.0589	0.0079	8.796e-14	----+-++--+---+???----------	0.01483	37235
rs11684464	2	25340610	a	g	0.5429	0.057	0.0077	1.002e-13	++++++++++++-+++++++--++++++	0.7764	39618
rs475868	2	25318059	a	g	0.5172	0.0566	0.0076	1.012e-13	++++++++++++-++++++++-++-+++	0.7581	39618
rs2917916	2	25316336	a	c	0.517	0.0565	0.0076	1.081e-13	++++++++++++-++++++++-++-+++	0.7433	39618
rs661691	1	177861357	c	g	0.1979	0.0721	0.0097	1.1e-13	++++++++++++?++?+?++++-+++-+	0.3471	37637
rs8047587	16	53798622	t	g	0.4387	0.0582	0.0078	1.135e-13	++++-+---+-+-+-??++++++-++++	0.0007508	37786
rs10875982	12	50245706	a	g	0.5522	-0.0563	0.0076	1.142e-13	----+-+-----+--?-?+-------+-	0.1537	38800
rs2438679	2	25317653	t	c	0.4818	-0.0565	0.0076	1.146e-13	------------+--------+--+---	0.7598	39618
rs564667	2	25310860	a	t	0.5167	0.0563	0.0076	1.289e-13	++++++++++++-++++++++-++-+++	0.7262	39618
rs2918630	2	25314186	t	c	0.5169	0.0562	0.0076	1.318e-13	++++++++++++-++++++++-++-+++	0.7322	39618
rs1266155	1	177881424	a	g	0.1947	0.0701	0.0095	1.541e-13	++++++++++++-+++++++++-+++-+	0.2176	39618
rs497567	2	25335089	a	g	0.448	-0.0571	0.0077	1.627e-13	------------+-------+?--?---	0.8535	38668
rs522806	2	25316584	a	c	0.4512	-0.0561	0.0076	1.635e-13	------------+-------+?--?---	0.8625	38771
rs1514174	1	74993063	t	c	0.5415	-0.0567	0.0077	1.668e-13	------+---+----------?--?-+-	0.8411	38668
rs4650277	1	74993721	a	g	0.4569	0.0567	0.0077	1.73e-13	++++++-+++-++++?+?++++++++-+	0.7999	38693
rs62033413	16	53830055	c	g	0.5934	-0.0578	0.0078	1.734e-13	----+-+++-+---+-?--+--------	0.002508	38160.1
rs10875980	12	50244767	a	t	0.5538	-0.0567	0.0077	1.754e-13	----+-+-----+--?-?+-------+-	0.1532	38693.1
rs9930501	16	53830452	a	g	0.5736	-0.0572	0.0078	1.761e-13	----+-+++-+---+-?--+---+----	0.001063	38160
rs9932754	16	53830491	t	c	0.5741	-0.0571	0.0078	1.882e-13	----+-+++-+---+-?--+---+----	0.001044	38160
rs6726261	2	25153986	t	c	0.6478	-0.0581	0.0079	1.906e-13	-------++---+--------?+-?---	0.2362	38773
rs7569646	2	25152800	a	g	0.6468	-0.0583	0.0079	1.907e-13	-------++---+---------+-+---	0.1734	39618
rs9922619	16	53831771	t	g	0.4258	0.0572	0.0078	1.936e-13	++++-+---+-+++-+?++-+++-++++	0.000962	38160
rs633754	1	177879935	t	c	0.8048	-0.0698	0.0095	1.936e-13	------------+---------+---+-	0.2169	39618
rs11169182	12	50248052	t	c	0.4607	0.0559	0.0076	2.023e-13	++++-+-+++++-+++++-+++++++-+	0.09136	39618
rs567359	2	25304574	a	g	0.5433	0.0561	0.0076	2.035e-13	++++++++++++-+++++++--++++++	0.8014	39618
rs72805611	16	53831354	t	c	0.4052	0.0583	0.0079	2.097e-13	++++-+---+-+++-???+-++++++++	0.002044	37235
rs6604872	1	75004611	t	c	0.4606	0.0557	0.0076	2.126e-13	++++++-+++-++++?+?++++++++-+	0.6523	38799
rs9922708	16	53831146	t	c	0.4244	0.0571	0.0078	2.128e-13	++++-+---+-+++-+?++-+++-++++	0.0009998	38160
rs488817	2	25332696	t	c	0.4409	-0.0564	0.0077	2.128e-13	------------+-------++------	0.8553	39618
rs7553158	1	75005238	a	g	0.5405	-0.0556	0.0076	2.302e-13	------+---+----?-?--------+-	0.6228	38799
rs10218727	1	75012637	a	g	0.4193	0.0579	0.0079	2.327e-13	++++++--+--++++?+?++++++++-+	0.6082	38693
rs1530016	2	25305756	t	c	0.4505	-0.0556	0.0076	2.65e-13	------------+-------+?--?---	0.8638	38770
rs2577277	2	25310247	t	c	0.5513	0.0565	0.0077	2.687e-13	++++++++++++-+++++++-?++?+++	0.8605	38668
rs7299134	12	50243672	a	g	0.5527	-0.0563	0.0077	2.711e-13	----+-++----+--?-?+-------+-	0.1845	38693
rs551573	2	25305504	a	g	0.4564	-0.0557	0.0076	2.933e-13	------------+-------++------	0.7895	39618
rs530951	2	25307005	t	c	0.4481	-0.0561	0.0077	3.268e-13	------------+-------+?--?---	0.8674	38668
rs3895907	1	75006027	a	g	0.4593	0.0566	0.0078	3.276e-13	++++++-+++-++++?+?+++?++?+-+	0.6806	37743
rs4463912	12	50208014	t	c	0.4176	0.0563	0.0077	3.308e-13	+-++++++++++-+++++++++++++++	0.4275	39618
rs12041912	1	75003710	a	g	0.5389	-0.0566	0.0078	3.426e-13	------+---+----?-?---?--?-+-	0.7017	37743
rs12041852	1	75003500	a	g	0.5389	-0.0565	0.0078	3.449e-13	------+---+----?-?---?--?-+-	0.7017	37743
rs532504	1	177878933	a	g	0.1926	0.0706	0.0097	3.659e-13	++++++++++++-++?+?++++-+++-+	0.1454	38693
rs11075993	16	53837144	t	g	0.4061	0.0576	0.0079	3.766e-13	++++-+---+-+++-???+-++++++++	0.001562	37235
rs72805613	16	53837342	a	g	0.5939	-0.0576	0.0079	3.816e-13	----+-+++-+---+???-+--------	0.001563	37235
rs519111	2	25333735	t	c	0.5526	0.0555	0.0077	3.916e-13	++++++++++++-+++++++--++++++	0.8388	39618
rs11169176	12	50241013	a	g	0.4469	0.0559	0.0077	4.343e-13	++++-+--++++-++?+?-+++++++-+	0.2408	38693
rs7525548	1	75001474	a	t	0.4597	0.0562	0.0078	4.525e-13	+-++++-+++-++++?+?+++?++?+-+	0.6744	37743
rs512419	2	25310155	t	g	0.4496	-0.0558	0.0077	4.654e-13	------------+-------+?--?---	0.8741	38668
rs565906	2	25308576	t	c	0.5487	0.0555	0.0077	4.748e-13	++++++++++++-+++++++--++++++	0.786	39618
rs478222	2	25301755	a	t	0.5527	0.0552	0.0076	4.868e-13	++++++++++++-+++++++--++++++	0.8624	39618.1
rs9933040	16	53830867	a	t	0.4266	0.0568	0.0079	4.924e-13	++++-+---+-+++-???+-+++-++++	0.0006019	37235.1
rs3843262	1	75013054	a	t	0.4178	0.0573	0.0079	5.142e-13	++++++--+--++++?+?++-+++++-+	0.6006	38693
rs12149574	16	53840525	c	g	0.5939	-0.057	0.0079	5.368e-13	----+-+++-+---+??--+--------	0.00215	37786
rs2336448	12	50212628	t	c	0.415	0.0556	0.0077	5.535e-13	++++++++++++-+++++-+++++++++	0.5887	39618
rs12149832	16	53842908	a	g	0.4024	0.0569	0.0079	5.735e-13	++++-+---+-+++-+?++-++++++++	0.003386	38160
rs839652	2	25334340	t	c	0.449	-0.0552	0.0077	5.832e-13	------------+-------++------	0.8463	39618
rs493090	2	25303772	a	g	0.4476	-0.055	0.0076	5.961e-13	------------+-------++------	0.8662	39618
rs7316688	12	50240341	c	g	0.4455	0.055	0.0077	6.494e-13	++++-+--++++-++++--+++++++-+	0.1524	39618.1
rs483428	2	25305136	t	c	0.4474	-0.0548	0.0076	6.871e-13	------------+-------++------	0.8594	39618
rs487617	2	25309756	c	g	0.5522	0.0547	0.0076	7.029e-13	++++++++++++-+++++++--++++++	0.8593	39618
rs7313400	12	50204089	a	g	0.3896	0.0564	0.0079	7.911e-13	++++++-+++++-++?+?-+++++++++	0.4355	38693
rs7316671	12	50240304	a	g	0.446	0.0548	0.0077	8.102e-13	++++-+--++++-++++--+++++++-+	0.138	39618
rs4477562	13	54104968	t	c	0.1334	0.0802	0.0112	8.288e-13	++++++++-+++++-+++++++++++++	0.302	39618
rs2720291	12	50197385	a	g	0.3776	0.058	0.0081	8.412e-13	++++++-+++++-++???-+++++++++	0.2872	37235
rs693232	1	177881651	c	g	0.8044	-0.0686	0.0096	8.886e-13	------------+--?-?----+---+-	0.2057	38693
rs10789396	1	75014362	t	c	0.444	0.057	0.008	8.887e-13	++++++-+++-++++?+?++++++++-+	0.8507	38693
rs11169161	12	50206201	a	t	0.5866	-0.0551	0.0077	8.934e-13	-+----------+-----+---------	0.5614	39618
rs6669189	1	75011358	t	c	0.4188	0.0562	0.0079	9.371e-13	++++++--+--++++?+?++++++++-+	0.6058	38693
rs6695685	1	74998501	a	g	0.4184	0.0553	0.0078	9.925e-13	++++++--+--+++++++++++++++-+	0.6685	39618
rs9568867	13	54107352	a	g	0.1337	0.0799	0.0112	1.048e-12	++++++++-+++++-+++++++++++++	0.3412	39617.9
rs9568868	13	54107583	t	g	0.1337	0.0799	0.0112	1.054e-12	++++++++-+++++-+++++++++++++	0.3404	39618
rs480319	2	25318522	a	g	0.4484	-0.0547	0.0077	1.076e-12	------------+-------++------	0.7496	39618
rs1927861	13	54091759	t	c	0.1339	0.0801	0.0112	1.102e-12	++++++++-+++++-+++++++++++++	0.2955	39618
rs3765681	1	75007444	a	g	0.4184	0.0559	0.0079	1.104e-12	++++++--+--++++?+?++++++++-+	0.5117	38693
rs6604866	1	74992546	c	g	0.5429	-0.0553	0.0078	1.112e-12	------+---+----?-?---?--?-+-	0.8038	37743
rs670323	1	177868990	a	g	0.1956	0.0682	0.0096	1.168e-12	++++++++++++-++?+?++++-+++-+	0.2182	38693
rs73116339	12	50289667	a	g	0.3101	0.0617	0.0087	1.191e-12	++++++++++++-+++?+-+++++-+++	0.6652	38160
rs2603110	12	50199316	c	g	0.4119	0.0555	0.0078	1.21e-12	++++++++++++-++?+?-+++++++++	0.5546	38693
rs527248	1	177875514	a	g	0.8051	-0.0681	0.0096	1.218e-12	------------+--?-?----+---+-	0.211	38693
rs11210478	1	75008411	a	g	0.5795	-0.0554	0.0078	1.253e-12	------++-++----?-?--------+-	0.5518	38693
rs10875969	12	50206723	a	g	0.4152	0.0538	0.0076	1.276e-12	+-++++++++++-+++++-+++++++++	0.6146	39724
rs73116338	12	50289657	t	c	0.6893	-0.0616	0.0087	1.299e-12	------------+---?-+-----+---	0.6492	38160
rs490689	1	177873841	a	g	0.1949	0.068	0.0096	1.33e-12	++++++++++++-++?+?++++-+++-+	0.2116	38693.1
rs574367	1	177873210	t	g	0.195	0.068	0.0096	1.34e-12	++++++++++++-++?+?++++-+++-+	0.2123	38693.1
rs3765680	1	75007008	a	g	0.5785	-0.0553	0.0078	1.357e-12	------++-++----?-?--------+-	0.5386	38693
rs72805612	16	53834608	a	g	0.3943	0.0565	0.008	1.419e-12	++++-+---+-+++-+?++-++++++++	0.003112	38160
rs6604871	1	75008008	t	c	0.5797	-0.0553	0.0078	1.431e-12	------++-++----?-?--------+-	0.5548	38693
rs7188250	16	53834607	t	c	0.6033	-0.0564	0.008	1.433e-12	----+-+++-+---+-?--+--------	0.002871	38160
rs571567	1	177872905	a	g	0.1952	0.0679	0.0096	1.437e-12	++++++++++++-++?+?++++-+++-+	0.2048	38693
rs3894212	1	75001683	t	g	0.5792	-0.0552	0.0078	1.475e-12	------++-++----?-?--------+-	0.5287	38693
rs589500	1	177876946	t	c	0.1954	0.0678	0.0096	1.514e-12	++++++++++++-++?+?++++-+++-+	0.209	38692.9
rs2076308	6	50791640	c	g	0.1874	0.0697	0.0099	1.585e-12	++++-+-++--++++?+?-+++++++-+	0.4276	38693
rs1077498	12	50195390	a	g	0.6091	-0.0565	0.008	1.705e-12	------+-----+--???+---------	0.4712	37235
rs2603104	12	50189834	t	g	0.5871	-0.0551	0.0078	1.716e-12	------------+--?-?+---------	0.6078	38693
rs7305229	12	50260264	t	c	0.4477	0.0553	0.0078	1.727e-12	++++-+-+++++-+++?--+++++++-+	0.1925	38160
rs1075366	12	50192009	t	c	0.5863	-0.055	0.0078	1.906e-12	------------+--?-?+---------	0.6201	38693
rs7488361	12	50182265	t	c	0.5863	-0.0555	0.0079	1.924e-12	-+----------+---?-+---------	0.6657	38160
rs2603111	12	50199846	t	c	0.4134	0.0549	0.0078	1.997e-12	+-++++++++++-++?+?-+++++++++	0.5745	38693
rs2720298	12	50189807	a	c	0.3896	0.0564	0.008	2.03e-12	++++++-+++++-++???-+++++++++	0.4714	37235
rs6698622	1	74997956	a	g	0.42	0.0548	0.0078	2.072e-12	++++++--+--++++?+?++++++++-+	0.5977	38693
rs6703637	1	74997795	a	t	0.4193	0.055	0.0078	2.135e-12	++++++--+--++++?+?++++++++-+	0.5876	38693
rs12568287	1	75003812	t	c	0.5792	-0.0548	0.0078	2.139e-12	------++-++----?-?--------+-	0.543	38693
rs6698760	1	74997803	a	g	0.4192	0.055	0.0078	2.141e-12	++++++--+--++++?+?++++++++-+	0.5873	38693
rs729281	12	50196394	t	c	0.6073	-0.0553	0.0079	2.22e-12	------+-----+--???+---------	0.5576	37342
rs3798519	6	50788778	a	c	0.8137	-0.0692	0.0099	2.302e-12	----+-+--++----?-?+-------+-	0.4704	38693
rs59046026	12	50208261	t	c	0.3126	0.0586	0.0084	2.322e-12	++++++-+++++-+++?+++++-+++++	0.1055	38160
rs510107	2	25319471	a	g	0.4501	-0.0535	0.0076	2.462e-12	------------+-------++------	0.8755	39618
rs3843261	1	75000726	c	g	0.4197	0.0546	0.0078	2.508e-12	++++++--+--++++?+?++++++++-+	0.5527	38693
rs11210477	1	75005363	a	g	0.4198	0.0546	0.0078	2.529e-12	++++++--+--++++?+?++++++++-+	0.5521	38693
rs7133995	12	50253515	a	g	0.3865	-0.0553	0.0079	2.564e-12	--+---------+---?---------+-	0.3413	38160
rs79541760	6	50930848	a	t	0.825	-0.0702	0.01	2.607e-12	------+--++------+--------+-	0.3459	39618
rs630372	1	177885762	a	g	0.2191	0.0629	0.009	2.692e-12	+-++++++++++-+++++++++-+++++	0.1699	39722
rs4898530	12	50204709	a	g	0.585	-0.0545	0.0078	2.775e-12	-+----------+--?-?+---------	0.5513	38693
rs9937521	16	53799296	t	c	0.3879	0.0571	0.0082	3.037e-12	++++-+---+-+-+-+?++++++-++-+	0.001662	38160
rs7977112	12	50209618	t	c	0.4129	0.0544	0.0078	3.077e-12	+-++++++++++-++?+?-+++++++++	0.5332	38693
rs3798526	6	50809787	a	g	0.8141	-0.0689	0.0099	3.124e-12	----+-+--++----?-?+-------+-	0.4632	38692.9
rs4711965	6	50937412	a	t	0.1746	0.0708	0.0101	3.124e-12	++++++-++--++++?+?++++++++-+	0.2935	38693
rs2290442	12	50185334	a	g	0.583	-0.0557	0.008	3.237e-12	-+--------+-+--???+---------	0.5688	37235.1
rs62407779	6	50890084	t	c	0.1747	0.0693	0.01	3.341e-12	++++++-++--++++++--+++++++-+	0.3009	39617.9
rs62407774	6	50880604	t	c	0.8252	-0.0692	0.01	3.585e-12	------+--++------++-------+-	0.325	39618
rs3857599	6	50938247	a	c	0.1751	0.0696	0.01	3.672e-12	++++++-++--++++++-++++++++-+	0.2953	39618
rs1514173	1	74995110	t	c	0.4188	0.0543	0.0078	3.705e-12	++++++--+--++++?+?++++++++-+	0.6299	38693
rs72891717	6	50858235	a	t	0.1778	0.0699	0.0101	3.759e-12	++++++-++--++++?+?-+++++++-+	0.3054	38693
rs3857596	6	50905067	t	c	0.175	0.069	0.0099	4.056e-12	++++++-++--++++++--+++++++-+	0.3113	39618
rs1928185	6	50935513	t	c	0.826	-0.0705	0.0102	4.059e-12	------+--++----?-?--------+-	0.2626	38693.1
rs6925404	6	50905650	c	g	0.825	-0.069	0.0099	4.062e-12	------+--++------++-------+-	0.3112	39617.9
rs478788	1	177887018	t	c	0.7805	-0.0632	0.0091	4.122e-12	------------+---------+-----	0.1509	39618
rs7953534	12	50197880	a	g	0.3135	0.0583	0.0084	4.138e-12	++++++-+++++-++???++++-+++++	0.08858	37235
rs11611070	12	50199474	t	c	0.688	-0.0575	0.0083	4.492e-12	------+-----+---?+----+-----	0.09859	38160.1
rs77891659	6	50893652	a	g	0.1738	0.0699	0.0101	4.628e-12	++++++-++--++++?+?-+++++++-+	0.3099	38693
rs73114127	12	50205502	a	g	0.6856	-0.0575	0.0083	4.753e-12	------+-----+---?-----+-----	0.1297	38160
rs145101485	6	50886236	a	g	0.1756	0.0688	0.01	4.954e-12	++++++-++--++++++--+++++++-+	0.3302	39618
rs12529728	6	50896630	a	g	0.8259	-0.0696	0.0101	4.961e-12	------+--++----?-?+-------+-	0.2921	38692.9
rs734597	6	50836279	a	g	0.1745	0.0688	0.01	4.969e-12	++++++-++--++++++--+++++++-+	0.3256	39618
rs12524834	6	50893443	t	c	0.1741	0.0696	0.0101	5.045e-12	++++++-++--++++?+?-+++++++-+	0.2938	38693
rs16880854	6	50904881	a	g	0.1742	0.0695	0.0101	5.168e-12	++++++-++--++++?+?-+++++++-+	0.299	38692.9
rs62407801	6	50910282	t	g	0.8258	-0.0696	0.0101	5.227e-12	------+--++----?-?+-------+-	0.3009	38693
rs4715213	6	50911091	t	c	0.1742	0.0696	0.0101	5.266e-12	++++++-++--++++?+?-+++++++-+	0.3011	38693
rs72887147	6	50914348	t	c	0.1741	0.0697	0.0101	5.27e-12	++++++-++--++++?+?++++++++-+	0.3077	38693
rs3845345	1	75002667	t	g	0.4215	0.053	0.0077	5.362e-12	++++++--+--++++?+?++++++++-+	0.5122	38799
rs4711961	6	50833084	a	g	0.1745	0.0687	0.01	5.529e-12	++++++-++--++++++--+++++++-+	0.3256	39618
rs62407770	6	50873201	a	g	0.826	-0.0694	0.0101	5.752e-12	------+--++----?-?+-------+-	0.324	38692.9
rs62405443	6	50864335	a	g	0.826	-0.0694	0.0101	5.871e-12	------+--++----?-?+-------+-	0.3235	38692.9
rs943005	6	50865820	t	c	0.1744	0.0683	0.0099	5.877e-12	++++++-++--++++?+?-+++++++-+	0.3037	38799
rs62407804	6	50940677	a	g	0.175	0.07	0.0102	5.986e-12	++++++-++--++++++-++++++++-+	0.2781	39617.9
rs2207139	6	50845490	a	g	0.8264	-0.0695	0.0101	6.158e-12	------+--++----?-?+-------+-	0.3003	38692.9
rs987237	6	50803050	a	g	0.8148	-0.0684	0.01	6.462e-12	-?-??-+--+?-?----++-------+-	0.543	37069
rs62405437	6	50813729	t	c	0.815	-0.0679	0.0099	6.75e-12	----+-+--++----?-?+-------+-	0.5757	38692.9
rs10890130	1	75004875	t	g	0.4205	0.0527	0.0077	6.97e-12	++++++--+--++++?+?++++++++-+	0.5159	38798
rs62405439	6	50847486	a	c	0.1738	0.0692	0.0101	7.172e-12	++++++-++--++++?+?-+++++++-+	0.3295	38693
rs492393	2	25315511	a	g	0.4163	-0.0551	0.0081	7.475e-12	------------+---?----+------	0.7486	38159.9
rs1470909	12	50183966	t	c	0.5886	-0.0546	0.008	7.698e-12	-+----------+--???+---------	0.6214	37235
rs2954129	12	50183361	t	c	0.5884	-0.0545	0.008	7.999e-12	-+----------+--???+---------	0.6286	37235
rs62407775	6	50885581	a	g	0.84	-0.0732	0.0107	8.227e-12	----+-+--++-?----++-------+-	0.1394	38562
rs2603107	12	50183874	t	g	0.5884	-0.0545	0.008	8.471e-12	-+----------+--???+---------	0.6268	37235
rs10783320	12	50179928	t	c	0.5789	-0.0539	0.0079	8.669e-12	-+----------+---?-+---------	0.6971	38160
rs73114136	12	50211406	t	c	0.3118	0.0567	0.0083	9.539e-12	++++++-+++++-+++?+++++-+++++	0.08389	38160
rs7977000	12	50209530	c	g	0.6869	-0.0566	0.0083	9.706e-12	------+-----+---?-----+-----	0.1121	38159.9
rs73114137	12	50211574	a	c	0.3131	0.0566	0.0083	9.823e-12	++++++-+++++-+++?+++++-+++++	0.1122	38160
rs11649091	16	53845169	t	g	0.5658	-0.054	0.0079	1.035e-11	-+--+-+++-+---+-?+++--------	0.001966	38159.9
rs113468108	12	50213076	t	c	0.312	0.0566	0.0083	1.036e-11	++++++-+++++-+++?+++++-+++++	0.08375	38160
rs7978693	12	50197508	a	g	0.3124	0.0575	0.0085	1.041e-11	++++++-+++++-++???++++++++++	0.08827	37235
rs2797084	13	54071824	t	c	0.8549	-0.0744	0.0109	1.045e-11	--------------+-------------	0.2014	39618
rs11612227	12	50210364	t	c	0.3118	0.0565	0.0083	1.097e-11	++++++-+++++-+++?+++++-+++++	0.08137	38160
rs9568863	13	54082529	a	g	0.8598	-0.0749	0.011	1.137e-11	--------------+-------------	0.1054	39618
rs10172886	2	25111680	t	c	0.4677	-0.055	0.0081	1.138e-11	------++----+---?--+----+---	0.3043	38160
rs12142020	1	75000011	a	t	0.5797	-0.0535	0.0079	1.146e-11	------++-++----?-?---?--?-+-	0.568	37743
rs9568861	13	54079446	t	c	0.141	0.0748	0.011	1.149e-11	++++++++++++++-+++++++++++++	0.1383	39618.1
rs2027542	13	54074825	t	g	0.8557	-0.0742	0.0109	1.197e-11	--------------+-------------	0.1967	39618.1
rs112405055	12	50182494	t	c	0.321	0.0564	0.0083	1.332e-11	++++++-+++++-+++?-+++-0+++++	0.2096	38160
rs9568859	13	54076184	a	g	0.8589	-0.0746	0.011	1.367e-11	--------------+-------------	0.1519	39618
rs2720301	12	50180450	t	c	0.6781	-0.0562	0.0083	1.437e-11	------+-----+---?+---+------	0.2243	38160
rs1514176	1	74991596	a	g	0.5624	-0.0521	0.0077	1.44e-11	------+---+----?-?--------+-	0.8636	38693
rs10493544	1	74983835	t	c	0.4575	0.0521	0.0077	1.492e-11	+-++++-+++-++++???++++++++-+	0.9116	37338
rs516636	1	177855517	a	c	0.1969	0.0661	0.0098	1.572e-11	++++++++++++-?+?+?++++-+++-+	0.2641	37118
rs12429545	13	54102206	a	g	0.1337	0.0771	0.0114	1.579e-11	+?+??+++-+?+?+-+++++++++++++	0.1997	37066
rs1514177	1	74991402	c	g	0.4367	0.052	0.0077	1.6e-11	++++++-+++-++++?+?++++++++-+	0.862	38693
rs4883723	13	54084032	a	g	0.1436	0.0724	0.0108	1.919e-11	++++++++++++++-+++++++++++++	0.1572	39718
rs10875972	12	50210535	a	g	0.336	0.0547	0.0082	2.159e-11	++++++-+++++-+++?+-+++-+++++	0.1686	38160
rs6904450	6	50921602	a	t	0.8203	-0.0671	0.01	2.217e-11	------+--++----?-?+-------+-	0.4398	38693
rs4075681	12	50214637	t	c	0.3137	0.0554	0.0083	2.631e-11	++++++-+++++-+++?++++--+++++	0.07033	38160
rs897054	12	50213254	t	c	0.593	0.0525	0.0079	2.718e-11	+-++++++++-+-+++?+++++++++-+	0.4884	38160
rs2094510	1	177843479	t	c	0.1973	0.0637	0.0096	2.774e-11	+-+-++++++++-+++++++++-+++-+	0.1887	39618
rs2720296	12	50169070	a	g	0.4223	0.0541	0.0081	2.799e-11	+-++++++++-+-++???-+++++++++	0.8105	37235
rs4488285	12	50212396	a	t	0.3587	0.0525	0.0079	3.074e-11	+-++++-+++++-+++++-+++++++++	0.2868	39618
rs11615911	12	50212920	t	c	0.6411	-0.0525	0.0079	3.093e-11	-+----+-----+-----+---+-----	0.286	39618
rs6736052	2	25153918	a	g	0.2165	0.0626	0.0094	3.099e-11	+++++++---++-+++?+++++-+-+++	0.6635	38160
rs4715211	6	50900400	a	g	0.1676	0.0682	0.0103	3.19e-11	++++++-++--++++++--+++++++-+	0.2243	39618
rs7566023	2	25151872	a	g	0.7832	-0.0628	0.0095	3.268e-11	-------+++--+---?-----+-+---	0.6383	38160
rs28562191	16	53799303	t	c	0.3803	0.0548	0.0083	3.315e-11	++++-+---+-+-+-+?+++++++++++	0.005659	38160
rs4558547	2	25154587	a	g	0.783	-0.0625	0.0094	3.333e-11	-------+++--+---?-----+-+---	0.654	38159.9
rs59766494	12	50206977	t	c	0.6412	-0.0522	0.0079	3.475e-11	-+----+-----+-----+---+-----	0.2787	39617.9
rs2867129	2	618851	c	g	0.3551	-0.0526	0.0079	3.476e-11	-+----------+-------+?--?-+-	0.6031	38668
rs10875970	12	50207360	a	g	0.6419	-0.0523	0.0079	3.51e-11	-+----+-----+-----+---------	0.2875	39618
rs2867130	2	618802	t	c	0.3548	-0.052	0.0078	3.558e-11	-+----------+-------++----+-	0.6655	39618
rs62405438	6	50815314	a	t	0.1903	0.0648	0.0098	3.595e-11	++++-+-++--++++?+?-+++++++-+	0.5404	38693
rs1514175	1	74991644	a	g	0.438	0.0517	0.0078	3.829e-11	+?+??+-+++?+?+++++++++++++-+	0.8758	37067
rs4715210	6	50897251	t	c	0.175	0.0661	0.01	4.287e-11	++++++-++--++++?+?-++?++?+-+	0.3652	37850
rs1040070	1	74977870	c	g	0.5427	-0.0525	0.008	4.294e-11	-+----+---+----???---?--?-+-	0.9044	36285
rs72892910	6	50816887	t	g	0.1837	0.0665	0.0101	4.307e-11	++++-+-++-+++++?+?-++?++?+-+	0.7158	37743
rs112665992	12	50196281	t	c	0.2987	0.0564	0.0086	4.398e-11	++++++-+++++-+++?-+++--+++++	0.04611	38160.1
rs73114141	12	50213813	a	g	0.3126	0.056	0.0085	4.543e-11	++++++-+++++-++???+++?-+?+++	0.07672	36285
rs2603105	12	50188434	a	t	0.333	0.0542	0.0082	4.543e-11	++++++-+++++-+++?-+++--+++++	0.1747	38160
rs10188118	2	653623	c	g	0.6916	0.0552	0.0084	4.791e-11	++++-++++++++++?+?+---++++++	0.6408	38693.1
rs751675	12	50202420	t	c	0.3311	0.0538	0.0082	4.9e-11	+-++-+-+++++-++?+?++++++++++	0.2227	38692.9
rs2603112	12	50199949	a	g	0.6411	-0.0515	0.0079	5.23e-11	-+----+-----+--?-?+---------	0.4085	38800
rs72887130	6	50902701	a	t	0.8253	-0.0668	0.0102	5.251e-11	------+--++----?-?+--?--?-+-	0.3914	37742.9
rs1075847	6	50836776	a	t	0.825	-0.0661	0.0101	5.283e-11	------+--++------++--?--?-+-	0.4276	38667.9
rs4854268	2	617048	a	t	0.6447	0.0515	0.0078	5.309e-11	+-++++++++++-+++++++--++++-+	0.6522	39618
rs16880869	6	50908992	t	c	0.8253	-0.0668	0.0102	5.375e-11	------+--++----?-?+--?--?-+-	0.3881	37743
rs62405422	6	50796905	t	c	0.8136	-0.0653	0.01	5.673e-11	----+-+--++----?-?+--?--?-+-	0.7407	37742.9
rs1077499	12	50195277	a	t	0.6021	-0.0524	0.008	5.782e-11	------+-----+--???+--+--+---	0.1613	37235
rs59989839	2	25159533	t	c	0.3143	0.0549	0.0084	6.082e-11	+++++++-+-++-+++?+++---+-+++	0.1385	38160
rs6738297	2	25159372	a	g	0.3143	0.0549	0.0084	6.154e-11	+++++++-+-++-+++?+++---+-+++	0.1242	38160.1
rs10875976	12	50226467	a	g	0.4734	0.0506	0.0077	6.251e-11	++++++++++++-+-+?+++++++++-+	0.2896	38160
rs7953539	12	50227988	a	g	0.473	0.0505	0.0077	6.494e-11	++++++++++++-+-+?+++++++++-+	0.3021	38160
rs66924167	12	50205694	c	g	0.3602	0.052	0.008	6.813e-11	+-++++-+++++-++?+?-+++++++++	0.2778	38693
rs4715207	6	50809278	t	c	0.1861	0.0651	0.01	6.94e-11	++++-+-++--++++?+?-++?++?+-+	0.7506	37743
rs2720287	12	50201448	t	c	0.6424	-0.0519	0.008	7.191e-11	-+----+-----+--?-?+---------	0.335	38693.1
rs11169167	12	50216801	t	c	0.4146	-0.0514	0.0079	7.628e-11	-+----------+--???--------+-	0.4246	37235
rs1031476	12	50218433	a	g	0.4083	-0.0516	0.0079	8.032e-11	-+--------+-+--???--------+-	0.4058	37234.9
rs66721590	12	50205712	a	g	0.3586	0.0517	0.008	8.412e-11	+-++++-+++++-++?+?-+++-+++++	0.2602	38693
rs585944	1	177882786	t	c	0.2181	0.0598	0.0092	8.54e-11	+-++++++++++-++?+?++++-+++++	0.3321	38693
rs7313563	12	50204337	a	c	0.3584	0.0517	0.008	8.838e-11	+-++++-+++++-++?+?-+++++++++	0.2942	38693
rs9568856	13	54064981	a	g	0.1365	0.0734	0.0113	9.266e-11	++++++++++++++-+++++++++++++	0.2432	39618
rs6749646	2	25193998	a	t	0.7996	-0.064	0.0099	9.782e-11	-+-+--+---+-+---?-----------	0.8078	38160
rs2867133	2	607107	t	c	0.3518	-0.0506	0.0078	9.83e-11	-+----------+--?-?--++------	0.5544	38796
rs28445639	2	25182488	t	c	0.1967	0.0642	0.01	1.148e-10	+++-++-+++-+-+++?+++++++++++	0.6738	38160
rs11169170	12	50223013	t	c	0.4714	0.0504	0.0078	1.192e-10	++++++++++++-+-???++++++++-+	0.2168	37235
rs60062868	12	50206919	a	g	0.6429	-0.0513	0.008	1.234e-10	-+----+-----+--?-?+---+-----	0.2538	38693
rs1975732	12	50257946	t	c	0.6568	0.051	0.0079	1.336e-10	++++++++++++++++?--+++++++-+	0.234	38266
rs7199285	16	19980931	t	c	0.1854	-0.0647	0.0101	1.34e-10	---+---+----+--?-?---?--?---	0.9944	37743
rs114285994	16	19935763	a	g	0.129	-0.0737	0.0115	1.409e-10	-------+----+--------?--?---	0.9985	38668
rs2720302	12	50179021	a	g	0.3383	0.0527	0.0082	1.458e-10	++++-+-+++++-+++?++++-++++++	0.2281	38160
rs1336780	1	177864136	a	t	0.7456	-0.0554	0.0087	1.62e-10	----+----------+--+-----+-+-	0.8625	39618
rs11611168	12	50203166	t	c	0.3476	0.0512	0.008	1.703e-10	+-++++-+++-+-++?+?-+++-+++++	0.169	38692.9
rs2867126	2	618973	a	t	0.6442	0.0506	0.0079	1.765e-10	+-++++++++++-++?+?++--++++-+	0.7641	38692.9
rs13388020	2	25196266	c	g	0.1968	0.0634	0.01	1.825e-10	+-++++-+++-+-+++?+++++++++++	0.6831	38160.1
rs13401333	2	25373031	t	c	0.6213	0.0497	0.0078	1.892e-10	++++++++++++-+++--++++++++++	0.9566	39617.9
rs13428823	2	25373298	a	g	0.6195	0.0496	0.0078	1.926e-10	++++++++++++-+++--+++?++?+++	0.9295	38773
rs571312	18	57839769	a	c	0.2266	0.059	0.0093	1.996e-10	+?+??++-++?+?++-++-+-+++++++	0.0941	37068
rs56133711	11	27723334	a	g	0.2424	0.0566	0.0089	2.001e-10	+-+-++-+++++++++?+++++++++++	0.6155	38160
rs76286777	2	25195577	t	c	0.8026	-0.0632	0.0099	2.048e-10	-+----+---+-+---?-----------	0.7114	38159.9
rs76629501	2	25233822	c	g	0.8025	-0.0634	0.01	2.1e-10	----------+-+---?-----------	0.7981	38160.1
rs2603116	12	50179630	t	c	0.6408	-0.0514	0.0081	2.165e-10	------+-----+---?-----------	0.3069	38160
rs4898534	12	50231025	a	g	0.5268	-0.0497	0.0078	2.201e-10	------+-----+-+???--------+-	0.239	37235
rs2206277	6	50798526	t	c	0.186	0.0659	0.0104	2.324e-10	+?+??+-++-?+?++?+?-++?++?+-+	0.8548	35088
rs9805137	12	50259062	a	t	0.672	0.0515	0.0081	2.436e-10	++++-+++++++++++?+-+++++++-+	0.2836	38160
rs10783326	12	50259144	a	g	0.6715	0.0515	0.0081	2.442e-10	++++-+++++++++++?+-+++++++-+	0.2811	38160
rs78285703	2	558281	a	g	0.9267	0.0936	0.0148	2.468e-10	++++++++++-+++++++++++++++++	0.3009	39618
rs11500197	11	27707409	a	g	0.2428	0.0553	0.0088	2.697e-10	+-+-++-+++++++++++++++++++++	0.5767	39618
rs75421120	2	25200085	a	g	0.1945	0.0631	0.01	2.718e-10	+-++++-+++-+-+++?+++++++++++	0.6187	38160
rs4854332	2	618027	t	c	0.3553	-0.05	0.0079	2.76e-10	-+----------+--?-?--++----+-	0.7767	38693
rs6656785	1	75005776	a	g	0.6057	-0.0496	0.0079	2.766e-10	------++-++----?-?--------+-	0.6581	38693
rs7973894	12	50233256	a	g	0.4741	0.0495	0.0078	2.778e-10	++++++-+++++-+-???++++++++-+	0.2301	37235
rs7565774	2	605695	a	c	0.353	-0.051	0.0081	2.8e-10	-+----------+--???--++------	0.5654	37235
rs1866146	2	25380573	a	g	0.6284	0.0491	0.0078	2.871e-10	++++++++++-+-+++-+++++++++++	0.8934	39725
rs56059808	2	554643	a	g	0.0742	-0.0921	0.0146	2.941e-10	----------+-----------------	0.3472	39618
rs112991346	16	19967668	t	c	0.8621	0.0694	0.011	2.971e-10	+++-+++-++++-+++++++++++-+++	0.9373	39617.9
rs59979714	2	25283747	t	c	0.1989	0.0627	0.01	2.975e-10	++++++++++-+-+++?+++++++++++	0.8819	38160
rs3795955	2	25375105	t	c	0.3551	-0.05	0.0079	3.01e-10	----------+-+---------------	0.9897	39618
rs11169162	12	50207126	t	c	0.6407	-0.0507	0.008	3.014e-10	-+----+-----+--?-?---?+-?---	0.1776	37743
rs2271687	12	50259515	c	g	0.6694	0.0513	0.0081	3.038e-10	++++-+++++++++++?+-+++++++-+	0.2876	38160
rs2271688	12	50259529	a	c	0.3306	-0.0512	0.0081	3.095e-10	----+-----------?-+-------+-	0.2885	38160
rs11169163	12	50208343	a	g	0.6633	-0.0518	0.0082	3.309e-10	------+-----+--???----+-----	0.1521	37235.1
rs1865687	2	25112885	a	g	0.3506	0.049	0.0078	3.372e-10	++++-+++-+++-++++-+-++++-+++	0.1593	39724
rs3741557	12	50258325	t	g	0.3303	-0.051	0.0081	3.407e-10	----+-----------?-+-------+-	0.2871	38160
rs4318419	2	613154	t	c	0.6456	0.0498	0.0079	3.452e-10	+-++++++++++-++?+?++--++++-+	0.7739	38693
rs4898532	12	50223579	t	c	0.5425	-0.0494	0.0079	3.515e-10	------+-----+-+???--------+-	0.1663	37235
rs3845344	1	75001480	t	c	0.3955	0.0481	0.0077	3.588e-10	++++++--+--+++++++++++++++-+	0.7113	39724
rs13414109	2	553986	a	c	0.9255	0.0912	0.0146	3.639e-10	++++++++++-+++++++++++++++++	0.3512	39618
rs56386733	2	25278829	c	g	0.1982	0.0624	0.01	3.722e-10	++++++++++-+-+++?+++++++++++	0.8882	38160
rs58378369	2	554496	a	g	0.9255	0.0912	0.0146	3.725e-10	++++++++++-+++++++++++++++++	0.349	39618
rs3741558	12	50258205	a	g	0.6691	0.0509	0.0081	3.782e-10	++++-+++++++++++?+-+++++++-+	0.2928	38160
rs7310206	12	50251109	a	g	0.3478	-0.0504	0.008	3.788e-10	--+-+-----------?++-------+-	0.2261	38160
rs6716401	2	555107	a	g	0.0743	-0.0912	0.0146	3.808e-10	----------+-----------------	0.3424	39618.1
rs4332953	2	553113	a	g	0.0745	-0.0912	0.0146	3.814e-10	----------+-----------------	0.361	39618
rs56325302	2	555814	t	c	0.9255	0.0912	0.0146	3.82e-10	++++++++++-+++++++++++++++++	0.3464	39618.1
rs6670873	1	177841685	t	c	0.2011	0.0603	0.0096	3.826e-10	+-+-++++++++-++?+?++++-+-+-+	0.1565	38693
rs10186386	2	555510	a	g	0.0745	-0.0911	0.0146	3.83e-10	----------+-----------------	0.3466	39618
rs56046241	2	557624	a	g	0.0744	-0.0911	0.0146	3.923e-10	----------+-----------------	0.3439	39618
rs60942644	2	556653	t	c	0.0745	-0.0911	0.0146	3.957e-10	----------+-----------------	0.3447	39618
rs73146390	2	556792	t	c	0.9255	0.0911	0.0146	3.957e-10	++++++++++-+++++++++++++++++	0.3443	39618
rs56358124	2	556664	t	c	0.0745	-0.0911	0.0146	3.959e-10	----------+-----------------	0.3448	39618
rs56355782	2	556824	t	c	0.9255	0.0911	0.0146	3.961e-10	++++++++++-+++++++++++++++++	0.3443	39618
rs73910241	2	556797	t	c	0.0745	-0.0911	0.0146	3.961e-10	----------+-----------------	0.3444	39618
rs73146386	2	556006	a	g	0.9255	0.0911	0.0146	3.972e-10	++++++++++-+++++++++++++++++	0.3451	39618.1
rs73146388	2	556179	a	g	0.0745	-0.0911	0.0146	3.973e-10	----------+-----------------	0.345	39618
rs10206492	2	557073	a	g	0.9256	0.0911	0.0146	3.98e-10	++++++++++-+++++++++++++++++	0.3437	39618
rs10206496	2	557099	a	g	0.9256	0.091	0.0146	3.984e-10	++++++++++-+++++++++++++++++	0.3438	39618
rs10209543	2	557205	t	c	0.9256	0.091	0.0146	3.986e-10	++++++++++-+++++++++++++++++	0.3439	39617.9
rs10201828	2	557069	a	c	0.0744	-0.091	0.0146	3.988e-10	----------+-----------------	0.3439	39618
rs10209658	2	557322	t	c	0.9255	0.091	0.0146	3.994e-10	++++++++++-+++++++++++++++++	0.3434	39618
rs17042013	2	556088	t	c	0.9255	0.091	0.0146	4.008e-10	++++++++++-+++++++++++++++++	0.3444	39618
rs4332952	2	552959	c	g	0.0745	-0.091	0.0146	4.037e-10	----------+-----------------	0.3598	39618
rs3923528	2	552833	a	g	0.9255	0.091	0.0146	4.08e-10	++++++++++-+++++++++++++++++	0.3596	39618
rs2903495	2	613290	t	g	0.355	-0.0495	0.0079	4.104e-10	-+----------+--?-?--++----+-	0.7696	38693
rs1573989	2	555394	t	c	0.0745	-0.091	0.0146	4.116e-10	----------+-----------------	0.345	39618
rs4854269	2	617190	c	g	0.3715	-0.0492	0.0079	4.164e-10	-+----------+-------++----+-	0.7298	39618
rs6548236	2	615218	t	c	0.6447	0.0495	0.0079	4.165e-10	+-++++++++++-++?+?++--++++-+	0.7648	38693
rs7586879	2	25116977	t	c	0.3508	0.0509	0.0082	4.168e-10	+++??+++-+?+?++++-+-++++-+++	0.517	37506
rs67723963	12	50258542	t	g	0.6626	0.0509	0.0082	4.168e-10	++++++++++++++++?+-+++++++-+	0.2575	38160
rs10783323	12	50254148	t	c	0.6705	0.0507	0.0081	4.227e-10	++++-+++++++++++?+-+++++++-+	0.2932	38160
rs1563168	12	50257547	c	g	0.6668	0.0509	0.0082	4.291e-10	++++-+++++++++++?+-+++++++-+	0.326	38159.9
rs13411762	2	554109	t	c	0.0745	-0.0898	0.0144	4.318e-10	----------+-----------------	0.3352	39718
rs2966403	2	613571	t	c	0.3556	-0.0494	0.0079	4.481e-10	-+----------+--?-?--+0----+-	0.7832	38693
rs11642841	16	53845487	a	c	0.394	0.0511	0.0082	4.68e-10	+-++-----+-+++-+?-+-++++++++	0.001021	38160
rs7563834	2	25366080	a	g	0.6054	0.0487	0.0078	4.747e-10	++++++++++++-+++-+++++++++++	0.8	39618
rs61888800	11	27722278	t	g	0.2421	0.0561	0.009	4.754e-10	+-+-++-++++++++???++++++++++	0.5102	37235
rs7954572	12	50252915	a	g	0.6709	0.0506	0.0081	4.831e-10	++++-+++++++++++?+-+++++++-+	0.2895	38160
rs7969178	12	50252802	t	c	0.3291	-0.0505	0.0081	4.888e-10	----+-----------?-+-------+-	0.2897	38160
rs4898535	12	50231057	t	g	0.5367	-0.0493	0.0079	4.958e-10	------+-----+-+???----------	0.2919	37235
rs148965598	16	19975731	a	g	0.8735	0.0716	0.0115	4.985e-10	+++-+++-++++-+++++++++++-+++	0.9832	39618
rs8057044	16	53812614	a	g	0.4704	0.0477	0.0077	5.09e-10	++++-+---+++-+-?+?+++++-++++	0.003097	38693
rs2903493	2	618966	t	c	0.6432	0.0505	0.0081	5.129e-10	+-++++++++++-++?++++-??+?+-+	0.6318	36661
rs73135433	2	558650	c	g	0.9254	0.0905	0.0146	5.174e-10	++++++++++-+++++++++++++++++	0.3275	39618
rs59155397	2	556229	t	c	0.0744	-0.0914	0.0147	5.214e-10	----------+----------?--?---	0.2614	38668
rs10192669	2	557123	t	g	0.0744	-0.0914	0.0147	5.265e-10	----------+----------?--?---	0.2606	38668
rs7295882	12	50251066	t	c	0.3292	-0.0504	0.0081	5.288e-10	----+-----------?-+-------+-	0.2976	38160
rs7306374	12	50250389	t	c	0.6708	0.0503	0.0081	5.638e-10	++++-+++++++++++?+-+++++++-+	0.2914	38160
rs7309919	12	50250815	t	c	0.6708	0.0503	0.0081	5.711e-10	++++-+++++++++++?+-+++++++-+	0.2903	38160
rs2966402	2	613782	t	c	0.3547	-0.0485	0.0078	5.716e-10	-+----------+--?-?--++----+-	0.7668	38798
rs11683212	2	25120196	t	c	0.6511	-0.0491	0.0079	5.754e-10	----+---+---+----+-+----+---	0.2029	39618
rs11688665	2	25121168	t	g	0.3515	0.0496	0.008	5.776e-10	++++-+++-+++-++++-+-+?++?+++	0.1633	38668
rs17309874	11	27667236	a	g	0.2501	0.0547	0.0088	5.847e-10	+-++++-++++++++?+?-++++++-++	0.5985	38693.1
rs73135425	2	558323	t	c	0.0748	-0.0901	0.0146	5.928e-10	----------+-----------------	0.3322	39618.1
rs77657999	2	558286	t	c	0.9252	0.0901	0.0146	5.978e-10	++++++++++-+++++++++++++++++	0.332	39618.1
rs6740501	2	558749	t	c	0.0749	-0.0901	0.0146	5.988e-10	----------+-----------------	0.3321	39618.1
rs6732686	2	559197	a	g	0.0749	-0.0901	0.0146	6.024e-10	----------+-----------------	0.3315	39617.9
rs59902158	2	25253528	a	g	0.1965	0.0619	0.01	6.084e-10	+-++++++++-+-+++?+++++++++++	0.8293	38160
rs4898512	12	50246701	a	g	0.6671	0.0502	0.0081	6.274e-10	++++-+++++++++++?+-+++++++-+	0.3044	38160
rs9309308	2	24994570	t	c	0.7668	0.0554	0.009	6.308e-10	++++-++-++-+++--?+++++++++++	0.7214	38267
rs113953597	2	25445286	a	g	0.2161	-0.0597	0.0097	6.322e-10	---------+--+---?-----------	0.8782	38160
rs1869504	12	50241435	a	g	0.6703	0.0501	0.0081	6.39e-10	++++-+++++++++++?+-+++++++-+	0.3784	38159.9
rs6733854	2	554949	t	c	0.927	0.0916	0.0148	6.402e-10	++++++++++-+++++++++++++++++	0.3728	39618
rs2083389	2	24967724	t	c	0.7393	0.0542	0.0088	6.438e-10	+++++++-++-+++-+?+++++++-+++	0.5207	38160
rs12185581	2	25405507	t	c	0.8016	0.0603	0.0098	6.506e-10	++++-++++-++-+++?+++++++++++	0.8895	38160
rs6567160	18	57829135	t	c	0.7754	-0.0561	0.0091	6.608e-10	----+--+--+-++-+--+-+-------	0.1104	39618
rs10747567	12	50251120	t	c	0.3297	-0.0501	0.0081	6.66e-10	----+-----------?-+-------+-	0.2965	38160
rs10207698	2	25117672	t	c	0.3515	0.0494	0.008	6.662e-10	++++-+++-+++-++++-+-+?++?+++	0.1923	38668
rs7578764	2	618002	t	c	0.3557	-0.05	0.0081	6.731e-10	-+----------+-------+??-?-+-	0.7023	37035
rs62500888	8	28061823	a	g	0.5673	0.0472	0.0076	6.91e-10	+++--++-+-+++++++-+-+-++++++	0.8232	39618
rs17737058	2	24991569	c	g	0.7689	0.0562	0.0091	6.98e-10	++++-++-++-+++--?+-+++++++++	0.7337	38160.1
rs6736711	2	25116456	t	c	0.3504	0.0482	0.0078	7.015e-10	++++-+++-+++-++++-+-++++-+++	0.2064	39721
rs4077680	2	25122942	a	g	0.6483	-0.0493	0.008	7.082e-10	----+---+---+----+-+-?--?---	0.1561	38668
rs11685767	2	617394	a	g	0.3587	-0.05	0.0081	7.136e-10	-+----------+-------+??-?-+-	0.6928	37035
rs11643088	16	19969580	t	c	0.1347	-0.0687	0.0112	7.195e-10	-------+----+-----------+---	0.9184	39618
rs3911350	1	75014538	a	g	0.3797	0.0524	0.0085	7.284e-10	++++++--+--++++???++++++++-+	0.8983	37235
rs75707145	11	27739911	t	g	0.2446	0.0562	0.0091	7.299e-10	+-++++-+++++?+++?++++++++-++	0.5039	37104
rs10783321	12	50249603	t	c	0.6706	0.05	0.0081	7.311e-10	++++-+++++++++++?+-+++++++-+	0.3045	38160
rs56159942	2	25242274	a	g	0.1966	0.0616	0.01	7.531e-10	+-++++++++-+-+++?+++++++++++	0.8122	38160.1
rs35033157	2	25118020	t	c	0.648	-0.0492	0.008	7.631e-10	----+---+---+----+-+-?--?---	0.1647	38668
rs35746264	8	28062691	a	g	0.5676	0.047	0.0076	7.677e-10	+++--++-+-+++++++-+-+-++++++	0.8275	39618
rs12313488	12	49705661	a	g	0.7179	-0.053	0.0086	7.687e-10	------++--+-+----+--+---+---	0.3458	39617.9
rs6734834	2	25254735	t	g	0.8043	-0.0618	0.0101	7.794e-10	-+--------+-+---?-----------	0.8314	38159.9
rs6690871	1	74977277	a	g	0.5669	-0.049	0.008	7.821e-10	-+----++-++----???--+-----+-	0.7475	37235
rs7967564	12	50249531	a	g	0.6715	0.0499	0.0081	7.828e-10	++++-+++++++++++?+-+++++++-+	0.2983	38159.9
rs148451076	12	50182884	t	c	0.1338	0.0913	0.0149	7.837e-10	+++++++++?-+?+?+?--+++++++++	0.6509	35018
rs6265	11	27679916	t	c	0.1868	-0.0599	0.0097	7.867e-10	---??----+?-?+-----++-------	0.339	37612
rs6729395	2	558802	a	g	0.0748	-0.0904	0.0147	7.912e-10	----------+----------?--?---	0.2505	38668
rs6749825	2	558860	a	t	0.0748	-0.0904	0.0147	7.916e-10	----------+----------?--?---	0.2504	38667.9
rs11641335	16	19967822	t	c	0.1363	-0.0679	0.0111	8.158e-10	---+---+----+----+------+---	0.9243	39618
rs7821358	8	28060690	a	g	0.5677	0.047	0.0076	8.185e-10	+++--++-+-+++++++-+-+-++++++	0.7859	39617.9
rs35038967	11	27703480	a	t	0.2044	-0.0579	0.0094	8.207e-10	-------++++-++-?-?-++-------	0.3024	38692.9
rs8046312	16	19979334	a	c	0.8119	0.0592	0.0096	8.207e-10	+++-+++-++++-++-+++++-++-+++	0.9832	39720
rs16917237	11	27702383	t	g	0.2042	-0.0578	0.0094	8.425e-10	-------++++-++-?-?-++-------	0.3109	38693
rs10747568	12	50252470	a	g	0.3274	-0.0499	0.0081	8.465e-10	--+-+-----------?-+-------+-	0.2886	38160
rs138385919	11	27690566	t	g	0.7562	-0.0534	0.0087	8.642e-10	-+-+--+---------------------	0.6551	39618
rs11136036	8	28061310	t	c	0.4329	-0.0469	0.0076	8.643e-10	---++--+-+-------+-+-+------	0.8096	39618.1
rs8054082	16	19975418	t	c	0.1362	-0.0679	0.0111	8.644e-10	---+---+----+-----------+---	0.9336	39618
rs8054079	16	19975407	t	c	0.1362	-0.0679	0.0111	8.766e-10	---+---+----+-----------+---	0.9333	39618
rs4898513	12	50246773	a	c	0.6686	0.0499	0.0081	8.819e-10	++++-+++++++++++?+-+++++++-+	0.3028	38160
rs17782313	18	57851097	t	c	0.7722	-0.058	0.0095	9.326e-10	-?-??--+--?-?+-?-?+-+-------	0.1006	36038
rs79682290	2	25041566	a	g	0.2612	-0.0536	0.0088	9.58e-10	----+--+--+---+-?-+-----+---	0.8053	38160
rs13002549	2	25405527	t	c	0.7994	0.0592	0.0097	9.685e-10	++++-++++-++-+++?+++++++++++	0.9123	38160.1
rs4391887	12	50225250	a	g	0.3593	-0.049	0.008	9.777e-10	-+--------------?-+-------+-	0.6519	38160
rs10875984	12	50248043	a	t	0.6667	0.0496	0.0081	9.841e-10	++++-+++++++++++?+-+++++++-+	0.2441	38159.9
rs150469214	16	19929759	t	c	0.1271	-0.0696	0.0114	9.92e-10	---+---+----+-----------+---	0.943	39617.9
rs9938120	16	19977733	t	c	0.1371	-0.0677	0.0111	9.975e-10	---+---+----+-----------+---	0.9485	39618
rs17041285	2	614031	a	g	0.6442	0.0494	0.0081	1.003e-09	+-++++++++++-+++++++-??+?+-+	0.6985	37035
rs7137210	12	50250443	t	g	0.3311	-0.0496	0.0081	1.014e-09	----+-----------?-+-------+-	0.2419	38160
rs4854331	2	617621	a	g	0.6421	0.0485	0.0079	1.028e-09	+-++++++++++-++?+?++--++++-+	0.7885	38693
rs2206271	6	50786008	a	t	0.3042	0.051	0.0084	1.042e-09	++++++-++-+++++?+?--++++++++	0.4839	38693.1
rs2744475	6	50784880	c	g	0.6976	-0.051	0.0084	1.081e-09	------+--+-----?-?++--------	0.5528	38693
rs62140608	2	25070992	t	c	0.7374	0.0523	0.0086	1.085e-09	+++++++--+-++++-++-+++++++++	0.7515	39618
rs8059504	16	19975981	a	g	0.1362	-0.0675	0.0111	1.127e-09	---+---+----+-----------+---	0.9502	39618
rs17411738	8	28060572	t	g	0.5678	0.0466	0.0076	1.128e-09	+++--++-+-+++++++-+-+-++++++	0.7995	39617.9
rs13253111	8	28061974	a	g	0.5701	0.0465	0.0076	1.14e-09	+++--++-+-+++++++-+-+?++?+++	0.791	38774
rs73146394	2	558048	t	g	0.935	0.0973	0.016	1.152e-09	++++++++++-+++++++-+++++++-+	0.3626	39618
rs4290311	12	50229149	a	g	0.6401	0.0488	0.008	1.182e-09	+-++++++++++++++?+-+++++++-+	0.6346	38160
rs10871777	18	57851763	a	g	0.7717	-0.0568	0.0094	1.227e-09	-?-??--+--?-?--+--+-+?--?---	0.0566	36119
rs4898537	12	50243342	c	g	0.3307	-0.0498	0.0082	1.227e-09	----+----------???+-------+-	0.2892	37235
rs1044677	12	50260825	t	c	0.3195	-0.0512	0.0084	1.235e-09	---------------???+-----+-+-	0.3926	37235
rs7302465	12	50243795	a	g	0.3307	-0.0498	0.0082	1.255e-09	----+----------???+-------+-	0.2808	37235
rs4898539	12	50251910	t	g	0.6691	0.0498	0.0082	1.257e-09	++++-++++++++++???-+++++++-+	0.2277	37235
rs7603153	2	25116966	t	c	0.6488	-0.048	0.0079	1.26e-09	----+---+---+----+-+----+---	0.2103	39618
rs6545808	2	25124388	a	c	0.3514	0.048	0.0079	1.274e-09	++++-+++-+++-++++-+-++++-+++	0.1701	39618
rs9773606	8	28068058	t	c	0.431	-0.0467	0.0077	1.274e-09	---++----+-------+-+-+------	0.7999	39618
rs11030088	11	27646247	a	g	0.2329	0.055	0.0091	1.275e-09	+-+-++-++++++++?+?++++++++++	0.7038	38693
rs34633411	18	57854694	t	c	0.2261	0.0549	0.009	1.282e-09	++++-++-++-+--+-++-+-+++++++	0.1029	39618
rs10175064	2	25117537	t	c	0.6489	-0.048	0.0079	1.3e-09	----+---+---+----+-+----+---	0.2104	39618
rs7608185	2	25115432	c	g	0.3451	0.0484	0.008	1.304e-09	++++-+++++++-++++-+-++++-+++	0.1981	39618
rs1965873	12	50257095	t	c	0.3406	-0.0493	0.0081	1.307e-09	----+-----------?-+-------+-	0.2857	38160
rs10179794	2	25113989	t	c	0.6493	-0.048	0.0079	1.324e-09	----+---+---+----+-+----+---	0.1995	39618
rs6545807	2	25124358	t	c	0.3514	0.048	0.0079	1.327e-09	++++-+++-+++-++++-+-++++-+++	0.1686	39618
rs6545795	2	25116783	t	c	0.351	0.048	0.0079	1.344e-09	++++-+++-+++-++++-+-++++-+++	0.2141	39618
rs148069489	16	19975782	t	c	0.1362	-0.0672	0.0111	1.374e-09	---+---+----+-----------+---	0.9496	39618
rs4077679	2	25122852	t	c	0.6486	-0.0479	0.0079	1.388e-09	----+---+---+----+-+----+---	0.1725	39618
rs17175518	18	57850583	a	c	0.2256	0.0548	0.009	1.389e-09	++++-++-++-+--+-++-+-+++++++	0.1103	39618
rs7590512	2	25406403	t	c	0.196	-0.0593	0.0098	1.504e-09	----+----+--+---?-----------	0.9357	38160
rs4665769	2	25403310	t	c	0.2005	-0.0587	0.0097	1.52e-09	----+----+--+-+-?-----------	0.8893	38160
rs73146396	2	558080	t	g	0.0649	-0.0978	0.0162	1.54e-09	----------+-------+--?--?-+-	0.2676	38668.1
rs55880046	16	19941557	t	g	0.867	0.0668	0.0111	1.56e-09	+++-+++-++++-+++++++++++-+++	0.9414	39618
rs4898517	12	49709427	a	g	0.736	-0.0532	0.0088	1.598e-09	------++--+----+-++-+---+---	0.5681	39617.9
rs72771041	16	19927707	t	g	0.8679	0.067	0.0111	1.62e-09	+++-+++-++++-++++-++++++-+++	0.91	39618
rs58109580	16	19977473	t	g	0.8636	0.0675	0.0112	1.626e-09	+++-+++-++++-++?+?++++++-+++	0.9596	38693
rs2278483	2	25040082	t	c	0.235	-0.0538	0.0089	1.629e-09	-------+--+---++?-+---------	0.8945	38266
rs56791931	16	19977420	t	g	0.1363	-0.0675	0.0112	1.642e-09	---+---+----+--?-?------+---	0.9598	38693
rs12713419	2	25121853	a	g	0.3423	0.0479	0.008	1.679e-09	++++-+++++++-++++-+-++++-+++	0.1867	39618
rs58653754	16	19977601	a	c	0.1363	-0.0674	0.0112	1.733e-09	---+---+----+--?-?------+---	0.9602	38693.1
rs59323025	16	19977617	a	c	0.1363	-0.0674	0.0112	1.742e-09	---+---+----+--?-?------+---	0.9602	38693
rs7945	2	25042622	a	g	0.7686	0.0546	0.0091	1.764e-09	+++++++--+-+++--?+-+++++++++	0.8595	38160
rs72807674	2	25333105	a	c	0.7253	-0.0529	0.0088	1.826e-09	----------+-+--+-------+----	0.778	39618
rs12444979	16	19933600	t	c	0.1339	-0.069	0.0115	1.831e-09	-?-??--+--?-?-----------+---	0.9316	36963
rs13014100	2	25123040	t	c	0.3304	0.0511	0.0085	1.839e-09	++++-+++++++-+++?-+-+?++?+++	0.1175	37210
rs12446554	16	19935073	t	g	0.1329	-0.0665	0.0111	1.885e-09	---+---+----+-----------+---	0.9288	39618
rs1573990	2	555344	a	c	0.9204	0.086	0.0143	1.912e-09	++++++++++-+++++++++++++++++	0.5255	39618
rs12233132	2	25328703	t	c	0.3141	-0.0513	0.0086	1.924e-09	-?-??-----?-?-------+---+---	0.8444	37069
rs6484320	11	27703188	a	t	0.7907	0.0555	0.0093	1.966e-09	+++++++--+-+--+-+-++-+++-+++	0.4843	39618
rs4665287	2	25413309	t	c	0.2035	-0.0565	0.0094	2.049e-09	----+----+--+-0-?-----------	0.8295	38265
rs34926599	6	50880479	t	c	0.2958	0.0497	0.0083	2.071e-09	++++++-++-++++++++--++++++++	0.4368	39618.1
rs12963533	18	57740710	a	g	0.2415	0.0533	0.0089	2.074e-09	+++++++-++-+--+-++++-++++++-	0.04945	39617.9
rs9631062	2	25110084	t	c	0.3245	0.0489	0.0082	2.098e-09	++++-+++++++-+-++-+++?++?+++	0.1855	38668
rs4898511	12	50246482	a	c	0.663	0.0487	0.0081	2.139e-09	++-+-+++++++++++?+-+++++++-+	0.2461	38160
rs11030107	11	27694835	a	g	0.7565	-0.0528	0.0088	2.141e-09	-+-+--+--------?-?----------	0.5798	38693
rs7307673	12	50238204	a	g	0.347	-0.0485	0.0081	2.143e-09	-+--------------?-+-------+-	0.5658	38160
rs8092668	18	57783111	a	g	0.7628	-0.0533	0.0089	2.144e-09	-------+--+-+--+----+------+	0.07203	39618
rs12446632	16	19935389	a	g	0.1328	-0.0655	0.0109	2.159e-09	---+---+----+-----------+---	0.9227	39721
rs11030102	11	27681596	c	g	0.7566	-0.0528	0.0088	2.16e-09	-+-+--+--------?-?----------	0.6025	38693.1
rs6923215	6	50889848	a	g	0.2958	0.0497	0.0083	2.16e-09	++++++-++-++++++++--++++++++	0.428	39618.1
rs10164842	2	25113803	t	c	0.3339	0.0484	0.0081	2.167e-09	++++-+++++++-+-++-+++?++?+++	0.219	38668
rs72771049	16	19933511	t	g	0.1328	-0.0662	0.0111	2.17e-09	---+---+----+-----------+---	0.9264	39618
rs11152213	18	57852948	a	c	0.7727	-0.054	0.009	2.176e-09	----+--+--+-++-+--+-+-------	0.1054	39618.1
rs17799110	2	24996715	a	t	0.2329	-0.0545	0.0091	2.185e-09	----+--+--+---++?-+---------	0.6834	38160
rs72771045	16	19931114	t	c	0.1313	-0.0672	0.0112	2.208e-09	---+---+----+-----------+---	0.8826	39617.9
rs72771047	16	19931360	a	g	0.1302	-0.0673	0.0113	2.212e-09	---+---+----+-----------+---	0.9312	39618
rs7565468	2	25130092	t	c	0.3266	0.0481	0.008	2.225e-09	++++-+++++++-+-++-+++?++?+++	0.2246	38774
rs2384078	2	25294418	c	g	0.1989	0.0603	0.0101	2.296e-09	++++++++++-+-+++?++++?+-?+++	0.9397	37210.1
rs151209987	16	19929619	a	c	0.8709	0.0677	0.0113	2.323e-09	+++-+++-++++-+++++++++++-+++	0.9393	39618
rs62140587	2	25035379	c	g	0.7652	0.0541	0.0091	2.34e-09	+++++++-++-+++--?+-+++++++++	0.8945	38160
rs1344840	2	25070645	a	g	0.2635	-0.0509	0.0085	2.345e-09	-------++-+----+--+--?--?---	0.676	38775
rs2947410	2	614375	a	c	0.6349	0.0489	0.0082	2.353e-09	+-++++++++++-++?+?++-??+?+-+	0.8473	36110.1
rs575908	1	177900098	t	c	0.7036	-0.0485	0.0081	2.359e-09	---+---+--+-+----+----+---+-	0.06396	39718
rs7103411	11	27700125	t	c	0.7908	0.0553	0.0093	2.385e-09	+++++++--+-+--+-+-++-+++-+++	0.5143	39618
rs4923464	11	27683618	t	c	0.2049	-0.0555	0.0093	2.452e-09	-------++++-++-+----+-------	0.3343	39618
rs538656	18	57850422	t	g	0.2274	0.0539	0.009	2.463e-09	++++-++-++-+--+-++-+-+++++++	0.1316	39618
rs6922746	6	50889828	a	t	0.7026	-0.0495	0.0083	2.51e-09	------+--+--------++--------	0.4292	39618
rs36190479	18	57740906	a	c	0.2407	0.0529	0.0089	2.563e-09	+++++++-++-+--+-++++-++++++-	0.04202	39618
rs11169186	12	50251984	a	g	0.4085	-0.05	0.0084	2.654e-09	----------------?-+-------+-	0.4949	38160
rs8092496	18	57747974	a	g	0.2425	0.0528	0.0089	2.671e-09	+++++++-++-+--+-++++-++++++-	0.04184	39618
rs10835211	11	27701365	a	g	0.2399	0.052	0.0087	2.683e-09	+-+-++-++++++++?+?++++++++++	0.5639	38800
rs7198972	16	19942331	a	g	0.8668	0.0664	0.0112	2.694e-09	+++-+++-++++-++?+?++++++-+++	0.9503	38692.9
rs11662368	18	57757978	a	g	0.7657	-0.054	0.0091	2.706e-09	-------+--+-++-+----+------+	0.04907	39618
rs55645784	18	57745302	t	c	0.2403	0.0528	0.0089	2.71e-09	+++++++-++-+--+-++++-++++++-	0.04082	39618
rs150742980	2	25027311	t	c	0.2317	-0.0541	0.0091	2.716e-09	-------++-+---++?-+---------	0.9026	38160
rs12617514	2	25419691	t	c	0.2065	-0.0559	0.0094	2.722e-09	----+----+--+-+-?-----------	0.8222	38265
rs72982930	18	57742493	a	g	0.7596	-0.0528	0.0089	2.728e-09	-------+--+-++-+----+------+	0.04068	39617.9
rs71357686	18	57741114	t	g	0.7596	-0.0528	0.0089	2.731e-09	-------+--+-++-+----+------+	0.04045	39618
rs11152210	18	57740612	a	g	0.24	0.0528	0.0089	2.738e-09	+++++++-++-+--+-++++-++++++-	0.03946	39618.1
rs7190603	16	19928662	t	c	0.8677	0.0666	0.0112	2.761e-09	+++-+++-++++-++?+?++++++-+++	0.9261	38693
rs10875986	12	50251571	t	g	0.6499	0.049	0.0082	2.804e-09	++++-+++++++++++?+-+++++++-+	0.2209	38160
rs72807675	2	25334282	a	c	0.2673	0.0523	0.0088	2.863e-09	++++++++++-+-++-+++++++-++++	0.8543	39618
rs72982934	18	57747215	t	g	0.2402	0.0528	0.0089	2.866e-09	+++++++-++-+--+-++++-++++++-	0.03809	39617.9
rs11892043	2	24990082	a	g	0.717	0.0507	0.0085	2.906e-09	++++-++-++-+++-+?-++++++-+++	0.6133	38160
rs12986610	2	25106265	t	c	0.3274	0.0477	0.008	2.92e-09	++++-+++++++-+-++-+++-++-+++	0.1502	39618
rs11693308	2	24946188	t	c	0.2303	-0.0541	0.0091	2.927e-09	----+--+--+---++?-+---------	0.5631	38160
rs2384091	2	25406118	a	t	0.7956	0.0568	0.0096	2.97e-09	++++-++++-++-+++?+++++++++++	0.857	38160
rs13035239	2	25134000	a	t	0.3251	0.0483	0.0081	2.982e-09	++++-+++++++-+-++-+++?++?+++	0.2063	38668
rs522367	1	177901713	t	c	0.5645	-0.0452	0.0076	2.988e-09	---------------+-----+----++	0.6359	39618
rs8055543	16	19926191	t	c	0.868	0.0665	0.0112	2.993e-09	+++-+++-++++-++?+?++++++-+++	0.924	38693
rs10205326	2	25111734	t	c	0.3203	0.0483	0.0081	3.004e-09	++++-+++++++-+0++-+++-++-+++	0.1489	39618
rs10164466	2	25114069	t	c	0.6754	-0.0482	0.0081	3.046e-09	----+-------+-+--+---?--?---	0.1991	38668
rs67083646	2	614081	t	g	0.3589	-0.0487	0.0082	3.076e-09	-+----------+--?-?--+??-?-+-	0.7915	36110
rs8030	1	177897975	t	c	0.2952	0.0488	0.0082	3.1e-09	+++-+++-++++-++++-++++-+++-+	0.05297	39618
rs10204896	2	25427035	a	t	0.8016	0.058	0.0098	3.112e-09	+++++++++-++-+++?+++++++++++	0.878	38160
rs11074418	16	19940498	t	c	0.1333	-0.0662	0.0112	3.141e-09	---+---+----+--?-?------+---	0.95	38693
rs11640504	16	19932045	a	g	0.1324	-0.0663	0.0112	3.181e-09	---+---+----+--?-?------+---	0.9247	38693
rs11030034	11	27516785	c	g	0.3114	0.0541	0.0091	3.212e-09	+-++++-++++--+++?+-+-+++++++	0.058	38160
rs56200610	2	24966573	t	c	0.2838	-0.0505	0.0085	3.28e-09	----+--+--+---+-?+------+---	0.6226	38159.9
rs11683429	2	25120733	a	t	0.3173	0.0485	0.0082	3.282e-09	++++-+++++++-++++-+++-++-+++	0.1781	39617.9
rs11895026	2	25036858	a	c	0.2325	-0.0536	0.0091	3.342e-09	-------+--+---++?-+---------	0.8949	38160
rs953567	1	74977425	a	g	0.5846	-0.0479	0.0081	3.38e-09	------++-++----???---?--?-+-	0.8596	36285.1
rs4665775	2	25407121	a	g	0.7952	0.0565	0.0096	3.433e-09	++++-++++-++-+++?+++++++++++	0.8496	38160
rs10203898	2	556738	a	g	0.9254	0.087	0.0147	3.497e-09	++++++++++-++++?+?++++++++++	0.5208	38693
rs17744531	2	25302846	a	g	0.2676	0.0521	0.0088	3.521e-09	++++++++++-+-++-+++++++-++++	0.8913	39618
rs10742179	11	27650524	a	g	0.2676	-0.0513	0.0087	3.522e-09	-+------+++----?-?-+-?--?---	0.09805	37743
rs10195271	2	25108650	a	c	0.3241	0.0476	0.0081	3.529e-09	++++-+++++++-+-++-+++-++-+++	0.1862	39618
rs11639988	16	19944363	a	g	0.8639	0.0643	0.0109	3.531e-09	+++-+++-++++-+++++++++++-+++	0.9283	39724
rs11030084	11	27643725	t	c	0.1856	-0.057	0.0097	3.536e-09	---------++-++--------------	0.4958	39618
rs17817288	16	53807764	a	g	0.5113	-0.0459	0.0078	3.547e-09	----++++----+-+???----------	0.09243	37235
rs7541513	1	75014195	a	g	0.4284	0.0456	0.0077	3.559e-09	++++++--+--++++?+?++++++++-+	0.5967	38794
rs1031477	12	50218644	t	c	0.5326	0.0469	0.0079	3.579e-09	+-+??+++++?+?+-???++++++++-+	0.8057	35225
rs11030104	11	27684517	a	g	0.796	0.0549	0.0093	3.622e-09	+++++++----+--+?+?++-+++++++	0.2565	38798
rs73146366	2	552586	t	c	0.9254	0.0868	0.0147	3.698e-09	++++++++++-++++?+?++++++++++	0.5401	38693.1
rs73146364	2	552493	t	c	0.9254	0.0868	0.0147	3.75e-09	++++++++++-++++?+?++++++++++	0.5398	38693
rs56186499	2	24964459	a	g	0.7159	0.0502	0.0085	3.881e-09	++++-++-++-+++-+?-++++++-+++	0.6243	38160
rs12612542	2	25403678	t	c	0.2052	-0.057	0.0097	3.916e-09	----+----+--+-+-?----?--?---	0.8184	37210
rs8047395	16	53798523	a	g	0.5065	0.046	0.0078	3.938e-09	++++-+---+++-+-???-++++-++++	0.03835	37235.1
rs2168711	18	57848531	t	c	0.7744	-0.0539	0.0092	3.953e-09	----+--+--+-++-?-?+-+-------	0.09546	38693.1
rs663129	18	57838401	a	g	0.2271	0.0536	0.0091	4.088e-09	++++-++-++-+--+?+?-+-+++++++	0.1528	38693
rs11640942	16	19919946	t	c	0.1326	-0.0655	0.0111	4.134e-09	---+---+----+----+------+---	0.9301	39618
rs9463653	6	50835180	a	g	0.7055	-0.0489	0.0083	4.153e-09	------+--+--------++--------	0.5463	39618.1
rs7240682	18	57824038	c	g	0.7799	-0.054	0.0092	4.172e-09	---++--+--+-++-+--+-+-------	0.08755	39617.9
rs12185580	2	25405435	a	t	0.2051	-0.0562	0.0096	4.279e-09	----+----+--+---?-----------	0.8728	38160
rs55677077	12	50219508	t	c	0.505	-0.0458	0.0078	4.288e-09	------------+-+???--------+-	0.475	37235
rs9473924	6	50834157	t	g	0.2945	0.0494	0.0084	4.321e-09	++++++-++-+++++?+?--++++++++	0.4262	38693
rs5016125	2	619056	a	g	0.6438	0.0481	0.0082	4.342e-09	+-++++++++++-++?+?++-??+?+-+	0.8212	36110
rs11675013	2	25107208	a	g	0.3246	0.0473	0.0081	4.343e-09	++++-+++++++-+-++-+++-++-+++	0.1837	39618
rs111675422	2	25408582	t	c	0.2029	-0.0563	0.0096	4.367e-09	----+----+--+---?-----------	0.8411	38160.1
rs10875987	12	50254064	a	g	0.6239	0.0477	0.0081	4.434e-09	++++++++++++++++?+-+++++++-+	0.3695	38160
rs13030692	2	25105877	a	c	0.325	0.0473	0.0081	4.456e-09	++++-+++++++-+-++-+++-++-+++	0.1731	39618
rs4665776	2	25408034	a	g	0.7957	0.0562	0.0096	4.497e-09	++++-++++-++-+++?+++++++++++	0.8532	38160
rs6761875	2	24972217	t	c	0.7152	0.0505	0.0086	4.507e-09	++++-++-++-+++-+?-+++?++?+++	0.6162	37210
rs1865688	2	25108245	c	g	0.6754	-0.0473	0.0081	4.57e-09	----+-------+-+--+---+--+---	0.1849	39618
rs476828	18	57852587	t	c	0.7695	-0.0521	0.0089	4.614e-09	----+--+--+-+--+--+-+-------	0.1222	39725
rs66922415	18	57848651	a	g	0.7737	-0.0535	0.0091	4.652e-09	----+--+--+-++-?-?+-+-------	0.1546	38693
rs9473932	6	50857995	a	g	0.2956	0.0485	0.0083	4.669e-09	++++++-++-+++++?+?--++++++++	0.3713	38799
rs13404163	2	25126616	a	g	0.6725	-0.0477	0.0081	4.709e-09	----+-------+-+--+---?--?---	0.243	38668
rs7593130	2	25138987	t	c	0.756	-0.0522	0.0089	4.729e-09	-++-+---+---+---?+----------	0.4747	38259
rs4665774	2	25404982	t	g	0.7948	0.056	0.0096	4.759e-09	++++-++++-++-+++?+++++++++++	0.8791	38160.1
rs4665771	2	25404327	t	c	0.7947	0.056	0.0096	4.775e-09	++++-++++-++-+0+?+++++++++++	0.8715	38160
rs4923460	11	27656789	t	g	0.2042	-0.0551	0.0094	4.828e-09	--------+++-++-?-?------+---	0.2688	38693
rs7571168	2	616010	t	c	0.3579	-0.0479	0.0082	4.873e-09	-+----------+--?-?--+??-?-+-	0.8112	36110
rs13387053	2	25103025	a	g	0.3248	0.0471	0.0081	4.889e-09	++++-+++++++-+-++-+++-++-+++	0.1936	39618
rs17046917	2	25412032	t	g	0.7964	0.056	0.0096	4.897e-09	++++-++++-++-+0+?+++++++++++	0.8288	38160
rs13412941	2	25102709	t	c	0.3249	0.0471	0.0081	4.908e-09	++++-+++++++-+-++-+++-++-+++	0.1957	39618
rs4665777	2	25410896	t	c	0.2035	-0.056	0.0096	4.917e-09	----+----+--+---?-----------	0.8284	38160.1
rs13428789	2	25087643	t	c	0.335	0.0474	0.0081	4.93e-09	++++-+++++++-+-++-+++?++?+++	0.2349	38668
rs28482811	16	19925612	t	c	0.8327	0.0611	0.0104	4.976e-09	+++-+++-++++-+++?-++++++-+++	0.881	38160
rs17801121	2	25304287	t	c	0.2666	0.0515	0.0088	5.016e-09	++++++++++-+-++-+++++++-++++	0.8825	39618
rs7228430	18	57733925	a	g	0.2551	0.0509	0.0087	5.022e-09	+++++++--+-++-+-++++-+++++++	0.1267	39618
rs9463656	6	50859655	a	g	0.7056	-0.0491	0.0084	5.036e-09	------+--+-----?-?++--------	0.3727	38693.1
rs13412228	2	25411645	t	c	0.7963	0.056	0.0096	5.042e-09	++++-++++-++-+-+?+++++++++++	0.8278	38160
rs491147	2	25313001	c	g	0.2667	0.0515	0.0088	5.088e-09	++++++++++-+-++-+++++++-++++	0.8602	39618.1
rs4665778	2	25410970	a	t	0.7963	0.056	0.0096	5.093e-09	++++-++++-++-+0+?+++++++++++	0.8307	38160
rs7556831	2	612453	t	g	0.3563	-0.0479	0.0082	5.134e-09	-+----------+--?-?--+??-?-+-	0.8319	36110
rs12619264	2	25421803	t	c	0.2038	-0.0559	0.0096	5.135e-09	----+----+--+-0-?-----------	0.7739	38160.1
rs2966399	2	614578	a	g	0.3576	-0.0479	0.0082	5.162e-09	-+----------+--?-?--+??-?-+-	0.8221	36110
rs7204864	16	19942927	t	c	0.136	-0.065	0.0111	5.175e-09	---+---+----+--?-?------+---	0.9568	38693
rs72810017	2	25410997	c	g	0.2037	-0.0559	0.0096	5.179e-09	----+----+--+-0-?-----------	0.8308	38160
rs925947	11	27667367	t	g	0.2037	-0.055	0.0094	5.206e-09	--------+++-++-?-?-+--------	0.2851	38693
rs13335015	16	19905164	t	g	0.1836	-0.0588	0.0101	5.211e-09	---+---+-+--+---?----+--+---	0.7799	38160
rs2384090	2	25406190	t	c	0.7935	0.0565	0.0097	5.237e-09	++++-++++-++-+++?++++?++?+++	0.814	37210
rs6416056	11	27646745	a	g	0.7272	0.0493	0.0084	5.253e-09	+-++++++---++++-++++++++-+++	0.2837	39618
rs4923463	11	27672500	a	g	0.7962	0.055	0.0094	5.28e-09	++++++++---+--+?+?+-++++++++	0.2928	38693
rs34379767	11	27704209	a	g	0.2097	-0.0542	0.0093	5.365e-09	-------++-+-++-+-+--+---+---	0.4383	39618
rs9631061	2	25109804	t	c	0.3259	0.0472	0.0081	5.366e-09	++++-+++++++-+-++-+++-++-+++	0.1947	39618
rs60886478	2	555978	t	c	0.0765	-0.0857	0.0147	5.4e-09	----------+----?-?----------	0.5884	38693
rs1992153	2	25338053	a	g	0.2899	-0.0501	0.0086	5.407e-09	------------+-------+-------	0.7815	39617.9
rs11030087	11	27646246	t	c	0.2721	-0.05	0.0086	5.44e-09	-+------+++----?-?------+---	0.2535	38693
rs11030099	11	27677583	a	c	0.2033	-0.0551	0.0095	5.461e-09	--------+++-++-?-?-+----+---	0.2897	38693
rs11030100	11	27677586	t	g	0.2033	-0.0551	0.0095	5.474e-09	--------+++-++-?-?-+----+---	0.2896	38693
rs4665773	2	25404975	a	c	0.2055	-0.0564	0.0097	5.477e-09	----+----+--+---?----?--?---	0.8271	37209.9
rs4665772	2	25404425	t	c	0.2057	-0.0564	0.0097	5.495e-09	----+----+--+-0-?----?--?---	0.8169	37210
rs6709992	2	614998	a	g	0.3562	-0.0477	0.0082	5.551e-09	-+----------+--?-?--+??-?-+-	0.8089	36110
rs4665284	2	25339658	a	g	0.2814	-0.0495	0.0085	5.618e-09	------------+-------+-------	0.8624	39723
rs7601009	2	612364	t	c	0.6459	0.0479	0.0082	5.626e-09	+-++++++++++-++?+?++-??+?+-+	0.7309	36110
rs6713093	2	25431508	a	g	0.208	-0.0559	0.0096	5.656e-09	----+----+--+-+-?-----------	0.74	38159.9
rs140138951	11	27653995	t	c	0.2056	-0.0544	0.0093	5.665e-09	--------+++-++-+---+----+---	0.2641	39618
rs68191244	18	57733386	t	c	0.745	-0.0507	0.0087	5.675e-09	-------++-+--+-+----+-------	0.1227	39618
rs3769669	2	24949056	a	g	0.2317	-0.053	0.0091	5.678e-09	----+--+--+---++?-+---------	0.6149	38160
rs7575363	2	25342914	a	g	0.7223	-0.049	0.0084	5.68e-09	----------+----+-+-----+----	0.837	39724
rs4923461	11	27656910	a	g	0.7967	0.0543	0.0093	5.696e-09	++++++++---+--+?+?++++++-+++	0.2466	38794
rs146657299	12	50272596	a	t	0.8118	-0.0801	0.0137	5.709e-09	---++--+-?+-?-?-?-------+-+-	0.4777	35018
rs4923457	11	27648580	a	t	0.796	0.0549	0.0094	5.712e-09	++++++++---+--+?+?++++++-+++	0.2486	38692.9
rs36029218	11	27648371	a	t	0.796	0.0549	0.0094	5.719e-09	++++++++---+--+?+?++++++-+++	0.2485	38692.9
rs10187348	2	25078415	c	g	0.3227	0.0475	0.0082	5.743e-09	++++-+++++++-+-++-+++?++?+++	0.3094	38668
rs4854329	2	617176	c	g	0.3817	-0.0471	0.0081	5.783e-09	-+----------+---?---+-----+-	0.5684	38160
rs11689042	2	25057054	c	g	0.261	-0.0505	0.0087	5.954e-09	-------++-+---++--+---------	0.874	39618
rs7972100	12	50228790	t	c	0.3696	-0.0471	0.0081	6.002e-09	----------------?-+-------+-	0.7385	38160
rs4301747	11	27652717	a	g	0.203	-0.0552	0.0095	6.005e-09	--------+++-?+-+--------+---	0.3251	38562.1
rs874401	2	25402280	a	g	0.207	-0.0556	0.0096	6.012e-09	----+----+--+-+-?-----------	0.8868	38160.1
rs67654037	2	614054	a	g	0.3562	-0.0476	0.0082	6.027e-09	-+----------+--?-?--+??-?-+-	0.8098	36110
rs17042105	2	614111	a	g	0.6438	0.0476	0.0082	6.029e-09	+-++++++++++-++?+?++-??+?+-+	0.8098	36110
rs2947413	2	613516	a	g	0.6438	0.0476	0.0082	6.084e-09	+-++++++++++-++?+?++-??+?+-+	0.8107	36110
rs2947412	2	613838	a	g	0.3562	-0.0476	0.0082	6.092e-09	-+----------+--?-?--+??-?-+-	0.8106	36110
rs2966400	2	613883	a	g	0.6438	0.0476	0.0082	6.101e-09	+-++++++++++-++?+?++-??+?+-+	0.8103	36110
rs34347366	2	614235	t	c	0.6438	0.0476	0.0082	6.111e-09	+-++++++++++-++?+?++-??+?+-+	0.8097	36110
rs10186053	2	25410190	a	g	0.7963	0.0557	0.0096	6.131e-09	++++-++++-++-+0+?+++++++++++	0.838	38160
rs36071142	2	25080570	t	c	0.3228	0.0474	0.0082	6.304e-09	++++-+++++++-+-++-+++?++?+++	0.3094	38668.1
rs7597157	2	25089166	t	c	0.3263	0.0462	0.0079	6.334e-09	++++-+++++++-+-++-+++-++-+++	0.2211	39722
rs10184813	2	25090236	t	c	0.6724	-0.0472	0.0081	6.368e-09	----+-------+-+--+---?--?---	0.2637	38667.9
rs4665770	2	25404307	a	g	0.2061	-0.0562	0.0097	6.396e-09	----+----+--+-0-?----?--?---	0.8124	37209.9
rs6567155	18	57755117	t	c	0.2404	0.0515	0.0089	6.422e-09	+++++++-++-+-++?+?++-++++++-	0.08245	38799
rs1965131	2	25446249	t	c	0.2057	-0.0559	0.0096	6.429e-09	----+----+--+---?-----------	0.8032	38159.9
rs62140561	2	25010418	a	g	0.2235	-0.0549	0.0095	6.435e-09	-------++-+---+-?-+--?--?---	0.7178	37210
rs2683989	2	599547	a	c	0.3631	-0.049	0.0084	6.47e-09	-+----------+--???--+??-?-+-	0.8323	34652
rs28588186	16	19910313	c	g	0.8113	0.0579	0.01	6.48e-09	+++-+++-+-++-+++?++++-++-+++	0.7707	38160.1
rs16969339	16	19914784	a	t	0.1795	-0.0583	0.01	6.514e-09	---+---+-+--+---?----+--+---	0.8125	38160
rs6759177	2	601580	t	c	0.3617	-0.0484	0.0083	6.545e-09	-+----------+--???--+??-?-+-	0.7427	34652
rs4665779	2	25412672	a	g	0.7961	0.0561	0.0097	6.651e-09	++++-++++-++-+0+?++++?++?+++	0.7762	37210
rs12619868	2	25412845	t	c	0.7962	0.0561	0.0097	6.661e-09	++++-++++-++-+0+?++++?++?+++	0.7765	37210
rs7605313	2	616168	t	g	0.6438	0.0474	0.0082	6.679e-09	+-++++++++++-++?+?++-??+?+-+	0.8057	36110
rs72807668	2	25307080	a	t	0.2681	0.0511	0.0088	6.698e-09	++++++++++-+-++-+++++++-++++	0.875	39618
rs1539952	18	57766512	a	g	0.7621	-0.052	0.009	6.719e-09	-------+--+-+--?-?--+------+	0.1025	38693
rs6545698	2	24959261	t	g	0.7146	0.0495	0.0085	6.729e-09	++++-++-++-+++-+?-++++-+-+++	0.6176	38160
rs13418905	2	25341001	a	g	0.2843	-0.0505	0.0087	6.731e-09	------------+-------++------	0.7221	39618
rs11030086	11	27646157	a	t	0.2889	-0.0495	0.0085	6.774e-09	-+------+++--+-?-?-+-?--?---	0.1784	37743
rs12619018	2	25426798	t	c	0.2042	-0.0555	0.0096	6.815e-09	----+----+--+-0-?-----------	0.79	38160
rs11889662	2	24942448	t	c	0.7675	0.0527	0.0091	6.931e-09	++++-++-++-+++--?+-+++++++++	0.5937	38159.9
rs60946859	2	25426592	c	g	0.2041	-0.0555	0.0096	6.943e-09	----+----+--+-+-?-----------	0.7894	38160.1
rs77848049	2	25240067	a	g	0.1954	0.0587	0.0101	6.961e-09	+-++++++++-+-+++?++++?++?+++	0.89	37210.1
rs4898536	12	50240150	t	c	0.6701	0.0474	0.0082	6.988e-09	++++-++++++++++???-++?++?+-+	0.4067	36389
rs1861866	16	53804340	t	c	0.5082	0.045	0.0078	7e-09	++++-+---+++-+-???-++++-++++	0.0289	37235.1
rs2966401	2	613869	a	g	0.6433	0.0474	0.0082	7.016e-09	+-++++++++++-++?+?++-??+?+-+	0.81	36110
rs28432761	16	53823878	t	c	0.4827	-0.0447	0.0077	7.034e-09	-+--+-+++-+-----?++---------	0.1005	38160
rs9921480	16	19919440	c	g	0.8333	0.0605	0.0105	7.054e-09	+++-+++-++++-+++?+++++++-+++	0.9034	38160
rs4074134	11	27647285	t	c	0.2033	-0.054	0.0093	7.135e-09	--------+++-++-?-?------+---	0.2221	38797
rs12966111	18	57735675	c	g	0.7416	-0.0502	0.0087	7.165e-09	-------++-+-+--+----+------+	0.1471	39618
rs962369	11	27734420	t	c	0.7017	-0.0484	0.0084	7.222e-09	------++--------?-----------	0.6507	38160
rs11688754	2	25133885	t	c	0.3247	0.0466	0.0081	7.225e-09	++++-+++++++-+-++-+++-++-+++	0.192	39617.9
rs11125797	2	25037626	t	g	0.2332	-0.053	0.0092	7.274e-09	-------+--+---++?-+--?--?---	0.8572	37210
rs8055197	16	53803156	a	g	0.5082	0.045	0.0078	7.311e-09	++++-+---+++-+-???-++++-++++	0.02913	37235
rs112484812	2	25425899	c	g	0.7957	0.0554	0.0096	7.465e-09	++++-++++-++-+++?+++++++++++	0.8063	38160
rs7483762	11	27653879	a	g	0.2034	-0.0539	0.0093	7.674e-09	--------+++-++-+--------+---	0.3148	39618
rs3885610	16	19923044	t	c	0.8329	0.0604	0.0105	7.69e-09	+++-+++-++++-+++?+++++++-+++	0.9009	38160.1
rs12419948	11	27666984	a	t	0.2031	-0.0539	0.0093	7.724e-09	--------+++-++-+---+--------	0.344	39618
rs112166082	2	25428312	t	c	0.204	-0.0553	0.0096	7.734e-09	----+----+--+-0-?-----------	0.7936	38160
rs7576314	2	25138765	t	c	0.245	0.0521	0.009	7.81e-09	+--+-+++-+++-+++?-++++++++++	0.5004	38160.1
rs66493557	2	25429405	a	g	0.2029	-0.0554	0.0096	7.867e-09	---------+--+---?-----------	0.8149	38160
rs4665288	2	25437054	t	c	0.7966	0.0555	0.0096	7.872e-09	++++-++++-++-+++?+++++++++++	0.7737	38160.1
rs66908137	12	50219489	t	c	0.5134	-0.0451	0.0078	7.873e-09	------+-----+-+???--------+-	0.3406	37235
rs7237076	18	57752803	a	c	0.7581	-0.0517	0.009	7.892e-09	-------+--+-++-?-?--+------+	0.07858	38692.9
rs3751813	16	53818708	t	g	0.5417	0.0458	0.0079	7.894e-09	+-+??+---+-+?+-+?--++++-++-+	0.01708	36206
rs16917204	11	27668355	c	g	0.2031	-0.0538	0.0093	7.929e-09	--------+++-++-+---+--------	0.3469	39618
rs66707897	2	25438335	t	g	0.7966	0.0555	0.0096	7.933e-09	++++-++++-++-+++?+++++++++++	0.774	38160
rs13382979	2	25131736	a	g	0.3256	0.0465	0.0081	7.976e-09	++++-+++++++-+-++-+++-++-+++	0.1828	39617.9
rs9922047	16	53806280	c	g	0.4916	-0.0448	0.0078	7.989e-09	----+-+++---+-+???+----+----	0.02896	37235
rs11169166	12	50215905	t	c	0.5344	0.0446	0.0077	8.001e-09	+-++++++++++-+-+?+++++++++-+	0.5431	38160
rs7976060	12	49707102	a	g	0.2317	0.0537	0.0093	8.003e-09	++++++--++-+-++-+-++++++++++	0.715	39618
rs67221599	2	25131948	t	c	0.6754	-0.0464	0.008	8.106e-09	----+-------+-+--+---+--+---	0.1767	39617.9
rs11836282	12	50177324	a	t	0.7256	-0.0526	0.0091	8.186e-09	------+---+-+--???---++-----	0.02826	37234.9
rs59394232	2	25453213	c	g	0.2032	-0.0561	0.0097	8.195e-09	----+----+--+---?-----------	0.7373	38159.9
rs11168973	12	49710572	c	g	0.7705	-0.053	0.0092	8.282e-09	------++----+--+-+--+-------	0.7444	39618
rs10170104	2	25351693	c	g	0.2614	0.051	0.0089	8.284e-09	+--+++++++-+-++-+-+++++-++++	0.5812	39618
rs112729989	2	25439539	a	g	0.2035	-0.0554	0.0096	8.349e-09	----+----+--+---?-----------	0.7745	38160.1
rs4665783	2	25448050	a	g	0.7961	0.0557	0.0097	8.371e-09	++++-++++-++-+++?+++++++++++	0.75	38160
rs17046737	2	25127835	t	c	0.3273	0.0464	0.0081	8.393e-09	++++-+++++++-+-++-+++-++-+++	0.2137	39618
rs2883659	16	19911174	t	g	0.8163	0.0577	0.01	8.431e-09	+++-+++-+-++-+++?++++-++-+++	0.8098	38159.9
rs4479345	18	57735792	t	c	0.2585	0.0499	0.0087	8.583e-09	+++++++--+-+-++-++++-++++++-	0.1465	39617.9
rs10501087	11	27670108	t	c	0.7969	0.0536	0.0093	8.586e-09	++++++++---+--+?+?+-++++++++	0.2519	38796
rs12471258	2	25432145	a	g	0.2033	-0.0553	0.0096	8.62e-09	---------+--+---?-----------	0.7839	38160
rs28564801	18	57780253	t	c	0.7617	-0.0517	0.009	8.69e-09	-------+--+-+--?-?--+------+	0.1122	38692.9
rs13428763	2	25132855	t	g	0.6753	-0.0463	0.008	8.771e-09	----+-------+-+--+---+--+---	0.1784	39618
rs112557069	2	25425972	t	c	0.7958	0.0557	0.0097	8.991e-09	++++-++++-++-+++?++++?++?+++	0.7326	37210
rs11125923	2	25336277	a	g	0.2782	-0.0496	0.0086	9.047e-09	------------+-------+-------	0.8645	39618
rs62144584	2	25004937	t	c	0.7146	0.0498	0.0087	9.137e-09	++++-++-++-+++-+?-+++?++?+++	0.6129	37210.1
rs12624309	2	25437885	a	c	0.2026	-0.0554	0.0096	9.163e-09	----+----+--+---?-----------	0.775	38160
rs10196998	2	25091786	a	g	0.3237	0.0467	0.0081	9.229e-09	++++-+++++++-+-++-+++-++-+++	0.2671	39617.9
rs1942860	18	57756055	t	c	0.2389	0.052	0.009	9.309e-09	+++++++-++-+--+?+?++-++++++-	0.08484	38693
rs113842013	2	25440403	t	c	0.2068	-0.0552	0.0096	9.503e-09	----+----+--+-+-?-----------	0.7261	38160
rs61765651	1	72754314	t	c	0.1701	-0.0584	0.0102	9.503e-09	----+--+--+----?-?-------+--	0.7101	38693
rs79782580	18	57889651	a	g	0.7528	-0.0513	0.0089	9.692e-09	-------+--+-?+-+--+-+-------	0.3219	38562
rs4077677	2	25122798	c	g	0.3247	0.0462	0.008	9.699e-09	++++-+++++++-+-++-+++-++-+++	0.1776	39618
rs66751349	16	19911869	t	c	0.1836	-0.0574	0.01	9.733e-09	---+---+-+--+---?----+--+---	0.8109	38160.1
rs13420827	2	25453968	c	g	0.7965	0.0559	0.0097	9.787e-09	++++-++++-++-+++?+++++++++++	0.7648	38160
rs11520442	18	57744576	t	c	0.7585	-0.0514	0.009	9.813e-09	-------+--+-++-?-?--+------+	0.08197	38693
rs35578933	18	57749186	t	c	0.7585	-0.0514	0.009	9.842e-09	-------+--+-++-?-?--+------+	0.08157	38693
rs7106058	11	27655318	t	c	0.7111	0.0479	0.0084	1.009e-08	+-++++++---++-+-+++-++++-+++	0.2646	39618.1
rs2082882	2	25445121	t	c	0.797	0.0553	0.0097	1.012e-08	++++-++++-++-+++?+++++++++++	0.7808	38160.1
rs7571872	2	616686	t	c	0.3567	-0.0469	0.0082	1.013e-08	-+----------+--?-?--+??-?-+-	0.7957	36110
rs55758326	12	50217231	t	c	0.5065	0.0447	0.0078	1.033e-08	+-++++++++++-+-???++++++++-+	0.3205	37234.9
rs4665782	2	25433965	a	g	0.2048	-0.0549	0.0096	1.039e-08	----+----+--+-+-?-----------	0.7995	38160
rs2164411	2	25452906	a	g	0.2022	-0.0557	0.0097	1.04e-08	----+----+--+-0-?-----------	0.7646	38160
rs66589178	2	25425616	c	g	0.2044	-0.0553	0.0097	1.072e-08	----+----+--+-0-?----?--?---	0.7517	37210
rs61765650	1	72753112	a	g	0.8313	0.0585	0.0102	1.075e-08	++++-++-++-++++?+?+++++++-++	0.7498	38693.1
rs10176698	2	25416590	t	c	0.2024	-0.0555	0.0097	1.098e-08	----+----+--+-+-?----?--?---	0.7487	37209.9
rs3731631	2	25359422	a	g	0.2774	0.0502	0.0088	1.099e-08	+?+??+++++?+?++-+-+++++-++++	0.6786	37067
rs66674044	16	19904344	a	t	0.8673	0.0648	0.0114	1.11e-08	+++-+++-++++-++?+?++++++-+++	0.884	38693
rs10202360	2	25420865	a	c	0.7949	0.0546	0.0096	1.111e-08	++++-++++-++-+-+?+++++++++++	0.8224	38159.9
rs13012304	2	25122246	t	c	0.3246	0.046	0.008	1.111e-08	++++-+++++++-+-++-+++-++-+++	0.1805	39618
rs36029941	2	25127801	t	c	0.327	0.046	0.0081	1.127e-08	++++-+++++++-+-++-+++-++-+++	0.2122	39618
rs76645364	2	25393388	a	g	0.7873	0.0547	0.0096	1.129e-08	+++++++++-++++++?+++++++++++	0.8696	38160
rs13398155	2	25128550	t	c	0.3269	0.046	0.0081	1.132e-08	++++-+++++++-+-++-+++-++-+++	0.2085	39617.9
rs57835771	2	25444438	c	g	0.2039	-0.0551	0.0096	1.144e-08	----+----+--+---?-----------	0.8011	38160.1
rs3731629	2	24955160	a	g	0.7129	0.0486	0.0085	1.152e-08	++++-+--++-+++-+?-++++++-+++	0.7082	38160.1
rs11030067	11	27620932	t	c	0.2228	0.0522	0.0091	1.159e-08	+-++++-+++++-+-+++-+-+++++++	0.08554	39618.1
rs958717	2	25325444	t	c	0.2783	-0.0493	0.0086	1.169e-08	------------+-------+-------	0.8622	39617.9
rs35072958	2	25125824	t	c	0.327	0.0459	0.0081	1.176e-08	++++-+++++++-+-++-+++-++-+++	0.2178	39618.1
rs10167020	2	25429424	a	g	0.7956	0.0547	0.0096	1.177e-08	+++++++++-++-+0+?+++++++++++	0.8422	38160.1
rs12102869	16	19918987	t	c	0.8322	0.0602	0.0106	1.183e-08	+++-+++-++++-++???++++++-+++	0.9325	37235
rs6719064	2	25125003	a	g	0.327	0.0459	0.0081	1.183e-08	++++-+++++++-+-++-+++-++-+++	0.2184	39618
rs7560156	2	25124794	t	c	0.673	-0.0459	0.0081	1.184e-08	----+-------+-+--+---+--+---	0.2186	39618
rs4244531	11	27657250	a	g	0.7914	0.053	0.0093	1.197e-08	+++++++----+--+-++++++++++++	0.2506	39618
rs2613496	1	72754788	t	c	0.1735	-0.0578	0.0101	1.207e-08	----+--+--+----?-?-------+--	0.7357	38693
rs12468449	2	25432277	t	c	0.7948	0.0546	0.0096	1.214e-08	++++-++++-++-+-+?+++++++++++	0.8051	38160
rs10171663	2	25086431	t	c	0.6656	-0.0457	0.008	1.232e-08	----+-------+-+--+---+--+---	0.2267	39618
rs57534183	2	25444484	c	g	0.2037	-0.055	0.0097	1.236e-08	----+----+--+---?-----------	0.8024	38160
rs11645492	16	19914412	t	g	0.8193	0.0572	0.01	1.246e-08	+++-+++-+-++-+++?++++-++-+++	0.7599	38160
rs12233134	2	25329016	t	c	0.2783	-0.0492	0.0086	1.261e-08	------------+-------+-------	0.86	39618
rs12740789	1	72752073	a	g	0.1708	-0.0573	0.0101	1.264e-08	----+--+--+------+-------+--	0.7906	39618
rs897057	12	50266279	t	c	0.3126	-0.0464	0.0082	1.282e-08	--+-------------?-+-------+-	0.2866	38265
rs41279738	1	110082551	t	g	0.9623	-0.1199	0.0211	1.296e-08	----+----+----+---+---+-----	0.6166	39618
rs4922793	11	27729505	a	g	0.7903	0.0541	0.0095	1.297e-08	+++++++--+-+--+???++-+++-+++	0.3947	37235
rs117432699	12	49711553	t	c	0.2233	0.0534	0.0094	1.297e-08	++++++--++-+-++-+--+-+++++++	0.6708	39618
rs34361149	1	72750470	a	g	0.1717	-0.0577	0.0102	1.308e-08	----+--+--+----?-?-------+--	0.7208	38693
rs11683748	2	25130434	t	c	0.3266	0.0458	0.0081	1.327e-08	++++-+++++++-+-++-+++-++-+++	0.2128	39618
rs35693910	18	57913965	a	g	0.2541	0.0526	0.0093	1.328e-08	+++++++-++-+?-+-?+-+-+++++++	0.4874	37104
rs2891458	2	25445094	a	c	0.2037	-0.0548	0.0097	1.333e-08	----+----+--+---?-----------	0.802	38160.1
rs2384092	2	25402891	t	c	0.7913	0.0542	0.0095	1.337e-08	++++-++++-++-+++?+++++++++++	0.9309	38160.1
rs114929124	1	110088657	a	g	0.0374	0.12	0.0211	1.344e-08	++++-++++-++++-+++-+++-+++++	0.5707	39618
rs144376234	1	110114504	t	c	0.0374	0.1195	0.021	1.348e-08	++++-++++-++++-+++-+++-+++++	0.5229	39618
rs68039326	2	25440478	a	g	0.796	0.0552	0.0097	1.354e-08	++++-++++-++-+++?++++?++?+++	0.7459	37210
rs2384056	2	25092649	a	g	0.3271	0.0457	0.0081	1.355e-08	++++-+++++++-+-++-+++-++-+++	0.2441	39618
rs12233169	2	25329272	t	c	0.2783	-0.049	0.0086	1.367e-08	------------+-------+-------	0.853	39618
rs12612413	2	25426846	t	g	0.2053	-0.0549	0.0097	1.37e-08	----+----+--+-+-?----?--?---	0.7717	37209.9
rs7116850	11	27645530	a	g	0.7274	0.0473	0.0083	1.374e-08	+-++++++---++-+-++++++++-+++	0.23	39723
rs11685125	2	25092104	a	g	0.6728	-0.0457	0.0081	1.376e-08	----+-------+-+--+---+--+---	0.2466	39618.1
rs4923458	11	27656113	t	c	0.806	0.0552	0.0097	1.377e-08	++++++++-+-+-+++++++++++-+++	0.2332	39618
rs34579341	1	72745962	a	g	0.8218	0.0568	0.01	1.393e-08	++++-++-++-++++?+?+++++++-++	0.6948	38693
rs9921401	16	19919338	c	g	0.833	0.0599	0.0106	1.402e-08	+++-+++-++++-++???++++++-+++	0.9229	37234.9
rs706797	12	50266858	c	g	0.3124	-0.047	0.0083	1.471e-08	--+-------------?-+-------+-	0.2845	38160
rs836967	12	50267613	c	g	0.6862	0.047	0.0083	1.473e-08	++-+++++++++++++?+-+++++++-+	0.2451	38160
rs28493849	12	49694626	t	c	0.2153	0.0527	0.0093	1.485e-08	++++++--++-++++++-++-+++++++	0.6945	39618
rs2613499	1	72751552	a	g	0.8262	0.0574	0.0101	1.516e-08	++++-++-++-++++?+?+++++++-++	0.7392	38693.1
rs2613498	1	72752939	t	c	0.1738	-0.0574	0.0101	1.519e-08	----+--+--+----?-?-------+--	0.7388	38693.1
rs11030119	11	27728102	a	g	0.2999	0.0472	0.0083	1.523e-08	++++++--++++++++?+++++++++++	0.6063	38160
rs618759	1	177885488	a	g	0.6776	-0.0455	0.008	1.53e-08	-+-+---+--+-+----+----+-----	0.0663	39618
rs6720422	2	25371558	a	g	0.4308	-0.0467	0.0083	1.541e-08	-+--------+-+---?+----------	0.9636	38160.1
rs13335003	16	19905083	a	g	0.1832	-0.0575	0.0102	1.554e-08	---+---+-+--+--???---+--+---	0.8185	37235
rs13388961	2	25400665	a	g	0.7539	0.051	0.009	1.555e-08	++++-+-++-++-+++?+++++++++++	0.7717	38159.9
rs12614078	2	25440710	a	c	0.2039	-0.0544	0.0096	1.563e-08	----+----+--+---?-----------	0.7982	38160
rs111574713	2	25443100	t	c	0.2042	-0.0544	0.0096	1.57e-08	----+----+--+---?-----------	0.8095	38160.1
rs2815757	1	72764289	t	c	0.8263	0.0573	0.0101	1.573e-08	++++-++-++-++++?+?+++++++-++	0.7385	38693
rs2613497	1	72753825	a	t	0.1736	-0.0568	0.01	1.577e-08	----+--+--+------+-------+--	0.7802	39618
rs2568957	1	72764430	a	g	0.1737	-0.0573	0.0101	1.578e-08	----+--+--+----?-?-------+--	0.7406	38693
rs836969	12	50265853	t	c	0.6859	0.0467	0.0083	1.586e-08	++-+-+++++++++++?+-+++++++-+	0.2783	38160
rs2568953	1	72753956	t	c	0.1741	-0.0573	0.0101	1.594e-08	----+--+--+----?-?-------+--	0.7355	38693.1
rs2384093	2	25401627	a	g	0.754	0.051	0.009	1.607e-08	++++-+-++-++-+++?+++++++-+++	0.7708	38160
rs35692468	2	25432750	a	g	0.7954	0.0548	0.0097	1.609e-08	++++-++++-++-+0+?++++?++?+++	0.7625	37210
rs13426812	2	25400726	t	c	0.2463	-0.051	0.009	1.631e-08	----+-+--+--+---?-----------	0.7712	38160.1
rs706798	12	50266164	a	g	0.6657	0.0461	0.0082	1.636e-08	++-+++++++++++++?+-+++++++-+	0.3151	38160
rs836970	12	50264802	a	g	0.6859	0.0468	0.0083	1.641e-08	++++-+++++++++++?+-+++++++-+	0.3513	38160.1
rs2815764	1	72754123	a	g	0.1733	-0.0567	0.01	1.643e-08	----+--+--+------+-------+--	0.7957	39618
rs11661876	18	57889652	a	g	0.2438	0.05	0.0089	1.66e-08	+++++++-++-+--+-++-+-+++++++	0.2393	39618.1
rs1077641	2	25123665	a	g	0.3271	0.0454	0.008	1.698e-08	++++-+++++++-+-++-+++-++-+++	0.1628	39618.1
rs72807681	2	25343797	t	g	0.2794	0.0482	0.0085	1.73e-08	++++++++++-+-++-+-+++++-++++	0.8356	39618
rs1968482	2	25086858	t	c	0.6733	-0.0454	0.0081	1.75e-08	----+-------+-+--+---+--+---	0.2443	39618
rs34874247	1	72744950	c	g	0.8216	0.0563	0.01	1.773e-08	++++-++-++-++++?+?+++++++-++	0.6905	38692.9
rs10196507	2	25348584	a	g	0.6677	-0.047	0.0083	1.788e-08	----------+-+--+?+-----+----	0.7053	38160
rs58084604	18	57849429	t	c	0.2265	0.0526	0.0093	1.797e-08	++++-++-++-+--+-++-+-??+?+++	0.06868	37034.9
rs112649642	2	25446899	a	g	0.2044	-0.0543	0.0096	1.83e-08	----+----+--+---?-----------	0.8162	38160
rs953442	18	57797485	t	c	0.7649	-0.0513	0.0091	1.903e-08	-------+--+-+--?-?--+?--?--+	0.09984	37743.1
rs12036473	1	74979975	a	t	0.6068	-0.0452	0.008	1.905e-08	------++-++----???+-------+-	0.9059	37235
rs4854328	2	617150	t	c	0.3792	-0.0454	0.0081	1.953e-08	-+----------+---?---++----+-	0.7187	38160
rs2045438	18	57881362	t	c	0.2519	0.049	0.0087	1.985e-08	+++++++-++-+--+-++-+-+++++++	0.4722	39618
rs2168708	18	57907311	t	g	0.2485	0.05	0.0089	2.015e-08	+++++++-++-+--+-?+-+-+++++++	0.3563	38159.9
rs12960928	18	57897803	t	c	0.7508	-0.0491	0.0088	2.051e-08	-------+--+-++-+--+-+-------	0.3832	39618
rs7575831	2	618360	a	c	0.3832	-0.0459	0.0082	2.06e-08	-+----------+--???--+-----+-	0.8103	37235
rs116377258	1	110131521	a	g	0.9628	-0.1176	0.021	2.084e-08	----+----+----+---+---+-----	0.4855	39618.1
rs12322798	12	49708654	a	g	0.2072	0.0535	0.0095	2.111e-08	++++++--++-++++-+--+-+++++++	0.8013	39618
rs11684619	2	25078859	a	g	0.3221	0.0453	0.0081	2.124e-08	++++-+++++++-+-++-+++-++-+++	0.241	39618
rs7944119	11	27722298	t	g	0.3035	0.0466	0.0083	2.142e-08	+++-++--++++++++?+++++++++++	0.614	38160
rs61446045	2	25444146	a	g	0.7955	0.0545	0.0097	2.168e-08	++++-++++-++-+++?++++?++?+++	0.7756	37210
rs4411340	12	50255629	t	c	0.4607	-0.0483	0.0086	2.183e-08	-+-----+-+--?---?++-----+-+-	0.392	37104
rs916484	2	25082588	a	c	0.6776	-0.0452	0.0081	2.201e-08	----+-------+-+--+---+--+---	0.2399	39617.9
rs916486	2	25082629	a	c	0.3224	0.0452	0.0081	2.202e-08	++++-+++++++-+-++-+++-++-+++	0.2396	39617.9
rs35051342	11	27634373	c	g	0.2044	-0.0527	0.0094	2.205e-08	--------+++-+--?-?----------	0.2604	38693
rs2028195	2	25398953	t	g	0.2498	-0.0512	0.0091	2.209e-08	----+-+--+--+-0-?----?--?---	0.8244	37209.9
rs10767654	11	27640223	t	g	0.2088	-0.0527	0.0094	2.242e-08	--------+++-++-?-?------+---	0.3175	38693
rs523288	18	57848369	a	t	0.7721	-0.0522	0.0093	2.254e-08	----+--+--+-++-+--+-+??-?---	0.08588	37035
rs7228753	18	57734101	a	g	0.2564	0.0491	0.0088	2.28e-08	+++++++--+-++-+?+?++-+++++++	0.283	38693.1
rs4613074	16	19942527	t	c	0.8111	0.0562	0.0101	2.293e-08	+++-+++-++++++++?-++++++-+++	0.6895	38160
rs72853661	2	25439262	t	c	0.7952	0.0537	0.0096	2.306e-08	+++++++++-++-+-+?+++++++++++	0.8157	38159.9
rs11168970	12	49709747	t	c	0.793	-0.0534	0.0096	2.311e-08	------++--+----+-++-+-------	0.8036	39618
rs13384165	2	541207	t	c	0.082	-0.0777	0.0139	2.347e-08	----------+--+--------------	0.2735	39618.1
rs512898	1	177888429	t	c	0.6779	-0.0449	0.008	2.353e-08	-+-+---+--+-+----+----+-----	0.07073	39618.1
rs67194783	18	57890743	t	c	0.2488	0.0489	0.0088	2.386e-08	+++++++-++-+--+-++-+-+++++++	0.3854	39618
rs1317448	2	524774	a	c	0.9147	0.0758	0.0136	2.405e-08	++++++++++-++-++++++++++++++	0.4218	39725
rs9646255	16	19975601	a	t	0.2164	-0.0551	0.0099	2.413e-08	---+---+-+--+---?----?--?---	0.5842	37209.9
rs617763	1	177885238	t	c	0.3225	0.0454	0.0081	2.427e-08	+-+-+++-++-+-++?+?++++-+++++	0.06398	38693
rs11665052	18	57908675	a	g	0.7503	-0.0497	0.0089	2.431e-08	-------+--+-++-+?-+-+-------	0.3614	38160
rs685233	1	177869941	a	g	0.6792	-0.0449	0.0081	2.442e-08	-+-+---+--+-+----+----+-----	0.07592	39618
rs58792474	2	541463	a	g	0.918	0.0784	0.0141	2.444e-08	++++++++++-++-+++++++?++?+++	0.1949	38668
rs7234864	18	57734857	t	c	0.2565	0.0489	0.0088	2.471e-08	+++++++-++-++-+?+?++-+++++++	0.2802	38693
rs73146356	2	547638	a	g	0.0819	-0.0778	0.014	2.489e-08	----------+--+--------------	0.2855	39618
rs879048	11	27638934	a	c	0.7912	0.0525	0.0094	2.506e-08	++++++++---+--+?+?++++++-+++	0.319	38693
rs61888762	11	27709630	c	g	0.6904	-0.046	0.0083	2.548e-08	-+-+--++--------?-----------	0.4717	38160
rs72771023	16	19892565	t	c	0.8692	0.0633	0.0114	2.552e-08	+++-+++-++++-++?+?+++-++-+++	0.7798	38693
rs73146344	2	540077	a	t	0.918	0.0774	0.0139	2.615e-08	++++++++++-++-++++++++++++++	0.2736	39618
rs4665290	2	25445885	a	g	0.7931	0.0542	0.0097	2.685e-08	++++-++++-++-+++?++++?++?+++	0.7867	37210
rs2336059	12	50239459	a	g	0.3606	-0.0455	0.0082	2.706e-08	-+--------------?-+-------+-	0.4526	38160
rs113256009	2	25446797	t	c	0.7955	0.0541	0.0097	2.715e-08	++++-++++-++-+++?++++?++?+++	0.7706	37209.9
rs144916872	2	25125902	t	g	0.107	0.0715	0.0129	2.762e-08	+++++++----+--+-++++++++-+++	0.3831	39618
rs13393389	2	536269	a	t	0.0819	-0.0772	0.0139	2.785e-08	----------+--+--------------	0.278	39618
rs3820933	2	24962252	a	g	0.2142	-0.0513	0.0092	2.792e-08	----+--+--+---++-++-+-------	0.4257	39618
rs2030323	11	27728539	a	c	0.2092	-0.0523	0.0094	2.795e-08	-------++-+-++-+?+-++---+---	0.429	38160
rs643971	12	50283465	a	g	0.4697	0.0442	0.008	2.838e-08	++++-+++++++-++???-++-++-+-+	0.07537	37234.9
rs67713315	18	57888746	a	g	0.7508	-0.0486	0.0088	2.841e-08	-------+--+-++-+--+-+-------	0.3929	39617.9
rs7582597	2	25395053	t	c	0.7542	0.0509	0.0092	2.854e-08	++++-+-++-++-+++?++++?++?+++	0.7474	37210
rs13432822	2	535522	t	c	0.0818	-0.0771	0.0139	2.88e-08	----------+--+--------------	0.2784	39618
rs7238484	18	57735552	t	g	0.2601	0.0485	0.0087	2.922e-08	+++++++--+-+-++?+?++-++++++-	0.3152	38693.1
rs12575096	11	27708844	a	g	0.7957	0.0528	0.0095	2.935e-08	+++++++--+-+--+-?++--+++-+++	0.348	38160
rs66488932	16	19978715	a	g	0.2229	-0.0538	0.0097	2.939e-08	---+---+-+--+---?-------+---	0.4763	38160
rs72769587	16	19858906	t	c	0.8744	0.063	0.0114	2.939e-08	+++-+++-++++-++++++++-++-+++	0.8832	39618
rs55909205	16	19859851	t	c	0.8744	0.063	0.0114	2.94e-08	+++-+++-++++-++++++++-++-+++	0.8832	39618
rs8084085	18	57754018	t	c	0.7602	-0.0509	0.0092	3.008e-08	-------+--+-++-+----+??-?--+	0.02446	37035
rs2864823	2	532756	t	c	0.9182	0.0768	0.0139	3.112e-08	++++++++++-++-++++++++++++++	0.2765	39618
rs10767664	11	27725986	a	t	0.79	0.0532	0.0096	3.136e-08	+?+++++--+-+--+???++-+++-+++	0.3491	36692
rs12790234	11	27708963	a	g	0.7905	0.0522	0.0094	3.141e-08	+++++++--+-+--+-?-++-+++-+++	0.4646	38160
rs114670539	2	207064335	t	c	0.0545	0.0991	0.0179	3.157e-08	+-++++--++-+-+++++++--+++++-	0.1719	39618
rs2815748	1	72816147	a	g	0.825	0.0557	0.0101	3.178e-08	++++-++-+-+++++?+?+++++++-++	0.5395	38693.1
rs11503617	12	49705308	a	t	0.7749	-0.0512	0.0093	3.184e-08	------++--+-+----++-+-------	0.7254	39618
rs143956188	11	27707032	a	g	0.2095	-0.0522	0.0094	3.187e-08	-------++-+-++-+?+--+---+---	0.4634	38160
rs4923466	11	27706565	a	c	0.2095	-0.0522	0.0094	3.192e-08	-------++-+-++-+?+--+---+---	0.4632	38160
rs13415127	2	530804	t	c	0.0818	-0.0767	0.0139	3.192e-08	----------+--+--------------	0.2763	39618
rs4130524	2	535179	t	c	0.0818	-0.0777	0.014	3.201e-08	----------+--+-------?--?---	0.1975	38668
rs117567901	11	27706040	t	c	0.7905	0.0522	0.0094	3.21e-08	+++++++--+-+--+-?-++-+++-+++	0.4629	38160
rs2119117	2	24984135	a	g	0.2167	-0.0518	0.0094	3.218e-08	----+--+--+---++?++-+-------	0.4004	38160
rs1488830	11	27636885	t	c	0.7921	0.052	0.0094	3.282e-08	++++++++---+-++?+?++++++-+++	0.3141	38693
rs1457489	18	57861961	a	g	0.2541	0.0484	0.0088	3.3e-08	+++++++--+-+--+-++-+-+++++++	0.2242	39618
rs9314364	8	28103444	t	g	0.6724	-0.0442	0.008	3.3e-08	---++--+---------+---+-+-+--	0.1034	39725
rs7481311	11	27583129	t	c	0.2196	0.0523	0.0095	3.309e-08	+?+??+-+++?+?+-?+?-+-++++-++	0.209	36145
rs988748	11	27724745	c	g	0.211	-0.0526	0.0095	3.31e-08	-------++-+-++-???-++---+---	0.4073	37235
rs13402232	2	25433545	t	c	0.7993	0.0533	0.0096	3.319e-08	+++++++++-++--++?+++++++++++	0.7748	38160
rs7231987	18	57739840	t	g	0.255	0.0486	0.0088	3.34e-08	+++++++-++-+-++?+?++-++++++-	0.3574	38693
rs533543	1	177869590	a	c	0.683	-0.0448	0.0081	3.363e-08	-+-+---+--+-+----+----++----	0.053	39618.1
rs9941245	16	19916895	t	g	0.8168	0.0551	0.01	3.371e-08	+++-+++-+-++-++???+++-++-+++	0.859	37338
rs11644668	16	19847092	a	t	0.8747	0.0629	0.0114	3.379e-08	+++-+++-++++-++++++++-++-+++	0.8899	39617.9
rs2720293	12	50175380	a	g	0.7173	-0.0502	0.0091	3.399e-08	------+-----+---?----++-----	0.09627	38160
rs11894248	2	24856759	a	g	0.7519	0.0486	0.0088	3.406e-08	++++-++-++-+++--+-++-+-+++++	0.5785	39618
rs2613507	1	72834503	a	g	0.175	-0.055	0.01	3.424e-08	----+--+-+-------+-------+--	0.6996	39618
rs4782292	16	19866760	a	c	0.8733	0.0626	0.0114	3.466e-08	+++-+++-++++-++++++++-++-+++	0.89	39618
rs12737564	1	72739527	a	c	0.8207	0.055	0.01	3.471e-08	++++-++-++-++++?+?+++++++-++	0.6881	38693
rs11664883	18	57877800	a	t	0.2496	0.0482	0.0087	3.474e-08	+++++++-++-+--+-++-+-+++++++	0.4149	39618
rs11865578	16	19871982	a	g	0.1267	-0.0634	0.0115	3.484e-08	---+---+----+--?-?---+--+---	0.8315	38693
rs1942867	18	57736270	a	g	0.2598	0.0482	0.0087	3.496e-08	+++++++--+-+-++?+?++-++++++-	0.3156	38693
rs13107325	4	103188709	t	c	0.0698	0.0953	0.0173	3.513e-08	+++++++-++?-?++??+-++-++-+++	0.2911	36677
rs7567564	2	24856103	a	t	0.7521	0.0486	0.0088	3.517e-08	++++-++-++-+++--+-++-+-+++++	0.6066	39618
rs13383974	2	541079	a	c	0.0751	-0.0797	0.0145	3.519e-08	----------+-++--------------	0.1229	39617.9
rs10208441	2	534818	t	c	0.0818	-0.0766	0.0139	3.556e-08	----------+--+--------------	0.2701	39618
rs2815747	1	72821126	t	g	0.8251	0.0555	0.0101	3.562e-08	++++-++-+-+++++?+?+++++++-++	0.5788	38693
rs7926362	11	27707486	a	c	0.2097	-0.052	0.0094	3.601e-08	-------++-+-++-+?+--+---+---	0.4723	38160.1
rs4782289	16	19859332	a	g	0.1265	-0.0626	0.0114	3.608e-08	---+---+----+--------+--+---	0.8917	39618
rs10177480	2	547662	a	g	0.0838	-0.0767	0.0139	3.616e-08	----------+--+--------------	0.3182	39618
rs1942872	18	57868365	t	c	0.2501	0.0483	0.0088	3.633e-08	+++++++-++-+--+-++-+-+++++++	0.419	39618.1
rs2722946	8	28109970	a	g	0.674	-0.0449	0.0082	3.644e-08	---++--+---------+-----+-+--	0.07334	39617.9
rs2613504	1	72835740	a	g	0.825	0.0548	0.01	3.658e-08	++++-++-+-+++++++-+++++++-++	0.7024	39618
rs6691271	1	74982886	a	t	0.6118	-0.0444	0.0081	3.677e-08	------++-++----???--------+-	0.9179	37235
rs2614117	8	28109439	c	g	0.6748	-0.0449	0.0082	3.688e-08	---++--+---------+-----+-+--	0.07676	39618
rs34376163	1	72738699	t	c	0.8208	0.0548	0.01	3.791e-08	++++-++-++-++++?+?+++++++-++	0.6949	38693
rs28744588	2	24958213	t	c	0.2145	-0.0508	0.0092	3.795e-08	----+--+--+---++-++-+-+-----	0.3784	39618
rs12958167	18	57863469	t	g	0.7497	-0.0481	0.0088	3.852e-08	-------+--+-++-+--+-+-------	0.3996	39618
rs2720295	12	50171714	a	c	0.6259	-0.0469	0.0085	3.862e-08	-+--------+-+--???----------	0.7898	37235
rs41280328	1	110136884	t	c	0.964	-0.1195	0.0217	3.902e-08	----+----+---?+---+---+-----	0.4238	38043
rs72705206	1	110172176	t	c	0.0355	0.1173	0.0214	3.903e-08	++++-++++-++++-+++-+++-+++++	0.2737	39618
rs10177468	2	547620	t	g	0.0837	-0.0765	0.0139	4.019e-08	----------+--+--------------	0.3144	39617.9
rs73910207	2	525879	t	c	0.0819	-0.0761	0.0139	4.028e-08	----------+--+--------------	0.2763	39618
rs6484321	11	27705905	t	g	0.2112	-0.0517	0.0094	4.067e-08	-------++-+-++-+?---+---+---	0.4816	38160
rs67236923	12	49700674	a	g	0.7774	-0.0507	0.0092	4.077e-08	------++--+-+----+--+-------	0.719	39618
rs113274210	16	19907817	c	g	0.8226	0.0562	0.0102	4.1e-08	+++-+++-+-++-+++?++++-++-+++	0.8341	38160
rs2815749	1	72814783	a	g	0.1763	-0.0545	0.0099	4.105e-08	----+--+-+-------+---?--?+--	0.6091	38775
rs4782295	16	19874012	a	g	0.1277	-0.0624	0.0114	4.121e-08	---+---+----+--------+--+---	0.7603	39618
rs10207642	2	25135254	a	g	0.2095	0.0531	0.0097	4.137e-08	+-++-+++++++-+++?-+++?++?+++	0.7385	37210
rs60034874	2	546541	t	c	0.0836	-0.0764	0.0139	4.148e-08	----------+--+--------------	0.3154	39618.1
rs623130	1	177871886	t	c	0.6794	-0.0446	0.0081	4.158e-08	-+-+---+--+-+--?-?----+-----	0.0829	38693
rs1320367	2	524451	t	c	0.0821	-0.0761	0.0139	4.168e-08	----------+--+------------+-	0.2858	39618.1
rs576101	1	177873383	a	t	0.3205	0.0446	0.0081	4.17e-08	+-+-+++-++-+-++?+?++++-+++++	0.08187	38693
rs17024258	1	110147321	t	c	0.038	0.1149	0.0209	4.177e-08	++++-++++-++++-+++-+++-+++++	0.5503	39618.1
rs12641981	4	45179883	t	c	0.4405	0.044	0.008	4.187e-08	+?+??+---+++?+++?++++?++?+++	0.6983	34819
rs1829469	11	27730556	a	g	0.801	0.0529	0.0097	4.208e-08	++++++++---+--+-?-+--+++++++	0.3687	38160
rs112769848	2	558552	t	c	0.9294	0.0859	0.0157	4.228e-08	++++++++++-+++++?+++++++++-+	0.4745	38160
rs13405471	2	525193	t	g	0.0819	-0.076	0.0139	4.228e-08	----------+--+--------------	0.2766	39618
rs73430668	11	27613419	t	c	0.22	0.0501	0.0091	4.241e-08	+-++++-+++++-+-+++-+-++++-++	0.1187	39617.9
rs1317447	2	524826	t	c	0.0819	-0.0759	0.0139	4.276e-08	----------+--+--------------	0.2775	39618
rs4508555	2	24949904	a	g	0.2149	-0.0507	0.0092	4.278e-08	----+--+--+---++-++-+-------	0.3564	39618
rs604388	1	177877979	t	c	0.6765	-0.0446	0.0081	4.299e-08	-+-+---+--+-+--?-?----+-----	0.06695	38693
rs72807682	2	25343820	a	g	0.2764	0.0474	0.0087	4.326e-08	++++++++++-+-++-+-+++?+-?+++	0.7702	38668
rs671596	1	177869287	t	c	0.6768	-0.0446	0.0081	4.329e-08	-+-+---+--+-+--?-?----+-----	0.06692	38693
rs12288512	11	27747671	a	g	0.2035	0.0527	0.0096	4.338e-08	+-++++--+++++++???++++++++++	0.9269	37235
rs4780830	16	19864321	t	g	0.1258	-0.0628	0.0115	4.349e-08	---+---+----+--?-?---+--+---	0.8544	38692.9
rs72769590	16	19864835	t	c	0.1258	-0.0628	0.0115	4.371e-08	---+---+----+--?-?---+--+---	0.8545	38692.9
rs2903487	2	603157	a	g	0.3579	-0.0456	0.0083	4.372e-08	-+----------+--???--+??-?-+-	0.7253	34652
rs4782294	16	19867021	t	c	0.1267	-0.0614	0.0112	4.377e-08	---+---+----+--------+--+---	0.8931	39724
rs10852521	16	53804965	t	c	0.4917	-0.042	0.0077	4.402e-08	----+-+++---+-+-?-+--?-+?---	0.04382	37315
rs12273363	11	27744859	t	c	0.7945	-0.0518	0.0095	4.433e-08	-+----++-------???----------	0.9416	37340
rs2613505	1	72835410	t	c	0.8255	0.0551	0.0101	4.433e-08	++++-++-+-+++++?+?+++++++-++	0.6358	38692.9
rs1317449	2	524298	a	g	0.0821	-0.076	0.0139	4.438e-08	----------+--+------------+-	0.2918	39618
rs7299812	12	49729460	a	g	0.8181	-0.0584	0.0107	4.439e-08	----+--+--+-+---?+--+-------	0.3326	38159.9
rs17041983	2	546610	t	c	0.9164	0.0763	0.0139	4.457e-08	++++++++++-++-++++++++++++++	0.3137	39618
rs67254472	2	25443580	a	t	0.8015	0.0534	0.0098	4.472e-08	+++++++++-++--++?+++++++++++	0.8389	38160
rs7241535	18	57738602	t	g	0.7405	-0.0479	0.0087	4.5e-08	-------++-+-+--?-?--+------+	0.3139	38693
rs921971	18	57861663	t	c	0.7507	-0.0474	0.0087	4.513e-08	-------++-+-++-+--+-+-------	0.3255	39723
rs17024393	1	110154688	t	c	0.9622	-0.1149	0.021	4.525e-08	----+----+----+---+---+-----	0.5548	39618
rs186713513	2	617306	a	g	0.5545	0.0462	0.0085	4.541e-08	+-++++++++++?+++?+++--++++++	0.7216	37103.9
rs72705210	1	110178922	a	g	0.0354	0.1175	0.0215	4.558e-08	++++-++++-++++-+++-+++-+++++	0.2541	39618.1
rs72705208	1	110177509	c	g	0.9646	-0.1173	0.0215	4.587e-08	----+----+----+---+---+-----	0.2459	39618
rs7205054	16	19943026	c	g	0.8119	0.0556	0.0102	4.594e-08	+++-+++-+++++++???++++++-+++	0.7859	37235
rs10798578	1	177856925	t	c	0.6418	-0.0434	0.0079	4.596e-08	-+-+---+----+--?-?+-+-+++-+-	0.3801	38693
rs1993709	1	72838529	a	g	0.1747	-0.055	0.0101	4.656e-08	----+--+-+-----?-?-------+--	0.6451	38693
rs2613508	1	72833582	t	c	0.8258	0.0544	0.01	4.713e-08	++++-++-+-+++++++-+++++++-++	0.6909	39617.9
rs10767647	11	27567392	a	g	0.7821	-0.0503	0.0092	4.809e-08	-+----+-----+-----+-+----+--	0.1491	39618
rs34020954	1	72742387	t	c	0.1787	-0.0539	0.0099	4.821e-08	----+--+--+------+-------+--	0.691	39618
rs12292980	11	27734349	a	g	0.3109	0.0458	0.0084	4.845e-08	+-++++--+++++++???++++++++++	0.6781	37235
rs13414548	2	530290	t	c	0.0819	-0.0747	0.0137	4.905e-08	----------+--+--------------	0.2514	39724
rs13130484	4	45175691	t	c	0.44	0.0422	0.0077	4.928e-08	+++-++---+++++++?++++?++?+++	0.8289	37314
rs2613500	1	72819884	t	c	0.1736	-0.0544	0.01	4.956e-08	----+--+-+-------+-------+--	0.6397	39618
rs2613503	1	72839774	a	c	0.8253	0.0549	0.0101	5.036e-08	++++-++-+-+++++?+?+++++++-++	0.6537	38692.9
rs893770	2	24954954	t	g	0.2153	-0.0502	0.0092	5.06e-08	----+--+--+---++-++-+-+-----	0.3654	39618.1
rs1550383	2	24931288	c	g	0.7695	0.0502	0.0092	5.15e-08	++++-++-++-+++--?+-++?++?+++	0.5242	37210
rs7296975	12	50255165	a	g	0.4046	-0.0447	0.0082	5.179e-08	----------------?++-------+-	0.1693	38160.1
rs12967135	18	57849023	a	g	0.2274	0.0514	0.0094	5.27e-08	++++-++-++-+--+?+?-+-??+?+++	0.1024	36110
rs1013402	11	27712381	a	g	0.6926	-0.0456	0.0084	5.272e-08	-+-+--++-------???----------	0.4745	37235
rs34723450	1	72724409	a	c	0.8203	0.0541	0.01	5.423e-08	++++-++-++-++++?+?+++++++-++	0.7251	38692.9
rs12988548	2	25323083	a	t	0.7266	0.0477	0.0088	5.432e-08	++++++++++++-+++++++--++++++	0.9097	39618
rs62142355	2	24971119	a	t	0.2151	-0.0507	0.0093	5.453e-08	----+--+--+---++-++-+?--?---	0.3847	38668
rs6736819	2	527946	t	c	0.0824	-0.0752	0.0138	5.456e-08	----------+--+--------------	0.2834	39617.9
rs11783771	8	28091463	a	c	0.3152	0.0448	0.0082	5.464e-08	+++--++-+++++++++-+++-+-+-++	0.1171	39618.1
rs28406841	16	19934822	a	g	0.8142	0.0554	0.0102	5.498e-08	+++-+++-+++++++???-+++++-+++	0.7253	37234.9
rs55633509	2	25148620	a	t	0.8325	-0.0599	0.011	5.515e-08	---------+--++--?-----+-+---	0.08199	38160
rs1460940	1	72814617	a	g	0.8229	0.0546	0.0101	5.523e-08	++++-++-+-+++++++-+++?++?-++	0.6054	38668.1
rs7488343	12	49689597	c	g	0.2772	0.0478	0.0088	5.531e-08	++++++--++-+-++-?--+-+++-+++	0.3918	38160
rs1009388	2	25391101	c	g	0.2576	0.0494	0.0091	5.551e-08	+--+++++++-+--++?++++++-++++	0.3781	38160
rs13410997	2	25433439	a	g	0.2013	-0.0529	0.0097	5.572e-08	---------+--+++-?----?--?---	0.7331	37210
rs72769575	16	19843517	t	c	0.8741	0.0623	0.0115	5.634e-08	+++-+++-++++-++?+?+++-++-+++	0.8589	38693
rs11641786	16	19844865	t	g	0.1257	-0.0624	0.0115	5.642e-08	---+---+----+--?-?---+--+---	0.8493	38693
rs4780829	16	19855985	a	g	0.1267	-0.0623	0.0115	5.651e-08	---+---+----+--?-?---+--+---	0.8655	38693
rs934778	2	25389224	a	g	0.7123	-0.0456	0.0084	5.681e-08	--+-------+-++---+----------	0.4656	39722
rs11030121	11	27736207	t	c	0.3111	0.0455	0.0084	5.801e-08	+-++++--+++++++???++++++++++	0.678	37235
rs17309930	11	27748493	a	c	0.2045	0.0516	0.0095	5.818e-08	+-++++--++++++++?-++++++++++	0.9444	38160.1
rs35737697	8	28059813	t	c	0.5834	0.0419	0.0077	5.851e-08	+++--++-+++++++++-+-++++++++	0.9228	39618
rs1561288	2	25369002	t	c	0.2519	-0.0469	0.0087	5.921e-08	----+-+--+--+---------------	0.8193	39721
rs7107410	11	27551388	t	c	0.2183	0.0504	0.0093	5.925e-08	+-+-++-+++++-+-?+?-+-++++-++	0.09637	38692.9
rs7206790	16	53797908	c	g	0.5291	-0.0435	0.008	5.93e-08	----+++++-----+???---------0	0.07879	37235
rs1131924	11	27516789	t	c	0.709	-0.0505	0.0093	6.046e-08	-+-+--+-----+---?-+-+----+--	0.1748	38160.1
rs115319174	2	207066474	c	g	0.0526	0.0983	0.0181	6.048e-08	+-++++--++-+-+++++++--+++++-	0.1758	39618
rs7127239	11	27547379	a	c	0.2187	0.0502	0.0093	6.134e-08	+-+-++-+++++-+-?+?++-++++-++	0.08414	38693
rs527065	1	177868882	t	g	0.3184	0.0442	0.0082	6.136e-08	+-+-+++-++-+-++?+?++++-+++++	0.09324	38693
rs2076885	2	25000901	a	g	0.2462	-0.0487	0.009	6.161e-08	----+--+--+---+-?++-+-+-----	0.3155	38160
rs112893582	12	49703983	a	c	0.7986	-0.0519	0.0096	6.172e-08	------++--+--+-+-++-+-------	0.6671	39618
rs12419462	11	27623309	a	g	0.2202	0.05	0.0092	6.243e-08	+-++++-+++++-+-?+?-+-++++-++	0.08572	38693.1
rs72769573	16	19841876	c	g	0.1262	-0.062	0.0115	6.442e-08	---+---+----+--?-?---+--+---	0.8558	38692.9
rs12957347	18	57751014	t	c	0.7617	-0.0504	0.0093	6.478e-08	-?-??--+--+-+--+----+??-?--+	0.009594	35672
rs34893777	18	57905216	a	t	0.7503	-0.0486	0.009	6.533e-08	-------+--+-++-???+-+-------	0.4797	37235
rs77207027	2	25097075	a	g	0.1081	0.0681	0.0126	6.568e-08	+++-++++---+--+-++++++++++++	0.2182	39618
rs12967878	18	57826570	t	c	0.7818	-0.0514	0.0095	6.644e-08	---++--+--+-++-+--+-+??-?---	0.09354	37035
rs7550711	1	110082886	t	c	0.0368	0.1178	0.0218	6.677e-08	+?++-++++-?+?+-+++-+++-+++++	0.4374	37860.9
rs719189	2	24875778	a	c	0.7881	0.0502	0.0093	6.686e-08	++++-++-++-+++--+--+-+-+++++	0.2013	39618.1
rs11642339	16	19832798	t	g	0.1259	-0.0616	0.0114	6.795e-08	---+---+----+--------+--+---	0.8958	39617.9
rs56239133	2	24987881	t	c	0.2173	-0.051	0.0095	6.843e-08	----+--+--+---++?++-+?--?---	0.3309	37210.1
rs113936771	1	110200152	a	g	0.9655	-0.122	0.0226	6.946e-08	----+----+----+---+---++----	0.2724	39618
rs56293917	2	24936417	a	g	0.7073	0.0461	0.0086	7.061e-08	++++-++--+-+++-+?-+++?++?+++	0.6483	37210.1
rs62142311	2	24864686	a	g	0.209	-0.0504	0.0094	7.144e-08	----+--++-+---++-++-+-+-----	0.1926	39618
rs8083289	18	57893618	c	g	0.75	-0.0476	0.0088	7.174e-08	-------+--+-++-?-?+-+-------	0.5081	38693
rs13250569	8	28058645	a	g	0.5831	0.042	0.0078	7.223e-08	+++--++-+++++++++-+-++++++++	0.9363	39618
rs11647020	16	53823990	t	c	0.5172	0.0423	0.0079	7.248e-08	+-++-+---+-+++++?--++?++?+++	0.2044	37210
rs61765646	1	72723211	a	t	0.1796	-0.0542	0.0101	7.402e-08	----+--+--+----?-?---?--?+--	0.6908	37742.9
rs62025051	16	19829999	a	g	0.1651	-0.0582	0.0108	7.566e-08	-------+----++-???---?--?---	0.4118	36284.9
rs12361806	11	27619569	a	g	0.2195	0.0497	0.0093	7.672e-08	+-++++-+++++-+-?+?-+-++++-++	0.07739	38693.1
rs4409780	11	27532234	t	c	0.2184	0.0493	0.0092	7.711e-08	+-+-++-+++++-+-+++++-++++-++	0.1598	39617.9
rs6718083	2	25362194	a	g	0.2509	-0.0472	0.0088	7.87e-08	----+-+--+--+---------------	0.8108	39618
rs6484314	11	27550199	a	g	0.2184	0.0498	0.0093	7.963e-08	+-+-++-+++++-+-?+?++-++++-++	0.101	38693
rs9886614	8	28099667	c	g	0.6763	-0.0436	0.0081	7.988e-08	---++--+---------+---+-+-+--	0.1049	39618
rs73112143	12	49691250	a	g	0.7886	-0.0515	0.0096	8.058e-08	------++--+-----?+--+-------	0.5558	38160.1
rs6760328	2	25077991	t	c	0.6951	-0.0442	0.0082	8.076e-08	----+-------+-+-?+---++-+---	0.1933	38265
rs591120	1	177902753	c	g	0.4367	0.0427	0.008	8.103e-08	+++??+++++?+?++?+?+++-++++--	0.4846	36581
rs12964203	18	57903604	t	c	0.7511	-0.0476	0.0089	8.13e-08	-------+--+-++-???+-+-------	0.4578	37341
rs34274959	1	72686292	a	g	0.8147	0.0529	0.0099	8.176e-08	++++-+--+--++++?+?+++-+-+-++	0.4829	38693
rs115454275	1	110192045	t	c	0.0347	0.1166	0.0217	8.183e-08	++++-++++-++++-+++-+++-+++++	0.234	39617.9
rs61742688	16	19883364	a	g	0.1304	-0.0625	0.0116	8.227e-08	-?-??--+----+--?-?---+--+---	0.6225	37252
rs115067791	2	207033306	a	g	0.0526	0.096	0.0179	8.235e-08	+-++++--++-+-+++++-+--++-++-	0.2749	39618
rs6745938	2	527972	t	c	0.9219	0.0762	0.0142	8.345e-08	++++++++++-++-++++++++++++++	0.2171	39617.9
rs9926784	16	19941968	t	c	0.8127	0.0545	0.0102	8.398e-08	+++-+++-+++++++???++++++-+++	0.804	37235
rs35476226	18	57885593	c	g	0.7491	-0.0473	0.0088	8.431e-08	-------+--+-++-?-?+-+-------	0.5154	38692.9
rs9886609	8	28099383	a	c	0.3229	0.0435	0.0081	8.533e-08	+++--++-+++++++++-+++-+-+-++	0.08834	39618
rs1038660	11	27549392	a	c	0.2185	0.0496	0.0093	8.722e-08	+-+-++-+++++-+-?+?++-++++-++	0.1027	38693
rs17791703	2	24881271	t	c	0.7849	0.0492	0.0092	8.738e-08	++++-++-++-+++--+--+-+-+++++	0.2087	39618
rs9886492	8	28099770	a	g	0.676	-0.0434	0.0081	8.751e-08	---++--+---------+---+-+-+--	0.1173	39618
rs1873078	11	27548003	c	g	0.2185	0.0496	0.0093	8.766e-08	+-+-++-+++++-+-?+?++-++++-++	0.1026	38693
rs12970134	18	57884750	a	g	0.251	0.0484	0.0091	8.804e-08	+?+??++-++?+?-+?+?-+-+++++++	0.314	36143
rs17735622	2	24907098	c	g	0.215	-0.0493	0.0092	8.89e-08	----+--+--+---++-++-+-+-----	0.2133	39618
rs11674421	2	24906195	c	g	0.2149	-0.0493	0.0092	8.895e-08	----+--+--+---++-++-+-+-----	0.2104	39617.9
rs13401689	2	24971338	a	g	0.215	-0.0502	0.0094	8.956e-08	----+--+--+---++?++-+-------	0.4534	38159.9
rs55803937	2	24981763	a	g	0.7822	0.0505	0.0094	9.063e-08	++++-++-++-+++--?--+-?++?+++	0.331	37210.1
rs836959	12	50275137	a	c	0.2892	-0.0436	0.0082	9.136e-08	--+---------+-+-----------+-	0.07299	39721
rs143328507	2	24971480	c	g	0.2143	-0.0502	0.0094	9.162e-08	----+--+--+---++?++-+-------	0.4626	38160.1
rs10835197	11	27607543	t	c	0.2197	0.0494	0.0092	9.168e-08	+-++++-+++++-+-?+?-+-++++-++	0.06204	38693
rs12725081	1	72682718	a	t	0.1855	-0.0526	0.0098	9.249e-08	----+-++-++----?-?---+-+-+--	0.5014	38693
rs2614115	8	28108344	a	t	0.3203	0.044	0.0082	9.296e-08	+++--++-+++++++++-+++++-+-++	0.1051	39618
rs7008686	8	28098720	a	g	0.5905	-0.0424	0.0079	9.306e-08	---++--+--------?+-----+-+--	0.1406	38160
rs55797001	2	24980582	a	t	0.7852	0.0501	0.0094	9.393e-08	++++-++-++-+++--?--+-+++++++	0.4685	38160
rs2614113	8	28106606	t	c	0.3275	0.0438	0.0082	9.421e-08	+++--++-+++++++++-+++?+-?-++	0.09811	38668
rs6996068	8	28094807	t	c	0.3229	0.0433	0.0081	9.449e-08	+++--++-+++++++++-+++-+-+-++	0.0927	39618.1
rs6719538	2	25149531	a	g	0.089	0.0751	0.0141	9.461e-08	+++-+++----+--+-+++++?-+?+++	0.5096	38668
rs112215462	2	25143408	c	g	0.1994	0.0532	0.01	9.466e-08	+++-+++-++++--++?+++-+-+-+++	0.05257	38159.9
rs7012040	8	28096371	t	c	0.3228	0.0433	0.0081	9.534e-08	+++--++-+++++++++-+++-+-+-++	0.09292	39618.1
rs12681090	8	28087891	t	c	0.6771	-0.0434	0.0081	9.559e-08	---++--+---------+---+-+-+--	0.09562	39618
rs7002331	8	28096888	t	c	0.677	-0.0433	0.0081	9.566e-08	---++--+---------+---+-+-+--	0.09424	39618
rs7125904	11	27543003	t	g	0.2186	0.0495	0.0093	9.573e-08	+-+-++-+++++-+-?+?++-++++-++	0.09925	38693
rs10112778	8	28095291	a	g	0.3229	0.0433	0.0081	9.587e-08	+++--++-+++++++++-+++-+-+-++	0.09312	39618.1
rs7010836	8	28096383	a	g	0.3251	0.0427	0.008	9.592e-08	+++--++-+++++++++-+++-+-+-++	0.1083	39719
rs10099875	8	28095050	a	c	0.6771	-0.0433	0.0081	9.601e-08	---++--+---------+---+-+-+--	0.09306	39618.1
rs2614114	8	28106784	t	c	0.3303	0.043	0.0081	9.607e-08	+++--++-+++++++++-+++?+-?-++	0.1166	38775
rs7816330	8	28093152	t	g	0.3229	0.0433	0.0081	9.616e-08	+++--++-+++++++++-+++-+-+-++	0.09414	39618
rs2282288	1	177892552	a	g	0.3587	-0.0424	0.0079	9.672e-08	-+-+------+----?-?+---+-----	0.7486	38693.1
rs12549755	8	28089596	t	c	0.6772	-0.0434	0.0081	9.732e-08	---++--+---------+---+-+-+--	0.09407	39618
rs111854376	2	25439758	t	c	0.1975	-0.053	0.0099	9.752e-08	----+----+--+-+-?-----------	0.8087	38160
rs6484308	11	27521802	t	g	0.2176	0.0496	0.0093	9.909e-08	+-+-++-+++++-+-?+?++-++++-++	0.1367	38693
rs4923454	11	27594129	a	g	0.7802	-0.0493	0.0092	9.959e-08	-+----+-----+-+?-?+-+----+--	0.06627	38693
rs76533282	2	25089575	t	g	0.9137	-0.0741	0.0139	1.004e-07	---+-----++-?+-+------+-+---	0.1766	38561.9
rs10938397	4	45182527	a	g	0.5597	-0.043	0.0081	1.006e-07	-?-??-+++-?-?---?-------+---	0.7628	35505
rs2049045	11	27694241	c	g	0.1721	-0.0549	0.0103	1.015e-07	--------+++-++--?--++-------	0.3341	38159.9
rs12269837	11	27593570	a	g	0.7804	-0.0492	0.0092	1.016e-07	-+----+-----+-+?-?+-+----+--	0.06733	38693
rs6497416	16	19876145	t	c	0.127	-0.0611	0.0115	1.018e-07	---+---+----+--?-?---+--+---	0.711	38692.9
rs57241318	12	49713839	t	c	0.2349	0.0486	0.0091	1.025e-07	++++-+--++-+-++++-++-+++-+++	0.6297	39618.1
rs13387998	2	512327	t	c	0.0782	-0.0759	0.0143	1.032e-07	------------++----+-------+-	0.1948	39618
rs34472009	1	177835638	t	c	0.1896	0.0517	0.0097	1.035e-07	+++-+++-++++-++++++-++-++--+	0.1503	39618
rs62142310	2	24862242	a	c	0.7898	0.0492	0.0092	1.043e-07	++++-++-++-+++--+--+-+-+++++	0.2222	39618
rs11665563	18	57876034	t	c	0.2507	0.0469	0.0088	1.046e-07	+++++++-++-+--+?+?-+-+++++++	0.5519	38693
rs57703366	2	25364914	a	g	0.3077	0.0441	0.0083	1.047e-07	++++++++++-++-+++-++++++++++	0.7207	39618
rs2352802	11	27547826	a	g	0.7823	-0.0493	0.0093	1.048e-07	-+-+--+-----+-+?-?--+----+--	0.1023	38693
rs4665764	2	25357487	c	g	0.2501	-0.0469	0.0088	1.05e-07	----+-+--+--+---------------	0.8538	39618
rs749046	2	24815624	a	g	0.7946	0.05	0.0094	1.05e-07	++++-++--+-+++--+--+-+-+++++	0.2531	39618
rs580294	1	177900616	t	c	0.5778	0.0401	0.0075	1.053e-07	+-+-++++++-+-+++++++++-+++++	0.5157	39721
rs7556799	2	522593	a	g	0.084	-0.0731	0.0137	1.059e-07	----------+--+------------+-	0.3468	39618
rs7575791	2	522601	t	c	0.916	0.0731	0.0137	1.059e-07	++++++++++-++-++++++++++++-+	0.3468	39618
rs925946	11	27667202	t	g	0.3044	0.0448	0.0084	1.06e-07	+?+??+--++?+?++?-?++++++++++	0.3537	36144
rs60423777	2	25357237	t	c	0.2502	-0.0469	0.0088	1.068e-07	----+-+--+--+---------------	0.856	39618
rs13393059	2	25376025	t	c	0.308	0.0441	0.0083	1.077e-07	++++++++++-++-++--++++++++++	0.7255	39618.1
rs11075987	16	53815161	t	g	0.5028	-0.043	0.0081	1.084e-07	-?-??-+++-?-?-+???+----+----	0.0341	34580
rs10767645	11	27544739	t	g	0.2178	0.0493	0.0093	1.089e-07	+-+-++-+++++-+-?+?++-++++-++	0.09988	38693
rs12678500	8	28088201	t	c	0.3226	0.0432	0.0081	1.105e-07	+++--++-+++++++++-+++-+-+-++	0.09749	39617.9
rs34940719	1	72693786	a	g	0.1865	-0.0522	0.0098	1.115e-07	----+-++-++----?-?---+-+-+--	0.4341	38693.1
rs4665766	2	25366130	a	t	0.7499	0.0467	0.0088	1.12e-07	++++-+-++-++-+++++++++++++++	0.8146	39617.9
rs656384	18	57906500	a	g	0.2531	0.0478	0.009	1.122e-07	+++++++-++-+--+-?+-+-?++?+++	0.4003	37210.1
rs11894404	2	24918283	a	g	0.2114	-0.0492	0.0093	1.152e-07	----+--+--+---++-++-+-+-----	0.2649	39617.9
rs621391	12	50288615	c	g	0.5133	0.0426	0.008	1.162e-07	++-+-+++++++-++???-++-++-+-+	0.08959	37235
rs17066564	18	57750897	t	c	0.7589	-0.0491	0.0093	1.186e-07	-------+--+-++-?-?--+??-?--+	0.05458	36109.9
rs66463418	16	19978804	a	g	0.2229	-0.0519	0.0098	1.201e-07	---+---+-+--+--???------+---	0.547	37235
rs1858601	1	72674434	t	g	0.1872	-0.0526	0.0099	1.201e-07	----+-++-++----?-?---?-+?+--	0.4872	37743
rs184033703	2	206956138	a	g	0.0549	0.0912	0.0172	1.217e-07	+-++++--++++-+++++-+--++-++-	0.1674	39618
rs73910206	2	523461	a	g	0.9157	0.0725	0.0137	1.228e-07	++++++++++-++-++++++++++++-+	0.3306	39618
rs17066562	18	57749028	a	g	0.7588	-0.0491	0.0093	1.23e-07	-------+--+-++-?-?--+??-?--+	0.05553	36110
rs56120127	16	19977851	t	g	0.7762	0.0518	0.0098	1.232e-07	+++-+++-+-++-++???++++++-+++	0.548	37234.9
rs4299252	18	57751185	a	t	0.7566	-0.049	0.0093	1.238e-07	-------+--+-++-?-?--+??-?--+	0.05437	36110
rs447016	12	50277399	a	c	0.2913	-0.0437	0.0083	1.239e-07	--+---------+-+---+-------+-	0.08322	39618
rs7240566	18	57744189	a	g	0.7583	-0.0491	0.0093	1.243e-07	-------+--+-++-?-?--+??-?--+	0.05214	36110.1
rs688671	18	57867526	a	g	0.7415	-0.0466	0.0088	1.244e-07	-------+--+-++-?-?+-+-------	0.4549	38693
rs11892647	2	25379019	t	c	0.3081	0.0439	0.0083	1.244e-07	++++++++++-++-++--++++++++++	0.7333	39617.9
rs11215427	11	115093438	c	g	0.2613	-0.0461	0.0087	1.245e-07	-----+-------+--?+--+-------	0.2929	38160
rs77014480	2	25371332	t	c	0.251	-0.0466	0.0088	1.26e-07	----+-+--+--+---------------	0.82	39617.9
rs35166058	1	72702806	a	g	0.186	-0.0515	0.0098	1.263e-07	----+-++-++------+---+-+-+--	0.5108	39617.9
rs4665768	2	25372229	a	c	0.252	-0.0464	0.0088	1.264e-07	----+-+--+--+---------------	0.8182	39618
rs62140560	2	25008278	t	c	0.2147	-0.0497	0.0094	1.267e-07	----+--+--+---++?++-+-------	0.5831	38160
rs6545812	2	25129385	a	g	0.0953	0.0719	0.0136	1.269e-07	+++-++++---+--+-++++++-+-+++	0.286	39618
rs11648188	16	19978039	t	c	0.2226	-0.0518	0.0098	1.281e-07	---+---+-+--+--???------+---	0.5593	37235
rs57324979	2	25007318	a	g	0.2154	-0.0497	0.0094	1.29e-07	----+--+--+---++?++-+-------	0.5847	38160
rs56215558	2	25105736	c	g	0.0843	0.0734	0.0139	1.292e-07	+++-+++++--+--+-++++++-+-+++	0.241	39618
rs11692059	2	24852874	a	g	0.2104	-0.0488	0.0092	1.306e-07	----+--+--+---++-++-+-+-----	0.2179	39618
rs8091524	18	57751960	t	c	0.7624	-0.049	0.0093	1.314e-07	-------+--+-++-?-?--+??-?--+	0.07185	36110
rs59117299	2	25140389	t	c	0.0889	0.0731	0.0138	1.322e-07	+++-++++---+--+-++++++-+-+++	0.5269	39618
rs57457259	2	25378422	t	c	0.3081	0.0438	0.0083	1.324e-07	++++++++++-++-++--++++++++++	0.7367	39618
rs423934	12	50277412	t	c	0.291	-0.0438	0.0083	1.333e-07	--+---------+-+---+-------+-	0.07972	39618
rs141029407	2	25112701	a	g	0.0844	0.0739	0.014	1.345e-07	+++-++++---+--+-++++++-+-+++	0.2526	39618.1
rs6567154	18	57754901	t	c	0.2433	0.0489	0.0093	1.357e-07	+++++++-++-+--+?+?++-??+?++-	0.05357	36110
rs190572876	2	206972042	a	g	0.0524	0.0952	0.0181	1.358e-07	+-++++--++++-+++++-+--++-++-	0.2414	39618
rs78989253	2	25137784	c	g	0.9109	-0.0729	0.0138	1.364e-07	---+----+++-++-+------+-+---	0.5525	39618
rs55985335	2	25092226	a	g	0.9146	-0.0726	0.0138	1.366e-07	---+-----++-++-+------+-+---	0.191	39618
rs2070760	12	49690337	t	c	0.7883	-0.0524	0.0099	1.367e-07	------++--+--?--?+--+?--?---	0.6293	35635
rs12954782	18	57864092	c	g	0.7479	-0.0466	0.0088	1.367e-07	-------+--+-++-?-?+-+-------	0.5478	38692.9
rs1561289	2	25369040	t	c	0.2533	-0.0461	0.0087	1.37e-07	----+-+--+--+--------?--?---	0.7479	38775
rs10098959	8	28100307	a	c	0.6757	-0.0432	0.0082	1.371e-07	---++--+---------+---?-+?+--	0.1116	38668
rs80083564	11	27733143	t	g	0.1171	0.0663	0.0126	1.374e-07	++++++-++++-+++???+++++++-+-	0.07384	37235
rs34110521	18	57780326	a	g	0.7647	-0.0491	0.0093	1.377e-07	-------+--+-+--?-?--+??-?--+	0.08584	36110
rs57794904	2	25346568	t	c	0.2244	-0.0486	0.0092	1.396e-07	------+--+------------------	0.9808	39618
rs74624011	2	25044100	t	c	0.0791	0.0739	0.014	1.399e-07	+++-+++-+-+---+-++++++-+++++	0.197	39618
rs75698381	2	25143873	a	g	0.0852	0.074	0.0141	1.4e-07	+++-++++---+--+-++++++-+-+++	0.4273	39618
rs1814391	2	25047484	a	g	0.0791	0.0739	0.014	1.415e-07	+++-+++-+-+---+-++++++-+++++	0.2054	39618.1
rs55784418	2	25139230	a	g	0.9146	-0.0738	0.014	1.42e-07	---+----+++-++-+------+-+---	0.4271	39618
rs80306571	2	25094075	a	g	0.0854	0.0724	0.0138	1.428e-07	+++-+++++--+--+-++++++-+-+++	0.1915	39618
rs34289700	1	72660048	a	c	0.8135	0.0514	0.0098	1.446e-07	++++-+--+--++++?+?+++-+-+-++	0.4844	38693
rs79451155	2	25096506	t	c	0.0854	0.0724	0.0138	1.446e-07	+++-+++++--+--+-++++++-+-+++	0.1923	39618
rs35918659	18	57761524	t	c	0.2355	0.0499	0.0095	1.465e-07	+++++++-++-+--+?+?++-??+?++-	0.06106	36110
rs72852524	2	25346687	a	t	0.7756	0.0485	0.0092	1.487e-07	++++++-++-++++++++++++++++++	0.9809	39618
rs56003423	2	25102600	t	c	0.0853	0.0723	0.0138	1.496e-07	+++-+++++--+--+-++++++-+-+++	0.214	39617.9
rs55649310	2	24833463	t	g	0.7899	0.0486	0.0092	1.502e-07	++++-++--+-+++--+--+-+-+++++	0.1992	39618
rs3731633	2	25366380	a	t	0.2494	-0.0464	0.0088	1.507e-07	----+-+--+--+---------------	0.81	39618
rs2276597	2	25344464	a	g	0.2244	-0.0485	0.0092	1.529e-07	------+--+------------------	0.9789	39618.1
rs62140836	2	24709032	a	g	0.2091	-0.0489	0.0093	1.546e-07	----+--++-+---++-++-+-+-----	0.1532	39617.9
rs34319362	8	28058078	a	g	0.4176	-0.0411	0.0078	1.549e-07	---++--+---------+-+--------	0.9298	39618
rs56157935	2	25090375	t	c	0.9143	-0.0722	0.0138	1.562e-07	---+-----++-++-+------+-+---	0.1907	39618
rs1519480	11	27675712	t	c	0.678	-0.0423	0.0081	1.567e-07	-+-+--++--------+-----------	0.5973	39618
rs34840702	1	72662959	t	c	0.1867	-0.0513	0.0098	1.59e-07	----+-++-++----?-?---+-+-+--	0.4738	38693
rs684227	1	177901741	a	g	0.4646	-0.0396	0.0076	1.59e-07	---------------+-----++---+-	0.6377	39618
rs61765640	1	72684333	a	g	0.1883	-0.0514	0.0098	1.6e-07	----+-++-++----?-?---+-+-+--	0.4403	38693
rs17800401	2	25104931	c	g	0.0853	0.072	0.0137	1.603e-07	+++-+++++--+--+-++++++-+-+++	0.2219	39618.1
rs138964083	2	206908054	t	c	0.0541	0.0908	0.0173	1.614e-07	+-++++--++++--++++-+--++-++-	0.1801	39618
rs138095446	2	25053019	c	g	0.9213	-0.0739	0.0141	1.621e-07	---+---+-+-+++-+------+-----	0.21	39618
rs11125733	2	24871798	a	g	0.7905	0.0489	0.0093	1.634e-07	++++-++-++-+++--+--+-+-+++++	0.2553	39618.1
rs35483896	1	72695431	t	g	0.1858	-0.051	0.0097	1.635e-07	----+-++-++------+---+-+-+--	0.4921	39618
rs7124442	11	27677041	t	c	0.6854	-0.0424	0.0081	1.646e-07	-+-+--++--------+-----------	0.586	39618
rs7599796	2	25110222	t	c	0.9058	-0.0705	0.0135	1.649e-07	---+----+++-++-+------+-+---	0.2169	39618.1
rs7817972	8	28093589	a	c	0.3242	0.0429	0.0082	1.651e-07	+++--++-+++++++++-+++?+-?-++	0.1147	38668
rs2236746	12	49691567	t	c	0.8138	-0.0514	0.0098	1.66e-07	------++--+--+-+-++-+-------	0.5512	39618
rs10913461	1	177887117	c	g	0.3845	0.0404	0.0077	1.665e-07	+-+-+++-++-+-++++--+++-+-+++	0.4243	39618
rs183235241	2	206915620	a	g	0.0307	0.1385	0.0265	1.671e-07	+-++++-+++++--++++++--++-+++	0.2282	39618
rs7518576	1	177849963	t	c	0.6197	-0.0413	0.0079	1.693e-07	-+-+---+--+-+--?-?+---+-+---	0.3462	38693.1
rs62144583	2	25003478	c	g	0.7818	0.0495	0.0095	1.701e-07	++++-++-++-+++--?--+-?-+?+++	0.4343	37209.9
rs7596747	2	25350321	t	g	0.2244	-0.0482	0.0092	1.706e-07	------+--+------------------	0.9846	39618
rs115583825	2	25052582	t	c	0.0793	0.0737	0.0141	1.709e-07	+++-+++-+-+---+-++++++-+++++	0.2412	39618
rs4936323	11	115091119	t	g	0.7387	0.0456	0.0087	1.714e-07	+++++-+++++++-++?-++-+++++++	0.325	38159.9
rs9692849	8	28088887	a	g	0.3218	0.043	0.0082	1.727e-07	+++--++-+++++++++-+++?+-?-++	0.1119	38668.1
rs17792389	2	24924438	a	c	0.7875	0.0484	0.0093	1.735e-07	++++-++-++-+++--+--+-+-+++++	0.3099	39618
rs4665285	2	25381470	c	g	0.2277	-0.0477	0.0091	1.736e-07	----+-+--+------------------	0.9089	39618
rs2083116	2	25347469	t	c	0.2241	-0.0482	0.0092	1.736e-07	------+--++-----------------	0.9817	39618.1
rs55722016	2	24874883	a	t	0.7904	0.0487	0.0093	1.752e-07	++++-++-++-+++--+--+-+-+++++	0.2579	39618
rs7975431	12	49706839	a	g	0.8018	-0.0505	0.0097	1.771e-07	------++--+--+-+-++-+-------	0.6866	39618
rs62142346	2	24912506	a	c	0.2113	-0.0485	0.0093	1.781e-07	----+--++-+---++-++-+-+-----	0.2253	39618.1
rs2457463	10	70315687	t	g	0.9617	-0.187	0.0358	1.794e-07	?--??---??--?-???---++-+----	0.4942	25485
rs35944729	1	72666431	a	t	0.813	0.0512	0.0098	1.8e-07	++++-+--+--++++?+?+++-+-+-++	0.4578	38693
rs41281519	2	25065274	t	g	0.9184	-0.0732	0.014	1.834e-07	---+---+-+---+-+------+-----	0.1834	39618.1
rs17792437	2	24927765	a	c	0.7872	0.0483	0.0093	1.837e-07	++++-++-++-+++--+--+-+-+++++	0.317	39618
rs13135092	4	103198082	a	g	0.9263	-0.0876	0.0168	1.851e-07	-------+--++----?-+--+------	0.3328	38160.1
rs61732745	2	25141434	a	g	0.0908	0.0719	0.0138	1.868e-07	+++-++++---+--+-++++++-+-+++	0.5488	39618
rs75973443	2	25108124	t	c	0.0848	0.0717	0.0138	1.872e-07	+++-+++++--+--+-++++++-+-+++	0.2454	39617.9
rs138166226	2	25107616	a	g	0.0848	0.0717	0.0138	1.895e-07	+++-+++++--+--+-++++++-+-+++	0.2467	39617.9
rs76087690	2	25065799	a	g	0.0816	0.0731	0.014	1.895e-07	+++-+++-+-+++-+-++++++-+++++	0.1817	39618.1
rs9699942	1	72681835	a	g	0.1861	-0.0506	0.0097	1.951e-07	----+-++-++------+---+-+-+--	0.5061	39618
rs6712986	2	25126046	t	c	0.8868	-0.0665	0.0128	1.977e-07	--------+++-++-+-----?--?---	0.3607	38667.9
rs28543370	12	49694534	a	g	0.8128	-0.0505	0.0097	2.006e-07	------++--+--+-+-++-+-------	0.6683	39618
rs744078	2	24934842	a	c	0.785	0.0479	0.0092	2.018e-07	++++-++-++-+++--+--+-+-+++++	0.3574	39618
rs62142344	2	24912056	t	c	0.2127	-0.0481	0.0092	2.027e-07	----+--+--+---++-++-+-+-----	0.2885	39617.9
rs13391139	2	521279	a	g	0.0848	-0.0711	0.0137	2.046e-07	----------+--+------------+-	0.3776	39617.9
rs2903485	2	520929	a	g	0.0849	-0.0711	0.0137	2.066e-07	----------+--+------------+-	0.3776	39618
rs12313435	12	49705577	a	c	0.8024	-0.0503	0.0097	2.074e-07	------++--+--+-+-++-+-------	0.6836	39618
rs2044148	2	24737833	a	g	0.211	-0.0473	0.0091	2.079e-07	----+--++-+---++-++-+-+-----	0.1843	39721
rs7127507	11	27714884	t	c	0.6793	-0.0431	0.0083	2.086e-07	-+-+--++-------???----------	0.5291	37235
rs12304800	12	49703850	t	c	0.8028	-0.0502	0.0097	2.106e-07	------++--+--+-+-++-+-------	0.7078	39618
rs8223	1	177897959	t	c	0.4211	-0.0396	0.0076	2.126e-07	-+-+------+-+---------+-----	0.5447	39618
rs13406109	2	520542	t	c	0.9152	0.071	0.0137	2.127e-07	++++++++++-++-++++++++++++-+	0.3761	39618
rs6710503	2	24971176	a	g	0.267	-0.0451	0.0087	2.145e-07	----+-++--+---+-?+--+-+-+---	0.4824	38160.1
rs113581509	1	110187031	t	c	0.0351	0.1113	0.0215	2.148e-07	++++-++++-++++-+++-+++-+++++	0.2935	39618
rs79988608	2	25058941	a	g	0.0814	0.0726	0.014	2.149e-07	+++-+++++-+++-+-++++++-+++++	0.1917	39618
rs117281273	8	42981400	c	g	0.9688	0.1284	0.0248	2.172e-07	+-++++++++++++?-+--+++++-+++	0.7387	37850.9
rs11865086	16	30130493	a	c	0.4701	-0.0393	0.0076	2.228e-07	---+------+-------+-----+-+-	0.6409	39722
rs13003881	2	25352091	a	g	0.2241	-0.0478	0.0092	2.23e-07	------+--+--+---------------	0.9791	39618.1
rs12786130	11	27505954	t	c	0.7715	-0.0462	0.0089	2.283e-07	-+-+--+-----+-----+-+----+--	0.2989	39720
rs1808124	11	27686904	t	c	0.3415	0.0427	0.0083	2.287e-07	+-+-++--++++++++?+++-+++++++	0.5299	38160
rs145484204	2	25053066	t	c	0.9216	-0.0732	0.0141	2.299e-07	---+---+-+-+++-+------+-----	0.2195	39618
rs59615345	2	24778897	a	g	0.21	-0.0478	0.0093	2.311e-07	----+--++-+---++-++-+-+-----	0.1824	39618
rs10767658	11	27672252	c	g	0.3034	0.0426	0.0082	2.354e-07	+-+-++--++++-++?-?++++++++++	0.4433	38693
rs11693687	2	24902072	a	g	0.7874	0.0478	0.0092	2.355e-07	++++-++-++-+++--+--+-+-+++++	0.2544	39618
rs77760734	2	25059745	t	g	0.9186	-0.0724	0.014	2.367e-07	---+---+-+---+-+------+-----	0.2089	39618
rs76979480	2	24795883	t	c	0.7898	0.0478	0.0092	2.4e-07	++++-++--+-+++--+--+-+-+++++	0.1779	39618.1
rs6746786	2	500367	t	c	0.0849	-0.0724	0.014	2.406e-07	----------+--+----+--+----+-	0.4639	39618
rs62142285	2	24793097	a	g	0.7898	0.0477	0.0092	2.412e-07	++++-++--+-+++--+--+-+-+++++	0.178	39618
rs28857010	12	49694387	a	g	0.1878	0.05	0.0097	2.414e-07	++++++--++-++-+-+--+-+++++++	0.6759	39617.9
rs4142027	1	177833576	t	c	0.1831	0.0515	0.01	2.416e-07	+++-+++-++++-++?+?+-++--+--+	0.04285	38693
rs6663622	1	177867608	a	g	0.6153	-0.0403	0.0078	2.445e-07	-+-+---+--+-+--?-?+---+-+---	0.4061	38693
rs11648621	16	19973008	a	g	0.7809	0.0513	0.0099	2.459e-07	+++-+++-+-++-++???+++?++?+++	0.5956	36285
rs11691065	2	24765479	a	g	0.7904	0.0477	0.0092	2.469e-07	++++-++--+-+++--+--+-+-+++++	0.1828	39618
rs112365800	2	25084013	a	g	0.0879	0.0706	0.0137	2.478e-07	+++-+++++--+--+-++++++-+-+++	0.2371	39618
rs12317532	12	49694784	c	g	0.8115	-0.0497	0.0096	2.478e-07	------++--+--+-+-++-+-------	0.6759	39618
rs62142274	2	24764393	a	c	0.2095	-0.0477	0.0092	2.479e-07	----+--++-+---++-++-+-+-----	0.1819	39618
rs10157480	1	177873333	a	g	0.3824	0.0397	0.0077	2.5e-07	+-+-+++-++-+-++?+?-+++---+++	0.4211	38798
rs62142284	2	24790666	a	g	0.7904	0.0477	0.0093	2.501e-07	++++-++--+-+++--+--+-+-+++++	0.1869	39618
rs2014182	2	25347908	t	c	0.2251	-0.0481	0.0093	2.506e-07	------+--+-----------?--?---	0.9616	38668
rs116762317	2	25086133	a	g	0.9127	-0.0706	0.0137	2.522e-07	---+-----++-++-+------+-+---	0.2157	39617.9
rs1415084	1	177870257	a	t	0.6181	-0.0403	0.0078	2.533e-07	-+-+---+--+-+--?-?+---+-+---	0.4402	38693.1
rs142767588	2	24758386	a	g	0.2094	-0.0477	0.0093	2.546e-07	----+--++-+---++-++-+-+-----	0.1859	39617.9
rs77605687	2	25085887	a	g	0.0873	0.0706	0.0137	2.551e-07	+++-+++++--+--+-++++++-+-+++	0.2154	39618
rs141837986	2	206974754	a	g	0.0536	0.0924	0.0179	2.555e-07	+-++++--++-+-++++--+--++-++-	0.1465	39618
rs74370213	2	25098374	a	c	0.9113	-0.0706	0.0137	2.557e-07	---+-----++-++-+------+-+---	0.162	39618
rs75239292	2	25086314	t	g	0.0873	0.0706	0.0137	2.561e-07	+++-+++++--+--+-++++++-+-+++	0.2163	39618
rs11682506	2	24728141	t	c	0.2104	-0.0478	0.0093	2.563e-07	----+--++-+---++-++-+-+-----	0.1954	39618
rs62142275	2	24767649	a	c	0.7905	0.0477	0.0092	2.572e-07	++++-++--+-+++--+--+-+-+++++	0.1824	39618
rs147165897	12	49704706	a	g	0.8061	-0.0504	0.0098	2.572e-07	------++--+--+-+-++-+-------	0.5646	39618
rs10798577	1	177853220	c	g	0.3828	0.0404	0.0078	2.578e-07	+-+-+++-++-+-++?+?-+++-+-+++	0.434	38693
rs11125673	2	24782836	a	g	0.2095	-0.0476	0.0092	2.587e-07	----+--++-+---++-++-+-+-----	0.1871	39618
rs11646715	16	53824007	a	g	0.5196	0.0408	0.0079	2.592e-07	+-++-+---+-+++++?+-++?++?+++	0.2787	37210
rs11904717	2	24762457	t	c	0.7905	0.0476	0.0092	2.592e-07	++++-++--+-+++--+--+-+-+++++	0.1824	39618.1
rs13036110	2	25350017	t	c	0.2219	-0.0478	0.0093	2.61e-07	------+--+--+---------------	0.9827	39618
rs17734407	2	24730581	a	g	0.7904	0.0477	0.0093	2.613e-07	++++-++--+-+++--+--+-+-+++++	0.1776	39617.9
rs139647585	2	24756060	c	g	0.2095	-0.0476	0.0092	2.634e-07	----+--++-+---++-++-+-+-----	0.184	39617.9
rs60372293	2	24779230	t	g	0.7904	0.0476	0.0093	2.647e-07	++++-++--+-+++--+--+-+-+++++	0.1867	39618
rs7564851	2	615658	a	g	0.3899	-0.0406	0.0079	2.65e-07	-+-------+--+-------+??-?-+-	0.6697	37139
rs62140850	2	24746900	a	g	0.7905	0.0476	0.0092	2.686e-07	++++-++--+-+++--+--+-+-+++++	0.183	39617.9
rs7560005	2	618361	a	g	0.6175	0.0435	0.0085	2.687e-07	+-++++++++++-++???++-??+?+-+	0.8399	34652
rs62140845	2	24735623	a	g	0.7904	0.0476	0.0092	2.687e-07	++++-++--+-+++--+--+-+-+++++	0.1831	39617.9
rs62140849	2	24746198	a	g	0.2095	-0.0476	0.0092	2.688e-07	----+--++-+---++-++-+-+-----	0.183	39617.9
rs11890406	2	24778227	a	g	0.7904	0.0476	0.0093	2.704e-07	++++-++--+-+++--+--+-+-+++++	0.1837	39618
rs61117682	2	25076404	t	c	0.3285	0.0423	0.0082	2.706e-07	++++-+++++++-+-+?---+-++-+++	0.165	38160.1
rs62140848	2	24741143	a	c	0.7904	0.0475	0.0092	2.706e-07	++++-++--+-+++--+--+-+-+++++	0.1829	39618
rs11125632	2	24737412	t	c	0.2095	-0.0475	0.0092	2.711e-07	----+--++-+---++-++-+-+-----	0.1828	39617.9
rs11895918	2	24743472	c	g	0.2095	-0.0475	0.0092	2.716e-07	----+--++-+---++-++-+-+-----	0.1828	39618
rs116493845	2	25075591	a	g	0.0858	0.0711	0.0138	2.719e-07	+++-+++++--+--+-++++++-+-+++	0.1829	39618
rs62142283	2	24787912	t	c	0.2102	-0.0476	0.0093	2.746e-07	----+--++-+---++-++---+-----	0.2092	39618.1
rs111678442	12	49703955	a	g	0.1952	0.05	0.0097	2.75e-07	++++++--++-++-+-+--+-+++++++	0.6924	39618
rs35215534	1	177830626	a	g	0.1826	0.0512	0.01	2.787e-07	+++-+++-++++-++?+?+-++--+--+	0.04349	38693
rs6545953	2	25343468	a	g	0.2522	-0.0463	0.009	2.826e-07	---------+--+-----------+---	0.8609	39618
rs11895626	2	24892032	t	c	0.7876	0.0474	0.0092	2.837e-07	++++-++-++-+++--+--+-+-+++++	0.2454	39618
rs77994977	2	25082207	a	g	0.0876	0.0703	0.0137	2.841e-07	+++-+++++--+--+-++++++-+-+++	0.2081	39618.1
rs12749133	1	177857302	t	c	0.3827	0.0402	0.0078	2.873e-07	+-+-+++-++-+-++?+?-+++-+-+++	0.4587	38693
rs2165740	2	24727019	c	g	0.2098	-0.0476	0.0093	2.876e-07	----+--++-+---++-++-+-+-----	0.1848	39617.9
rs77575852	2	25084303	a	t	0.0874	0.0703	0.0137	2.91e-07	+++-+++++--+--+-++++++-+-+++	0.2132	39618
rs7542	16	30125840	c	g	0.4707	-0.0396	0.0077	2.965e-07	---++-----+-------+-----+-+-	0.7126	39618
rs6692651	1	177854399	a	g	0.3825	0.0402	0.0078	2.973e-07	+-+-+++-++-+-++?+?-+++-+-+++	0.4652	38693
rs11168936	12	49645240	t	c	0.6264	-0.0415	0.0081	2.984e-07	----+-++--+---?-?-+---------	0.06488	36486
rs10913454	1	177852789	a	c	0.618	-0.0402	0.0078	2.997e-07	-+-+---+--+-+--?-?+---+-+---	0.4539	38693
rs1336785	1	177859642	c	g	0.611	-0.0401	0.0078	3.019e-07	-+-+---+----+--?-?+---+++-+-	0.4479	38693.1
rs77225428	2	25083645	a	g	0.9126	-0.0701	0.0137	3.024e-07	---+-----++-++-+------+-+---	0.2124	39618
rs45593334	11	115089440	a	c	0.741	0.0441	0.0086	3.035e-07	+++++-+++++++-+++-++-+++++-+	0.4614	39618
rs4347344	11	27653138	a	g	0.6797	0.0437	0.0085	3.07e-07	+-++++++-+-++++-?+++-+++-+++	0.7105	38160.1
rs1571349	1	177866792	a	g	0.6149	-0.0396	0.0077	3.072e-07	-+-+---+--+-+----++---+-+---	0.4433	39618
rs74639823	2	25041007	t	g	0.9213	-0.0722	0.0141	3.082e-07	---+---+-+-+++-+------+-----	0.2087	39618
rs12787847	11	27506050	t	c	0.228	0.0463	0.0091	3.112e-07	+-+-++-+++++-+++++++-++++-++	0.3219	39617.9
rs4940927	18	57732689	a	g	0.2545	0.046	0.009	3.124e-07	+++++++--+-++++?+?++-??+?+++	0.2741	36212
rs77969210	2	25117540	t	c	0.9195	-0.0738	0.0144	3.138e-07	---+-----++-++-+------+-+---	0.2512	39618
rs13416069	2	25008266	t	c	0.2162	-0.0486	0.0095	3.163e-07	----+--+--+---++?++-+?--?---	0.514	37210
rs56139148	2	24973767	a	t	0.6646	0.0417	0.0082	3.167e-07	+++++++--+-+-++-?--+++-+-+++	0.2874	38160
rs62107261	2	422144	t	c	0.9516	0.1175	0.023	3.17e-07	+-++-+++-?-+-+?-?+-+++++++++	0.5756	36074.1
rs35984555	8	42966262	t	c	0.0385	-0.1136	0.0222	3.182e-07	-+------------?+--+-----+---	0.7614	37851
rs80078501	2	25200871	a	g	0.0837	0.0751	0.0147	3.184e-07	+++-+++++--+--+-?+++++-+-+++	0.3185	38160
rs150175599	2	207468007	t	c	0.0394	0.1065	0.0208	3.19e-07	+-+--++-++++--+-++++++++++++	0.6796	39618
rs10767659	11	27686196	t	g	0.6712	-0.0411	0.008	3.215e-07	-+-+--++--------+-----------	0.5048	39618
rs10202934	2	25359254	t	c	0.2731	-0.0447	0.0088	3.238e-07	---------++---------+?-+?---	0.9439	38668.1
rs28798494	12	49694277	t	c	0.8136	-0.0498	0.0097	3.293e-07	------++--+--+-+-++-+-------	0.6725	39618.1
rs117049232	12	50272063	c	g	0.3137	-0.0432	0.0085	3.308e-07	--+---------+-+-?-+-------+-	0.08796	38160
rs56001375	2	24850724	a	t	0.7892	0.0476	0.0093	3.326e-07	++++-++-++-+++--+--+-?-+?+++	0.1998	38668
rs7605927	2	25375905	c	g	0.7312	0.0443	0.0087	3.375e-07	++++-+-++-+--+++++++++++++++	0.644	39618
rs56383418	2	24849053	a	g	0.7892	0.0476	0.0093	3.398e-07	++++-++-++-+++--+--+-?-+?+++	0.2027	38668
rs17734306	2	24722438	a	g	0.7665	0.0448	0.0088	3.424e-07	++++-+---+-+++--+-++++-+++++	0.3852	39723
rs10798579	1	177860331	a	g	0.6177	-0.0399	0.0078	3.451e-07	-+-+---+--+-+--?-?+---+-+---	0.4407	38693
rs143223375	2	207434727	c	g	0.9605	-0.1061	0.0208	3.455e-07	-+-+---+----++-+------------	0.6419	39618.1
rs148734301	2	25034310	t	c	0.0854	0.0702	0.0138	3.467e-07	+++-+++-+++-----++++++-+++++	0.1444	39618
rs383307	12	50277129	t	g	0.2931	-0.0424	0.0083	3.502e-07	--+---------+-+?-?+-------+-	0.06081	38693
rs6545758	2	25074874	t	c	0.6836	-0.0424	0.0083	3.523e-07	----+-------+-+-?+-+-++-+---	0.2031	38160
rs13410506	2	25023031	a	g	0.3748	-0.041	0.0081	3.528e-07	-+---++++-+----+?-+---------	0.5754	38160
rs10798576	1	177853043	t	g	0.618	-0.0399	0.0078	3.532e-07	-+-+---+--+-+--?-?+---+-+---	0.482	38693
rs11588039	1	177812740	t	c	0.8186	-0.0498	0.0098	3.565e-07	---+---+----+------++-++-++-	0.06031	39618
rs7342318	12	49692639	t	c	0.1879	0.0493	0.0097	3.565e-07	++++++--++-++-+-+--+-+++++++	0.6666	39618.1
rs11215424	11	115087421	a	g	0.7392	0.0445	0.0087	3.594e-07	+++++-+++++++-+-?-++-+++++++	0.4468	38160
rs56336001	2	25014607	t	c	0.0788	0.0717	0.0141	3.604e-07	+++-+++-+-+---+-++++++-+++++	0.2086	39618
rs13393590	2	25147676	t	c	0.79	-0.0488	0.0096	3.611e-07	---+---+----++--?--++-+-+---	0.03149	38160
rs77966139	2	25081711	t	c	0.0874	0.0696	0.0137	3.65e-07	+++-+++++--+--+-++++++-+-+++	0.1956	39618.1
rs2119115	2	24886781	a	c	0.7605	0.0443	0.0087	3.653e-07	++++-++-++-+++--+-++-+-+++++	0.4036	39724
rs112630077	2	25082548	t	c	0.0874	0.0696	0.0137	3.681e-07	+++-+++++--+--+-++++++-+-+++	0.1917	39618
rs74377248	2	25082338	a	c	0.0874	0.0696	0.0137	3.722e-07	+++-+++++--+--+-++++++-+-+++	0.1934	39618.1
rs55951414	2	25079601	a	g	0.0874	0.0696	0.0137	3.734e-07	+++-+++++--+--+-++++++-+-+++	0.1999	39618
rs12507026	4	45181334	a	t	0.5599	-0.0403	0.0079	3.735e-07	---+--+++------???---?--?---	0.9248	36284.9
rs10188516	2	25368005	a	g	0.2681	-0.0442	0.0087	3.752e-07	----+-+--+-++---------------	0.5937	39618
rs61455481	12	49701111	a	g	0.196	0.0493	0.0097	3.771e-07	++++++--++-++-+-+--+-+++++++	0.7061	39617.9
rs80332495	5	19191677	a	g	0.9418	0.1124	0.0221	3.782e-07	+++--++?++++++?+++++-+++++-+	0.863	37707
rs6545954	2	25343469	t	c	0.2518	-0.0459	0.009	3.807e-07	---------+--+-------+---+---	0.8682	39618
rs72792190	2	25051727	a	g	0.8511	-0.0542	0.0107	3.831e-07	-+-+---+-+----++------------	0.6093	39618
rs6497407	16	19832032	t	g	0.7191	0.0437	0.0086	3.861e-07	+++-++++++++-++-+++++-++++++	0.5741	39618.1
rs62140842	2	24732961	t	c	0.2103	-0.0469	0.0092	3.889e-07	----+--++-+---++-++-+-+-----	0.2248	39618
rs17799872	2	25044957	a	g	0.0788	0.0704	0.0139	3.921e-07	+++-+++-+-+---+-++++++-+++++	0.1095	39722
rs7719067	5	153538241	a	g	0.4261	0.0381	0.0075	3.957e-07	+++++++--+++++++-+++++++++-+	0.7659	39721
rs7708584	5	153543466	a	g	0.425	0.0385	0.0076	3.978e-07	+++++++--+++++++-+++++++++-+	0.7766	39618
rs28599560	5	91791853	a	g	0.6124	0.0403	0.008	3.991e-07	++++-++-++++?++-+--+++++++++	0.7667	38562
rs4310564	11	27652858	c	g	0.6955	0.0432	0.0085	4.03e-07	++++++++---++-+-?++-++++-+++	0.6955	38160
rs12790913	11	27511998	a	g	0.2277	0.0463	0.0091	4.042e-07	+-+-++-+++++-++++?-+-++++-++	0.1959	39067
rs4569924	5	153540025	t	c	0.4256	0.0385	0.0076	4.046e-07	+++++++--+++++++-+++++++++-+	0.7643	39618
rs56397001	2	24974223	a	g	0.0812	0.0708	0.014	4.07e-07	+++-+++-+-+-+---++++++-+++++	0.08645	39618
rs9966951	18	57775295	a	g	0.3108	0.0409	0.0081	4.081e-07	+++++++--+-+-++-++++-+++++-+	0.3378	39724
rs34333163	4	103283117	a	g	0.931	-0.0812	0.016	4.088e-07	---+---+--+-----+-+--+--+---	0.478	39618
rs146823532	1	74979126	a	g	0.9665	0.1406	0.0278	4.091e-07	+++-+++++?++++?+?-?-++++++-+	0.7306	35822
rs13114738	4	103284865	t	c	0.0738	0.0775	0.0153	4.132e-07	+++-+++++--+++++-+-+--++-+++	0.6921	39723
rs663640	18	57846077	t	c	0.2054	0.0479	0.0095	4.139e-07	+++--++--+-+--+-++-+-+++++++	0.14	39618
rs11030112	11	27705188	a	g	0.3059	0.0413	0.0082	4.159e-07	+-+-++--++++-+++-+++++++++++	0.3465	39618
rs9954728	18	57801557	c	g	0.6823	-0.0415	0.0082	4.244e-07	----+--+--+-+--+----+-------	0.3205	39618
rs10835201	11	27618265	a	g	0.7677	-0.0452	0.0089	4.259e-07	-+----+-----+-+?-?+-+----+--	0.09725	38798
rs10938398	4	45186139	a	g	0.4376	0.0398	0.0079	4.31e-07	+++-++---++++++???++++++-+++	0.937	37234.9
rs73146351	2	544577	a	g	0.0832	-0.0715	0.0141	4.321e-07	----------+--+-?-?----------	0.4958	38693
rs2278486	2	25057298	c	g	0.7674	0.0479	0.0095	4.335e-07	+-+++++--+-+-+-+?+-+++++-+++	0.7772	38160
rs11835037	12	49698435	t	c	0.1932	0.0482	0.0095	4.358e-07	++++++--++-++-+-+--+-+++++++	0.6665	39618
rs1366219	5	153545698	a	t	0.4249	0.0385	0.0076	4.388e-07	++++-++--+++++++-+++++++++-+	0.7901	39618
rs192026888	2	25028416	a	g	0.0767	0.0727	0.0144	4.412e-07	+++-+++-+-+---+-++++++-+++++	0.2244	39618
rs113536429	12	49679178	c	g	0.2184	0.0478	0.0095	4.414e-07	++++++--++-++-++?--+-+++++++	0.4805	38159.9
rs12315095	12	49698815	t	c	0.1928	0.0482	0.0096	4.477e-07	++++++--++-++-+-+--+-+++++++	0.6686	39618.1
rs36030660	18	57735945	t	c	0.7401	-0.0457	0.0091	4.49e-07	-------++-+-+--?-?--+??-?--+	0.2725	36110
rs11168967	12	49699652	a	g	0.1957	0.0474	0.0094	4.502e-07	++++++--++-++-+-+--+-+++++++	0.7529	39722
rs4940926	18	57732418	t	c	0.2522	0.047	0.0093	4.51e-07	+++++++-++-++-++?+++-??+?+++	0.1822	35577
rs6713532	2	25384833	t	c	0.7288	0.0438	0.0087	4.61e-07	++++-+-++-+--+++++++++++++++	0.706	39618
rs12956871	18	57897702	a	g	0.7502	-0.0456	0.009	4.621e-07	-------+--+-++-+--+-+??-?---	0.3543	37035
rs11676900	2	24895302	a	c	0.2115	-0.0471	0.0094	4.72e-07	----+--+--+---++-++-+?+-?---	0.2066	38667.9
rs4665784	2	25448197	a	g	0.2014	-0.0495	0.0098	4.732e-07	----+----+-++---?-----------	0.6808	38160
rs11030391	11	28644626	a	g	0.6292	0.0397	0.0079	4.732e-07	++++++--+-++-+++-+-++-++-+--	0.001233	39618
rs4922787	11	27507902	t	g	0.7722	-0.0455	0.009	4.755e-07	-+-+--+-----+--?-?--+----+--	0.2091	38798
rs1428120	5	153541904	t	g	0.5713	-0.0384	0.0076	4.779e-07	-------++-------+---------+-	0.7689	39618
rs7136538	12	49697252	a	g	0.1932	0.048	0.0095	4.828e-07	++++++--++-++-+-+--+-+++++++	0.6649	39618
rs7600421	2	25075876	t	g	0.6886	-0.0424	0.0084	4.862e-07	----+-------+-+-?+-+-++-+---	0.1343	38160
rs2099044	5	153548206	t	c	0.4253	0.0384	0.0076	4.875e-07	++++-++--+++++++-+++++++++-+	0.809	39618
rs61442874	2	207520920	a	t	0.7289	-0.0439	0.0087	4.883e-07	------++++--++-+?----+--+---	0.06628	38160
rs297937	12	50291735	c	g	0.5401	-0.0471	0.0094	4.917e-07	----+-+-+-----?-?++-----+---	0.133	36393.1
rs7294873	12	49697798	a	c	0.8066	-0.0479	0.0095	4.96e-07	------++--+--+-+-++-+-------	0.6728	39618
rs10767657	11	27668794	a	c	0.3764	0.0422	0.0084	4.986e-07	+-++++--++++-+++?++++++++-++	0.2149	38160
rs623479	1	177898799	t	c	0.5595	0.0381	0.0076	5.047e-07	+-++++++-+-+-++++++++--+++--	0.5511	39618
rs59617873	2	25023444	t	c	0.7881	0.0482	0.0096	5.088e-07	++++-++--+-+++--?+-+++++++++	0.9066	38160.1
rs17734264	2	24719710	t	c	0.233	-0.0448	0.0089	5.091e-07	----+-+++-+---++-+----+-----	0.3538	39617.9
rs55820598	2	25067294	t	c	0.9095	-0.069	0.0137	5.103e-07	---+---+++-+-+-+------+-----	0.1039	39618
rs4640343	2	24956027	a	c	0.9175	-0.07	0.0139	5.115e-07	---+---+-+-+-+++------+-----	0.09419	39618
rs7715256	5	153537893	t	g	0.5735	-0.0382	0.0076	5.133e-07	-------++-------+---------+-	0.7383	39618
rs56045417	2	24892768	a	g	0.7883	0.0469	0.0093	5.197e-07	++++-++-++-+++--+--+-?-+?+++	0.2008	38668.1
rs1248264	12	50271045	t	g	0.7089	0.0423	0.0084	5.204e-07	++-+++++++++-+-+?+++++++-+-+	0.05984	38160.1
rs6720514	2	24826619	t	c	0.765	0.044	0.0088	5.223e-07	++++-++--+-+++--+-++0+-+++++	0.3717	39725
rs12315130	12	49698738	a	g	0.1926	0.0479	0.0096	5.286e-07	++++++--++-++-+-+--+-+++++++	0.6831	39618
rs11125735	2	24875403	a	g	0.2103	-0.0472	0.0094	5.296e-07	----+--+--+---++-++-+?+-?---	0.2296	38668
rs61023481	12	49698953	a	c	0.1926	0.0479	0.0096	5.303e-07	++++++--++-++-+-+--+-+++++++	0.6582	39618
rs7295247	12	49697873	a	g	0.1948	0.047	0.0094	5.304e-07	++++++--++-++++-+--+-+++++++	0.6822	39723
rs4958702	5	153544512	t	c	0.4271	0.0384	0.0077	5.348e-07	+++++++--+++++++-+++++++++-+	0.8257	39618
rs12731430	1	177809120	a	c	0.8174	-0.049	0.0098	5.354e-07	-+-+---+----+------++-++-++-	0.07417	39618.1
rs10835360	11	28606699	t	c	0.6268	0.0396	0.0079	5.363e-07	++++++--++++-+++-+-++-++-+--	0.03956	39618
rs11030075	11	27627296	c	g	0.7681	-0.0455	0.0091	5.387e-07	-+----+-----+-+?-?+-+----+--	0.1003	38693
rs561634	1	177895763	a	t	0.4396	-0.0384	0.0077	5.388e-07	-+------+-+-+--?-?----+---++	0.4587	38693.1
rs10044136	5	153546808	c	g	0.5728	-0.0382	0.0076	5.393e-07	----+--++-------+---------+-	0.7717	39618
rs7232835	18	57769718	t	c	0.3149	0.0408	0.0082	5.472e-07	++++-++-++-+-++-++++-+++++++	0.3486	39617.9
rs11664369	18	57739072	t	c	0.255	0.0456	0.0091	5.496e-07	+++++++--+-+-++?+?++-??+?++-	0.3053	36110
rs2590943	1	72874456	a	g	0.1786	-0.0487	0.0097	5.499e-07	----+--+-+-----+--+--+-+----	0.8602	39722
rs7564400	2	25349059	t	c	0.2654	-0.0439	0.0088	5.526e-07	------+--+--+-----------+---	0.8682	39618
rs59911983	2	25023442	a	g	0.2114	-0.0485	0.0097	5.535e-07	----+--++-+---++?++---------	0.8798	38160
rs836963	12	50270331	t	g	0.3731	-0.0436	0.0087	5.541e-07	---------+--+-+-?-+-----+-+-	0.5782	38160.1
rs13109272	4	103292422	t	c	0.9304	-0.08	0.016	5.564e-07	---+---+--+-----+-+--+--+---	0.3497	39618
rs925494	4	45187622	t	c	0.4152	0.0423	0.0085	5.589e-07	++++++---+++-+++?-++++++-+++	0.9272	38159.9
rs13403386	2	24723109	c	g	0.7674	0.0446	0.0089	5.613e-07	++++-+---+-+++--+-++++-+++++	0.3651	39618
rs74528305	2	25066379	t	g	0.9175	-0.0699	0.014	5.616e-07	---+---+-+---+-+------+-----	0.1513	39618
rs59009734	16	19830457	a	g	0.1683	-0.0535	0.0107	5.626e-07	-------+----++-+?+---?--?---	0.1786	37210
rs75367830	2	25086725	t	c	0.0853	0.0698	0.014	5.639e-07	+++-+++++--+--+-+++++?-+?+++	0.2227	38668
rs56191263	2	24843330	a	g	0.2329	-0.0446	0.0089	5.716e-07	----+--++-+---++-+--0-+-----	0.3844	39618
rs1942879	18	57788990	t	g	0.6848	-0.0407	0.0082	5.773e-07	----+--+--+-+--+----+-------	0.3637	39618
rs75512388	5	153546492	a	g	0.5676	-0.0387	0.0077	5.781e-07	-------++---?---+---------+-	0.8458	38562
rs6937930	6	55207924	c	g	0.6046	-0.04	0.008	5.784e-07	----+---+------+?-+--?--?+--	0.8016	37210
rs9296780	6	55212064	a	g	0.6061	-0.0401	0.008	5.822e-07	-+--+---+------+?-+--?--?+--	0.826	37210
rs1428121	5	153547495	a	t	0.5725	-0.0381	0.0076	5.97e-07	----+--++-------+---------+-	0.775	39618.1
rs11663816	18	57876227	t	c	0.748	-0.045	0.009	5.985e-07	-------+--+-++-+--+-+??-?---	0.3017	37035
rs13143234	4	103287131	a	g	0.0743	0.0768	0.0154	6.016e-07	+++-+++++--+++++-+-+--++-+++	0.7064	39618
rs55771305	2	24926413	a	t	0.9754	-0.1425	0.0286	6.067e-07	-+-------?-+-+++--------+---	0.047	39299
rs590215	18	57904088	t	c	0.2517	0.0459	0.0092	6.074e-07	+++++++-++-+--+-?+-+-??+?+++	0.3415	35577
rs6713448	2	25055446	t	g	0.8506	-0.0536	0.0107	6.08e-07	-+-+---+-+----++------------	0.6183	39618
rs1248263	12	50271372	t	g	0.7091	0.0421	0.0084	6.081e-07	++-+++++++++-+-+?+++++++-+-+	0.05787	38160
rs2045439	18	57883801	t	c	0.2505	0.045	0.009	6.1e-07	+++++++-++-+--+-++-+-??+?+++	0.3558	37035.1
rs79990615	2	25071787	c	g	0.0828	0.0699	0.014	6.18e-07	+++-+++-+-++--+-++++++-+++++	0.1347	39618
rs892511	1	110078255	c	g	0.9656	-0.1083	0.0217	6.185e-07	-+--+----+----+--++--++-+---	0.5729	39618
rs56188174	2	24840900	t	g	0.2352	-0.0444	0.0089	6.188e-07	----+-+++-+---++-+--+-+-----	0.3403	39618
rs13135688	4	103285906	c	g	0.0744	0.0766	0.0154	6.214e-07	+++-+++++--+++++-+-+--++-+++	0.7076	39618
rs72887113	6	50889791	a	g	0.098	0.0648	0.013	6.227e-07	++++++-++--+---?+?-+++++++++	0.2872	38693.1
rs6900362	6	55212833	t	g	0.3975	0.0395	0.0079	6.23e-07	++++-+++-++++++-?+-+++++--++	0.8461	38160
rs12736514	1	177802424	t	c	0.8116	-0.048	0.0096	6.293e-07	-+-+---+----+------++-+--++-	0.1725	39617.9
rs143367187	2	25027622	c	g	0.8513	-0.053	0.0106	6.346e-07	-+-+---+-+----++------------	0.5407	39618
rs6545952	2	25343374	a	g	0.7406	0.0448	0.009	6.347e-07	++++++-++-++-++++++++?++?+++	0.9177	38668
rs17734650	2	24812163	a	g	0.789	0.0465	0.0093	6.364e-07	++++-++--+-+++--+--+-?-+?+++	0.1561	38668
rs12760319	1	177804191	a	g	0.1883	0.0479	0.0096	6.373e-07	+-+-+++-++++-++++++--+-++--+	0.1705	39617.9
rs144361191	2	25026369	a	g	0.8513	-0.053	0.0106	6.375e-07	-+-+---+-+----++------------	0.5504	39618
rs13390269	2	25068793	a	g	0.0828	0.0695	0.014	6.429e-07	+++-+++-+-+++-+-++++++-+++++	0.1411	39618
rs4303677	2	25221440	t	c	0.0845	0.0731	0.0147	6.445e-07	+++-+++++--+--+-?+++++-+-+++	0.3535	38160
rs113939247	2	25029179	a	g	0.1486	0.053	0.0107	6.448e-07	+-+-+++-+-++++--++++++++++++	0.5293	39618
rs55914216	2	25012072	a	g	0.149	0.053	0.0107	6.516e-07	+-+-+++-+-+++---++++++++++++	0.5335	39618
rs7577562	2	25348492	a	g	0.7328	0.0436	0.0088	6.606e-07	++++++-++--+-+++++++++++-+++	0.8653	39618
rs1336980	9	129377855	c	g	0.3635	0.0395	0.0079	6.608e-07	++++++++++-+--+-+++++?++?-++	0.7825	38668
rs7757288	6	55205502	a	g	0.6087	-0.0398	0.008	6.64e-07	-+--+---+------+?-+--?--?+--	0.7495	37210
rs13114461	4	103284697	t	c	0.0743	0.0765	0.0154	6.648e-07	+++-+++++--+++++-+-+--++-+++	0.7117	39618
rs116742388	2	24911514	a	g	0.7864	0.0463	0.0093	6.757e-07	++++-++-++-+++--+--+-?-+?+++	0.2489	38667.9
rs7342384	12	49692487	t	g	0.8105	-0.0482	0.0097	6.806e-07	------++--+--+-+-++-+-------	0.6338	39618
rs12475496	2	434668	a	g	0.3673	0.0402	0.0081	6.825e-07	+-+-+++++--+++++?++++++-+-++	0.08441	38160
rs6497396	16	19735697	t	c	0.8223	0.0513	0.0103	6.839e-07	++++++++++++--+?+?+-+?++?+++	0.6123	37743
rs7566675	2	522197	t	c	0.084	-0.0697	0.014	6.923e-07	----------+--+-?-?---?--?-+-	0.3662	37743
rs7760903	6	55209763	t	c	0.3792	0.0401	0.0081	7.042e-07	+-++-+++-++++++-?+-++?++?-++	0.4467	37209.9
rs28823960	12	49694457	a	t	0.8168	-0.0488	0.0098	7.106e-07	------++--+--+-+-++-+-------	0.7732	39618.1
rs2099598	2	25347046	t	c	0.7565	0.0454	0.0092	7.111e-07	++++++-++-++-+++++++-?++?+++	0.8031	38668.1
rs72769541	16	19777197	a	t	0.8246	0.0514	0.0104	7.117e-07	++++++++++++--+?+?+-+?++?+++	0.5281	37743
rs8087080	18	57791081	t	g	0.3162	0.0404	0.0082	7.12e-07	++++-++-++-+-++-++++-+++++++	0.3636	39618
rs62140846	2	24739350	c	g	0.7643	0.0441	0.0089	7.128e-07	++++-++--+-+++--+-++++-+++++	0.3942	39618.1
rs7572475	2	24893059	a	t	0.7659	0.0441	0.0089	7.161e-07	++++-++--+-+++--+-++-+-+++++	0.4128	39618
rs4898516	12	49699268	a	g	0.8126	-0.0481	0.0097	7.171e-07	------++--+--+-+-++-+-------	0.7653	39617.9
rs9961032	18	57788448	t	c	0.6856	-0.0405	0.0082	7.183e-07	-------+--+-+--+----+-------	0.3922	39618
rs7337284	13	54066314	t	c	0.271	0.0427	0.0086	7.187e-07	++++++-+-+++++--++++++-+++++	0.06358	39618
rs2083115	2	25347391	t	c	0.7542	0.0465	0.0094	7.31e-07	++++++-+++++-+++?+++-?++?+++	0.8714	37210
rs10734393	11	27557090	a	g	0.2732	0.0446	0.009	7.351e-07	+-++++--+++--+++?+-+-++++-++	0.01685	38159.9
rs62142286	2	24793703	a	g	0.7891	0.0462	0.0093	7.354e-07	++++-++--+-+++--+--+-?-+?+++	0.157	38668.1
rs13428821	2	25067876	t	c	0.9139	-0.0688	0.0139	7.356e-07	---+---+++---+-+------+-----	0.1283	39618
rs80122249	2	25011663	a	g	0.9186	-0.0687	0.0139	7.376e-07	---+---+-+-+-+-+------+-----	0.09277	39618
rs34303244	2	25348608	c	g	0.7104	0.044	0.0089	7.415e-07	++++++-+++++-+++?+++-+++-+++	0.7274	38160
rs58748031	2	516075	a	g	0.9165	0.0687	0.0139	7.447e-07	++++++++++-++-++++-+++++++-+	0.435	39618
rs626976	1	177899562	t	c	0.5611	0.0379	0.0077	7.495e-07	+-++++++-+-+-++?+?+++--+++--	0.3768	38693
rs11682031	2	24754442	a	g	0.7897	0.0462	0.0093	7.497e-07	++++-++--+-+++--+--+-?-+?+++	0.1584	38668
rs62142282	2	24780953	t	c	0.2102	-0.0462	0.0093	7.498e-07	----+--++-+---++-++-+?+-?---	0.1609	38668.1
rs11865189	16	19854259	a	t	0.7315	0.0431	0.0087	7.597e-07	+++-++++++++-+-?+?+++-++++++	0.4873	38693
rs11030382	11	28604477	t	c	0.3741	-0.039	0.0079	7.611e-07	------++----+---+-+--+--+-++	0.03347	39618
rs12577586	11	27600435	t	c	0.7684	-0.0449	0.0091	7.631e-07	-+----+-----+-+?-?+-+----+--	0.09126	38693
rs1599337	1	72846460	c	g	0.1807	-0.0494	0.01	7.652e-07	----+--+-------+--+--?-+?---	0.8784	38668
rs17790970	2	24735089	a	g	0.2103	-0.0461	0.0093	7.671e-07	----+--++-+---++-++-+?+-?---	0.1557	38667.9
rs62142276	2	24771048	t	c	0.2102	-0.0461	0.0093	7.679e-07	----+--++-+---++-++-+?+-?---	0.1536	38668
rs6545729	2	25014764	a	g	0.6356	0.0395	0.008	7.731e-07	+-++++-+++-+++--?+-+++++++++	0.6202	38160
rs10180231	2	25368030	t	c	0.7301	0.0433	0.0088	7.732e-07	++++-+-++-+--++++++++?++?+++	0.5005	38668
rs112670086	11	28644425	t	g	0.3562	-0.0405	0.0082	7.824e-07	------++-+--+---?-+--+--+-++	0.001302	38160
rs7928142	11	28668657	t	c	0.6456	0.0403	0.0082	7.887e-07	++++++--++++-+++?+-++-++-+--	0.002774	38160
rs4787493	16	30139900	t	g	0.6472	0.0404	0.0082	7.91e-07	+++-++-+++-++-++++++++++-+-+	0.6469	39618
rs13213670	6	55207304	a	c	0.3985	0.039	0.0079	7.924e-07	++++-+++-++++++-?+-+++++--++	0.8058	38160
rs10448285	9	129397014	t	c	0.352	0.0393	0.008	7.924e-07	++++++++++-++-+-+++++-++--++	0.8719	39618
rs7737449	5	91777343	t	c	0.6321	0.039	0.0079	7.944e-07	+++++++-++++-++-+-++++++++++	0.476	39618
rs11684913	2	24826852	a	c	0.7663	0.0439	0.0089	7.95e-07	++++-++--+-+++--+-++-+-+++++	0.367	39617.9
rs4732844	8	28104473	t	c	0.3727	-0.0385	0.0078	7.956e-07	---+++-----------+-------+--	0.8067	39618
rs72833479	17	45960449	a	g	0.2455	0.044	0.0089	7.957e-07	++++-+++++-+++++++++++++++++	0.9938	39618
rs7840565	8	28060783	a	g	0.5312	-0.0368	0.0075	8.071e-07	-+-+---+-+-------+-+--------	0.8182	39723
rs2635727	6	50820940	t	c	0.2582	-0.0421	0.0085	8.093e-07	----++------+---------------	0.6819	39722
rs66723169	18	57808978	a	c	0.2195	0.0477	0.0097	8.122e-07	+++--++-++-+--+?+?-+-??+?+++	0.1189	36110
rs4517468	11	27688286	a	t	0.3341	0.0397	0.0081	8.135e-07	+-+-++--++++++++--++++++++++	0.3422	39618.1
rs75503394	2	25155419	t	c	0.0887	0.0691	0.014	8.199e-07	+++-++++---+--+-++++++-+-+++	0.4448	39618
rs12735657	1	177809133	t	c	0.8091	-0.0473	0.0096	8.221e-07	-+-+---+----+------++-+--++-	0.2934	39618
rs1806822	2	25047632	t	c	0.0771	0.0713	0.0145	8.28e-07	+++-+++-+-+---+-+++++?-+?+++	0.2572	38668
rs35990565	8	28107815	t	c	0.3739	-0.0385	0.0078	8.316e-07	---+++-----------+-------+--	0.8075	39618
rs11647001	16	19771577	a	g	0.1685	-0.0506	0.0103	8.358e-07	-------+----++-?-?---+------	0.341	38693
rs114495854	2	25008196	c	g	0.9223	-0.0712	0.0145	8.48e-07	---+---+-+-+-+-+------+-----	0.05959	39618
rs11030108	11	27695464	a	g	0.3082	0.0394	0.008	8.504e-07	+-+-++--++++-+++-+++++++++++	0.4078	39725
rs11030393	11	28648737	a	g	0.6198	0.0377	0.0077	8.554e-07	++++++--++++-+++-+-++-++-+--	0.001416	39725
rs7136945	12	49697495	a	g	0.1887	0.0476	0.0097	8.629e-07	++++++--++-++-+-+--+-+++++++	0.752	39618
rs114518415	2	25007278	t	c	0.0777	0.0711	0.0145	8.744e-07	+++-+++-+-+-+-+-++++++-+++++	0.05928	39618
rs7128734	11	28603669	a	g	0.625	0.0388	0.0079	8.751e-07	++++++--++++-+++-+-++-++-+--	0.033	39618
rs10913445	1	177809560	c	g	0.191	0.0471	0.0096	8.849e-07	+-+-+++-++++-++++++--+-++--+	0.2959	39618
rs11684373	2	24699724	t	c	0.2045	-0.0473	0.0096	8.887e-07	----+--+--+---++-++-+?+-?---	0.1455	38668
rs10767646	11	27559744	t	c	0.2298	0.0449	0.0091	8.898e-07	+-+-++-+++++-+-?+?-+-++++-++	0.08832	38693
rs893771	2	24954778	a	g	0.2174	-0.0461	0.0094	8.906e-07	----+--+--+---++?++-+-+-----	0.3476	38160
rs4898519	12	49714103	a	g	0.8189	-0.0482	0.0098	8.994e-07	-------+--+-+----+--+-------	0.7161	39723
rs12085082	1	177802392	a	g	0.1911	0.0471	0.0096	9.049e-07	+-+-+++-++++-++++++-++-++--+	0.1771	39617.9
rs782218	1	72925397	c	g	0.1814	-0.0488	0.0099	9.08e-07	----+--+-+-----?-?+--+-+----	0.8056	38693.1
rs1320366	2	524173	c	g	0.9123	0.0686	0.014	9.109e-07	++++++++++-++-+?+?+++?++?+++	0.4506	37742.9
rs4760600	12	49314994	a	g	0.6123	0.0383	0.0078	9.165e-07	+++??--+++?+?+++++-+-+++-+++	0.6029	37612
rs17058753	8	28090914	t	c	0.6259	0.0382	0.0078	9.167e-07	+++---+++++++++++-++++++++++	0.8384	39618
rs7757498	6	55205679	a	g	0.6047	-0.0388	0.0079	9.183e-07	----+---+------+?-+--+--++--	0.826	38160
rs7701886	5	153547409	a	g	0.5513	-0.0377	0.0077	9.256e-07	----+--++-------+---+-----+-	0.8174	39618
rs6687024	1	72824860	t	c	0.6195	0.039	0.0079	9.294e-07	+++--++-++-++++?+?+-+++-+-++	0.3434	38693
rs10182036	2	25071835	a	g	0.0844	0.0685	0.014	9.366e-07	+++-+++---++--+-++++++-+++++	0.1482	39618
rs8044769	16	53839135	t	c	0.4862	-0.0375	0.0076	9.42e-07	----+++++---+-+???+----+---+	0.01607	37341
rs114907865	11	27690399	t	c	0.6616	-0.0394	0.008	9.608e-07	-+-+--++--------+-----------	0.4355	39617.9
rs10835368	11	28643299	t	c	0.3817	-0.0383	0.0078	9.637e-07	------++----+---+-+--+--+-++	0.001319	39618
rs62405419	6	50787459	t	g	0.1164	0.0604	0.0123	9.676e-07	++++-+-+++++--+++-+++?+-?+-+	0.1805	38667.9
rs71439149	2	25085200	a	g	0.0831	0.0696	0.0142	9.682e-07	+++-+++++--+--+-+++++?-+?+++	0.2453	38667.9
rs11215416	11	115077327	a	g	0.7496	0.0427	0.0087	9.734e-07	+++++-++++--+-++++++--++++++	0.1832	39618
rs3829849	9	129390800	t	c	0.3599	0.0381	0.0078	9.758e-07	++++++++++-+-++-++++++++--++	0.8098	39725
rs76078428	2	25044740	t	c	0.0787	0.0696	0.0142	9.759e-07	+++-+++-+-+---+-+++++?-+?+++	0.2878	38668
rs3748405	16	19870176	t	c	0.7317	0.0435	0.0089	9.771e-07	+++-++++++++-+-???+++-++++++	0.4316	37235
rs10495749	2	24730847	a	g	0.2329	-0.0436	0.0089	9.839e-07	----+--++-+---++-+----+-----	0.3436	39617.9
rs12735595	1	177793990	a	c	0.188	0.0471	0.0096	9.843e-07	+-+-+++-++++-++?+?+--+-++--+	0.1621	38798
rs7566416	2	25050977	t	c	0.3367	-0.0397	0.0081	9.901e-07	-+----+-+-+----+?-+---------	0.4045	38160
rs7342370	12	49694974	t	c	0.1835	0.0477	0.0097	9.933e-07	++++++--++-++-+-+--+-+++++++	0.5954	39618
rs3961049	2	442079	a	g	0.3665	0.0386	0.0079	9.977e-07	+-+--++++--++++++++++++-+-++	0.1209	39618
rs62496874	8	28091527	a	g	0.3732	-0.0381	0.0078	9.999e-07	---+++-----------+-------+--	0.8445	39617.9
rs62578127	9	129386860	t	c	0.3608	0.0385	0.0079	1.004e-06	++++++++++-+-++-+++++-++--++	0.823	39618
rs6497415	16	19876092	t	c	0.1825	-0.0501	0.0102	1.006e-06	---+---+-+--+--???---+--+---	0.7124	37235
rs934610	2	25047910	a	g	0.3366	-0.0396	0.0081	1.009e-06	-+----+-+-+----+?-+---------	0.4019	38160
rs77981750	2	25084918	t	c	0.0869	0.0679	0.0139	1.009e-06	+++-+++++--+--+-+++++?-+?+++	0.2749	38668
rs12730934	1	177817666	t	c	0.1824	0.0483	0.0099	1.018e-06	+++-+++-++++-++?+?+--+--+--+	0.05526	38693.1
rs4780822	16	19727998	a	g	0.8252	0.0501	0.0103	1.022e-06	+++++++-++++--+?+?+++-++-+++	0.317	38693
rs6484311	11	27531764	a	g	0.7823	-0.0465	0.0095	1.026e-06	-+-+--+-----+?+?-?--+----+--	0.09739	37118
rs80140483	2	24749597	a	t	0.233	-0.0435	0.0089	1.027e-06	----+-+++-+---++-+----+-----	0.3293	39617.9
rs1394186	16	19831476	a	g	0.7209	0.0431	0.0088	1.031e-06	+++-++++++++-++-?++++-++++++	0.5261	38160
rs7832318	8	28110414	a	g	0.6246	0.0383	0.0078	1.032e-06	+++---+++++++++++-+++++++-++	0.7722	39618
rs10987373	9	129379230	c	g	0.3647	0.0388	0.0079	1.034e-06	++++++++++-+--+-+++++?++?-++	0.8203	38668
rs13429256	2	512765	a	g	0.0863	-0.0675	0.0138	1.037e-06	----------+--+-?-?--------+-	0.5033	38693
rs62578126	9	129375338	t	c	0.3687	0.0384	0.0079	1.037e-06	++++++++++-+--+-++++++++--++	0.7955	39618
rs55822100	2	25012303	a	g	0.1468	0.0527	0.0108	1.039e-06	+-+-+++-+-+++--+++++++++++++	0.5596	39617.9
rs13416733	2	25056499	c	g	0.1475	0.0531	0.0109	1.059e-06	+-+-+++++-+++--++++++++++-++	0.5153	39618
rs144321338	2	24755363	t	g	0.7671	0.0434	0.0089	1.061e-06	++++-++--+-+++--+-++0+-+++++	0.3451	39617.9
rs75055234	2	24755948	t	c	0.2329	-0.0434	0.0089	1.062e-06	----+--++-+---++-+--0-+-----	0.3452	39617.9
rs6497409	16	19836346	c	g	0.2021	-0.0463	0.0095	1.065e-06	---+---+----+---------------	0.9727	39618
rs3963	6	55204017	t	c	0.396	0.0379	0.0078	1.067e-06	++++-+++-++++++-?+-+++++--++	0.7821	38266
rs79482748	2	25077978	a	c	0.9115	-0.0666	0.0136	1.069e-06	---+-----++-++-+------+-+---	0.3327	39618
rs4649955	1	72888654	t	c	0.1783	-0.048	0.0098	1.073e-06	----+--+-+-----+--+--+-+----	0.8604	39617.9
rs4923207	11	24757325	t	g	0.8052	0.0485	0.0099	1.074e-06	+-++++++++-+--+-?+++++++-+++	0.7589	38266
rs13404336	2	25384961	t	c	0.7518	0.0443	0.0091	1.086e-06	++++++-++-+--++++++++?++?+++	0.6207	38667.9
rs75697605	2	24766476	a	g	0.233	-0.0434	0.0089	1.092e-06	----+--++-+---++-+--0-+-----	0.345	39617.9
rs35926073	11	28644440	t	c	0.3611	-0.0398	0.0082	1.095e-06	------++-+--+---?-+--+--+-++	0.0009083	38160
rs2488376	13	54074415	t	c	0.2704	0.0413	0.0085	1.102e-06	++++++-+-+++++--++++++-+++++	0.03205	39715
rs1336783	1	177922471	a	c	0.2871	0.041	0.0084	1.106e-06	+++-++++++-+-++++-++-+--++-+	0.133	39618
rs9695734	9	96407983	t	c	0.1603	-0.0517	0.0106	1.115e-06	---??-+--+?-?-+---------+--+	0.5229	37506
rs12377624	9	129373110	c	g	0.3643	0.0383	0.0079	1.117e-06	++++++++++-+--+-+++++-++--++	0.8215	39618
rs190486227	12	50272606	t	c	0.8599	-0.0736	0.0151	1.122e-06	----+--+-?+-?-?-?++---+-+-+-	0.03885	35017.9
rs57357594	2	24757590	a	t	0.7683	0.0435	0.0089	1.126e-06	++++-++--+-+++--+-++++-+++++	0.3434	39618
rs8062735	16	19839538	t	c	0.2017	-0.0462	0.0095	1.136e-06	---+---+----+---------------	0.973	39618
rs62142278	2	24776522	t	g	0.233	-0.0433	0.0089	1.148e-06	----+--++-+---++-+--0-+-----	0.3473	39617.9
rs71480157	11	27610041	t	c	0.8229	0.0494	0.0102	1.149e-06	++++++++-+-+--++?++-++++++++	0.3858	38160
rs34133016	8	42718597	a	t	0.0406	-0.1016	0.0209	1.15e-06	-+------------++-+------+-+-	0.891	39618
rs34046390	8	42712654	c	g	0.9603	0.1018	0.0209	1.156e-06	+-++++++++++++--+-++++++-+-+	0.8993	39618
rs77777078	2	25078165	t	c	0.9161	-0.0689	0.0142	1.16e-06	---+-----++-++-+-----?+-?---	0.2194	38668
rs11608916	12	49303083	a	c	0.3796	-0.0379	0.0078	1.16e-06	----+++-----------+-----+---	0.3969	39618
rs1599339	1	72846190	a	g	0.1809	-0.0481	0.0099	1.167e-06	----+--+-+--------+--+-+----	0.8944	39618
rs10760442	9	129383900	a	g	0.3605	0.0383	0.0079	1.17e-06	++++++++++-+-++-+++++-++--++	0.8316	39618
rs11865403	16	19824493	c	g	0.1656	-0.0513	0.0106	1.172e-06	-------+----++-???-+-+------	0.1725	37234.9
rs113516984	17	45964442	t	c	0.7565	-0.0433	0.0089	1.18e-06	----+-----+-----------------	0.9915	39618.1
rs11030392	11	28648671	a	g	0.3808	-0.0377	0.0078	1.184e-06	------++----+---+-+--+--+-++	0.001393	39618
rs782240	1	72906385	a	g	0.1797	-0.0478	0.0098	1.188e-06	----+--+-+-----+--+--+-+----	0.8681	39618
rs7206184	16	19739002	c	g	0.8331	0.05	0.0103	1.19e-06	+++++++-++++--+?+?+++-++-+++	0.2806	38692.9
rs2902200	1	177806838	a	g	0.8114	-0.0467	0.0096	1.191e-06	-+-+---+----+--?-?-++-+--++-	0.1603	38798
rs10835378	11	28644716	a	g	0.6223	0.038	0.0078	1.194e-06	++++++--+-++-+++-+-++-++-+--	0.001394	39618
rs10835379	11	28644719	a	g	0.3777	-0.038	0.0078	1.194e-06	------++-+--+---+-+--+--+-++	0.001395	39618
rs10835380	11	28644729	a	g	0.6223	0.038	0.0078	1.195e-06	++++++--+-++-+++-+-++-++-+--	0.001394	39618
rs1373914	1	72901515	t	c	0.1797	-0.0477	0.0098	1.198e-06	----+--+-+-----+--+--+-+----	0.8678	39618
rs992956	1	72901141	t	g	0.8198	0.0482	0.0099	1.202e-06	++++-++-+-+++++?+?-++-+-++++	0.8086	38693
rs74580656	2	25451789	t	c	0.2238	0.0493	0.0102	1.209e-06	++-+++++++-+--+-?++++?++?+++	0.2705	37210
rs782257	1	72899059	a	g	0.1802	-0.0482	0.0099	1.211e-06	----+--+-+-----?-?+--+-+----	0.8084	38693
rs76259681	2	25082109	a	g	0.0866	0.0674	0.0139	1.212e-06	+++-+++++--+--+-+++++?-+?+++	0.2433	38668
rs6545884	2	25243469	a	t	0.7514	-0.0489	0.0101	1.227e-06	---------+--+---?-+--++--+--	0.5089	38160
rs112956320	2	442420	t	c	0.2897	0.0454	0.0094	1.233e-06	+-+--++++--+?+++?+-++++--+++	0.02635	37104
rs113187178	17	46117471	a	g	0.2198	0.0444	0.0092	1.233e-06	++++-+-+++-++++-++++++-++-++	0.8441	39618
rs78372398	2	25099494	a	g	0.1075	-0.0679	0.014	1.236e-06	------++--+----+?-+--?--?---	0.878	37210.1
rs11866391	16	19846324	t	c	0.7995	0.0466	0.0096	1.246e-06	+++-+++-++++-+++++++++++++++	0.9861	39618.1
rs1893512	18	57787559	t	c	0.6808	-0.0394	0.0081	1.251e-06	----+--+--+-+--?-?--+-------	0.6609	38800
rs2797104	1	72891435	a	g	0.1797	-0.0477	0.0098	1.251e-06	----+--+-+-----+--+--+-+----	0.8664	39618.1
rs4290215	11	28647955	t	g	0.3808	-0.0377	0.0078	1.253e-06	------++----+---+-+--+--+-++	0.001331	39617.9
rs6459074	6	55207392	a	g	0.6032	-0.0383	0.0079	1.26e-06	----+---+------+?-+-----++--	0.7944	38160.1
rs7559082	2	24873730	a	g	0.7661	0.0434	0.009	1.261e-06	++++-+---+-+++--+-++-+-+++++	0.4782	39617.9
rs4434991	11	28647156	a	t	0.6192	0.0377	0.0078	1.261e-06	++++++--++++-+++-+-++-++-+--	0.00133	39618
rs17175713	18	57909799	t	c	0.7494	-0.0453	0.0093	1.267e-06	-------+--+-++-???+-+??-?---	0.443	34652
rs73920612	2	25147289	a	g	0.7991	-0.0471	0.0097	1.267e-06	-------+----++--?---+-+-+---	0.06833	38160
rs4351802	11	28646611	a	t	0.3808	-0.0377	0.0078	1.267e-06	------++----+---+-+--+--+-++	0.001328	39618
rs4582964	11	28646575	a	t	0.3808	-0.0377	0.0078	1.268e-06	------++----+---+-+--+--+-++	0.001328	39618
rs61196936	2	24830463	a	g	0.7637	0.0436	0.009	1.269e-06	++++-+---+-+++--+-++-+-+++++	0.2573	39618
rs9382487	6	55203369	c	g	0.6026	-0.0381	0.0079	1.276e-06	----+---+------+?-+-----++--	0.7811	38160
rs11209963	1	72883303	a	g	0.1802	-0.0481	0.0099	1.276e-06	----+--+-+-----?-?+--+-+----	0.805	38692.9
rs4576808	11	28646472	t	c	0.3802	-0.0377	0.0078	1.277e-06	------++----+---+-+--+--+-++	0.00135	39618
rs782214	1	72945128	a	g	0.8204	0.0477	0.0098	1.278e-06	++++-++-+-+++++-++-++-+-++++	0.8643	39618
rs10767737	11	28645819	t	g	0.6192	0.0377	0.0078	1.281e-06	++++++--++++-+++-+-++-++-+--	0.001325	39618
rs11168962	12	49672739	a	t	0.7217	-0.0438	0.0091	1.284e-06	----+-++--+--+--?-+-+-+-----	0.664	38159.9
rs2492971	1	72887188	t	c	0.1797	-0.0476	0.0098	1.291e-06	----+--+-+-----+--+--+-+----	0.8638	39618
rs8055485	16	19750051	a	g	0.8332	0.0498	0.0103	1.295e-06	+++++++-++++--+?+?+++-++-+++	0.2778	38693
rs4268495	11	28645341	c	g	0.3802	-0.0377	0.0078	1.297e-06	------++----+---+-+--+--+-++	0.001345	39618
rs2590942	1	72885281	t	g	0.8203	0.0476	0.0098	1.3e-06	++++-++-+-+++++-++-++-+-++++	0.865	39617.9
rs2940288	4	130918048	t	g	0.3584	0.0382	0.0079	1.303e-06	+-++-+--+-++++++?-+--+++-+-+	0.1542	38266
rs4782278	16	19758962	t	c	0.1668	-0.0498	0.0103	1.304e-06	-------+----++-?-?---+------	0.2752	38693
rs12064340	1	177814388	t	c	0.1929	0.0462	0.0095	1.309e-06	+-+-+++-++++-++++++--+-++--+	0.2093	39618
rs4782272	16	19729016	c	g	0.1687	-0.0506	0.0105	1.31e-06	-------+----++-???---+--+---	0.2141	37235.1
rs74410950	2	25076168	c	g	0.0859	0.0677	0.014	1.319e-06	+++-+++++--+--+-+++++?-+?+++	0.23	38668
rs9951795	18	57777991	c	g	0.6791	-0.0398	0.0082	1.325e-06	----+--+--+-+--?-?--+-------	0.6037	38693
rs61771778	1	72926855	a	g	0.8215	0.0487	0.0101	1.332e-06	++++-++-+-+++++?+?-++?+-?+++	0.7584	37743
rs4780825	16	19745801	a	g	0.8453	0.0537	0.0111	1.334e-06	+++++++-++++?-+-?-+-+-++++++	0.1553	37104
rs12473543	2	25387181	t	g	0.751	0.0439	0.0091	1.337e-06	++++-+-++-+--++++++++?++?+++	0.6502	38668
rs2118404	2	25377329	t	c	0.2699	-0.0419	0.0087	1.338e-06	----+-+--+-++---------------	0.6465	39618
rs4274191	11	28645698	a	g	0.3807	-0.0376	0.0078	1.34e-06	------++----+---+-+--+--+-++	0.001345	39618
rs55687948	16	19747922	t	c	0.8332	0.0498	0.0103	1.342e-06	+++++++-++++--+?+?+++-++-+++	0.2805	38693
rs782242	1	72916574	t	c	0.1802	-0.048	0.0099	1.356e-06	----+--+-+-----?-?+--+-+----	0.8079	38693.1
rs62142303	2	24833314	c	g	0.7713	0.0436	0.009	1.36e-06	++++-+--++-+++--+-++++-+++++	0.4072	39618
rs8044413	16	19719840	t	c	0.1195	-0.0602	0.0125	1.363e-06	---+---+----+-??-?-+-?--?+--	0.9115	35976
rs11030051	11	27589011	a	g	0.1233	0.0567	0.0117	1.363e-06	+-+-++-++++--++--+-+-++++-++	0.05166	39617.9
rs6885976	5	91757742	t	c	0.6322	0.0385	0.008	1.364e-06	++++--+-++++-++-+-+++?++?+++	0.4003	38668
rs28663160	16	19846937	t	c	0.8004	0.0463	0.0096	1.364e-06	+++-+++-++++-+++++++++++++++	0.9792	39618
rs17738465	2	25107704	t	c	0.9159	-0.0665	0.0138	1.371e-06	---+-----++-++-+-----?+-?---	0.2365	38775
rs10835370	11	28643326	a	c	0.38	-0.0377	0.0078	1.374e-06	------++----+---+-+--+--+-++	0.001029	39618
rs12926086	16	19858822	t	c	0.7332	0.0424	0.0088	1.375e-06	+++-++++++++-+--?++++-++++++	0.4931	38160.1
rs782211	1	72946328	a	g	0.1796	-0.0475	0.0098	1.377e-06	----+--+-+-----+--+--+-+----	0.86	39618
[truncated: 684 more rows]

## Sheet: Sheet1
rs939584	2	621558	t	c	0.8316	0.1066	0.0102	8.852e-26	++++++++++++++++++++-?++?+++	0.2505	38668
rs6752470	2	629694	a	t	0.8335	0.1065	0.0102	1.67e-25	++++++++++++++++++++-?++?+++	0.2593	38668
rs62105304	2	632925	a	g	0.1684	-0.1061	0.0102	2.361e-25	--------------------+?--?---	0.2386	38668
rs7579971	2	631603	t	c	0.8338	0.1062	0.0102	2.48e-25	++++++++++++++++++++-?++?+++	0.2769	38668
rs4854344	2	638144	t	g	0.8331	0.1042	0.0101	3.793e-25	+-++++++++++++++++++-?++?+++	0.2428	38769
rs10166979	2	640701	a	g	0.167	-0.1055	0.0102	3.936e-25	-+------------------+?--?---	0.2144	38668
rs73139123	2	630075	t	c	0.8308	0.1053	0.0102	4.176e-25	++++++++++++++++++++-?++?+++	0.3808	38668.1
rs6711012	2	624034	c	g	0.8324	0.1038	0.0101	5.23e-25	++++++++++++++++++++--++++++	0.1828	39618
rs6711039	2	624084	a	g	0.8324	0.1038	0.0101	5.245e-25	++++++++++++++++++++--++++++	0.1827	39618
rs939582	2	622723	a	g	0.1677	-0.1038	0.01	5.3e-25	--------------------++------	0.1786	39618
rs1320330	2	622225	t	g	0.1677	-0.1038	0.0101	5.427e-25	--------------------++------	0.1788	39618
rs5017301	2	631096	a	g	0.8285	0.1038	0.0101	5.47e-25	+-++++0+++++++++++++--++++++	0.1882	39618
rs6717005	2	621910	a	c	0.1677	-0.1038	0.0101	5.571e-25	--------------------++------	0.1801	39618
rs1320332	2	621954	t	c	0.1677	-0.1037	0.0101	5.759e-25	--------------------++------	0.1787	39618
rs6711254	2	624210	a	g	0.8326	0.1037	0.0101	6.44e-25	++++++++++++++++++++--++++++	0.1801	39618
rs13387939	2	637498	a	c	0.8331	0.1038	0.0101	7.11e-25	++++++++++++++++++++--++++++	0.2341	39618
rs6735049	2	630569	t	c	0.1673	-0.1038	0.0101	7.225e-25	--------------------++------	0.2387	39617.9
rs6725686	2	630436	a	c	0.8329	0.1037	0.0101	7.53e-25	++++++++++++++++++++--++++++	0.236	39618
rs12997450	2	630113	t	c	0.8328	0.1037	0.0101	7.694e-25	++++++++++++++++++++--++++++	0.2323	39618
rs13007086	2	630034	a	t	0.1672	-0.1037	0.0101	7.726e-25	--------------------++------	0.2309	39618
rs6751993	2	635864	a	g	0.1677	-0.1036	0.0101	8.447e-25	--------------------++------	0.2586	39618
rs12995480	2	629881	t	c	0.1674	-0.1036	0.0101	8.975e-25	--------------------++------	0.2176	39618
rs6732471	2	629914	a	g	0.8328	0.1035	0.0101	9.008e-25	++++++++++++++++++++--++++++	0.2294	39618
rs12995666	2	629959	t	c	0.1672	-0.1035	0.0101	9.104e-25	--------------------++------	0.2308	39618
rs12463617	2	629244	a	c	0.1685	-0.1036	0.0101	9.284e-25	-+------------------++------	0.186	39618
rs2867115	2	651382	t	c	0.8351	0.1051	0.0102	9.556e-25	+-++++++++++++++++++--++++++	0.1779	39618
rs13386964	2	650828	a	g	0.1679	-0.1033	0.0101	9.794e-25	-+------------------++------	0.1848	39618
rs4854346	2	638918	a	c	0.1669	-0.1033	0.0101	1.019e-24	--------------------++------	0.2359	39618.1
rs7569210	2	631462	a	g	0.833	0.1035	0.0101	1.049e-24	++++++++++++++++++++--++++++	0.2449	39618
rs10865548	2	631606	a	g	0.167	-0.1035	0.0101	1.053e-24	--------------------++------	0.2455	39618
rs7569102	2	631335	t	g	0.833	0.1035	0.0101	1.056e-24	++++++++++++++++++++--++++++	0.2441	39618
rs7588007	2	631255	t	c	0.167	-0.1035	0.0101	1.056e-24	--------------------++------	0.2438	39618
rs7561556	2	638560	t	c	0.1671	-0.1032	0.0101	1.129e-24	--------------------++------	0.2417	39618
rs2867125	2	622827	t	c	0.1672	-0.1065	0.0104	1.241e-24	-?-??-----?-?-------+?--?---	0.2758	36118
rs1320337	2	649867	a	t	0.8319	0.1031	0.0101	1.277e-24	+-++++++++++++++++++--++++++	0.1828	39617.9
rs12623218	2	632146	a	t	0.8328	0.1032	0.0101	1.401e-24	++++++++++++++++++++--++++++	0.2609	39618
rs12993295	2	632808	t	g	0.8328	0.1032	0.0101	1.474e-24	++++++++++++++++++++--++++++	0.2357	39618
rs66906321	2	630070	t	c	0.1773	-0.1025	0.01	1.507e-24	--------------------++------	0.3043	39617.9
rs34119520	2	632760	t	c	0.1671	-0.1032	0.0101	1.568e-24	--------------------++------	0.2349	39618
rs7606023	2	638566	c	g	0.1666	-0.1029	0.0101	1.592e-24	--------------------++------	0.2314	39618
rs7564708	2	639055	t	c	0.1674	-0.1028	0.0101	1.668e-24	--------------------++------	0.2174	39618
rs7558910	2	645122	c	g	0.1679	-0.1028	0.0101	1.695e-24	-+------------------++------	0.1809	39617.9
rs4854347	2	641159	a	c	0.1678	-0.1028	0.0101	1.724e-24	-+------------------++------	0.1884	39618
rs7571967	2	646839	t	g	0.1716	-0.1023	0.01	1.758e-24	-+------------------++------	0.2168	39618
rs7579427	2	631183	a	c	0.8323	0.1029	0.0101	1.851e-24	++++++++++++++++++++--++++++	0.2563	39618
rs7601028	2	642499	c	g	0.1678	-0.1027	0.0101	1.87e-24	-+------------------++------	0.1823	39618
rs13012571	2	632550	t	c	0.8303	0.1028	0.0101	1.872e-24	++++++++++++++++++++--++++++	0.314	39618
rs7608050	2	652247	a	g	0.1682	-0.1031	0.0101	1.953e-24	-+------------------++------	0.1719	39618
rs6760274	2	652272	a	g	0.1665	-0.1032	0.0101	2.043e-24	--------------------++------	0.2103	39618
rs13022164	2	632536	a	g	0.1688	-0.1024	0.0101	2.836e-24	--------------------++------	0.3142	39618
rs13386517	2	650479	c	g	0.1673	-0.1046	0.0103	3.043e-24	-+-------------?-?--+?--?---	0.1987	37742.9
rs7604609	2	643303	c	g	0.1667	-0.1024	0.0101	3.657e-24	-+------------------++------	0.1858	39618
rs7591067	2	642846	a	g	0.8327	0.1042	0.0103	4.36e-24	+-+++++++++++++?+?++-?++?+++	0.1919	37743
rs4854348	2	647760	a	g	0.1707	-0.1017	0.0101	4.582e-24	-+------------------++------	0.1444	39618
rs10865551	2	641863	a	t	0.8327	0.104	0.0103	5.573e-24	+-+++++++++++++?+?++-?++?+++	0.1959	37743
rs35796073	2	636819	a	c	0.167	-0.1026	0.0102	7.998e-24	---------------?-?--++------	0.205	38693
rs62105303	2	632922	a	g	0.8286	0.1034	0.0103	1.083e-23	+++++++++++++++?+?++-?++?+++	0.2544	37743
rs6751994	2	635866	a	g	0.1671	-0.1021	0.0102	1.249e-23	---------------?-?--++------	0.2495	38692.9
rs7560246	2	643469	t	c	0.1666	-0.1019	0.0102	1.328e-23	-+---------------?--++------	0.1571	39067.1
rs12714414	2	651407	t	c	0.8342	0.1031	0.0103	1.392e-23	+-+++++++++++++?+?++--++++++	0.1499	38692.9
rs7570198	2	648198	t	c	0.8273	0.1002	0.01	1.414e-23	+-++++++++++++++++++--++++++	0.2046	39618
rs13391851	2	642467	a	g	0.1668	-0.1015	0.0102	1.948e-23	---------------?-?--++------	0.211	38692.9
rs7571957	2	646803	t	c	0.1678	-0.1014	0.0102	1.991e-23	-+-------------?-?--++------	0.179	38693.1
rs62105327	2	639060	a	t	0.8247	0.0996	0.01	2.074e-23	++++++++++++++++++++--++++++	0.239	39617.9
rs13388043	2	637597	t	c	0.8322	0.1015	0.0102	2.076e-23	+++++++++++++++?+?++--++++++	0.2474	38693
rs10189761	2	646364	a	t	0.8319	0.1013	0.0102	2.185e-23	+-+++++++++++++?+?++--++++++	0.1687	38692.9
rs10172769	2	646345	a	g	0.8319	0.1013	0.0102	2.187e-23	+-+++++++++++++?+?++--++++++	0.1687	38692.9
rs13387091	2	650980	a	g	0.1668	-0.1016	0.0102	2.237e-23	---------------?-?--++------	0.1868	38693
rs11127487	2	639900	t	c	0.832	0.1013	0.0102	2.337e-23	+-+++++++++++++?+?++--++++++	0.1732	38693
rs10169736	2	641082	a	t	0.168	-0.1013	0.0102	2.348e-23	-+-------------?-?--++------	0.1735	38693
rs7561317	2	644953	a	g	0.169	-0.1031	0.0104	2.542e-23	-?-??-------?--?-?--++------	0.1878	36303
rs4429506	2	652576	a	c	0.8273	0.0999	0.0101	3.477e-23	+-++++++++++++++++++--++++++	0.2031	39618.1
rs4854342	2	634476	c	g	0.8144	0.0987	0.01	3.505e-23	++++++++++++++++++++--++++++	0.4913	39618
rs10192350	2	652607	t	c	0.8321	0.1014	0.0102	4.09e-23	+-+++++++++++++?+?++--++++++	0.175	38693
rs2860323	2	614210	a	g	0.1679	-0.0999	0.0101	4.35e-23	------------+--------+------	0.2612	39618
rs4854343	2	638107	a	g	0.8326	0.1005	0.0102	4.648e-23	+++++++++++++++?+?++--++++++	0.1915	38692.9
rs7574359	2	652542	t	c	0.832	0.1013	0.0102	4.788e-23	+-+++++++++++++?+?++--++++++	0.1662	38693
rs2947411	2	614168	a	g	0.173	-0.1025	0.0104	4.977e-23	-?-??-----?-?-------++------	0.2564	36963
rs939581	2	623224	t	c	0.8324	0.1021	0.0104	8.395e-23	++++++++++++++++++++-??+?+++	0.4499	37035.1
rs4854340	2	623216	a	g	0.8324	0.1021	0.0104	8.473e-23	++++++++++++++++++++-??+?+++	0.4503	37035.1
rs11127484	2	623798	t	c	0.1668	-0.102	0.0104	9.257e-23	--------------------+??-?---	0.4838	37035
rs13028252	2	632529	t	c	0.17	-0.0999	0.0102	9.358e-23	---------------?-?--++------	0.3137	38693.1
rs4854339	2	623212	t	c	0.1677	-0.1019	0.0104	9.863e-23	--------------------+??-?---	0.4418	37035
rs13396935	2	653195	a	g	0.1678	-0.1008	0.0103	1.021e-22	-+-------------?-?--++------	0.1977	38693
rs6756518	2	651483	a	g	0.1583	-0.1047	0.0107	1.054e-22	-+----+--------?-?-+++------	0.09904	38693
rs7576635	2	625057	t	c	0.8335	0.102	0.0104	1.068e-22	++++++++++++++++++++-??+?+++	0.4556	37035
rs6719883	2	651482	t	g	0.8417	0.1047	0.0107	1.09e-22	+-++++-++++++++?+?+---++++++	0.09887	38693
rs7576624	2	625029	t	c	0.8335	0.1019	0.0104	1.094e-22	++++++++++++++++++++-??+?+++	0.4562	37035
rs11127483	2	623691	a	g	0.8335	0.1019	0.0104	1.097e-22	++++++++++++++++++++-??+?+++	0.4605	37035
rs11687052	2	623740	a	g	0.1665	-0.1018	0.0104	1.145e-22	--------------------+??-?---	0.4621	37035
rs2867122	2	624581	a	c	0.1666	-0.1018	0.0104	1.234e-22	--------------------+??-?---	0.4657	37035
rs6760543	2	622388	c	g	0.8335	0.1017	0.0104	1.235e-22	++++++++++++++++++++-??+?+++	0.4569	37035
rs6728726	2	623976	t	c	0.1665	-0.1018	0.0104	1.236e-22	--------------------+??-?---	0.4646	37035
rs6548237	2	621461	a	c	0.1661	-0.1022	0.0104	1.246e-22	--------------------+??-?---	0.4862	37035.1
rs1320331	2	622161	c	g	0.8335	0.1017	0.0104	1.26e-22	++++++++++++++++++++-??+?+++	0.4583	37035
rs939583	2	622531	t	c	0.8337	0.1017	0.0104	1.337e-22	++++++++++++++++++++-??+?+++	0.4615	37035
rs2867124	2	622857	a	g	0.1666	-0.1014	0.0104	1.608e-22	--------------------+??-?---	0.4306	37035
rs6744646	2	628504	a	g	0.1679	-0.1014	0.0104	1.988e-22	--------------------+??-?---	0.4359	37035
rs6743060	2	629510	a	c	0.8339	0.1015	0.0104	2.02e-22	++++++++++++++++++++-??+?+++	0.4887	37034.9
rs6748821	2	629601	a	g	0.1661	-0.1015	0.0104	2.109e-22	--------------------+??-?---	0.4883	37034.9
rs6731688	2	630662	a	c	0.1659	-0.1015	0.0104	2.155e-22	--------------------+??-?---	0.5048	37034.9
rs6731225	2	630224	a	t	0.1666	-0.1014	0.0104	2.192e-22	--------------------+??-?---	0.4792	37035
rs6725549	2	630323	a	c	0.834	0.1014	0.0104	2.294e-22	++++++++++++++++++++-??+?+++	0.4946	37035
rs6755502	2	635721	t	c	0.1659	-0.1014	0.0104	2.306e-22	--------------------+??-?---	0.5523	37035.1
rs6752706	2	629831	t	c	0.1684	-0.101	0.0104	2.385e-22	--------------------+??-?---	0.4237	37034.9
rs13007080	2	630024	a	c	0.166	-0.1013	0.0104	2.494e-22	--------------------+??-?---	0.4783	37035
rs6739303	2	628749	t	c	0.8306	0.1011	0.0104	2.544e-22	++++++++++++++++++++-??+?+++	0.4298	37035.1
rs5017300	2	631099	c	g	0.1701	-0.1011	0.0104	2.558e-22	-+----0-------------+??-?---	0.4208	37035
rs6735024	2	630509	t	c	0.1673	-0.1012	0.0104	2.676e-22	--------------------+??-?---	0.4791	37035
rs7564711	2	639061	t	g	0.1757	-0.0981	0.0101	2.705e-22	---------------?-?--++------	0.227	38692.9
rs7570232	2	621185	t	c	0.1671	-0.101	0.0104	2.878e-22	--------------------+??-?---	0.5234	37034.9
rs2867110	2	651105	c	g	0.1667	-0.101	0.0104	3.218e-22	-+------------------+??-?---	0.4472	37034.9
rs6731348	2	630339	a	c	0.1673	-0.101	0.0104	3.272e-22	-+------------------+??-?---	0.4443	37035
rs6749375	2	636017	t	c	0.8343	0.1011	0.0104	3.371e-22	++++++++++++++++++++-??+?+++	0.5411	37034.9
rs7585056	2	631528	a	g	0.1657	-0.1012	0.0104	3.378e-22	--------------------+??-?---	0.515	37035.1
rs11127485	2	632028	t	c	0.8342	0.101	0.0104	3.58e-22	++++++++++++++++++++-??+?+++	0.5088	37035
rs1320336	2	650012	a	g	0.1667	-0.1008	0.0104	3.716e-22	-+------------------+??-?---	0.4607	37034.9
rs13021737	2	632348	a	g	0.166	-0.1009	0.0104	4.269e-22	--------------------+??-?---	0.5429	37035.1
rs13027828	2	632379	t	g	0.166	-0.1009	0.0104	4.273e-22	--------------------+??-?---	0.5382	37035
rs35802221	2	632904	a	g	0.1678	-0.1007	0.0104	4.475e-22	--------------------+??-?---	0.4579	37035
rs6734363	2	635200	a	g	0.8343	0.1008	0.0104	4.7e-22	++++++++++++++++++++-??+?+++	0.5299	37035
rs2867114	2	651380	t	c	0.1634	-0.1023	0.0106	5.142e-22	-+------------------+??-?---	0.3802	37034.9
rs7567710	2	645372	t	g	0.1667	-0.1003	0.0104	5.834e-22	-+------------------+??-?---	0.4592	37034.9
rs7559018	2	645203	t	c	0.8333	0.1003	0.0104	5.863e-22	+-++++++++++++++++++-??+?+++	0.459	37034.9
rs5017303	2	630995	t	g	0.17	-0.1003	0.0104	5.931e-22	-+------------------+??-?---	0.4258	37035
rs2867105	2	601905	t	g	0.1729	-0.0949	0.0099	6.641e-22	-+------------------++------	0.4533	39725
rs13022337	2	632609	a	g	0.1672	-0.1004	0.0105	9.111e-22	--------------------+??-?---	0.5242	37035.1
rs10193244	2	647580	t	c	0.1696	-0.0995	0.0104	1.143e-21	-+------------------+??-?---	0.3587	37035
rs4854349	2	647861	t	c	0.1696	-0.0994	0.0104	1.239e-21	-+------------------+??-?---	0.382	37035
rs13412194	2	653245	a	c	0.8338	0.1006	0.0105	1.297e-21	+-++++++++++++++++++-??+?+++	0.5189	37035
rs7560127	2	643315	t	c	0.1653	-0.0998	0.0105	1.374e-21	-+------------------+??-?---	0.4739	37035
rs2867123	2	624524	c	g	0.8333	0.1002	0.0105	1.486e-21	+++++++++++++++?+?++-??+?+++	0.4626	36110
rs12476198	2	625347	t	c	0.1664	-0.1002	0.0105	1.622e-21	---------------?-?--+??-?---	0.4476	36110
rs6719518	2	623935	t	c	0.8334	0.1001	0.0105	1.71e-21	+++++++++++++++?+?++-??+?+++	0.4542	36110
rs2903492	2	624678	a	g	0.8333	0.1	0.0105	1.853e-21	+++++++++++++++?+?++-??+?+++	0.4486	36110
rs13397165	2	653354	a	g	0.1663	-0.1002	0.0105	1.867e-21	-+------------------+??-?---	0.5249	37035
rs2867112	2	651349	t	g	0.8354	0.1012	0.0107	2.113e-21	+-+++++++++++++?+?++-??+?+++	0.3947	36110
rs13412197	2	653250	a	g	0.8334	0.0999	0.0105	2.2e-21	+-++++++++++++++++++-??+?+++	0.5038	37035
rs2867113	2	651365	a	g	0.1639	-0.1015	0.0107	2.3e-21	-+-------------?-?--+??-?---	0.4124	36110
rs12714415	2	651430	t	c	0.8353	0.1014	0.0107	2.318e-21	+-+++++++++++++?+?++-??+?+++	0.4168	36109.9
rs11676272	2	25141538	a	g	0.5368	-0.075	0.0079	2.373e-21	---??--++---?--------?--?---	0.5425	36714
rs10188334	2	653874	t	c	0.1661	-0.1001	0.0106	2.7e-21	-+------------------+??-?---	0.531	37034.9
rs35142762	2	636790	t	c	0.8342	0.1	0.0106	2.788e-21	+++++++++++++++?+?++-??+?+++	0.4827	36109.9
rs6744653	2	628524	a	g	0.1682	-0.0996	0.0105	2.94e-21	---------------?-?--+??-?---	0.4163	36110
rs7567570	2	615140	t	c	0.167	-0.0984	0.0104	3.268e-21	---------------------??-?---	0.5717	37035
rs13396119	2	637508	t	c	0.1658	-0.0998	0.0106	3.308e-21	---------------?-?--+??-?---	0.5081	36110
rs7559547	2	615627	t	c	0.8291	0.098	0.0104	3.391e-21	+-++++++++++++++++++-??+?+++	0.4701	37035
rs6746275	2	635857	a	c	0.8342	0.0996	0.0106	3.98e-21	+++++++++++++++?+?++-??+?+++	0.5385	36109.9
rs2903490	2	651290	a	g	0.8334	0.0995	0.0105	4.014e-21	+-+++++++++++++?+?++-??+?+++	0.4216	36109.9
rs2867111	2	651286	a	c	0.8334	0.0995	0.0105	4.022e-21	+-+++++++++++++?+?++-??+?+++	0.4217	36109.9
rs2867109	2	651030	t	g	0.8331	0.0993	0.0105	4.203e-21	+-+++++++++++++?+?++-??+?+++	0.4337	36110
rs10865549	2	631759	a	g	0.834	0.0995	0.0106	4.255e-21	+++++++++++++++?+?++-??+?+++	0.5045	36110
rs11127486	2	632101	t	c	0.834	0.0995	0.0106	4.268e-21	+++++++++++++++?+?++-??+?+++	0.5054	36110
rs4613321	2	650647	a	g	0.8331	0.0991	0.0105	4.799e-21	+-+++++++++++++?+?++-??+?+++	0.4498	36110
rs13386627	2	650560	c	g	0.1669	-0.0991	0.0105	4.81e-21	-+-------------?-?--+??-?---	0.4498	36109.9
rs13401686	2	650519	a	g	0.8331	0.0991	0.0105	4.839e-21	+-+++++++++++++?+?++-??+?+++	0.4498	36109.9
rs2867108	2	650143	t	c	0.8331	0.0991	0.0105	4.897e-21	+-+++++++++++++?+?++-??+?+++	0.4499	36109.9
rs1320338	2	649347	t	g	0.8331	0.0991	0.0105	5.046e-21	+-+++++++++++++?+?++-??+?+++	0.45	36110
rs4452188	2	648810	a	g	0.8331	0.0991	0.0105	5.154e-21	+-+++++++++++++?+?++-??+?+++	0.45	36109.9
rs12992154	2	632300	t	g	0.8338	0.0992	0.0106	5.648e-21	+++++++++++++++?+?++-??+?+++	0.5305	36110
rs6749422	2	25150011	c	g	0.5376	-0.0721	0.0077	5.774e-21	-------++---+--------?--?---	0.1458	38667.9
rs10182181	2	25150296	a	g	0.5378	-0.0703	0.0075	5.872e-21	-------+----+-----------+---	0.1648	39721
rs6548239	2	635154	a	g	0.8341	0.0991	0.0106	6.179e-21	+++++++++++++++?+?++-??+?+++	0.5217	36110
rs6719980	2	651507	t	c	0.8329	0.099	0.0106	6.473e-21	+-+++++++++++++?+?++-??+?+++	0.4118	36110
rs13393304	2	637830	a	g	0.1656	-0.0988	0.0105	6.693e-21	---------------?-?--+??-?---	0.5075	36110
rs10173167	2	646767	a	g	0.8331	0.0988	0.0105	6.699e-21	+-+++++++++++++?+?++-??+?+++	0.4459	36110
rs10190052	2	646674	t	c	0.1669	-0.0987	0.0105	6.798e-21	-+-------------?-?--+??-?---	0.446	36109.9
rs4854345	2	638190	a	g	0.1655	-0.0988	0.0105	7.12e-21	---------------?-?--+??-?---	0.5054	36110
rs6752378	2	25150116	a	c	0.4621	0.0701	0.0075	7.49e-21	+++++++--+++-+++++++++++-+++	0.1515	39724
rs11127488	2	646061	t	c	0.1669	-0.0986	0.0105	7.548e-21	-+-------------?-?--+??-?---	0.4496	36109.9
rs11127490	2	646110	t	c	0.8331	0.0986	0.0105	7.562e-21	+-+++++++++++++?+?++-??+?+++	0.4499	36109.9
rs11127489	2	646081	t	c	0.8331	0.0986	0.0105	7.574e-21	+-+++++++++++++?+?++-??+?+++	0.4499	36109.9
rs7559447	2	645646	t	c	0.8331	0.0986	0.0105	7.618e-21	+-+++++++++++++?+?++-??+?+++	0.4496	36109.9
rs7567368	2	645082	t	c	0.1669	-0.0986	0.0105	7.733e-21	-+-------------?-?--+??-?---	0.4491	36109.9
rs13387090	2	650974	t	g	0.1458	-0.1032	0.011	8.16e-21	-+----+------------+++------	0.1105	39618.1
rs11127491	2	646145	t	c	0.1665	-0.0988	0.0106	8.353e-21	-+-------------?-?--+??-?---	0.4433	36110
rs12714413	2	642253	t	c	0.1669	-0.0985	0.0105	8.707e-21	-+-------------?-?--+??-?---	0.4498	36109.9
rs10865550	2	641718	t	g	0.1669	-0.0985	0.0105	8.718e-21	-+-------------?-?--+??-?---	0.4498	36110
rs10185143	2	25150758	t	c	0.537	-0.071	0.0076	9.483e-21	-------+----+-----------+---	0.1322	39618
rs6731872	2	624205	t	g	0.1677	-0.0983	0.0105	9.581e-21	---------------?-?--+??-?---	0.52	36110
rs2903489	2	649638	t	c	0.169	-0.0983	0.0105	9.905e-21	-+-------------?-?--+??-?---	0.4755	36110
rs713586	2	25158008	t	c	0.5321	-0.0744	0.008	1.141e-20	-?-??--+--?-?--------?--?---	0.4975	36013
rs4423631	2	648758	t	c	0.1685	-0.0979	0.0105	1.147e-20	-+-------------?-?--+??-?---	0.5559	36110
rs10182458	2	25150641	a	g	0.5383	-0.0709	0.0076	1.155e-20	-------+----+-----------+---	0.1614	39618
rs35628463	2	653581	a	g	0.1668	-0.0993	0.0107	1.28e-20	-+-------------?-?--+??-?---	0.4908	36109.9
rs13013021	2	632723	t	c	0.8351	0.0987	0.0106	1.301e-20	+++++++++++++++?+?++-??+?+++	0.5002	36110.1
rs6548240	2	636929	a	c	0.8305	0.0982	0.0105	1.329e-20	+++++++++++++++?+?++-??+?+++	0.471	36110
rs7570993	2	652565	a	g	0.8334	0.0987	0.0106	1.402e-20	+-+++++++++++++?+?++-??+?+++	0.4645	36110
rs35913461	2	653575	t	c	0.1663	-0.0991	0.0107	1.59e-20	-+-------------?-?--+??-?---	0.4916	36109.9
rs7604752	2	643428	a	c	0.8343	0.0982	0.0106	1.645e-20	+-+++++++++++++?+?++-??+?+++	0.4637	36110.1
rs13028310	2	632591	t	c	0.2027	-0.0933	0.01	1.661e-20	----------------?--+--------	0.3911	38159.9
rs10190313	2	647577	a	g	0.1698	-0.0975	0.0105	1.875e-20	-+-------------?-?--+??-?---	0.3885	36110
rs13415094	2	653093	t	c	0.8334	0.0983	0.0106	2.463e-20	+-+++++++++++++?+?++-??+?+++	0.5036	36110
rs7594220	2	643320	a	g	0.8304	0.0971	0.0105	2.703e-20	+-+++++++++++++?+?++-??+?+++	0.5264	36110
rs2384054	2	25156773	t	c	0.5327	-0.0697	0.0076	4.045e-20	-------+----+-----------+---	0.1886	39618
rs6548238	2	634905	t	c	0.1669	-0.1005	0.011	4.323e-20	-?-??-----?-?--?-?--+??-?---	0.4303	33455
rs713587	2	25158281	t	c	0.4655	0.0695	0.0076	4.437e-20	+++++++-++++-++++++++?++?+++	0.1719	38774
rs7138803	12	50247468	a	g	0.3666	0.0729	0.008	7.115e-20	+?+??+-+++?+?+++++++++++++++	0.1954	37067
rs2867131	2	610603	t	c	0.1639	-0.0972	0.0107	8.435e-20	-+-------------?-?---??-?---	0.4652	36110
rs7563362	2	620297	a	g	0.1517	-0.1021	0.0112	8.829e-20	-+-----------------+-??-?---	0.2001	37035.1
rs5017304	2	630903	a	g	0.2108	-0.0918	0.0101	1.165e-19	----------------?--+-?--?---	0.4038	37209.9
rs10865320	2	25159780	a	g	0.5502	-0.0697	0.0077	1.368e-19	------------+-----------+---	0.3875	39618
rs6738433	2	25159501	c	g	0.4487	0.0695	0.0077	1.906e-19	++++++++++++-+++++++++++-+++	0.3311	39618
rs6746013	2	25143649	c	g	0.5409	-0.0717	0.0079	1.973e-19	-------++---+?-------?--?---	0.1242	37093
rs6728219	2	25159172	t	c	0.5512	-0.0701	0.0078	2.338e-19	------------+--------?--?---	0.2311	38667.9
rs62105307	2	633661	a	g	0.2016	-0.0909	0.0101	2.416e-19	---------------???-+-+------	0.3294	37235
rs77935490	2	630902	a	t	0.2141	-0.092	0.0102	2.723e-19	------------?---?--+-?--?---	0.4304	36154.1
rs74832795	2	632592	a	g	0.7967	0.092	0.0103	3.466e-19	+++++++++++++++???+-+?++?+++	0.4095	36284.9
rs6749087	2	629818	a	t	0.2058	-0.0892	0.01	4.231e-19	----------------?--+-+------	0.5981	38160.1
rs13035713	2	633659	t	c	0.2035	-0.09	0.0101	5.11e-19	---------------???-+-+------	0.3537	37234.9
rs6749170	2	25110962	a	g	0.5657	-0.0678	0.0076	5.695e-19	--------+---+-----------+---	0.2129	39618
rs2033654	2	25103108	a	c	0.4331	0.0667	0.0075	6.545e-19	++++++++-+++-+++++++++++-+++	0.2579	39725
rs2683992	2	600575	t	g	0.8268	0.0937	0.0106	7.023e-19	+-+++++++++++++?+?+++??+?+++	0.5965	36110
rs6545790	2	25109302	a	g	0.5669	-0.0674	0.0076	8.061e-19	--------+---+-----------+---	0.2403	39618
rs7132908	12	50263148	a	g	0.3762	0.0704	0.008	1.124e-18	++++-+-+++?+-+++?-+++-++++++	0.009398	38002
rs13407913	2	25097644	a	g	0.5652	-0.0661	0.0075	1.377e-18	--------+---+-----------+---	0.3788	39717
rs13003430	2	25134344	t	c	0.5692	-0.0669	0.0076	1.406e-18	--------+---+-----------+---	0.23	39618
rs6721750	2	25128719	a	g	0.5686	-0.0662	0.0075	1.408e-18	--------+---+-----------+---	0.2288	39724
rs2033653	2	25103446	t	c	0.5658	-0.0668	0.0076	1.506e-18	--------+---+-----------+---	0.2658	39618
rs11693654	2	25107597	t	c	0.5724	-0.0676	0.0077	1.598e-18	--------+---+-----------+---	0.2815	39618
rs6545806	2	25124348	a	g	0.4308	0.0668	0.0076	1.625e-18	++++++++-+++-+++++++++++-+++	0.2078	39618
rs6754997	2	25133750	a	g	0.4308	0.0668	0.0076	1.668e-18	++++++++-+++-+++++++++++-+++	0.2228	39617.9
rs3205718	12	50261809	t	c	0.3656	0.0712	0.0081	1.764e-18	++++-+-+++++-+++?-+++-++++++	0.03633	38160
rs10206196	2	25137323	t	c	0.5685	-0.0669	0.0076	1.793e-18	--------+---+-----------+---	0.1961	39618
rs6545776	2	25099357	a	c	0.5647	-0.0667	0.0076	1.887e-18	--------+---+-----------+---	0.3606	39618
rs1550110	2	25124563	t	c	0.5691	-0.0666	0.0076	2.019e-18	--------+---+-----------+---	0.2146	39618
rs4077678	2	25122840	c	g	0.5688	-0.0667	0.0076	2.026e-18	--------+---+-----------+---	0.207	39618.1
rs28836469	2	25117215	a	g	0.5697	-0.0666	0.0076	2.107e-18	--------+---+-----------+---	0.2628	39618
rs3903070	2	25123463	c	g	0.5693	-0.0666	0.0076	2.172e-18	--------+---+-----------+---	0.2266	39618.1
rs6545813	2	25131287	t	c	0.4295	0.0667	0.0076	2.184e-18	++++++++-+++-+++++++++++-+++	0.1823	39617.9
rs6744205	2	25133148	t	c	0.5691	-0.0665	0.0076	2.25e-18	--------+---+-----------+---	0.2094	39618
rs2384058	2	25100328	a	g	0.5644	-0.0665	0.0076	2.271e-18	--------+---+-----------+---	0.3269	39618.1
rs6752483	2	25120086	t	c	0.4307	0.0665	0.0076	2.308e-18	++++++++-+++-+++++++++++-+++	0.2477	39618
rs2033656	2	25100902	c	g	0.5645	-0.0665	0.0076	2.371e-18	--------+---+-----------+---	0.336	39618
rs6545814	2	25131316	a	g	0.5704	-0.0666	0.0076	2.38e-18	--------+---+-----------+---	0.1797	39618
rs6545809	2	25126715	t	c	0.433	0.0665	0.0076	2.555e-18	++++++++-+++-+++++++++++-+++	0.2385	39617.9
rs6713978	2	25120851	t	c	0.5691	-0.0664	0.0076	2.563e-18	--------+---+-----------+---	0.2455	39618
rs6712981	2	25126230	a	g	0.5671	-0.0665	0.0076	2.576e-18	--------+---+-----------+---	0.245	39618
rs6723803	2	25120713	c	g	0.4309	0.0664	0.0076	2.576e-18	++++++++-+++-+++++++++++-+++	0.2458	39618
rs6756609	2	25121125	a	c	0.4308	0.0664	0.0076	2.58e-18	++++++++-+++-+++++++++++-+++	0.244	39618
rs2384059	2	25100338	t	c	0.4356	0.0664	0.0076	2.644e-18	++++++++-+++-+++++++++++-+++	0.3407	39618
rs6726199	2	25126328	c	g	0.433	0.0665	0.0076	2.644e-18	++++++++-+++-+++++++++++-+++	0.2419	39618.1
rs6717671	2	25127614	a	g	0.5676	-0.0665	0.0076	2.687e-18	--------+---+-----------+---	0.2322	39618
rs10200566	2	25130462	t	g	0.566	-0.0664	0.0076	2.704e-18	--------+---+-----------+---	0.2397	39618
rs7563204	2	25125075	t	g	0.567	-0.0665	0.0076	2.726e-18	--------+---+-----------+---	0.246	39618.1
rs876186	2	25125585	t	c	0.433	0.0665	0.0076	2.737e-18	++++++++-+++-+++++++++++-+++	0.245	39618
rs6724772	2	25128730	t	c	0.5672	-0.0664	0.0076	2.777e-18	--------+---+-----------+---	0.2338	39618
rs13410999	2	25097939	t	c	0.5641	-0.0663	0.0076	2.811e-18	--------+---+-----------+---	0.3754	39618
rs6705446	2	25118608	t	c	0.569	-0.0663	0.0076	2.89e-18	--------+---+-----------+---	0.2433	39618
rs6545800	2	25118885	t	c	0.431	0.0663	0.0076	2.965e-18	++++++++-+++-+++++++++++-+++	0.2409	39618
rs59086897	2	25145173	a	t	0.4316	0.0697	0.008	2.999e-18	+++++++--+++-+++?-++++++-+++	0.1213	38160
rs6722587	2	25132192	a	c	0.4309	0.0662	0.0076	3.049e-18	++++++++-+++-+++++++++++-+++	0.2055	39618.1
rs11892869	2	25096692	a	t	0.564	-0.0662	0.0076	3.052e-18	--------+---+-----------+---	0.3757	39618
rs12713422	2	25134497	a	c	0.5716	-0.0671	0.0077	3.074e-18	--------+---+--------?--?---	0.248	38668
rs13405307	2	650973	t	c	0.8558	0.1008	0.0116	3.195e-18	+-++++-++++++++?+?+--??+?+++	0.1661	36110.1
rs6733224	2	25130907	t	c	0.5668	-0.0661	0.0076	3.676e-18	--------+---+-----------+---	0.2248	39617.9
rs6730191	2	25130920	a	g	0.5668	-0.0661	0.0076	3.682e-18	--------+---+-----------+---	0.2246	39617.9
rs10165451	2	25115243	a	g	0.57	-0.0669	0.0077	3.706e-18	--------+---+--------?--?---	0.2922	38668
rs10198275	2	25130542	a	c	0.5671	-0.0661	0.0076	3.959e-18	--------+---+-----------+---	0.2483	39618
rs7580081	2	25097072	c	g	0.4365	0.066	0.0076	4.162e-18	++++++++-+++-+++++++++++-+++	0.3702	39618.1
rs10198356	2	25130592	a	g	0.5671	-0.066	0.0076	4.336e-18	--------+---+-----------+---	0.2392	39618
rs7567997	2	25096952	t	c	0.5626	-0.066	0.0076	4.621e-18	--------+---+-----------+---	0.364	39618
rs6706316	2	25128351	c	g	0.5673	-0.0667	0.0077	4.658e-18	--------+---+--------?--?---	0.2597	38668
rs7565460	2	25130073	t	c	0.4331	0.066	0.0076	4.67e-18	++++++++-+++-+++++++++++-+++	0.2467	39618
rs112502508	12	50246252	a	g	0.6319	-0.0679	0.0078	4.807e-18	----+-+-----+-----+-------+-	0.04632	39618
rs11689546	2	25130451	a	g	0.5673	-0.066	0.0076	4.876e-18	--------+---+-----------+---	0.2366	39618
rs11900505	2	25131986	a	c	0.5694	-0.0665	0.0077	5.255e-18	--------+---+--------?--?---	0.2233	38668
rs10203482	2	25136916	t	c	0.5705	-0.067	0.0077	5.312e-18	--------+---+--------?--?---	0.1814	38668
rs6718510	2	25122323	a	c	0.5845	-0.0686	0.0079	5.79e-18	--------+---+---?-------+---	0.1144	38160
rs6732341	2	629817	c	g	0.7914	0.086	0.01	5.794e-18	++++++++++++++++?++---++++++	0.48	38159.9
rs6718511	2	25122324	a	g	0.5856	-0.0686	0.008	6.945e-18	--------+---+---?-------+---	0.1206	38160
rs11689543	2	25130440	a	t	0.5675	-0.0663	0.0077	7.217e-18	--------+---+--------?--?---	0.258	38668
rs10203386	2	25136866	a	t	0.428	0.0664	0.0077	7.511e-18	++++++++-+++-++++++++?++?+++	0.173	38668
rs4430895	2	25161386	t	c	0.441	0.0685	0.008	8.005e-18	++++++++++++-+++?++++?++?+++	0.4113	37210.1
rs4459693	2	25161265	t	g	0.44	0.068	0.0079	8.095e-18	++++++++++++-+++?+++++++++++	0.3637	38160.1
rs13035244	2	25134009	t	c	0.5722	-0.0656	0.0076	8.18e-18	--------+---+-----------+---	0.2093	39618
rs7576172	2	25129787	a	g	0.5706	-0.0658	0.0077	1.171e-17	-------++---+-----------+---	0.233	39617.9
rs4343432	2	25161236	a	g	0.5548	-0.0668	0.0078	1.331e-17	------------+---?-----------	0.5065	38160.1
rs13028737	2	630782	a	g	0.7647	0.084	0.0098	1.431e-17	++++++++++++++++?++--+++++++	0.4986	38160
rs2384061	2	25135620	a	g	0.4089	0.0645	0.0076	1.544e-17	++++++++++++-+++++++++++-+++	0.2418	39725
rs17817449	16	53813367	t	g	0.6017	-0.0683	0.008	1.69e-17	-?-??-+++-?-?-+----+--------	0.0004523	36963
rs11675198	2	25107589	c	g	0.4103	0.0666	0.0078	1.705e-17	++++++++++++-++++++++?++?+++	0.3079	38668
rs1865689	2	25108197	t	c	0.5852	-0.0654	0.0077	1.716e-17	------------+-----------+---	0.2264	39618
rs35803386	2	25105921	t	c	0.4088	0.0654	0.0077	1.861e-17	+++++++-++++-+++++++++++-+++	0.246	39618
rs7605335	2	25109317	a	g	0.4148	0.0653	0.0077	1.935e-17	++++++++++++-+++++++++++-+++	0.2171	39618.1
rs11686663	2	25107759	t	c	0.4149	0.0652	0.0077	2.134e-17	++++++++++++-+++++++++++-+++	0.2146	39618
rs8050136	16	53816275	a	c	0.3995	0.067	0.0079	2.244e-17	+?+??+---+?+?+-++++-++++++++	0.000372	37070
rs916485	2	25082273	t	c	0.567	-0.0646	0.0076	2.409e-17	--------+---+-----------+---	0.4592	39618
rs2384055	2	25085268	a	t	0.3918	0.0687	0.0081	2.478e-17	+++++++-++++-+++?+++++++-+++	0.2925	38160
rs2033655	2	25101092	a	g	0.416	0.0641	0.0076	2.624e-17	++++++++++++-+++++++++++-+++	0.3053	39725
rs6737082	2	25138040	a	c	0.5389	-0.0646	0.0076	2.901e-17	----+---+---+----+------+---	0.1138	39618
rs9939609	16	53820527	a	t	0.3999	0.0685	0.0081	3.184e-17	+?+??+---+?+?+-?+?+-++++++++	0.000325	36038
rs7591460	2	25103967	a	c	0.5837	-0.0655	0.0078	3.202e-17	------------+--------?--?---	0.2946	38668
rs10865315	2	25100738	a	c	0.4157	0.0649	0.0077	3.3e-17	++++++++++++-+++++++++++-+++	0.2914	39618
rs10865321	2	25159855	t	c	0.567	-0.0673	0.008	3.346e-17	------------+---?-------+---	0.3008	38160
rs2118826	2	25191745	a	t	0.4746	0.0666	0.0079	3.44e-17	++++++++++++-+++?+++++++++++	0.787	38160
rs34697209	2	25127394	a	g	0.5846	-0.0651	0.0077	4.233e-17	------------+--------?--?---	0.2906	38668.1
rs6725517	2	25129473	a	g	0.5846	-0.0644	0.0077	4.276e-17	------------+-----------+---	0.2167	39618
rs62033403	16	53822237	a	g	0.6014	-0.065	0.0077	4.304e-17	----+-+++-+---+----+--------	0.0005505	39618
rs11683929	2	25091869	a	g	0.5848	-0.0643	0.0077	4.727e-17	------------+-----------+---	0.3186	39618
rs13019149	2	25093151	t	c	0.4128	0.0645	0.0077	5.721e-17	++++++++++++-+++++++++++-+++	0.2488	39618
rs2947415	2	609177	a	g	0.2468	-0.0824	0.0098	5.839e-17	-+--------------?---+-------	0.8993	38160
rs62033399	16	53810943	t	c	0.3979	0.0645	0.0077	6.954e-17	++++-+---+-+++-++++-++++++++	0.0004963	39617.9
rs12367809	12	50256063	t	c	0.3625	0.0675	0.0081	6.999e-17	++++-+-+++++-+++?-++++++++++	0.02932	38160
rs1421085	16	53800954	t	c	0.5924	-0.0677	0.0081	7.818e-17	-?-??-+++-?-?-+-?--+--------	0.001747	35505
rs1529897	2	25086827	t	g	0.5833	-0.0638	0.0077	7.895e-17	------------+-----------+---	0.3194	39618
rs2384057	2	25100167	c	g	0.5852	-0.064	0.0077	8.02e-17	------------+-----------+---	0.3125	39618.1
rs10865322	2	25159858	a	g	0.5698	-0.0667	0.008	8.087e-17	------------+---?---+---+---	0.3013	38160
rs1541984	2	25082414	a	g	0.4134	0.063	0.0076	8.864e-17	++++++++++++-+++++++++++-+++	0.3842	39724
rs11075989	16	53819877	t	c	0.399	0.0642	0.0077	9.415e-17	++++-+---+-+++-++++-++++++++	0.0006727	39618
rs11075988	16	53819771	a	g	0.399	0.0641	0.0077	1.036e-16	++++-+---+-+++-++++-++++++++	0.000716	39618
rs8043757	16	53813450	a	t	0.6022	-0.0641	0.0077	1.057e-16	----+-+++-+---+----+--------	0.000587	39618
rs66908032	16	53822142	a	c	0.3986	0.0649	0.0078	1.1e-16	++++-+---+-+++-?+?+-++++++++	0.0002691	38693
rs72803697	16	53822183	t	c	0.3986	0.0648	0.0078	1.122e-16	++++-+---+-+++-?+?+-++++++++	0.0002671	38693
rs62105306	2	633660	t	c	0.7367	0.0809	0.0098	1.159e-16	++++++++++++++++?++---++++++	0.3051	38160
rs9923233	16	53819198	c	g	0.399	0.0639	0.0077	1.24e-16	++++-+---+-+++-++++-++++++++	0.0006037	39618
rs56313538	16	53818834	a	g	0.601	-0.0639	0.0077	1.308e-16	----+-+++-+---+----+--------	0.0005906	39618
rs1558902	16	53803574	a	t	0.4075	0.068	0.0082	1.318e-16	+?+??+---+?+?+-???+-++++++++	0.0007144	34580
rs7185735	16	53822651	a	g	0.5998	-0.0647	0.0078	1.346e-16	----+-+++-+---+?-?-+--------	0.0004981	38693
rs7564167	2	645190	a	g	0.0673	-0.1324	0.0161	1.716e-16	---------------------+--+---	0.3049	39618
rs7187250	16	53810546	a	c	0.3982	0.0644	0.0078	1.728e-16	++++-+---+-+++-?+?+-++++++++	0.0002601	38693.1
rs7202296	16	53821690	a	g	0.601	-0.0643	0.0078	1.898e-16	----+-+++-+---+?-?-+--------	0.0002957	38693
rs7206410	16	53821297	t	c	0.601	-0.0643	0.0078	1.902e-16	----+-+++-+---+?-?-+--------	0.0003026	38693
rs10186242	2	25130684	t	c	0.4086	0.0661	0.008	1.908e-16	+++++++--+++-+++?++-++++-+++	0.0913	38160
rs7193144	16	53810686	t	c	0.6023	-0.0642	0.0078	1.992e-16	----+-+++-+---+?-?-+--------	0.0002726	38693
rs11075992	16	53820066	t	c	0.601	-0.0642	0.0078	2.119e-16	----+-+++-+---+?-?-+--------	0.0003534	38692.9
rs9937709	16	53820813	a	g	0.5852	-0.0631	0.0077	2.212e-16	----+-+++-+---+--------+----	0.0001396	39617.9
rs11687089	2	25082926	t	c	0.5863	-0.0629	0.0077	2.294e-16	------------+-----------+---	0.3945	39618
rs11075991	16	53819937	a	t	0.601	-0.0641	0.0078	2.327e-16	----+-+++-+---+?-?-+--------	0.0003412	38693
rs11075990	16	53819893	a	g	0.601	-0.064	0.0078	2.413e-16	----+-+++-+---+?-?-+--------	0.0003332	38693
rs11675457	2	25079770	t	c	0.4148	0.0628	0.0077	2.481e-16	++++++++++++-+++++++++++-+++	0.3897	39618.1
rs1121980	16	53809247	a	g	0.4282	0.066	0.0081	2.499e-16	+?+??+---+?+?+-+?++++++-++++	0.0001163	35505.1
rs35177510	2	25089594	a	c	0.4204	0.0627	0.0077	2.543e-16	++++++++++++-+++++++++++-+++	0.4151	39618
rs8063057	16	53812433	t	c	0.6021	-0.064	0.0078	2.544e-16	----+-+++-+---+?-?-+--------	0.0002531	38692.9
rs8051591	16	53816752	a	g	0.6017	-0.0639	0.0078	2.555e-16	----+-+++-+---+?-?-+--------	0.0002776	38693
rs9926289	16	53820503	a	g	0.3996	0.0639	0.0078	2.601e-16	++++-+---+-+++-?+?+-++++++++	0.0002951	38693
rs9935401	16	53816838	a	g	0.3983	0.0638	0.0078	2.62e-16	++++-+---+-+++-?+?+-++++++++	0.0002787	38693
rs9923312	16	53819367	a	g	0.399	0.0638	0.0078	2.975e-16	++++-+---+-+++-?+?+-++++++++	0.0003008	38693
rs9972653	16	53814363	t	g	0.3979	0.0638	0.0078	2.993e-16	++++-+---+-+++-?+?+-++++++++	0.0002664	38693
rs9936385	16	53819169	t	c	0.601	-0.0638	0.0078	3.134e-16	----+-+++-+---+?-?-+--------	0.0002996	38692.9
rs3751814	16	53818724	a	g	0.399	0.0637	0.0078	3.309e-16	++++-+---+-+++-?+?+-++++++++	0.000288	38693
rs1172294	2	25169200	a	g	0.5354	-0.0635	0.0078	3.348e-16	------------+---?-----------	0.7586	38160
rs1893492	12	50270855	t	g	0.6391	-0.066	0.0081	4.12e-16	----+-+-----+---?+---+------	0.008929	38160
rs7306275	12	50250111	a	g	0.365	0.0672	0.0083	4.904e-16	+-++-+-+++++-+++?+-+++++++++	0.0502	38160
rs297924	12	50285061	t	c	0.615	-0.063	0.0078	5.087e-16	------+-----+---?-+--+------	0.04387	38267
rs3731623	2	25163783	t	c	0.5376	-0.0629	0.0078	6.249e-16	------------+---?-----------	0.725	38160.1
rs73116325	12	50275385	t	c	0.3489	0.0657	0.0081	6.385e-16	++++-+-+++++-+++?++++-++++++	0.01845	38160
rs7201850	16	53821862	t	c	0.415	0.0628	0.0078	6.623e-16	++++-+---+-+++-?+?+++++-++++	6.195e-05	38693
rs62033404	16	53822239	a	g	0.6019	-0.0632	0.0078	6.713e-16	----+-+++-+---+----+-?--?---	0.001109	38668
rs56094641	16	53806453	a	g	0.5931	-0.0637	0.0079	6.981e-16	----+-+++-+---+???-+--------	0.000664	37235
rs62048402	16	53803223	a	g	0.4068	0.0636	0.0079	8.397e-16	++++-+---+-+++-???+-++++++++	0.0006479	37235.1
rs11642015	16	53802494	t	c	0.4068	0.0634	0.0079	9.769e-16	++++-+---+-+++-???+-++++++++	0.0006296	37235
rs55872725	16	53809123	t	c	0.4069	0.0634	0.0079	9.803e-16	++++-+---+-+++-???+-++++++++	0.0006092	37235
rs9933509	16	53818167	t	c	0.5851	-0.0622	0.0078	1.075e-15	----+-+++-+---+?-?-----+----	5.961e-05	38693
rs11169199	12	50280430	t	c	0.633	-0.0645	0.0081	1.104e-15	------+-----+---?----+------	0.1351	38160
rs58048722	2	25187825	t	c	0.5349	-0.0627	0.0078	1.245e-15	------------+---?----?--?---	0.6315	37210
rs4665736	2	25187599	t	c	0.5409	-0.0658	0.0082	1.363e-15	-?-??--+--?-?---?----?--?---	0.8461	34555.1
rs34932517	2	25281641	t	c	0.5046	-0.0637	0.008	1.38e-15	------------+---?---+-------	0.7215	38159.9
rs73116335	12	50285780	t	g	0.6315	-0.0633	0.0079	1.474e-15	------+-----+---?----+------	0.1115	38160
rs543874	1	177889480	a	g	0.8076	-0.0793	0.0099	1.616e-15	-?-??-----?-?---------+---+-	0.1408	36963
rs12146733	12	50270364	c	g	0.3411	0.066	0.0083	1.627e-15	++++-+-+++++-+++?+++++++++++	0.03367	38160
rs9930333	16	53799977	t	g	0.5726	-0.064	0.008	1.763e-15	-?-??-+++-?-?-+???-+---+----	8.064e-05	34687
rs1470039	2	25193469	c	g	0.5349	-0.0623	0.0078	1.812e-15	------------+---?----?--?---	0.6494	37210
rs10913469	1	177913519	t	c	0.8099	-0.0785	0.0099	1.871e-15	-?-??-----?-?---------+---+-	0.2433	37070
rs9940278	16	53800200	t	c	0.4259	0.0617	0.0078	1.892e-15	++++-+---+-+-+-+?++-+++-++++	0.0002579	38160
rs9931900	16	53818813	a	g	0.5863	-0.0617	0.0078	1.947e-15	----+-+++-+---+?-?-----+----	8.124e-05	38693
rs1077492	2	25286435	t	c	0.5381	-0.061	0.0077	1.971e-15	------------+---?-----------	0.7032	38259
rs62143001	2	25288675	a	g	0.5347	-0.0615	0.0078	2.41e-15	------------+---?---+-------	0.7294	38160
rs6736210	2	25131161	t	c	0.5983	-0.064	0.0081	2.589e-15	-------++---+---?--+----+---	0.06994	38160.1
rs1421086	16	53801343	a	c	0.4262	0.0613	0.0078	2.686e-15	++++-+---+-+-+-+?++-+++-++++	0.0002119	38160
rs17201502	12	50285562	t	c	0.3531	0.0625	0.0079	2.692e-15	++++++-+++++-+++?-+++-++++++	0.02385	38267
rs7202116	16	53821615	a	g	0.6014	-0.0625	0.0079	2.779e-15	----+-+++-+---+?-?-+-?--?---	0.0005812	37743
rs2867121	2	658550	a	g	0.9237	0.124	0.0157	2.942e-15	+++++++++++++++?+?++-?++?+++	0.7747	37742.9
rs11075985	16	53805207	a	c	0.4264	0.0618	0.0078	3.233e-15	++++-+---+-+-+-???+++++-++++	5.481e-05	37235
rs1558901	16	53803187	a	t	0.5737	-0.0617	0.0078	3.35e-15	----+-+++-+-+-+???-----+----	5.658e-05	37234.9
rs79994966	16	53823727	t	c	0.6068	-0.0622	0.0079	3.527e-15	----+-+++-+---+-?--+--------	0.003685	38160
rs13003179	2	25269194	t	c	0.5355	-0.0612	0.0078	3.548e-15	------------+---?-----------	0.7291	38160
rs13029479	2	655222	a	g	0.1143	-0.0965	0.0123	3.693e-15	---------------------+------	0.2308	39724
rs1971136	2	25291539	t	c	0.5336	-0.0612	0.0078	3.838e-15	------------+---?---+-------	0.7444	38160
rs6720580	2	25270433	t	c	0.465	0.0617	0.0079	4.009e-15	++++++++++++-+++?++++?++?+++	0.6449	37210
rs12466350	2	25239969	t	c	0.5341	-0.061	0.0078	4.033e-15	------------+---?-----------	0.8065	38160
rs9937354	16	53799847	a	g	0.4257	0.0616	0.0078	4.211e-15	++++-+---+-+-+-???+-+++-++++	0.0001196	37235
rs9941349	16	53825488	t	c	0.4106	0.0626	0.008	4.312e-15	+?+??+---+?+?+-+?+++++++++++	0.0009249	35603
rs11689570	2	25245500	a	g	0.5309	-0.0614	0.0078	4.337e-15	------------+---?-----------	0.7654	38160
rs9928094	16	53799905	a	g	0.5743	-0.0615	0.0078	4.35e-15	----+-+++-+-+-+???-+---+----	0.0001208	37235
rs62140636	2	25233811	t	c	0.4669	0.061	0.0078	4.481e-15	++++++++++++-+++?+++-+++++++	0.7302	38160
rs6718628	2	25131170	c	g	0.5982	-0.0641	0.0082	4.555e-15	-------++---+---?--+-?--?---	0.07673	37210
rs9937053	16	53799507	a	g	0.4256	0.0614	0.0078	5.263e-15	++++-+---+-+-+-???+-+++-++++	0.0001016	37235
rs13008590	2	630788	a	g	0.2833	-0.0767	0.0098	5.431e-15	----------------?--++?--?---	0.6315	37210
rs11682135	2	25205377	a	g	0.5217	-0.062	0.0079	5.517e-15	------------+---?----?--?---	0.6523	37210.1
rs4665276	2	25213333	t	c	0.5357	-0.0611	0.0078	5.815e-15	------------+---?----?--?---	0.676	37210
rs11125884	2	25239264	a	g	0.4654	0.0607	0.0078	5.987e-15	++++++++++++-+++?+++++++++++	0.813	38160
rs9940128	16	53800754	a	g	0.4262	0.0612	0.0078	6.049e-15	++++-+---+-+-+-???+++++-++++	9.872e-05	37235
rs9930397	16	53799985	a	t	0.4259	0.0612	0.0078	6.113e-15	++++-+---+-+-+-???+-+++-++++	0.0001144	37235
rs9940646	16	53800629	c	g	0.5739	-0.0611	0.0078	6.513e-15	----+-+++-+-+-+???-+---+----	9.082e-05	37235
rs9923544	16	53801985	t	c	0.4262	0.0611	0.0078	6.55e-15	++++-+---+-+-+-???+-+++-++++	9.154e-05	37235.1
rs9939973	16	53800568	a	g	0.4261	0.0611	0.0078	6.645e-15	++++-+---+-+-+-???+-+++-++++	8.732e-05	37235
rs62033405	16	53822387	t	c	0.3935	0.0612	0.0079	6.695e-15	++++-+---+-+++-+?++-++++++++	0.006465	38160
rs6545766	2	25077856	t	c	0.3966	0.0621	0.008	6.817e-15	+++-++++++++-+++?++++?-+?+++	0.3021	37210
rs9923147	16	53801549	t	c	0.4262	0.061	0.0078	6.908e-15	++++-+---+-+-+-???+-+++-++++	9.382e-05	37234.9
rs12618252	2	25207950	a	g	0.5358	-0.0601	0.0077	7.055e-15	------------+---?-----------	0.7549	38160
rs7608976	2	25075281	a	g	0.4119	0.0612	0.0079	7.525e-15	++++++++++++-+++?+++++-+-+++	0.4449	38159.9
rs17817712	16	53821125	a	g	0.6063	-0.0609	0.0079	8.242e-15	----+-+++-+---+-?--+--------	0.006993	38160.1
rs13387729	2	25076126	a	g	0.5846	-0.0609	0.0078	8.331e-15	------------+---?-----+-+---	0.3288	38160
rs539515	1	177889025	a	c	0.8076	-0.0741	0.0096	9.504e-15	------------+---------+---+-	0.1458	39618
rs62033400	16	53811788	a	g	0.6061	-0.0607	0.0078	1.052e-14	----+-+++-+---+-?--+--------	0.005753	38160
rs1982200	2	25205427	t	c	0.5378	-0.0596	0.0077	1.104e-14	------------+---?----?--?---	0.6455	37315
rs7206629	16	53821413	t	c	0.5854	-0.0607	0.0079	1.117e-14	----+-+++-+---+?-?---?-+?---	0.00014	37743
rs3751812	16	53818460	t	g	0.3943	0.0598	0.0077	1.156e-14	++++-+---+-+++-+?++-++++++++	0.006562	38265
rs7597332	2	25075675	a	g	0.5847	-0.0606	0.0078	1.194e-14	------------+---?-----+-+---	0.3625	38160
rs56137030	16	53825905	a	g	0.3953	0.0606	0.0079	1.306e-14	++++-+---+-+++-+?++-++++++++	0.007805	38160
rs9927317	16	53820996	c	g	0.6084	-0.0605	0.0079	1.841e-14	----+-++--+---+-?--+--------	0.01073	38160
rs10468280	16	53827479	a	g	0.6064	-0.0608	0.0079	1.913e-14	----+-+++-+---+???-+--------	0.00323	37235
rs28567725	16	53826028	t	c	0.59	-0.0595	0.0078	2.09e-14	----+-+++-+---+-?-----------	0.001159	38159.9
rs7190396	16	53822502	t	g	0.6053	-0.0607	0.0079	2.1e-14	----+-+++-+---+-?--+--------	0.003391	38160
rs9931494	16	53827179	c	g	0.5905	-0.0595	0.0078	2.141e-14	----+-+++-+---+-?-----------	0.001113	38160
rs62033408	16	53827962	a	g	0.6064	-0.0607	0.0079	2.149e-14	----+-+++-+---+???-+--------	0.003498	37235
rs7206122	16	53822440	a	g	0.4036	0.0601	0.0079	2.195e-14	++++-+--++-+++-+?++-++++++++	0.01162	38160
rs506589	1	177894287	t	c	0.8063	-0.073	0.0096	2.337e-14	------------+---------+---+-	0.1367	39618.1
rs509325	1	177894591	t	g	0.8063	-0.0729	0.0096	2.44e-14	------------+---------+---+-	0.1348	39618
rs12042908	1	74997762	a	g	0.4603	0.0586	0.0077	2.765e-14	++++++-+++-++++?+?++++++++-+	0.7525	38693
rs17817964	16	53828066	t	c	0.395	0.0604	0.0079	2.867e-14	++++-+---+-+++-???+-++++++++	0.003318	37235
rs2344508	1	74999713	a	g	0.5393	-0.0584	0.0077	3.125e-14	------+---+----?-?--------+-	0.7526	38693
rs545608	1	177899121	c	g	0.1938	0.0726	0.0096	3.159e-14	++++++++++++-+++++++++-+++-+	0.162	39618.1
rs9930506	16	53830465	a	g	0.5728	-0.0613	0.0081	3.249e-14	-?-??-+++-?-?-+-?--+---+----	0.000753	35505
rs7574085	2	657578	c	g	0.234	-0.0697	0.0092	3.419e-14	-------++---+--?-?---+--+---	0.214	38692.9
rs563590	2	25331172	a	g	0.5174	0.0584	0.0077	3.628e-14	++++++++++++-+++++++-?++?+++	0.7341	38668
rs17817497	16	53815435	t	c	0.6062	-0.06	0.0079	3.703e-14	----+-+++-+---+???-+--------	0.003473	37235.1
rs546217	2	25311537	a	c	0.5149	0.0565	0.0075	4.034e-14	++++++++++++-++++++++-++-+++	0.7613	39722
rs7551507	1	74995225	t	c	0.5388	-0.0581	0.0077	4.171e-14	------+---+----?-?--------+-	0.7827	38693
rs4407278	2	648607	t	c	0.683	0.0712	0.0094	4.947e-14	+-++++++++-+++++?++-+?++?+++	0.4105	37210.1
rs7514705	1	75006720	t	c	0.46	0.058	0.0077	5.002e-14	++++++-+++-++++?+?++++++++-+	0.696	38693
rs11210476	1	74995450	a	g	0.4594	0.0578	0.0077	5.192e-14	++++++-+++-++++?+?++++++++-+	0.7606	38693
rs754536	2	25176200	t	c	0.5182	-0.0586	0.0078	5.26e-14	------------+---?-----------	0.7976	38160.1
rs7576788	2	25083310	t	c	0.5591	-0.0591	0.0079	5.368e-14	---+--+-----+---?-----+-+---	0.2766	38160
rs7302855	12	50244043	t	c	0.4455	0.0577	0.0077	5.592e-14	++++-+--++++-++++--+++++++-+	0.1397	39618
rs3845347	1	75004048	a	g	0.54	-0.0577	0.0077	5.999e-14	------+---+----?-?--------+-	0.7147	38693
rs754537	2	25176277	a	t	0.4813	0.0584	0.0078	6.28e-14	++++++++++++-+++?+++++++++++	0.7905	38160
rs7526762	1	74993318	a	g	0.4586	0.0576	0.0077	6.752e-14	++++++-+++-++++?+?++++++++-+	0.8011	38692.9
rs7520945	1	75004943	t	c	0.46	0.0576	0.0077	6.838e-14	++++++-+++-++++?+?++++++++-+	0.7082	38693
rs6604867	1	74992278	t	c	0.4596	0.0575	0.0077	7.017e-14	++++++-+++-++++?+?++++++++-+	0.8234	38693
rs12566985	1	75002193	a	g	0.5411	-0.0575	0.0077	7.33e-14	------+---+----?-?--------+-	0.6928	38693
rs7303074	12	50244024	a	g	0.4409	0.0574	0.0077	7.857e-14	++++-+--++++-+++++-+++++++-+	0.1682	39617.9
rs28429148	16	53798319	a	g	0.431	0.0595	0.008	7.965e-14	++++-+---+-+++-+?++++++-++++	0.00523	38160
rs141070800	12	50272835	a	g	0.5848	-0.0618	0.0083	8.016e-14	------------+---?---------+-	0.1532	38159.9
rs633715	1	177852580	t	c	0.7949	-0.0705	0.0094	8.081e-14	-?-??-----?-+---------+---+-	0.2565	38124.1
rs7553348	1	75005067	a	g	0.5412	-0.0574	0.0077	8.175e-14	------+---+----?-?--------+-	0.6887	38693
rs62033406	16	53824226	a	g	0.584	-0.0589	0.0079	8.796e-14	----+-++--+---+???----------	0.01483	37235
rs11684464	2	25340610	a	g	0.5429	0.057	0.0077	1.002e-13	++++++++++++-+++++++--++++++	0.7764	39618
rs475868	2	25318059	a	g	0.5172	0.0566	0.0076	1.012e-13	++++++++++++-++++++++-++-+++	0.7581	39618
rs2917916	2	25316336	a	c	0.517	0.0565	0.0076	1.081e-13	++++++++++++-++++++++-++-+++	0.7433	39618
rs661691	1	177861357	c	g	0.1979	0.0721	0.0097	1.1e-13	++++++++++++?++?+?++++-+++-+	0.3471	37637
rs8047587	16	53798622	t	g	0.4387	0.0582	0.0078	1.135e-13	++++-+---+-+-+-??++++++-++++	0.0007508	37786
rs10875982	12	50245706	a	g	0.5522	-0.0563	0.0076	1.142e-13	----+-+-----+--?-?+-------+-	0.1537	38800
rs2438679	2	25317653	t	c	0.4818	-0.0565	0.0076	1.146e-13	------------+--------+--+---	0.7598	39618
rs564667	2	25310860	a	t	0.5167	0.0563	0.0076	1.289e-13	++++++++++++-++++++++-++-+++	0.7262	39618
rs2918630	2	25314186	t	c	0.5169	0.0562	0.0076	1.318e-13	++++++++++++-++++++++-++-+++	0.7322	39618
rs1266155	1	177881424	a	g	0.1947	0.0701	0.0095	1.541e-13	++++++++++++-+++++++++-+++-+	0.2176	39618
rs497567	2	25335089	a	g	0.448	-0.0571	0.0077	1.627e-13	------------+-------+?--?---	0.8535	38668
rs522806	2	25316584	a	c	0.4512	-0.0561	0.0076	1.635e-13	------------+-------+?--?---	0.8625	38771
rs1514174	1	74993063	t	c	0.5415	-0.0567	0.0077	1.668e-13	------+---+----------?--?-+-	0.8411	38668
rs4650277	1	74993721	a	g	0.4569	0.0567	0.0077	1.73e-13	++++++-+++-++++?+?++++++++-+	0.7999	38693
rs62033413	16	53830055	c	g	0.5934	-0.0578	0.0078	1.734e-13	----+-+++-+---+-?--+--------	0.002508	38160.1
rs10875980	12	50244767	a	t	0.5538	-0.0567	0.0077	1.754e-13	----+-+-----+--?-?+-------+-	0.1532	38693.1
rs9930501	16	53830452	a	g	0.5736	-0.0572	0.0078	1.761e-13	----+-+++-+---+-?--+---+----	0.001063	38160
rs9932754	16	53830491	t	c	0.5741	-0.0571	0.0078	1.882e-13	----+-+++-+---+-?--+---+----	0.001044	38160
rs6726261	2	25153986	t	c	0.6478	-0.0581	0.0079	1.906e-13	-------++---+--------?+-?---	0.2362	38773
rs7569646	2	25152800	a	g	0.6468	-0.0583	0.0079	1.907e-13	-------++---+---------+-+---	0.1734	39618
rs9922619	16	53831771	t	g	0.4258	0.0572	0.0078	1.936e-13	++++-+---+-+++-+?++-+++-++++	0.000962	38160
rs633754	1	177879935	t	c	0.8048	-0.0698	0.0095	1.936e-13	------------+---------+---+-	0.2169	39618
rs11169182	12	50248052	t	c	0.4607	0.0559	0.0076	2.023e-13	++++-+-+++++-+++++-+++++++-+	0.09136	39618
rs567359	2	25304574	a	g	0.5433	0.0561	0.0076	2.035e-13	++++++++++++-+++++++--++++++	0.8014	39618
rs72805611	16	53831354	t	c	0.4052	0.0583	0.0079	2.097e-13	++++-+---+-+++-???+-++++++++	0.002044	37235
rs6604872	1	75004611	t	c	0.4606	0.0557	0.0076	2.126e-13	++++++-+++-++++?+?++++++++-+	0.6523	38799
rs9922708	16	53831146	t	c	0.4244	0.0571	0.0078	2.128e-13	++++-+---+-+++-+?++-+++-++++	0.0009998	38160
rs488817	2	25332696	t	c	0.4409	-0.0564	0.0077	2.128e-13	------------+-------++------	0.8553	39618
rs7553158	1	75005238	a	g	0.5405	-0.0556	0.0076	2.302e-13	------+---+----?-?--------+-	0.6228	38799
rs10218727	1	75012637	a	g	0.4193	0.0579	0.0079	2.327e-13	++++++--+--++++?+?++++++++-+	0.6082	38693
rs1530016	2	25305756	t	c	0.4505	-0.0556	0.0076	2.65e-13	------------+-------+?--?---	0.8638	38770
rs2577277	2	25310247	t	c	0.5513	0.0565	0.0077	2.687e-13	++++++++++++-+++++++-?++?+++	0.8605	38668
rs7299134	12	50243672	a	g	0.5527	-0.0563	0.0077	2.711e-13	----+-++----+--?-?+-------+-	0.1845	38693
rs551573	2	25305504	a	g	0.4564	-0.0557	0.0076	2.933e-13	------------+-------++------	0.7895	39618
rs530951	2	25307005	t	c	0.4481	-0.0561	0.0077	3.268e-13	------------+-------+?--?---	0.8674	38668
rs3895907	1	75006027	a	g	0.4593	0.0566	0.0078	3.276e-13	++++++-+++-++++?+?+++?++?+-+	0.6806	37743
rs4463912	12	50208014	t	c	0.4176	0.0563	0.0077	3.308e-13	+-++++++++++-+++++++++++++++	0.4275	39618
rs12041912	1	75003710	a	g	0.5389	-0.0566	0.0078	3.426e-13	------+---+----?-?---?--?-+-	0.7017	37743
rs12041852	1	75003500	a	g	0.5389	-0.0565	0.0078	3.449e-13	------+---+----?-?---?--?-+-	0.7017	37743
rs532504	1	177878933	a	g	0.1926	0.0706	0.0097	3.659e-13	++++++++++++-++?+?++++-+++-+	0.1454	38693
rs11075993	16	53837144	t	g	0.4061	0.0576	0.0079	3.766e-13	++++-+---+-+++-???+-++++++++	0.001562	37235
rs72805613	16	53837342	a	g	0.5939	-0.0576	0.0079	3.816e-13	----+-+++-+---+???-+--------	0.001563	37235
rs519111	2	25333735	t	c	0.5526	0.0555	0.0077	3.916e-13	++++++++++++-+++++++--++++++	0.8388	39618
rs11169176	12	50241013	a	g	0.4469	0.0559	0.0077	4.343e-13	++++-+--++++-++?+?-+++++++-+	0.2408	38693
rs7525548	1	75001474	a	t	0.4597	0.0562	0.0078	4.525e-13	+-++++-+++-++++?+?+++?++?+-+	0.6744	37743
rs512419	2	25310155	t	g	0.4496	-0.0558	0.0077	4.654e-13	------------+-------+?--?---	0.8741	38668
rs565906	2	25308576	t	c	0.5487	0.0555	0.0077	4.748e-13	++++++++++++-+++++++--++++++	0.786	39618
rs478222	2	25301755	a	t	0.5527	0.0552	0.0076	4.868e-13	++++++++++++-+++++++--++++++	0.8624	39618.1
rs9933040	16	53830867	a	t	0.4266	0.0568	0.0079	4.924e-13	++++-+---+-+++-???+-+++-++++	0.0006019	37235.1
rs3843262	1	75013054	a	t	0.4178	0.0573	0.0079	5.142e-13	++++++--+--++++?+?++-+++++-+	0.6006	38693
rs12149574	16	53840525	c	g	0.5939	-0.057	0.0079	5.368e-13	----+-+++-+---+??--+--------	0.00215	37786
rs2336448	12	50212628	t	c	0.415	0.0556	0.0077	5.535e-13	++++++++++++-+++++-+++++++++	0.5887	39618
rs12149832	16	53842908	a	g	0.4024	0.0569	0.0079	5.735e-13	++++-+---+-+++-+?++-++++++++	0.003386	38160
rs839652	2	25334340	t	c	0.449	-0.0552	0.0077	5.832e-13	------------+-------++------	0.8463	39618
rs493090	2	25303772	a	g	0.4476	-0.055	0.0076	5.961e-13	------------+-------++------	0.8662	39618
rs7316688	12	50240341	c	g	0.4455	0.055	0.0077	6.494e-13	++++-+--++++-++++--+++++++-+	0.1524	39618.1
rs483428	2	25305136	t	c	0.4474	-0.0548	0.0076	6.871e-13	------------+-------++------	0.8594	39618
rs487617	2	25309756	c	g	0.5522	0.0547	0.0076	7.029e-13	++++++++++++-+++++++--++++++	0.8593	39618
rs7313400	12	50204089	a	g	0.3896	0.0564	0.0079	7.911e-13	++++++-+++++-++?+?-+++++++++	0.4355	38693
rs7316671	12	50240304	a	g	0.446	0.0548	0.0077	8.102e-13	++++-+--++++-++++--+++++++-+	0.138	39618
rs4477562	13	54104968	t	c	0.1334	0.0802	0.0112	8.288e-13	++++++++-+++++-+++++++++++++	0.302	39618
rs2720291	12	50197385	a	g	0.3776	0.058	0.0081	8.412e-13	++++++-+++++-++???-+++++++++	0.2872	37235
rs693232	1	177881651	c	g	0.8044	-0.0686	0.0096	8.886e-13	------------+--?-?----+---+-	0.2057	38693
rs10789396	1	75014362	t	c	0.444	0.057	0.008	8.887e-13	++++++-+++-++++?+?++++++++-+	0.8507	38693
rs11169161	12	50206201	a	t	0.5866	-0.0551	0.0077	8.934e-13	-+----------+-----+---------	0.5614	39618
rs6669189	1	75011358	t	c	0.4188	0.0562	0.0079	9.371e-13	++++++--+--++++?+?++++++++-+	0.6058	38693
rs6695685	1	74998501	a	g	0.4184	0.0553	0.0078	9.925e-13	++++++--+--+++++++++++++++-+	0.6685	39618
rs9568867	13	54107352	a	g	0.1337	0.0799	0.0112	1.048e-12	++++++++-+++++-+++++++++++++	0.3412	39617.9
rs9568868	13	54107583	t	g	0.1337	0.0799	0.0112	1.054e-12	++++++++-+++++-+++++++++++++	0.3404	39618
rs480319	2	25318522	a	g	0.4484	-0.0547	0.0077	1.076e-12	------------+-------++------	0.7496	39618
rs1927861	13	54091759	t	c	0.1339	0.0801	0.0112	1.102e-12	++++++++-+++++-+++++++++++++	0.2955	39618
rs3765681	1	75007444	a	g	0.4184	0.0559	0.0079	1.104e-12	++++++--+--++++?+?++++++++-+	0.5117	38693
rs6604866	1	74992546	c	g	0.5429	-0.0553	0.0078	1.112e-12	------+---+----?-?---?--?-+-	0.8038	37743
rs670323	1	177868990	a	g	0.1956	0.0682	0.0096	1.168e-12	++++++++++++-++?+?++++-+++-+	0.2182	38693
rs73116339	12	50289667	a	g	0.3101	0.0617	0.0087	1.191e-12	++++++++++++-+++?+-+++++-+++	0.6652	38160
rs2603110	12	50199316	c	g	0.4119	0.0555	0.0078	1.21e-12	++++++++++++-++?+?-+++++++++	0.5546	38693
rs527248	1	177875514	a	g	0.8051	-0.0681	0.0096	1.218e-12	------------+--?-?----+---+-	0.211	38693
rs11210478	1	75008411	a	g	0.5795	-0.0554	0.0078	1.253e-12	------++-++----?-?--------+-	0.5518	38693
rs10875969	12	50206723	a	g	0.4152	0.0538	0.0076	1.276e-12	+-++++++++++-+++++-+++++++++	0.6146	39724
rs73116338	12	50289657	t	c	0.6893	-0.0616	0.0087	1.299e-12	------------+---?-+-----+---	0.6492	38160
rs490689	1	177873841	a	g	0.1949	0.068	0.0096	1.33e-12	++++++++++++-++?+?++++-+++-+	0.2116	38693.1
rs574367	1	177873210	t	g	0.195	0.068	0.0096	1.34e-12	++++++++++++-++?+?++++-+++-+	0.2123	38693.1
rs3765680	1	75007008	a	g	0.5785	-0.0553	0.0078	1.357e-12	------++-++----?-?--------+-	0.5386	38693
rs72805612	16	53834608	a	g	0.3943	0.0565	0.008	1.419e-12	++++-+---+-+++-+?++-++++++++	0.003112	38160
rs6604871	1	75008008	t	c	0.5797	-0.0553	0.0078	1.431e-12	------++-++----?-?--------+-	0.5548	38693
rs7188250	16	53834607	t	c	0.6033	-0.0564	0.008	1.433e-12	----+-+++-+---+-?--+--------	0.002871	38160
rs571567	1	177872905	a	g	0.1952	0.0679	0.0096	1.437e-12	++++++++++++-++?+?++++-+++-+	0.2048	38693
rs3894212	1	75001683	t	g	0.5792	-0.0552	0.0078	1.475e-12	------++-++----?-?--------+-	0.5287	38693
rs589500	1	177876946	t	c	0.1954	0.0678	0.0096	1.514e-12	++++++++++++-++?+?++++-+++-+	0.209	38692.9
rs2076308	6	50791640	c	g	0.1874	0.0697	0.0099	1.585e-12	++++-+-++--++++?+?-+++++++-+	0.4276	38693
rs1077498	12	50195390	a	g	0.6091	-0.0565	0.008	1.705e-12	------+-----+--???+---------	0.4712	37235
rs2603104	12	50189834	t	g	0.5871	-0.0551	0.0078	1.716e-12	------------+--?-?+---------	0.6078	38693
rs7305229	12	50260264	t	c	0.4477	0.0553	0.0078	1.727e-12	++++-+-+++++-+++?--+++++++-+	0.1925	38160
rs1075366	12	50192009	t	c	0.5863	-0.055	0.0078	1.906e-12	------------+--?-?+---------	0.6201	38693
rs7488361	12	50182265	t	c	0.5863	-0.0555	0.0079	1.924e-12	-+----------+---?-+---------	0.6657	38160
rs2603111	12	50199846	t	c	0.4134	0.0549	0.0078	1.997e-12	+-++++++++++-++?+?-+++++++++	0.5745	38693
rs2720298	12	50189807	a	c	0.3896	0.0564	0.008	2.03e-12	++++++-+++++-++???-+++++++++	0.4714	37235
rs6698622	1	74997956	a	g	0.42	0.0548	0.0078	2.072e-12	++++++--+--++++?+?++++++++-+	0.5977	38693
rs6703637	1	74997795	a	t	0.4193	0.055	0.0078	2.135e-12	++++++--+--++++?+?++++++++-+	0.5876	38693
rs12568287	1	75003812	t	c	0.5792	-0.0548	0.0078	2.139e-12	------++-++----?-?--------+-	0.543	38693
rs6698760	1	74997803	a	g	0.4192	0.055	0.0078	2.141e-12	++++++--+--++++?+?++++++++-+	0.5873	38693
rs729281	12	50196394	t	c	0.6073	-0.0553	0.0079	2.22e-12	------+-----+--???+---------	0.5576	37342
rs3798519	6	50788778	a	c	0.8137	-0.0692	0.0099	2.302e-12	----+-+--++----?-?+-------+-	0.4704	38693
rs59046026	12	50208261	t	c	0.3126	0.0586	0.0084	2.322e-12	++++++-+++++-+++?+++++-+++++	0.1055	38160
rs510107	2	25319471	a	g	0.4501	-0.0535	0.0076	2.462e-12	------------+-------++------	0.8755	39618
rs3843261	1	75000726	c	g	0.4197	0.0546	0.0078	2.508e-12	++++++--+--++++?+?++++++++-+	0.5527	38693
rs11210477	1	75005363	a	g	0.4198	0.0546	0.0078	2.529e-12	++++++--+--++++?+?++++++++-+	0.5521	38693
rs7133995	12	50253515	a	g	0.3865	-0.0553	0.0079	2.564e-12	--+---------+---?---------+-	0.3413	38160
rs79541760	6	50930848	a	t	0.825	-0.0702	0.01	2.607e-12	------+--++------+--------+-	0.3459	39618
rs630372	1	177885762	a	g	0.2191	0.0629	0.009	2.692e-12	+-++++++++++-+++++++++-+++++	0.1699	39722
rs4898530	12	50204709	a	g	0.585	-0.0545	0.0078	2.775e-12	-+----------+--?-?+---------	0.5513	38693
rs9937521	16	53799296	t	c	0.3879	0.0571	0.0082	3.037e-12	++++-+---+-+-+-+?++++++-++-+	0.001662	38160
rs7977112	12	50209618	t	c	0.4129	0.0544	0.0078	3.077e-12	+-++++++++++-++?+?-+++++++++	0.5332	38693
rs3798526	6	50809787	a	g	0.8141	-0.0689	0.0099	3.124e-12	----+-+--++----?-?+-------+-	0.4632	38692.9
rs4711965	6	50937412	a	t	0.1746	0.0708	0.0101	3.124e-12	++++++-++--++++?+?++++++++-+	0.2935	38693
rs2290442	12	50185334	a	g	0.583	-0.0557	0.008	3.237e-12	-+--------+-+--???+---------	0.5688	37235.1
rs62407779	6	50890084	t	c	0.1747	0.0693	0.01	3.341e-12	++++++-++--++++++--+++++++-+	0.3009	39617.9
rs62407774	6	50880604	t	c	0.8252	-0.0692	0.01	3.585e-12	------+--++------++-------+-	0.325	39618
rs3857599	6	50938247	a	c	0.1751	0.0696	0.01	3.672e-12	++++++-++--++++++-++++++++-+	0.2953	39618
rs1514173	1	74995110	t	c	0.4188	0.0543	0.0078	3.705e-12	++++++--+--++++?+?++++++++-+	0.6299	38693
rs72891717	6	50858235	a	t	0.1778	0.0699	0.0101	3.759e-12	++++++-++--++++?+?-+++++++-+	0.3054	38693
rs3857596	6	50905067	t	c	0.175	0.069	0.0099	4.056e-12	++++++-++--++++++--+++++++-+	0.3113	39618
rs1928185	6	50935513	t	c	0.826	-0.0705	0.0102	4.059e-12	------+--++----?-?--------+-	0.2626	38693.1
rs6925404	6	50905650	c	g	0.825	-0.069	0.0099	4.062e-12	------+--++------++-------+-	0.3112	39617.9
rs478788	1	177887018	t	c	0.7805	-0.0632	0.0091	4.122e-12	------------+---------+-----	0.1509	39618
rs7953534	12	50197880	a	g	0.3135	0.0583	0.0084	4.138e-12	++++++-+++++-++???++++-+++++	0.08858	37235
rs11611070	12	50199474	t	c	0.688	-0.0575	0.0083	4.492e-12	------+-----+---?+----+-----	0.09859	38160.1
rs77891659	6	50893652	a	g	0.1738	0.0699	0.0101	4.628e-12	++++++-++--++++?+?-+++++++-+	0.3099	38693
rs73114127	12	50205502	a	g	0.6856	-0.0575	0.0083	4.753e-12	------+-----+---?-----+-----	0.1297	38160
rs145101485	6	50886236	a	g	0.1756	0.0688	0.01	4.954e-12	++++++-++--++++++--+++++++-+	0.3302	39618
rs12529728	6	50896630	a	g	0.8259	-0.0696	0.0101	4.961e-12	------+--++----?-?+-------+-	0.2921	38692.9
rs734597	6	50836279	a	g	0.1745	0.0688	0.01	4.969e-12	++++++-++--++++++--+++++++-+	0.3256	39618
rs12524834	6	50893443	t	c	0.1741	0.0696	0.0101	5.045e-12	++++++-++--++++?+?-+++++++-+	0.2938	38693
rs16880854	6	50904881	a	g	0.1742	0.0695	0.0101	5.168e-12	++++++-++--++++?+?-+++++++-+	0.299	38692.9
rs62407801	6	50910282	t	g	0.8258	-0.0696	0.0101	5.227e-12	------+--++----?-?+-------+-	0.3009	38693
rs4715213	6	50911091	t	c	0.1742	0.0696	0.0101	5.266e-12	++++++-++--++++?+?-+++++++-+	0.3011	38693
rs72887147	6	50914348	t	c	0.1741	0.0697	0.0101	5.27e-12	++++++-++--++++?+?++++++++-+	0.3077	38693
rs3845345	1	75002667	t	g	0.4215	0.053	0.0077	5.362e-12	++++++--+--++++?+?++++++++-+	0.5122	38799
rs4711961	6	50833084	a	g	0.1745	0.0687	0.01	5.529e-12	++++++-++--++++++--+++++++-+	0.3256	39618
rs62407770	6	50873201	a	g	0.826	-0.0694	0.0101	5.752e-12	------+--++----?-?+-------+-	0.324	38692.9
rs62405443	6	50864335	a	g	0.826	-0.0694	0.0101	5.871e-12	------+--++----?-?+-------+-	0.3235	38692.9
rs943005	6	50865820	t	c	0.1744	0.0683	0.0099	5.877e-12	++++++-++--++++?+?-+++++++-+	0.3037	38799
rs62407804	6	50940677	a	g	0.175	0.07	0.0102	5.986e-12	++++++-++--++++++-++++++++-+	0.2781	39617.9
rs2207139	6	50845490	a	g	0.8264	-0.0695	0.0101	6.158e-12	------+--++----?-?+-------+-	0.3003	38692.9
rs987237	6	50803050	a	g	0.8148	-0.0684	0.01	6.462e-12	-?-??-+--+?-?----++-------+-	0.543	37069
rs62405437	6	50813729	t	c	0.815	-0.0679	0.0099	6.75e-12	----+-+--++----?-?+-------+-	0.5757	38692.9
rs10890130	1	75004875	t	g	0.4205	0.0527	0.0077	6.97e-12	++++++--+--++++?+?++++++++-+	0.5159	38798
rs62405439	6	50847486	a	c	0.1738	0.0692	0.0101	7.172e-12	++++++-++--++++?+?-+++++++-+	0.3295	38693
rs492393	2	25315511	a	g	0.4163	-0.0551	0.0081	7.475e-12	------------+---?----+------	0.7486	38159.9
rs1470909	12	50183966	t	c	0.5886	-0.0546	0.008	7.698e-12	-+----------+--???+---------	0.6214	37235
rs2954129	12	50183361	t	c	0.5884	-0.0545	0.008	7.999e-12	-+----------+--???+---------	0.6286	37235
rs62407775	6	50885581	a	g	0.84	-0.0732	0.0107	8.227e-12	----+-+--++-?----++-------+-	0.1394	38562
rs2603107	12	50183874	t	g	0.5884	-0.0545	0.008	8.471e-12	-+----------+--???+---------	0.6268	37235
rs10783320	12	50179928	t	c	0.5789	-0.0539	0.0079	8.669e-12	-+----------+---?-+---------	0.6971	38160
rs73114136	12	50211406	t	c	0.3118	0.0567	0.0083	9.539e-12	++++++-+++++-+++?+++++-+++++	0.08389	38160
rs7977000	12	50209530	c	g	0.6869	-0.0566	0.0083	9.706e-12	------+-----+---?-----+-----	0.1121	38159.9
rs73114137	12	50211574	a	c	0.3131	0.0566	0.0083	9.823e-12	++++++-+++++-+++?+++++-+++++	0.1122	38160
rs11649091	16	53845169	t	g	0.5658	-0.054	0.0079	1.035e-11	-+--+-+++-+---+-?+++--------	0.001966	38159.9
rs113468108	12	50213076	t	c	0.312	0.0566	0.0083	1.036e-11	++++++-+++++-+++?+++++-+++++	0.08375	38160
rs7978693	12	50197508	a	g	0.3124	0.0575	0.0085	1.041e-11	++++++-+++++-++???++++++++++	0.08827	37235
rs2797084	13	54071824	t	c	0.8549	-0.0744	0.0109	1.045e-11	--------------+-------------	0.2014	39618
rs11612227	12	50210364	t	c	0.3118	0.0565	0.0083	1.097e-11	++++++-+++++-+++?+++++-+++++	0.08137	38160
rs9568863	13	54082529	a	g	0.8598	-0.0749	0.011	1.137e-11	--------------+-------------	0.1054	39618
rs10172886	2	25111680	t	c	0.4677	-0.055	0.0081	1.138e-11	------++----+---?--+----+---	0.3043	38160
rs12142020	1	75000011	a	t	0.5797	-0.0535	0.0079	1.146e-11	------++-++----?-?---?--?-+-	0.568	37743
rs9568861	13	54079446	t	c	0.141	0.0748	0.011	1.149e-11	++++++++++++++-+++++++++++++	0.1383	39618.1
rs2027542	13	54074825	t	g	0.8557	-0.0742	0.0109	1.197e-11	--------------+-------------	0.1967	39618.1
rs112405055	12	50182494	t	c	0.321	0.0564	0.0083	1.332e-11	++++++-+++++-+++?-+++-0+++++	0.2096	38160
rs9568859	13	54076184	a	g	0.8589	-0.0746	0.011	1.367e-11	--------------+-------------	0.1519	39618
rs2720301	12	50180450	t	c	0.6781	-0.0562	0.0083	1.437e-11	------+-----+---?+---+------	0.2243	38160
rs1514176	1	74991596	a	g	0.5624	-0.0521	0.0077	1.44e-11	------+---+----?-?--------+-	0.8636	38693
rs10493544	1	74983835	t	c	0.4575	0.0521	0.0077	1.492e-11	+-++++-+++-++++???++++++++-+	0.9116	37338
rs516636	1	177855517	a	c	0.1969	0.0661	0.0098	1.572e-11	++++++++++++-?+?+?++++-+++-+	0.2641	37118
rs12429545	13	54102206	a	g	0.1337	0.0771	0.0114	1.579e-11	+?+??+++-+?+?+-+++++++++++++	0.1997	37066
rs1514177	1	74991402	c	g	0.4367	0.052	0.0077	1.6e-11	++++++-+++-++++?+?++++++++-+	0.862	38693
rs4883723	13	54084032	a	g	0.1436	0.0724	0.0108	1.919e-11	++++++++++++++-+++++++++++++	0.1572	39718
rs10875972	12	50210535	a	g	0.336	0.0547	0.0082	2.159e-11	++++++-+++++-+++?+-+++-+++++	0.1686	38160
rs6904450	6	50921602	a	t	0.8203	-0.0671	0.01	2.217e-11	------+--++----?-?+-------+-	0.4398	38693
rs4075681	12	50214637	t	c	0.3137	0.0554	0.0083	2.631e-11	++++++-+++++-+++?++++--+++++	0.07033	38160
rs897054	12	50213254	t	c	0.593	0.0525	0.0079	2.718e-11	+-++++++++-+-+++?+++++++++-+	0.4884	38160
rs2094510	1	177843479	t	c	0.1973	0.0637	0.0096	2.774e-11	+-+-++++++++-+++++++++-+++-+	0.1887	39618
rs2720296	12	50169070	a	g	0.4223	0.0541	0.0081	2.799e-11	+-++++++++-+-++???-+++++++++	0.8105	37235
rs4488285	12	50212396	a	t	0.3587	0.0525	0.0079	3.074e-11	+-++++-+++++-+++++-+++++++++	0.2868	39618
rs11615911	12	50212920	t	c	0.6411	-0.0525	0.0079	3.093e-11	-+----+-----+-----+---+-----	0.286	39618
rs6736052	2	25153918	a	g	0.2165	0.0626	0.0094	3.099e-11	+++++++---++-+++?+++++-+-+++	0.6635	38160
rs4715211	6	50900400	a	g	0.1676	0.0682	0.0103	3.19e-11	++++++-++--++++++--+++++++-+	0.2243	39618
rs7566023	2	25151872	a	g	0.7832	-0.0628	0.0095	3.268e-11	-------+++--+---?-----+-+---	0.6383	38160
rs28562191	16	53799303	t	c	0.3803	0.0548	0.0083	3.315e-11	++++-+---+-+-+-+?+++++++++++	0.005659	38160
rs4558547	2	25154587	a	g	0.783	-0.0625	0.0094	3.333e-11	-------+++--+---?-----+-+---	0.654	38159.9
rs59766494	12	50206977	t	c	0.6412	-0.0522	0.0079	3.475e-11	-+----+-----+-----+---+-----	0.2787	39617.9
rs2867129	2	618851	c	g	0.3551	-0.0526	0.0079	3.476e-11	-+----------+-------+?--?-+-	0.6031	38668
rs10875970	12	50207360	a	g	0.6419	-0.0523	0.0079	3.51e-11	-+----+-----+-----+---------	0.2875	39618
rs2867130	2	618802	t	c	0.3548	-0.052	0.0078	3.558e-11	-+----------+-------++----+-	0.6655	39618
rs62405438	6	50815314	a	t	0.1903	0.0648	0.0098	3.595e-11	++++-+-++--++++?+?-+++++++-+	0.5404	38693
rs1514175	1	74991644	a	g	0.438	0.0517	0.0078	3.829e-11	+?+??+-+++?+?+++++++++++++-+	0.8758	37067
rs4715210	6	50897251	t	c	0.175	0.0661	0.01	4.287e-11	++++++-++--++++?+?-++?++?+-+	0.3652	37850
rs1040070	1	74977870	c	g	0.5427	-0.0525	0.008	4.294e-11	-+----+---+----???---?--?-+-	0.9044	36285
rs72892910	6	50816887	t	g	0.1837	0.0665	0.0101	4.307e-11	++++-+-++-+++++?+?-++?++?+-+	0.7158	37743
rs112665992	12	50196281	t	c	0.2987	0.0564	0.0086	4.398e-11	++++++-+++++-+++?-+++--+++++	0.04611	38160.1
rs73114141	12	50213813	a	g	0.3126	0.056	0.0085	4.543e-11	++++++-+++++-++???+++?-+?+++	0.07672	36285
rs2603105	12	50188434	a	t	0.333	0.0542	0.0082	4.543e-11	++++++-+++++-+++?-+++--+++++	0.1747	38160
rs10188118	2	653623	c	g	0.6916	0.0552	0.0084	4.791e-11	++++-++++++++++?+?+---++++++	0.6408	38693.1
rs751675	12	50202420	t	c	0.3311	0.0538	0.0082	4.9e-11	+-++-+-+++++-++?+?++++++++++	0.2227	38692.9
rs2603112	12	50199949	a	g	0.6411	-0.0515	0.0079	5.23e-11	-+----+-----+--?-?+---------	0.4085	38800
rs72887130	6	50902701	a	t	0.8253	-0.0668	0.0102	5.251e-11	------+--++----?-?+--?--?-+-	0.3914	37742.9
rs1075847	6	50836776	a	t	0.825	-0.0661	0.0101	5.283e-11	------+--++------++--?--?-+-	0.4276	38667.9
rs4854268	2	617048	a	t	0.6447	0.0515	0.0078	5.309e-11	+-++++++++++-+++++++--++++-+	0.6522	39618
rs16880869	6	50908992	t	c	0.8253	-0.0668	0.0102	5.375e-11	------+--++----?-?+--?--?-+-	0.3881	37743
rs62405422	6	50796905	t	c	0.8136	-0.0653	0.01	5.673e-11	----+-+--++----?-?+--?--?-+-	0.7407	37742.9
rs1077499	12	50195277	a	t	0.6021	-0.0524	0.008	5.782e-11	------+-----+--???+--+--+---	0.1613	37235
rs59989839	2	25159533	t	c	0.3143	0.0549	0.0084	6.082e-11	+++++++-+-++-+++?+++---+-+++	0.1385	38160
rs6738297	2	25159372	a	g	0.3143	0.0549	0.0084	6.154e-11	+++++++-+-++-+++?+++---+-+++	0.1242	38160.1
rs10875976	12	50226467	a	g	0.4734	0.0506	0.0077	6.251e-11	++++++++++++-+-+?+++++++++-+	0.2896	38160
rs7953539	12	50227988	a	g	0.473	0.0505	0.0077	6.494e-11	++++++++++++-+-+?+++++++++-+	0.3021	38160
rs66924167	12	50205694	c	g	0.3602	0.052	0.008	6.813e-11	+-++++-+++++-++?+?-+++++++++	0.2778	38693
rs4715207	6	50809278	t	c	0.1861	0.0651	0.01	6.94e-11	++++-+-++--++++?+?-++?++?+-+	0.7506	37743
rs2720287	12	50201448	t	c	0.6424	-0.0519	0.008	7.191e-11	-+----+-----+--?-?+---------	0.335	38693.1
rs11169167	12	50216801	t	c	0.4146	-0.0514	0.0079	7.628e-11	-+----------+--???--------+-	0.4246	37235
rs1031476	12	50218433	a	g	0.4083	-0.0516	0.0079	8.032e-11	-+--------+-+--???--------+-	0.4058	37234.9
rs66721590	12	50205712	a	g	0.3586	0.0517	0.008	8.412e-11	+-++++-+++++-++?+?-+++-+++++	0.2602	38693
rs585944	1	177882786	t	c	0.2181	0.0598	0.0092	8.54e-11	+-++++++++++-++?+?++++-+++++	0.3321	38693
rs7313563	12	50204337	a	c	0.3584	0.0517	0.008	8.838e-11	+-++++-+++++-++?+?-+++++++++	0.2942	38693
rs9568856	13	54064981	a	g	0.1365	0.0734	0.0113	9.266e-11	++++++++++++++-+++++++++++++	0.2432	39618
rs6749646	2	25193998	a	t	0.7996	-0.064	0.0099	9.782e-11	-+-+--+---+-+---?-----------	0.8078	38160
rs2867133	2	607107	t	c	0.3518	-0.0506	0.0078	9.83e-11	-+----------+--?-?--++------	0.5544	38796
rs28445639	2	25182488	t	c	0.1967	0.0642	0.01	1.148e-10	+++-++-+++-+-+++?+++++++++++	0.6738	38160
rs11169170	12	50223013	t	c	0.4714	0.0504	0.0078	1.192e-10	++++++++++++-+-???++++++++-+	0.2168	37235
rs60062868	12	50206919	a	g	0.6429	-0.0513	0.008	1.234e-10	-+----+-----+--?-?+---+-----	0.2538	38693
rs1975732	12	50257946	t	c	0.6568	0.051	0.0079	1.336e-10	++++++++++++++++?--+++++++-+	0.234	38266
rs7199285	16	19980931	t	c	0.1854	-0.0647	0.0101	1.34e-10	---+---+----+--?-?---?--?---	0.9944	37743
rs114285994	16	19935763	a	g	0.129	-0.0737	0.0115	1.409e-10	-------+----+--------?--?---	0.9985	38668
rs2720302	12	50179021	a	g	0.3383	0.0527	0.0082	1.458e-10	++++-+-+++++-+++?++++-++++++	0.2281	38160
rs1336780	1	177864136	a	t	0.7456	-0.0554	0.0087	1.62e-10	----+----------+--+-----+-+-	0.8625	39618
rs11611168	12	50203166	t	c	0.3476	0.0512	0.008	1.703e-10	+-++++-+++-+-++?+?-+++-+++++	0.169	38692.9
rs2867126	2	618973	a	t	0.6442	0.0506	0.0079	1.765e-10	+-++++++++++-++?+?++--++++-+	0.7641	38692.9
rs13388020	2	25196266	c	g	0.1968	0.0634	0.01	1.825e-10	+-++++-+++-+-+++?+++++++++++	0.6831	38160.1
rs13401333	2	25373031	t	c	0.6213	0.0497	0.0078	1.892e-10	++++++++++++-+++--++++++++++	0.9566	39617.9
rs13428823	2	25373298	a	g	0.6195	0.0496	0.0078	1.926e-10	++++++++++++-+++--+++?++?+++	0.9295	38773
rs571312	18	57839769	a	c	0.2266	0.059	0.0093	1.996e-10	+?+??++-++?+?++-++-+-+++++++	0.0941	37068
rs56133711	11	27723334	a	g	0.2424	0.0566	0.0089	2.001e-10	+-+-++-+++++++++?+++++++++++	0.6155	38160
rs76286777	2	25195577	t	c	0.8026	-0.0632	0.0099	2.048e-10	-+----+---+-+---?-----------	0.7114	38159.9
rs76629501	2	25233822	c	g	0.8025	-0.0634	0.01	2.1e-10	----------+-+---?-----------	0.7981	38160.1
rs2603116	12	50179630	t	c	0.6408	-0.0514	0.0081	2.165e-10	------+-----+---?-----------	0.3069	38160
rs4898534	12	50231025	a	g	0.5268	-0.0497	0.0078	2.201e-10	------+-----+-+???--------+-	0.239	37235
rs2206277	6	50798526	t	c	0.186	0.0659	0.0104	2.324e-10	+?+??+-++-?+?++?+?-++?++?+-+	0.8548	35088
rs9805137	12	50259062	a	t	0.672	0.0515	0.0081	2.436e-10	++++-+++++++++++?+-+++++++-+	0.2836	38160
rs10783326	12	50259144	a	g	0.6715	0.0515	0.0081	2.442e-10	++++-+++++++++++?+-+++++++-+	0.2811	38160
rs78285703	2	558281	a	g	0.9267	0.0936	0.0148	2.468e-10	++++++++++-+++++++++++++++++	0.3009	39618
rs11500197	11	27707409	a	g	0.2428	0.0553	0.0088	2.697e-10	+-+-++-+++++++++++++++++++++	0.5767	39618
rs75421120	2	25200085	a	g	0.1945	0.0631	0.01	2.718e-10	+-++++-+++-+-+++?+++++++++++	0.6187	38160
rs4854332	2	618027	t	c	0.3553	-0.05	0.0079	2.76e-10	-+----------+--?-?--++----+-	0.7767	38693
rs6656785	1	75005776	a	g	0.6057	-0.0496	0.0079	2.766e-10	------++-++----?-?--------+-	0.6581	38693
rs7973894	12	50233256	a	g	0.4741	0.0495	0.0078	2.778e-10	++++++-+++++-+-???++++++++-+	0.2301	37235
rs7565774	2	605695	a	c	0.353	-0.051	0.0081	2.8e-10	-+----------+--???--++------	0.5654	37235
rs1866146	2	25380573	a	g	0.6284	0.0491	0.0078	2.871e-10	++++++++++-+-+++-+++++++++++	0.8934	39725
rs56059808	2	554643	a	g	0.0742	-0.0921	0.0146	2.941e-10	----------+-----------------	0.3472	39618
rs112991346	16	19967668	t	c	0.8621	0.0694	0.011	2.971e-10	+++-+++-++++-+++++++++++-+++	0.9373	39617.9
rs59979714	2	25283747	t	c	0.1989	0.0627	0.01	2.975e-10	++++++++++-+-+++?+++++++++++	0.8819	38160
rs3795955	2	25375105	t	c	0.3551	-0.05	0.0079	3.01e-10	----------+-+---------------	0.9897	39618
rs11169162	12	50207126	t	c	0.6407	-0.0507	0.008	3.014e-10	-+----+-----+--?-?---?+-?---	0.1776	37743
rs2271687	12	50259515	c	g	0.6694	0.0513	0.0081	3.038e-10	++++-+++++++++++?+-+++++++-+	0.2876	38160
rs2271688	12	50259529	a	c	0.3306	-0.0512	0.0081	3.095e-10	----+-----------?-+-------+-	0.2885	38160
rs11169163	12	50208343	a	g	0.6633	-0.0518	0.0082	3.309e-10	------+-----+--???----+-----	0.1521	37235.1
rs1865687	2	25112885	a	g	0.3506	0.049	0.0078	3.372e-10	++++-+++-+++-++++-+-++++-+++	0.1593	39724
rs3741557	12	50258325	t	g	0.3303	-0.051	0.0081	3.407e-10	----+-----------?-+-------+-	0.2871	38160
rs4318419	2	613154	t	c	0.6456	0.0498	0.0079	3.452e-10	+-++++++++++-++?+?++--++++-+	0.7739	38693
rs4898532	12	50223579	t	c	0.5425	-0.0494	0.0079	3.515e-10	------+-----+-+???--------+-	0.1663	37235
rs3845344	1	75001480	t	c	0.3955	0.0481	0.0077	3.588e-10	++++++--+--+++++++++++++++-+	0.7113	39724
rs13414109	2	553986	a	c	0.9255	0.0912	0.0146	3.639e-10	++++++++++-+++++++++++++++++	0.3512	39618
rs56386733	2	25278829	c	g	0.1982	0.0624	0.01	3.722e-10	++++++++++-+-+++?+++++++++++	0.8882	38160
rs58378369	2	554496	a	g	0.9255	0.0912	0.0146	3.725e-10	++++++++++-+++++++++++++++++	0.349	39618
rs3741558	12	50258205	a	g	0.6691	0.0509	0.0081	3.782e-10	++++-+++++++++++?+-+++++++-+	0.2928	38160
rs7310206	12	50251109	a	g	0.3478	-0.0504	0.008	3.788e-10	--+-+-----------?++-------+-	0.2261	38160
rs6716401	2	555107	a	g	0.0743	-0.0912	0.0146	3.808e-10	----------+-----------------	0.3424	39618.1
rs4332953	2	553113	a	g	0.0745	-0.0912	0.0146	3.814e-10	----------+-----------------	0.361	39618
rs56325302	2	555814	t	c	0.9255	0.0912	0.0146	3.82e-10	++++++++++-+++++++++++++++++	0.3464	39618.1
rs6670873	1	177841685	t	c	0.2011	0.0603	0.0096	3.826e-10	+-+-++++++++-++?+?++++-+-+-+	0.1565	38693
rs10186386	2	555510	a	g	0.0745	-0.0911	0.0146	3.83e-10	----------+-----------------	0.3466	39618
rs56046241	2	557624	a	g	0.0744	-0.0911	0.0146	3.923e-10	----------+-----------------	0.3439	39618
rs60942644	2	556653	t	c	0.0745	-0.0911	0.0146	3.957e-10	----------+-----------------	0.3447	39618
rs73146390	2	556792	t	c	0.9255	0.0911	0.0146	3.957e-10	++++++++++-+++++++++++++++++	0.3443	39618
rs56358124	2	556664	t	c	0.0745	-0.0911	0.0146	3.959e-10	----------+-----------------	0.3448	39618
rs56355782	2	556824	t	c	0.9255	0.0911	0.0146	3.961e-10	++++++++++-+++++++++++++++++	0.3443	39618
rs73910241	2	556797	t	c	0.0745	-0.0911	0.0146	3.961e-10	----------+-----------------	0.3444	39618
rs73146386	2	556006	a	g	0.9255	0.0911	0.0146	3.972e-10	++++++++++-+++++++++++++++++	0.3451	39618.1
rs73146388	2	556179	a	g	0.0745	-0.0911	0.0146	3.973e-10	----------+-----------------	0.345	39618
rs10206492	2	557073	a	g	0.9256	0.0911	0.0146	3.98e-10	++++++++++-+++++++++++++++++	0.3437	39618
rs10206496	2	557099	a	g	0.9256	0.091	0.0146	3.984e-10	++++++++++-+++++++++++++++++	0.3438	39618
rs10209543	2	557205	t	c	0.9256	0.091	0.0146	3.986e-10	++++++++++-+++++++++++++++++	0.3439	39617.9
rs10201828	2	557069	a	c	0.0744	-0.091	0.0146	3.988e-10	----------+-----------------	0.3439	39618
rs10209658	2	557322	t	c	0.9255	0.091	0.0146	3.994e-10	++++++++++-+++++++++++++++++	0.3434	39618
rs17042013	2	556088	t	c	0.9255	0.091	0.0146	4.008e-10	++++++++++-+++++++++++++++++	0.3444	39618
rs4332952	2	552959	c	g	0.0745	-0.091	0.0146	4.037e-10	----------+-----------------	0.3598	39618
rs3923528	2	552833	a	g	0.9255	0.091	0.0146	4.08e-10	++++++++++-+++++++++++++++++	0.3596	39618
rs2903495	2	613290	t	g	0.355	-0.0495	0.0079	4.104e-10	-+----------+--?-?--++----+-	0.7696	38693
rs1573989	2	555394	t	c	0.0745	-0.091	0.0146	4.116e-10	----------+-----------------	0.345	39618
rs4854269	2	617190	c	g	0.3715	-0.0492	0.0079	4.164e-10	-+----------+-------++----+-	0.7298	39618
rs6548236	2	615218	t	c	0.6447	0.0495	0.0079	4.165e-10	+-++++++++++-++?+?++--++++-+	0.7648	38693
rs7586879	2	25116977	t	c	0.3508	0.0509	0.0082	4.168e-10	+++??+++-+?+?++++-+-++++-+++	0.517	37506
rs67723963	12	50258542	t	g	0.6626	0.0509	0.0082	4.168e-10	++++++++++++++++?+-+++++++-+	0.2575	38160
rs10783323	12	50254148	t	c	0.6705	0.0507	0.0081	4.227e-10	++++-+++++++++++?+-+++++++-+	0.2932	38160
rs1563168	12	50257547	c	g	0.6668	0.0509	0.0082	4.291e-10	++++-+++++++++++?+-+++++++-+	0.326	38159.9
rs13411762	2	554109	t	c	0.0745	-0.0898	0.0144	4.318e-10	----------+-----------------	0.3352	39718
rs2966403	2	613571	t	c	0.3556	-0.0494	0.0079	4.481e-10	-+----------+--?-?--+0----+-	0.7832	38693
rs11642841	16	53845487	a	c	0.394	0.0511	0.0082	4.68e-10	+-++-----+-+++-+?-+-++++++++	0.001021	38160
rs7563834	2	25366080	a	g	0.6054	0.0487	0.0078	4.747e-10	++++++++++++-+++-+++++++++++	0.8	39618
rs61888800	11	27722278	t	g	0.2421	0.0561	0.009	4.754e-10	+-+-++-++++++++???++++++++++	0.5102	37235
rs7954572	12	50252915	a	g	0.6709	0.0506	0.0081	4.831e-10	++++-+++++++++++?+-+++++++-+	0.2895	38160
rs7969178	12	50252802	t	c	0.3291	-0.0505	0.0081	4.888e-10	----+-----------?-+-------+-	0.2897	38160
rs4898535	12	50231057	t	g	0.5367	-0.0493	0.0079	4.958e-10	------+-----+-+???----------	0.2919	37235
rs148965598	16	19975731	a	g	0.8735	0.0716	0.0115	4.985e-10	+++-+++-++++-+++++++++++-+++	0.9832	39618
rs8057044	16	53812614	a	g	0.4704	0.0477	0.0077	5.09e-10	++++-+---+++-+-?+?+++++-++++	0.003097	38693
rs2903493	2	618966	t	c	0.6432	0.0505	0.0081	5.129e-10	+-++++++++++-++?++++-??+?+-+	0.6318	36661
rs73135433	2	558650	c	g	0.9254	0.0905	0.0146	5.174e-10	++++++++++-+++++++++++++++++	0.3275	39618
rs59155397	2	556229	t	c	0.0744	-0.0914	0.0147	5.214e-10	----------+----------?--?---	0.2614	38668
rs10192669	2	557123	t	g	0.0744	-0.0914	0.0147	5.265e-10	----------+----------?--?---	0.2606	38668
rs7295882	12	50251066	t	c	0.3292	-0.0504	0.0081	5.288e-10	----+-----------?-+-------+-	0.2976	38160
rs7306374	12	50250389	t	c	0.6708	0.0503	0.0081	5.638e-10	++++-+++++++++++?+-+++++++-+	0.2914	38160
rs7309919	12	50250815	t	c	0.6708	0.0503	0.0081	5.711e-10	++++-+++++++++++?+-+++++++-+	0.2903	38160
rs2966402	2	613782	t	c	0.3547	-0.0485	0.0078	5.716e-10	-+----------+--?-?--++----+-	0.7668	38798
rs11683212	2	25120196	t	c	0.6511	-0.0491	0.0079	5.754e-10	----+---+---+----+-+----+---	0.2029	39618
rs11688665	2	25121168	t	g	0.3515	0.0496	0.008	5.776e-10	++++-+++-+++-++++-+-+?++?+++	0.1633	38668
rs17309874	11	27667236	a	g	0.2501	0.0547	0.0088	5.847e-10	+-++++-++++++++?+?-++++++-++	0.5985	38693.1
rs73135425	2	558323	t	c	0.0748	-0.0901	0.0146	5.928e-10	----------+-----------------	0.3322	39618.1
rs77657999	2	558286	t	c	0.9252	0.0901	0.0146	5.978e-10	++++++++++-+++++++++++++++++	0.332	39618.1
rs6740501	2	558749	t	c	0.0749	-0.0901	0.0146	5.988e-10	----------+-----------------	0.3321	39618.1
rs6732686	2	559197	a	g	0.0749	-0.0901	0.0146	6.024e-10	----------+-----------------	0.3315	39617.9
rs59902158	2	25253528	a	g	0.1965	0.0619	0.01	6.084e-10	+-++++++++-+-+++?+++++++++++	0.8293	38160
rs4898512	12	50246701	a	g	0.6671	0.0502	0.0081	6.274e-10	++++-+++++++++++?+-+++++++-+	0.3044	38160
rs9309308	2	24994570	t	c	0.7668	0.0554	0.009	6.308e-10	++++-++-++-+++--?+++++++++++	0.7214	38267
rs113953597	2	25445286	a	g	0.2161	-0.0597	0.0097	6.322e-10	---------+--+---?-----------	0.8782	38160
rs1869504	12	50241435	a	g	0.6703	0.0501	0.0081	6.39e-10	++++-+++++++++++?+-+++++++-+	0.3784	38159.9
rs6733854	2	554949	t	c	0.927	0.0916	0.0148	6.402e-10	++++++++++-+++++++++++++++++	0.3728	39618
rs2083389	2	24967724	t	c	0.7393	0.0542	0.0088	6.438e-10	+++++++-++-+++-+?+++++++-+++	0.5207	38160
rs12185581	2	25405507	t	c	0.8016	0.0603	0.0098	6.506e-10	++++-++++-++-+++?+++++++++++	0.8895	38160
rs6567160	18	57829135	t	c	0.7754	-0.0561	0.0091	6.608e-10	----+--+--+-++-+--+-+-------	0.1104	39618
rs10747567	12	50251120	t	c	0.3297	-0.0501	0.0081	6.66e-10	----+-----------?-+-------+-	0.2965	38160
rs10207698	2	25117672	t	c	0.3515	0.0494	0.008	6.662e-10	++++-+++-+++-++++-+-+?++?+++	0.1923	38668
rs7578764	2	618002	t	c	0.3557	-0.05	0.0081	6.731e-10	-+----------+-------+??-?-+-	0.7023	37035
rs62500888	8	28061823	a	g	0.5673	0.0472	0.0076	6.91e-10	+++--++-+-+++++++-+-+-++++++	0.8232	39618
rs17737058	2	24991569	c	g	0.7689	0.0562	0.0091	6.98e-10	++++-++-++-+++--?+-+++++++++	0.7337	38160.1
rs6736711	2	25116456	t	c	0.3504	0.0482	0.0078	7.015e-10	++++-+++-+++-++++-+-++++-+++	0.2064	39721
rs4077680	2	25122942	a	g	0.6483	-0.0493	0.008	7.082e-10	----+---+---+----+-+-?--?---	0.1561	38668
rs11685767	2	617394	a	g	0.3587	-0.05	0.0081	7.136e-10	-+----------+-------+??-?-+-	0.6928	37035
rs11643088	16	19969580	t	c	0.1347	-0.0687	0.0112	7.195e-10	-------+----+-----------+---	0.9184	39618
rs3911350	1	75014538	a	g	0.3797	0.0524	0.0085	7.284e-10	++++++--+--++++???++++++++-+	0.8983	37235
rs75707145	11	27739911	t	g	0.2446	0.0562	0.0091	7.299e-10	+-++++-+++++?+++?++++++++-++	0.5039	37104
rs10783321	12	50249603	t	c	0.6706	0.05	0.0081	7.311e-10	++++-+++++++++++?+-+++++++-+	0.3045	38160
rs56159942	2	25242274	a	g	0.1966	0.0616	0.01	7.531e-10	+-++++++++-+-+++?+++++++++++	0.8122	38160.1
rs35033157	2	25118020	t	c	0.648	-0.0492	0.008	7.631e-10	----+---+---+----+-+-?--?---	0.1647	38668
rs35746264	8	28062691	a	g	0.5676	0.047	0.0076	7.677e-10	+++--++-+-+++++++-+-+-++++++	0.8275	39618
rs12313488	12	49705661	a	g	0.7179	-0.053	0.0086	7.687e-10	------++--+-+----+--+---+---	0.3458	39617.9
rs6734834	2	25254735	t	g	0.8043	-0.0618	0.0101	7.794e-10	-+--------+-+---?-----------	0.8314	38159.9
rs6690871	1	74977277	a	g	0.5669	-0.049	0.008	7.821e-10	-+----++-++----???--+-----+-	0.7475	37235
rs7967564	12	50249531	a	g	0.6715	0.0499	0.0081	7.828e-10	++++-+++++++++++?+-+++++++-+	0.2983	38159.9
rs148451076	12	50182884	t	c	0.1338	0.0913	0.0149	7.837e-10	+++++++++?-+?+?+?--+++++++++	0.6509	35018
rs6265	11	27679916	t	c	0.1868	-0.0599	0.0097	7.867e-10	---??----+?-?+-----++-------	0.339	37612
rs6729395	2	558802	a	g	0.0748	-0.0904	0.0147	7.912e-10	----------+----------?--?---	0.2505	38668
rs6749825	2	558860	a	t	0.0748	-0.0904	0.0147	7.916e-10	----------+----------?--?---	0.2504	38667.9
rs11641335	16	19967822	t	c	0.1363	-0.0679	0.0111	8.158e-10	---+---+----+----+------+---	0.9243	39618
rs7821358	8	28060690	a	g	0.5677	0.047	0.0076	8.185e-10	+++--++-+-+++++++-+-+-++++++	0.7859	39617.9
rs35038967	11	27703480	a	t	0.2044	-0.0579	0.0094	8.207e-10	-------++++-++-?-?-++-------	0.3024	38692.9
rs8046312	16	19979334	a	c	0.8119	0.0592	0.0096	8.207e-10	+++-+++-++++-++-+++++-++-+++	0.9832	39720
rs16917237	11	27702383	t	g	0.2042	-0.0578	0.0094	8.425e-10	-------++++-++-?-?-++-------	0.3109	38693
rs10747568	12	50252470	a	g	0.3274	-0.0499	0.0081	8.465e-10	--+-+-----------?-+-------+-	0.2886	38160
rs138385919	11	27690566	t	g	0.7562	-0.0534	0.0087	8.642e-10	-+-+--+---------------------	0.6551	39618
rs11136036	8	28061310	t	c	0.4329	-0.0469	0.0076	8.643e-10	---++--+-+-------+-+-+------	0.8096	39618.1
rs8054082	16	19975418	t	c	0.1362	-0.0679	0.0111	8.644e-10	---+---+----+-----------+---	0.9336	39618
rs8054079	16	19975407	t	c	0.1362	-0.0679	0.0111	8.766e-10	---+---+----+-----------+---	0.9333	39618
rs4898513	12	50246773	a	c	0.6686	0.0499	0.0081	8.819e-10	++++-+++++++++++?+-+++++++-+	0.3028	38160
rs17782313	18	57851097	t	c	0.7722	-0.058	0.0095	9.326e-10	-?-??--+--?-?+-?-?+-+-------	0.1006	36038
rs79682290	2	25041566	a	g	0.2612	-0.0536	0.0088	9.58e-10	----+--+--+---+-?-+-----+---	0.8053	38160
rs13002549	2	25405527	t	c	0.7994	0.0592	0.0097	9.685e-10	++++-++++-++-+++?+++++++++++	0.9123	38160.1
rs4391887	12	50225250	a	g	0.3593	-0.049	0.008	9.777e-10	-+--------------?-+-------+-	0.6519	38160
rs10875984	12	50248043	a	t	0.6667	0.0496	0.0081	9.841e-10	++++-+++++++++++?+-+++++++-+	0.2441	38159.9
rs150469214	16	19929759	t	c	0.1271	-0.0696	0.0114	9.92e-10	---+---+----+-----------+---	0.943	39617.9
rs9938120	16	19977733	t	c	0.1371	-0.0677	0.0111	9.975e-10	---+---+----+-----------+---	0.9485	39618
rs17041285	2	614031	a	g	0.6442	0.0494	0.0081	1.003e-09	+-++++++++++-+++++++-??+?+-+	0.6985	37035
rs7137210	12	50250443	t	g	0.3311	-0.0496	0.0081	1.014e-09	----+-----------?-+-------+-	0.2419	38160
rs4854331	2	617621	a	g	0.6421	0.0485	0.0079	1.028e-09	+-++++++++++-++?+?++--++++-+	0.7885	38693
rs2206271	6	50786008	a	t	0.3042	0.051	0.0084	1.042e-09	++++++-++-+++++?+?--++++++++	0.4839	38693.1
rs2744475	6	50784880	c	g	0.6976	-0.051	0.0084	1.081e-09	------+--+-----?-?++--------	0.5528	38693
rs62140608	2	25070992	t	c	0.7374	0.0523	0.0086	1.085e-09	+++++++--+-++++-++-+++++++++	0.7515	39618
rs8059504	16	19975981	a	g	0.1362	-0.0675	0.0111	1.127e-09	---+---+----+-----------+---	0.9502	39618
rs17411738	8	28060572	t	g	0.5678	0.0466	0.0076	1.128e-09	+++--++-+-+++++++-+-+-++++++	0.7995	39617.9
rs13253111	8	28061974	a	g	0.5701	0.0465	0.0076	1.14e-09	+++--++-+-+++++++-+-+?++?+++	0.791	38774
rs73146394	2	558048	t	g	0.935	0.0973	0.016	1.152e-09	++++++++++-+++++++-+++++++-+	0.3626	39618
rs4290311	12	50229149	a	g	0.6401	0.0488	0.008	1.182e-09	+-++++++++++++++?+-+++++++-+	0.6346	38160
rs10871777	18	57851763	a	g	0.7717	-0.0568	0.0094	1.227e-09	-?-??--+--?-?--+--+-+?--?---	0.0566	36119
rs4898537	12	50243342	c	g	0.3307	-0.0498	0.0082	1.227e-09	----+----------???+-------+-	0.2892	37235
rs1044677	12	50260825	t	c	0.3195	-0.0512	0.0084	1.235e-09	---------------???+-----+-+-	0.3926	37235
rs7302465	12	50243795	a	g	0.3307	-0.0498	0.0082	1.255e-09	----+----------???+-------+-	0.2808	37235
rs4898539	12	50251910	t	g	0.6691	0.0498	0.0082	1.257e-09	++++-++++++++++???-+++++++-+	0.2277	37235
rs7603153	2	25116966	t	c	0.6488	-0.048	0.0079	1.26e-09	----+---+---+----+-+----+---	0.2103	39618
rs6545808	2	25124388	a	c	0.3514	0.048	0.0079	1.274e-09	++++-+++-+++-++++-+-++++-+++	0.1701	39618
rs9773606	8	28068058	t	c	0.431	-0.0467	0.0077	1.274e-09	---++----+-------+-+-+------	0.7999	39618
rs11030088	11	27646247	a	g	0.2329	0.055	0.0091	1.275e-09	+-+-++-++++++++?+?++++++++++	0.7038	38693
rs34633411	18	57854694	t	c	0.2261	0.0549	0.009	1.282e-09	++++-++-++-+--+-++-+-+++++++	0.1029	39618
rs10175064	2	25117537	t	c	0.6489	-0.048	0.0079	1.3e-09	----+---+---+----+-+----+---	0.2104	39618
rs7608185	2	25115432	c	g	0.3451	0.0484	0.008	1.304e-09	++++-+++++++-++++-+-++++-+++	0.1981	39618
rs1965873	12	50257095	t	c	0.3406	-0.0493	0.0081	1.307e-09	----+-----------?-+-------+-	0.2857	38160
rs10179794	2	25113989	t	c	0.6493	-0.048	0.0079	1.324e-09	----+---+---+----+-+----+---	0.1995	39618
rs6545807	2	25124358	t	c	0.3514	0.048	0.0079	1.327e-09	++++-+++-+++-++++-+-++++-+++	0.1686	39618
rs6545795	2	25116783	t	c	0.351	0.048	0.0079	1.344e-09	++++-+++-+++-++++-+-++++-+++	0.2141	39618
rs148069489	16	19975782	t	c	0.1362	-0.0672	0.0111	1.374e-09	---+---+----+-----------+---	0.9496	39618
rs4077679	2	25122852	t	c	0.6486	-0.0479	0.0079	1.388e-09	----+---+---+----+-+----+---	0.1725	39618
rs17175518	18	57850583	a	c	0.2256	0.0548	0.009	1.389e-09	++++-++-++-+--+-++-+-+++++++	0.1103	39618
rs7590512	2	25406403	t	c	0.196	-0.0593	0.0098	1.504e-09	----+----+--+---?-----------	0.9357	38160
rs4665769	2	25403310	t	c	0.2005	-0.0587	0.0097	1.52e-09	----+----+--+-+-?-----------	0.8893	38160
rs73146396	2	558080	t	g	0.0649	-0.0978	0.0162	1.54e-09	----------+-------+--?--?-+-	0.2676	38668.1
rs55880046	16	19941557	t	g	0.867	0.0668	0.0111	1.56e-09	+++-+++-++++-+++++++++++-+++	0.9414	39618
rs4898517	12	49709427	a	g	0.736	-0.0532	0.0088	1.598e-09	------++--+----+-++-+---+---	0.5681	39617.9
rs72771041	16	19927707	t	g	0.8679	0.067	0.0111	1.62e-09	+++-+++-++++-++++-++++++-+++	0.91	39618
rs58109580	16	19977473	t	g	0.8636	0.0675	0.0112	1.626e-09	+++-+++-++++-++?+?++++++-+++	0.9596	38693
rs2278483	2	25040082	t	c	0.235	-0.0538	0.0089	1.629e-09	-------+--+---++?-+---------	0.8945	38266
rs56791931	16	19977420	t	g	0.1363	-0.0675	0.0112	1.642e-09	---+---+----+--?-?------+---	0.9598	38693
rs12713419	2	25121853	a	g	0.3423	0.0479	0.008	1.679e-09	++++-+++++++-++++-+-++++-+++	0.1867	39618
rs58653754	16	19977601	a	c	0.1363	-0.0674	0.0112	1.733e-09	---+---+----+--?-?------+---	0.9602	38693.1
rs59323025	16	19977617	a	c	0.1363	-0.0674	0.0112	1.742e-09	---+---+----+--?-?------+---	0.9602	38693
rs7945	2	25042622	a	g	0.7686	0.0546	0.0091	1.764e-09	+++++++--+-+++--?+-+++++++++	0.8595	38160
rs72807674	2	25333105	a	c	0.7253	-0.0529	0.0088	1.826e-09	----------+-+--+-------+----	0.778	39618
rs12444979	16	19933600	t	c	0.1339	-0.069	0.0115	1.831e-09	-?-??--+--?-?-----------+---	0.9316	36963
rs13014100	2	25123040	t	c	0.3304	0.0511	0.0085	1.839e-09	++++-+++++++-+++?-+-+?++?+++	0.1175	37210
rs12446554	16	19935073	t	g	0.1329	-0.0665	0.0111	1.885e-09	---+---+----+-----------+---	0.9288	39618
rs1573990	2	555344	a	c	0.9204	0.086	0.0143	1.912e-09	++++++++++-+++++++++++++++++	0.5255	39618
rs12233132	2	25328703	t	c	0.3141	-0.0513	0.0086	1.924e-09	-?-??-----?-?-------+---+---	0.8444	37069
rs6484320	11	27703188	a	t	0.7907	0.0555	0.0093	1.966e-09	+++++++--+-+--+-+-++-+++-+++	0.4843	39618
rs4665287	2	25413309	t	c	0.2035	-0.0565	0.0094	2.049e-09	----+----+--+-0-?-----------	0.8295	38265
rs34926599	6	50880479	t	c	0.2958	0.0497	0.0083	2.071e-09	++++++-++-++++++++--++++++++	0.4368	39618.1
rs12963533	18	57740710	a	g	0.2415	0.0533	0.0089	2.074e-09	+++++++-++-+--+-++++-++++++-	0.04945	39617.9
rs9631062	2	25110084	t	c	0.3245	0.0489	0.0082	2.098e-09	++++-+++++++-+-++-+++?++?+++	0.1855	38668
rs4898511	12	50246482	a	c	0.663	0.0487	0.0081	2.139e-09	++-+-+++++++++++?+-+++++++-+	0.2461	38160
rs11030107	11	27694835	a	g	0.7565	-0.0528	0.0088	2.141e-09	-+-+--+--------?-?----------	0.5798	38693
rs7307673	12	50238204	a	g	0.347	-0.0485	0.0081	2.143e-09	-+--------------?-+-------+-	0.5658	38160
rs8092668	18	57783111	a	g	0.7628	-0.0533	0.0089	2.144e-09	-------+--+-+--+----+------+	0.07203	39618
rs12446632	16	19935389	a	g	0.1328	-0.0655	0.0109	2.159e-09	---+---+----+-----------+---	0.9227	39721
rs11030102	11	27681596	c	g	0.7566	-0.0528	0.0088	2.16e-09	-+-+--+--------?-?----------	0.6025	38693.1
rs6923215	6	50889848	a	g	0.2958	0.0497	0.0083	2.16e-09	++++++-++-++++++++--++++++++	0.428	39618.1
rs10164842	2	25113803	t	c	0.3339	0.0484	0.0081	2.167e-09	++++-+++++++-+-++-+++?++?+++	0.219	38668
rs72771049	16	19933511	t	g	0.1328	-0.0662	0.0111	2.17e-09	---+---+----+-----------+---	0.9264	39618
rs11152213	18	57852948	a	c	0.7727	-0.054	0.009	2.176e-09	----+--+--+-++-+--+-+-------	0.1054	39618.1
rs17799110	2	24996715	a	t	0.2329	-0.0545	0.0091	2.185e-09	----+--+--+---++?-+---------	0.6834	38160
rs72771045	16	19931114	t	c	0.1313	-0.0672	0.0112	2.208e-09	---+---+----+-----------+---	0.8826	39617.9
rs72771047	16	19931360	a	g	0.1302	-0.0673	0.0113	2.212e-09	---+---+----+-----------+---	0.9312	39618
rs7565468	2	25130092	t	c	0.3266	0.0481	0.008	2.225e-09	++++-+++++++-+-++-+++?++?+++	0.2246	38774
rs2384078	2	25294418	c	g	0.1989	0.0603	0.0101	2.296e-09	++++++++++-+-+++?++++?+-?+++	0.9397	37210.1
rs151209987	16	19929619	a	c	0.8709	0.0677	0.0113	2.323e-09	+++-+++-++++-+++++++++++-+++	0.9393	39618
rs62140587	2	25035379	c	g	0.7652	0.0541	0.0091	2.34e-09	+++++++-++-+++--?+-+++++++++	0.8945	38160
rs1344840	2	25070645	a	g	0.2635	-0.0509	0.0085	2.345e-09	-------++-+----+--+--?--?---	0.676	38775
rs2947410	2	614375	a	c	0.6349	0.0489	0.0082	2.353e-09	+-++++++++++-++?+?++-??+?+-+	0.8473	36110.1
rs575908	1	177900098	t	c	0.7036	-0.0485	0.0081	2.359e-09	---+---+--+-+----+----+---+-	0.06396	39718
rs7103411	11	27700125	t	c	0.7908	0.0553	0.0093	2.385e-09	+++++++--+-+--+-+-++-+++-+++	0.5143	39618
rs4923464	11	27683618	t	c	0.2049	-0.0555	0.0093	2.452e-09	-------++++-++-+----+-------	0.3343	39618
rs538656	18	57850422	t	g	0.2274	0.0539	0.009	2.463e-09	++++-++-++-+--+-++-+-+++++++	0.1316	39618
rs6922746	6	50889828	a	t	0.7026	-0.0495	0.0083	2.51e-09	------+--+--------++--------	0.4292	39618
rs36190479	18	57740906	a	c	0.2407	0.0529	0.0089	2.563e-09	+++++++-++-+--+-++++-++++++-	0.04202	39618
rs11169186	12	50251984	a	g	0.4085	-0.05	0.0084	2.654e-09	----------------?-+-------+-	0.4949	38160
rs8092496	18	57747974	a	g	0.2425	0.0528	0.0089	2.671e-09	+++++++-++-+--+-++++-++++++-	0.04184	39618
rs10835211	11	27701365	a	g	0.2399	0.052	0.0087	2.683e-09	+-+-++-++++++++?+?++++++++++	0.5639	38800
rs7198972	16	19942331	a	g	0.8668	0.0664	0.0112	2.694e-09	+++-+++-++++-++?+?++++++-+++	0.9503	38692.9
rs11662368	18	57757978	a	g	0.7657	-0.054	0.0091	2.706e-09	-------+--+-++-+----+------+	0.04907	39618
rs55645784	18	57745302	t	c	0.2403	0.0528	0.0089	2.71e-09	+++++++-++-+--+-++++-++++++-	0.04082	39618
rs150742980	2	25027311	t	c	0.2317	-0.0541	0.0091	2.716e-09	-------++-+---++?-+---------	0.9026	38160
rs12617514	2	25419691	t	c	0.2065	-0.0559	0.0094	2.722e-09	----+----+--+-+-?-----------	0.8222	38265
rs72982930	18	57742493	a	g	0.7596	-0.0528	0.0089	2.728e-09	-------+--+-++-+----+------+	0.04068	39617.9
rs71357686	18	57741114	t	g	0.7596	-0.0528	0.0089	2.731e-09	-------+--+-++-+----+------+	0.04045	39618
rs11152210	18	57740612	a	g	0.24	0.0528	0.0089	2.738e-09	+++++++-++-+--+-++++-++++++-	0.03946	39618.1
rs7190603	16	19928662	t	c	0.8677	0.0666	0.0112	2.761e-09	+++-+++-++++-++?+?++++++-+++	0.9261	38693
rs10875986	12	50251571	t	g	0.6499	0.049	0.0082	2.804e-09	++++-+++++++++++?+-+++++++-+	0.2209	38160
rs72807675	2	25334282	a	c	0.2673	0.0523	0.0088	2.863e-09	++++++++++-+-++-+++++++-++++	0.8543	39618
rs72982934	18	57747215	t	g	0.2402	0.0528	0.0089	2.866e-09	+++++++-++-+--+-++++-++++++-	0.03809	39617.9
rs11892043	2	24990082	a	g	0.717	0.0507	0.0085	2.906e-09	++++-++-++-+++-+?-++++++-+++	0.6133	38160
rs12986610	2	25106265	t	c	0.3274	0.0477	0.008	2.92e-09	++++-+++++++-+-++-+++-++-+++	0.1502	39618
rs11693308	2	24946188	t	c	0.2303	-0.0541	0.0091	2.927e-09	----+--+--+---++?-+---------	0.5631	38160
rs2384091	2	25406118	a	t	0.7956	0.0568	0.0096	2.97e-09	++++-++++-++-+++?+++++++++++	0.857	38160
rs13035239	2	25134000	a	t	0.3251	0.0483	0.0081	2.982e-09	++++-+++++++-+-++-+++?++?+++	0.2063	38668
rs522367	1	177901713	t	c	0.5645	-0.0452	0.0076	2.988e-09	---------------+-----+----++	0.6359	39618
rs8055543	16	19926191	t	c	0.868	0.0665	0.0112	2.993e-09	+++-+++-++++-++?+?++++++-+++	0.924	38693
rs10205326	2	25111734	t	c	0.3203	0.0483	0.0081	3.004e-09	++++-+++++++-+0++-+++-++-+++	0.1489	39618
rs10164466	2	25114069	t	c	0.6754	-0.0482	0.0081	3.046e-09	----+-------+-+--+---?--?---	0.1991	38668
rs67083646	2	614081	t	g	0.3589	-0.0487	0.0082	3.076e-09	-+----------+--?-?--+??-?-+-	0.7915	36110
rs8030	1	177897975	t	c	0.2952	0.0488	0.0082	3.1e-09	+++-+++-++++-++++-++++-+++-+	0.05297	39618
rs10204896	2	25427035	a	t	0.8016	0.058	0.0098	3.112e-09	+++++++++-++-+++?+++++++++++	0.878	38160
rs11074418	16	19940498	t	c	0.1333	-0.0662	0.0112	3.141e-09	---+---+----+--?-?------+---	0.95	38693
rs11640504	16	19932045	a	g	0.1324	-0.0663	0.0112	3.181e-09	---+---+----+--?-?------+---	0.9247	38693
rs11030034	11	27516785	c	g	0.3114	0.0541	0.0091	3.212e-09	+-++++-++++--+++?+-+-+++++++	0.058	38160
rs56200610	2	24966573	t	c	0.2838	-0.0505	0.0085	3.28e-09	----+--+--+---+-?+------+---	0.6226	38159.9
rs11683429	2	25120733	a	t	0.3173	0.0485	0.0082	3.282e-09	++++-+++++++-++++-+++-++-+++	0.1781	39617.9
rs11895026	2	25036858	a	c	0.2325	-0.0536	0.0091	3.342e-09	-------+--+---++?-+---------	0.8949	38160
rs953567	1	74977425	a	g	0.5846	-0.0479	0.0081	3.38e-09	------++-++----???---?--?-+-	0.8596	36285.1
rs4665775	2	25407121	a	g	0.7952	0.0565	0.0096	3.433e-09	++++-++++-++-+++?+++++++++++	0.8496	38160
rs10203898	2	556738	a	g	0.9254	0.087	0.0147	3.497e-09	++++++++++-++++?+?++++++++++	0.5208	38693
rs17744531	2	25302846	a	g	0.2676	0.0521	0.0088	3.521e-09	++++++++++-+-++-+++++++-++++	0.8913	39618
rs10742179	11	27650524	a	g	0.2676	-0.0513	0.0087	3.522e-09	-+------+++----?-?-+-?--?---	0.09805	37743
rs10195271	2	25108650	a	c	0.3241	0.0476	0.0081	3.529e-09	++++-+++++++-+-++-+++-++-+++	0.1862	39618
rs11639988	16	19944363	a	g	0.8639	0.0643	0.0109	3.531e-09	+++-+++-++++-+++++++++++-+++	0.9283	39724
rs11030084	11	27643725	t	c	0.1856	-0.057	0.0097	3.536e-09	---------++-++--------------	0.4958	39618
rs17817288	16	53807764	a	g	0.5113	-0.0459	0.0078	3.547e-09	----++++----+-+???----------	0.09243	37235
rs7541513	1	75014195	a	g	0.4284	0.0456	0.0077	3.559e-09	++++++--+--++++?+?++++++++-+	0.5967	38794
rs1031477	12	50218644	t	c	0.5326	0.0469	0.0079	3.579e-09	+-+??+++++?+?+-???++++++++-+	0.8057	35225
rs11030104	11	27684517	a	g	0.796	0.0549	0.0093	3.622e-09	+++++++----+--+?+?++-+++++++	0.2565	38798
rs73146366	2	552586	t	c	0.9254	0.0868	0.0147	3.698e-09	++++++++++-++++?+?++++++++++	0.5401	38693.1
rs73146364	2	552493	t	c	0.9254	0.0868	0.0147	3.75e-09	++++++++++-++++?+?++++++++++	0.5398	38693
rs56186499	2	24964459	a	g	0.7159	0.0502	0.0085	3.881e-09	++++-++-++-+++-+?-++++++-+++	0.6243	38160
rs12612542	2	25403678	t	c	0.2052	-0.057	0.0097	3.916e-09	----+----+--+-+-?----?--?---	0.8184	37210
rs8047395	16	53798523	a	g	0.5065	0.046	0.0078	3.938e-09	++++-+---+++-+-???-++++-++++	0.03835	37235.1
rs2168711	18	57848531	t	c	0.7744	-0.0539	0.0092	3.953e-09	----+--+--+-++-?-?+-+-------	0.09546	38693.1
rs663129	18	57838401	a	g	0.2271	0.0536	0.0091	4.088e-09	++++-++-++-+--+?+?-+-+++++++	0.1528	38693
rs11640942	16	19919946	t	c	0.1326	-0.0655	0.0111	4.134e-09	---+---+----+----+------+---	0.9301	39618
rs9463653	6	50835180	a	g	0.7055	-0.0489	0.0083	4.153e-09	------+--+--------++--------	0.5463	39618.1
rs7240682	18	57824038	c	g	0.7799	-0.054	0.0092	4.172e-09	---++--+--+-++-+--+-+-------	0.08755	39617.9
rs12185580	2	25405435	a	t	0.2051	-0.0562	0.0096	4.279e-09	----+----+--+---?-----------	0.8728	38160
rs55677077	12	50219508	t	c	0.505	-0.0458	0.0078	4.288e-09	------------+-+???--------+-	0.475	37235
rs9473924	6	50834157	t	g	0.2945	0.0494	0.0084	4.321e-09	++++++-++-+++++?+?--++++++++	0.4262	38693
rs5016125	2	619056	a	g	0.6438	0.0481	0.0082	4.342e-09	+-++++++++++-++?+?++-??+?+-+	0.8212	36110
rs11675013	2	25107208	a	g	0.3246	0.0473	0.0081	4.343e-09	++++-+++++++-+-++-+++-++-+++	0.1837	39618
rs111675422	2	25408582	t	c	0.2029	-0.0563	0.0096	4.367e-09	----+----+--+---?-----------	0.8411	38160.1
rs10875987	12	50254064	a	g	0.6239	0.0477	0.0081	4.434e-09	++++++++++++++++?+-+++++++-+	0.3695	38160
rs13030692	2	25105877	a	c	0.325	0.0473	0.0081	4.456e-09	++++-+++++++-+-++-+++-++-+++	0.1731	39618
rs4665776	2	25408034	a	g	0.7957	0.0562	0.0096	4.497e-09	++++-++++-++-+++?+++++++++++	0.8532	38160
rs6761875	2	24972217	t	c	0.7152	0.0505	0.0086	4.507e-09	++++-++-++-+++-+?-+++?++?+++	0.6162	37210
rs1865688	2	25108245	c	g	0.6754	-0.0473	0.0081	4.57e-09	----+-------+-+--+---+--+---	0.1849	39618
rs476828	18	57852587	t	c	0.7695	-0.0521	0.0089	4.614e-09	----+--+--+-+--+--+-+-------	0.1222	39725
rs66922415	18	57848651	a	g	0.7737	-0.0535	0.0091	4.652e-09	----+--+--+-++-?-?+-+-------	0.1546	38693
rs9473932	6	50857995	a	g	0.2956	0.0485	0.0083	4.669e-09	++++++-++-+++++?+?--++++++++	0.3713	38799
rs13404163	2	25126616	a	g	0.6725	-0.0477	0.0081	4.709e-09	----+-------+-+--+---?--?---	0.243	38668
rs7593130	2	25138987	t	c	0.756	-0.0522	0.0089	4.729e-09	-++-+---+---+---?+----------	0.4747	38259
rs4665774	2	25404982	t	g	0.7948	0.056	0.0096	4.759e-09	++++-++++-++-+++?+++++++++++	0.8791	38160.1
rs4665771	2	25404327	t	c	0.7947	0.056	0.0096	4.775e-09	++++-++++-++-+0+?+++++++++++	0.8715	38160
rs4923460	11	27656789	t	g	0.2042	-0.0551	0.0094	4.828e-09	--------+++-++-?-?------+---	0.2688	38693
rs7571168	2	616010	t	c	0.3579	-0.0479	0.0082	4.873e-09	-+----------+--?-?--+??-?-+-	0.8112	36110
rs13387053	2	25103025	a	g	0.3248	0.0471	0.0081	4.889e-09	++++-+++++++-+-++-+++-++-+++	0.1936	39618
rs17046917	2	25412032	t	g	0.7964	0.056	0.0096	4.897e-09	++++-++++-++-+0+?+++++++++++	0.8288	38160
rs13412941	2	25102709	t	c	0.3249	0.0471	0.0081	4.908e-09	++++-+++++++-+-++-+++-++-+++	0.1957	39618
rs4665777	2	25410896	t	c	0.2035	-0.056	0.0096	4.917e-09	----+----+--+---?-----------	0.8284	38160.1
rs13428789	2	25087643	t	c	0.335	0.0474	0.0081	4.93e-09	++++-+++++++-+-++-+++?++?+++	0.2349	38668
rs28482811	16	19925612	t	c	0.8327	0.0611	0.0104	4.976e-09	+++-+++-++++-+++?-++++++-+++	0.881	38160
rs17801121	2	25304287	t	c	0.2666	0.0515	0.0088	5.016e-09	++++++++++-+-++-+++++++-++++	0.8825	39618
rs7228430	18	57733925	a	g	0.2551	0.0509	0.0087	5.022e-09	+++++++--+-++-+-++++-+++++++	0.1267	39618
rs9463656	6	50859655	a	g	0.7056	-0.0491	0.0084	5.036e-09	------+--+-----?-?++--------	0.3727	38693.1
rs13412228	2	25411645	t	c	0.7963	0.056	0.0096	5.042e-09	++++-++++-++-+-+?+++++++++++	0.8278	38160
rs491147	2	25313001	c	g	0.2667	0.0515	0.0088	5.088e-09	++++++++++-+-++-+++++++-++++	0.8602	39618.1
rs4665778	2	25410970	a	t	0.7963	0.056	0.0096	5.093e-09	++++-++++-++-+0+?+++++++++++	0.8307	38160
rs7556831	2	612453	t	g	0.3563	-0.0479	0.0082	5.134e-09	-+----------+--?-?--+??-?-+-	0.8319	36110
rs12619264	2	25421803	t	c	0.2038	-0.0559	0.0096	5.135e-09	----+----+--+-0-?-----------	0.7739	38160.1
rs2966399	2	614578	a	g	0.3576	-0.0479	0.0082	5.162e-09	-+----------+--?-?--+??-?-+-	0.8221	36110
rs7204864	16	19942927	t	c	0.136	-0.065	0.0111	5.175e-09	---+---+----+--?-?------+---	0.9568	38693
rs72810017	2	25410997	c	g	0.2037	-0.0559	0.0096	5.179e-09	----+----+--+-0-?-----------	0.8308	38160
rs925947	11	27667367	t	g	0.2037	-0.055	0.0094	5.206e-09	--------+++-++-?-?-+--------	0.2851	38693
rs13335015	16	19905164	t	g	0.1836	-0.0588	0.0101	5.211e-09	---+---+-+--+---?----+--+---	0.7799	38160
rs2384090	2	25406190	t	c	0.7935	0.0565	0.0097	5.237e-09	++++-++++-++-+++?++++?++?+++	0.814	37210
rs6416056	11	27646745	a	g	0.7272	0.0493	0.0084	5.253e-09	+-++++++---++++-++++++++-+++	0.2837	39618
rs4923463	11	27672500	a	g	0.7962	0.055	0.0094	5.28e-09	++++++++---+--+?+?+-++++++++	0.2928	38693
rs34379767	11	27704209	a	g	0.2097	-0.0542	0.0093	5.365e-09	-------++-+-++-+-+--+---+---	0.4383	39618
rs9631061	2	25109804	t	c	0.3259	0.0472	0.0081	5.366e-09	++++-+++++++-+-++-+++-++-+++	0.1947	39618
rs60886478	2	555978	t	c	0.0765	-0.0857	0.0147	5.4e-09	----------+----?-?----------	0.5884	38693
rs1992153	2	25338053	a	g	0.2899	-0.0501	0.0086	5.407e-09	------------+-------+-------	0.7815	39617.9
rs11030087	11	27646246	t	c	0.2721	-0.05	0.0086	5.44e-09	-+------+++----?-?------+---	0.2535	38693
rs11030099	11	27677583	a	c	0.2033	-0.0551	0.0095	5.461e-09	--------+++-++-?-?-+----+---	0.2897	38693
rs11030100	11	27677586	t	g	0.2033	-0.0551	0.0095	5.474e-09	--------+++-++-?-?-+----+---	0.2896	38693
rs4665773	2	25404975	a	c	0.2055	-0.0564	0.0097	5.477e-09	----+----+--+---?----?--?---	0.8271	37209.9
rs4665772	2	25404425	t	c	0.2057	-0.0564	0.0097	5.495e-09	----+----+--+-0-?----?--?---	0.8169	37210
rs6709992	2	614998	a	g	0.3562	-0.0477	0.0082	5.551e-09	-+----------+--?-?--+??-?-+-	0.8089	36110
rs4665284	2	25339658	a	g	0.2814	-0.0495	0.0085	5.618e-09	------------+-------+-------	0.8624	39723
rs7601009	2	612364	t	c	0.6459	0.0479	0.0082	5.626e-09	+-++++++++++-++?+?++-??+?+-+	0.7309	36110
rs6713093	2	25431508	a	g	0.208	-0.0559	0.0096	5.656e-09	----+----+--+-+-?-----------	0.74	38159.9
rs140138951	11	27653995	t	c	0.2056	-0.0544	0.0093	5.665e-09	--------+++-++-+---+----+---	0.2641	39618
rs68191244	18	57733386	t	c	0.745	-0.0507	0.0087	5.675e-09	-------++-+--+-+----+-------	0.1227	39618
rs3769669	2	24949056	a	g	0.2317	-0.053	0.0091	5.678e-09	----+--+--+---++?-+---------	0.6149	38160
rs7575363	2	25342914	a	g	0.7223	-0.049	0.0084	5.68e-09	----------+----+-+-----+----	0.837	39724
rs4923461	11	27656910	a	g	0.7967	0.0543	0.0093	5.696e-09	++++++++---+--+?+?++++++-+++	0.2466	38794
rs146657299	12	50272596	a	t	0.8118	-0.0801	0.0137	5.709e-09	---++--+-?+-?-?-?-------+-+-	0.4777	35018
rs4923457	11	27648580	a	t	0.796	0.0549	0.0094	5.712e-09	++++++++---+--+?+?++++++-+++	0.2486	38692.9
rs36029218	11	27648371	a	t	0.796	0.0549	0.0094	5.719e-09	++++++++---+--+?+?++++++-+++	0.2485	38692.9
rs10187348	2	25078415	c	g	0.3227	0.0475	0.0082	5.743e-09	++++-+++++++-+-++-+++?++?+++	0.3094	38668
rs4854329	2	617176	c	g	0.3817	-0.0471	0.0081	5.783e-09	-+----------+---?---+-----+-	0.5684	38160
rs11689042	2	25057054	c	g	0.261	-0.0505	0.0087	5.954e-09	-------++-+---++--+---------	0.874	39618
rs7972100	12	50228790	t	c	0.3696	-0.0471	0.0081	6.002e-09	----------------?-+-------+-	0.7385	38160
rs4301747	11	27652717	a	g	0.203	-0.0552	0.0095	6.005e-09	--------+++-?+-+--------+---	0.3251	38562.1
rs874401	2	25402280	a	g	0.207	-0.0556	0.0096	6.012e-09	----+----+--+-+-?-----------	0.8868	38160.1
rs67654037	2	614054	a	g	0.3562	-0.0476	0.0082	6.027e-09	-+----------+--?-?--+??-?-+-	0.8098	36110
rs17042105	2	614111	a	g	0.6438	0.0476	0.0082	6.029e-09	+-++++++++++-++?+?++-??+?+-+	0.8098	36110
rs2947413	2	613516	a	g	0.6438	0.0476	0.0082	6.084e-09	+-++++++++++-++?+?++-??+?+-+	0.8107	36110
rs2947412	2	613838	a	g	0.3562	-0.0476	0.0082	6.092e-09	-+----------+--?-?--+??-?-+-	0.8106	36110
rs2966400	2	613883	a	g	0.6438	0.0476	0.0082	6.101e-09	+-++++++++++-++?+?++-??+?+-+	0.8103	36110
rs34347366	2	614235	t	c	0.6438	0.0476	0.0082	6.111e-09	+-++++++++++-++?+?++-??+?+-+	0.8097	36110
rs10186053	2	25410190	a	g	0.7963	0.0557	0.0096	6.131e-09	++++-++++-++-+0+?+++++++++++	0.838	38160
rs36071142	2	25080570	t	c	0.3228	0.0474	0.0082	6.304e-09	++++-+++++++-+-++-+++?++?+++	0.3094	38668.1
rs7597157	2	25089166	t	c	0.3263	0.0462	0.0079	6.334e-09	++++-+++++++-+-++-+++-++-+++	0.2211	39722
rs10184813	2	25090236	t	c	0.6724	-0.0472	0.0081	6.368e-09	----+-------+-+--+---?--?---	0.2637	38667.9
rs4665770	2	25404307	a	g	0.2061	-0.0562	0.0097	6.396e-09	----+----+--+-0-?----?--?---	0.8124	37209.9
rs6567155	18	57755117	t	c	0.2404	0.0515	0.0089	6.422e-09	+++++++-++-+-++?+?++-++++++-	0.08245	38799
rs1965131	2	25446249	t	c	0.2057	-0.0559	0.0096	6.429e-09	----+----+--+---?-----------	0.8032	38159.9
rs62140561	2	25010418	a	g	0.2235	-0.0549	0.0095	6.435e-09	-------++-+---+-?-+--?--?---	0.7178	37210
rs2683989	2	599547	a	c	0.3631	-0.049	0.0084	6.47e-09	-+----------+--???--+??-?-+-	0.8323	34652
rs28588186	16	19910313	c	g	0.8113	0.0579	0.01	6.48e-09	+++-+++-+-++-+++?++++-++-+++	0.7707	38160.1
rs16969339	16	19914784	a	t	0.1795	-0.0583	0.01	6.514e-09	---+---+-+--+---?----+--+---	0.8125	38160
rs6759177	2	601580	t	c	0.3617	-0.0484	0.0083	6.545e-09	-+----------+--???--+??-?-+-	0.7427	34652
rs4665779	2	25412672	a	g	0.7961	0.0561	0.0097	6.651e-09	++++-++++-++-+0+?++++?++?+++	0.7762	37210
rs12619868	2	25412845	t	c	0.7962	0.0561	0.0097	6.661e-09	++++-++++-++-+0+?++++?++?+++	0.7765	37210
rs7605313	2	616168	t	g	0.6438	0.0474	0.0082	6.679e-09	+-++++++++++-++?+?++-??+?+-+	0.8057	36110
rs72807668	2	25307080	a	t	0.2681	0.0511	0.0088	6.698e-09	++++++++++-+-++-+++++++-++++	0.875	39618
rs1539952	18	57766512	a	g	0.7621	-0.052	0.009	6.719e-09	-------+--+-+--?-?--+------+	0.1025	38693
rs6545698	2	24959261	t	g	0.7146	0.0495	0.0085	6.729e-09	++++-++-++-+++-+?-++++-+-+++	0.6176	38160
rs13418905	2	25341001	a	g	0.2843	-0.0505	0.0087	6.731e-09	------------+-------++------	0.7221	39618
rs11030086	11	27646157	a	t	0.2889	-0.0495	0.0085	6.774e-09	-+------+++--+-?-?-+-?--?---	0.1784	37743
rs12619018	2	25426798	t	c	0.2042	-0.0555	0.0096	6.815e-09	----+----+--+-0-?-----------	0.79	38160
rs11889662	2	24942448	t	c	0.7675	0.0527	0.0091	6.931e-09	++++-++-++-+++--?+-+++++++++	0.5937	38159.9
rs60946859	2	25426592	c	g	0.2041	-0.0555	0.0096	6.943e-09	----+----+--+-+-?-----------	0.7894	38160.1
rs77848049	2	25240067	a	g	0.1954	0.0587	0.0101	6.961e-09	+-++++++++-+-+++?++++?++?+++	0.89	37210.1
rs4898536	12	50240150	t	c	0.6701	0.0474	0.0082	6.988e-09	++++-++++++++++???-++?++?+-+	0.4067	36389
rs1861866	16	53804340	t	c	0.5082	0.045	0.0078	7e-09	++++-+---+++-+-???-++++-++++	0.0289	37235.1
rs2966401	2	613869	a	g	0.6433	0.0474	0.0082	7.016e-09	+-++++++++++-++?+?++-??+?+-+	0.81	36110
rs28432761	16	53823878	t	c	0.4827	-0.0447	0.0077	7.034e-09	-+--+-+++-+-----?++---------	0.1005	38160
rs9921480	16	19919440	c	g	0.8333	0.0605	0.0105	7.054e-09	+++-+++-++++-+++?+++++++-+++	0.9034	38160
rs4074134	11	27647285	t	c	0.2033	-0.054	0.0093	7.135e-09	--------+++-++-?-?------+---	0.2221	38797
rs12966111	18	57735675	c	g	0.7416	-0.0502	0.0087	7.165e-09	-------++-+-+--+----+------+	0.1471	39618
rs962369	11	27734420	t	c	0.7017	-0.0484	0.0084	7.222e-09	------++--------?-----------	0.6507	38160
rs11688754	2	25133885	t	c	0.3247	0.0466	0.0081	7.225e-09	++++-+++++++-+-++-+++-++-+++	0.192	39617.9
rs11125797	2	25037626	t	g	0.2332	-0.053	0.0092	7.274e-09	-------+--+---++?-+--?--?---	0.8572	37210
rs8055197	16	53803156	a	g	0.5082	0.045	0.0078	7.311e-09	++++-+---+++-+-???-++++-++++	0.02913	37235
rs112484812	2	25425899	c	g	0.7957	0.0554	0.0096	7.465e-09	++++-++++-++-+++?+++++++++++	0.8063	38160
rs7483762	11	27653879	a	g	0.2034	-0.0539	0.0093	7.674e-09	--------+++-++-+--------+---	0.3148	39618
rs3885610	16	19923044	t	c	0.8329	0.0604	0.0105	7.69e-09	+++-+++-++++-+++?+++++++-+++	0.9009	38160.1
rs12419948	11	27666984	a	t	0.2031	-0.0539	0.0093	7.724e-09	--------+++-++-+---+--------	0.344	39618
rs112166082	2	25428312	t	c	0.204	-0.0553	0.0096	7.734e-09	----+----+--+-0-?-----------	0.7936	38160
rs7576314	2	25138765	t	c	0.245	0.0521	0.009	7.81e-09	+--+-+++-+++-+++?-++++++++++	0.5004	38160.1
rs66493557	2	25429405	a	g	0.2029	-0.0554	0.0096	7.867e-09	---------+--+---?-----------	0.8149	38160
rs4665288	2	25437054	t	c	0.7966	0.0555	0.0096	7.872e-09	++++-++++-++-+++?+++++++++++	0.7737	38160.1
rs66908137	12	50219489	t	c	0.5134	-0.0451	0.0078	7.873e-09	------+-----+-+???--------+-	0.3406	37235
rs7237076	18	57752803	a	c	0.7581	-0.0517	0.009	7.892e-09	-------+--+-++-?-?--+------+	0.07858	38692.9
rs3751813	16	53818708	t	g	0.5417	0.0458	0.0079	7.894e-09	+-+??+---+-+?+-+?--++++-++-+	0.01708	36206
rs16917204	11	27668355	c	g	0.2031	-0.0538	0.0093	7.929e-09	--------+++-++-+---+--------	0.3469	39618
rs66707897	2	25438335	t	g	0.7966	0.0555	0.0096	7.933e-09	++++-++++-++-+++?+++++++++++	0.774	38160
rs13382979	2	25131736	a	g	0.3256	0.0465	0.0081	7.976e-09	++++-+++++++-+-++-+++-++-+++	0.1828	39617.9
rs9922047	16	53806280	c	g	0.4916	-0.0448	0.0078	7.989e-09	----+-+++---+-+???+----+----	0.02896	37235
rs11169166	12	50215905	t	c	0.5344	0.0446	0.0077	8.001e-09	+-++++++++++-+-+?+++++++++-+	0.5431	38160
rs7976060	12	49707102	a	g	0.2317	0.0537	0.0093	8.003e-09	++++++--++-+-++-+-++++++++++	0.715	39618
rs67221599	2	25131948	t	c	0.6754	-0.0464	0.008	8.106e-09	----+-------+-+--+---+--+---	0.1767	39617.9
rs11836282	12	50177324	a	t	0.7256	-0.0526	0.0091	8.186e-09	------+---+-+--???---++-----	0.02826	37234.9
rs59394232	2	25453213	c	g	0.2032	-0.0561	0.0097	8.195e-09	----+----+--+---?-----------	0.7373	38159.9
rs11168973	12	49710572	c	g	0.7705	-0.053	0.0092	8.282e-09	------++----+--+-+--+-------	0.7444	39618
rs10170104	2	25351693	c	g	0.2614	0.051	0.0089	8.284e-09	+--+++++++-+-++-+-+++++-++++	0.5812	39618
rs112729989	2	25439539	a	g	0.2035	-0.0554	0.0096	8.349e-09	----+----+--+---?-----------	0.7745	38160.1
rs4665783	2	25448050	a	g	0.7961	0.0557	0.0097	8.371e-09	++++-++++-++-+++?+++++++++++	0.75	38160
rs17046737	2	25127835	t	c	0.3273	0.0464	0.0081	8.393e-09	++++-+++++++-+-++-+++-++-+++	0.2137	39618
rs2883659	16	19911174	t	g	0.8163	0.0577	0.01	8.431e-09	+++-+++-+-++-+++?++++-++-+++	0.8098	38159.9
rs4479345	18	57735792	t	c	0.2585	0.0499	0.0087	8.583e-09	+++++++--+-+-++-++++-++++++-	0.1465	39617.9
rs10501087	11	27670108	t	c	0.7969	0.0536	0.0093	8.586e-09	++++++++---+--+?+?+-++++++++	0.2519	38796
rs12471258	2	25432145	a	g	0.2033	-0.0553	0.0096	8.62e-09	---------+--+---?-----------	0.7839	38160
rs28564801	18	57780253	t	c	0.7617	-0.0517	0.009	8.69e-09	-------+--+-+--?-?--+------+	0.1122	38692.9
rs13428763	2	25132855	t	g	0.6753	-0.0463	0.008	8.771e-09	----+-------+-+--+---+--+---	0.1784	39618
rs112557069	2	25425972	t	c	0.7958	0.0557	0.0097	8.991e-09	++++-++++-++-+++?++++?++?+++	0.7326	37210
rs11125923	2	25336277	a	g	0.2782	-0.0496	0.0086	9.047e-09	------------+-------+-------	0.8645	39618
rs62144584	2	25004937	t	c	0.7146	0.0498	0.0087	9.137e-09	++++-++-++-+++-+?-+++?++?+++	0.6129	37210.1
rs12624309	2	25437885	a	c	0.2026	-0.0554	0.0096	9.163e-09	----+----+--+---?-----------	0.775	38160
rs10196998	2	25091786	a	g	0.3237	0.0467	0.0081	9.229e-09	++++-+++++++-+-++-+++-++-+++	0.2671	39617.9
rs1942860	18	57756055	t	c	0.2389	0.052	0.009	9.309e-09	+++++++-++-+--+?+?++-++++++-	0.08484	38693
rs113842013	2	25440403	t	c	0.2068	-0.0552	0.0096	9.503e-09	----+----+--+-+-?-----------	0.7261	38160
rs61765651	1	72754314	t	c	0.1701	-0.0584	0.0102	9.503e-09	----+--+--+----?-?-------+--	0.7101	38693
rs79782580	18	57889651	a	g	0.7528	-0.0513	0.0089	9.692e-09	-------+--+-?+-+--+-+-------	0.3219	38562
rs4077677	2	25122798	c	g	0.3247	0.0462	0.008	9.699e-09	++++-+++++++-+-++-+++-++-+++	0.1776	39618
rs66751349	16	19911869	t	c	0.1836	-0.0574	0.01	9.733e-09	---+---+-+--+---?----+--+---	0.8109	38160.1
rs13420827	2	25453968	c	g	0.7965	0.0559	0.0097	9.787e-09	++++-++++-++-+++?+++++++++++	0.7648	38160
rs11520442	18	57744576	t	c	0.7585	-0.0514	0.009	9.813e-09	-------+--+-++-?-?--+------+	0.08197	38693
rs35578933	18	57749186	t	c	0.7585	-0.0514	0.009	9.842e-09	-------+--+-++-?-?--+------+	0.08157	38693
rs7106058	11	27655318	t	c	0.7111	0.0479	0.0084	1.009e-08	+-++++++---++-+-+++-++++-+++	0.2646	39618.1
rs2082882	2	25445121	t	c	0.797	0.0553	0.0097	1.012e-08	++++-++++-++-+++?+++++++++++	0.7808	38160.1
rs7571872	2	616686	t	c	0.3567	-0.0469	0.0082	1.013e-08	-+----------+--?-?--+??-?-+-	0.7957	36110
rs55758326	12	50217231	t	c	0.5065	0.0447	0.0078	1.033e-08	+-++++++++++-+-???++++++++-+	0.3205	37234.9
rs4665782	2	25433965	a	g	0.2048	-0.0549	0.0096	1.039e-08	----+----+--+-+-?-----------	0.7995	38160
rs2164411	2	25452906	a	g	0.2022	-0.0557	0.0097	1.04e-08	----+----+--+-0-?-----------	0.7646	38160
rs66589178	2	25425616	c	g	0.2044	-0.0553	0.0097	1.072e-08	----+----+--+-0-?----?--?---	0.7517	37210
rs61765650	1	72753112	a	g	0.8313	0.0585	0.0102	1.075e-08	++++-++-++-++++?+?+++++++-++	0.7498	38693.1
rs10176698	2	25416590	t	c	0.2024	-0.0555	0.0097	1.098e-08	----+----+--+-+-?----?--?---	0.7487	37209.9
rs3731631	2	25359422	a	g	0.2774	0.0502	0.0088	1.099e-08	+?+??+++++?+?++-+-+++++-++++	0.6786	37067
rs66674044	16	19904344	a	t	0.8673	0.0648	0.0114	1.11e-08	+++-+++-++++-++?+?++++++-+++	0.884	38693
rs10202360	2	25420865	a	c	0.7949	0.0546	0.0096	1.111e-08	++++-++++-++-+-+?+++++++++++	0.8224	38159.9
rs13012304	2	25122246	t	c	0.3246	0.046	0.008	1.111e-08	++++-+++++++-+-++-+++-++-+++	0.1805	39618
rs36029941	2	25127801	t	c	0.327	0.046	0.0081	1.127e-08	++++-+++++++-+-++-+++-++-+++	0.2122	39618
rs76645364	2	25393388	a	g	0.7873	0.0547	0.0096	1.129e-08	+++++++++-++++++?+++++++++++	0.8696	38160
rs13398155	2	25128550	t	c	0.3269	0.046	0.0081	1.132e-08	++++-+++++++-+-++-+++-++-+++	0.2085	39617.9
rs57835771	2	25444438	c	g	0.2039	-0.0551	0.0096	1.144e-08	----+----+--+---?-----------	0.8011	38160.1
rs3731629	2	24955160	a	g	0.7129	0.0486	0.0085	1.152e-08	++++-+--++-+++-+?-++++++-+++	0.7082	38160.1
rs11030067	11	27620932	t	c	0.2228	0.0522	0.0091	1.159e-08	+-++++-+++++-+-+++-+-+++++++	0.08554	39618.1
rs958717	2	25325444	t	c	0.2783	-0.0493	0.0086	1.169e-08	------------+-------+-------	0.8622	39617.9
rs35072958	2	25125824	t	c	0.327	0.0459	0.0081	1.176e-08	++++-+++++++-+-++-+++-++-+++	0.2178	39618.1
rs10167020	2	25429424	a	g	0.7956	0.0547	0.0096	1.177e-08	+++++++++-++-+0+?+++++++++++	0.8422	38160.1
rs12102869	16	19918987	t	c	0.8322	0.0602	0.0106	1.183e-08	+++-+++-++++-++???++++++-+++	0.9325	37235
rs6719064	2	25125003	a	g	0.327	0.0459	0.0081	1.183e-08	++++-+++++++-+-++-+++-++-+++	0.2184	39618
rs7560156	2	25124794	t	c	0.673	-0.0459	0.0081	1.184e-08	----+-------+-+--+---+--+---	0.2186	39618
rs4244531	11	27657250	a	g	0.7914	0.053	0.0093	1.197e-08	+++++++----+--+-++++++++++++	0.2506	39618
rs2613496	1	72754788	t	c	0.1735	-0.0578	0.0101	1.207e-08	----+--+--+----?-?-------+--	0.7357	38693
rs12468449	2	25432277	t	c	0.7948	0.0546	0.0096	1.214e-08	++++-++++-++-+-+?+++++++++++	0.8051	38160
rs10171663	2	25086431	t	c	0.6656	-0.0457	0.008	1.232e-08	----+-------+-+--+---+--+---	0.2267	39618
rs57534183	2	25444484	c	g	0.2037	-0.055	0.0097	1.236e-08	----+----+--+---?-----------	0.8024	38160
rs11645492	16	19914412	t	g	0.8193	0.0572	0.01	1.246e-08	+++-+++-+-++-+++?++++-++-+++	0.7599	38160
rs12233134	2	25329016	t	c	0.2783	-0.0492	0.0086	1.261e-08	------------+-------+-------	0.86	39618
rs12740789	1	72752073	a	g	0.1708	-0.0573	0.0101	1.264e-08	----+--+--+------+-------+--	0.7906	39618
rs897057	12	50266279	t	c	0.3126	-0.0464	0.0082	1.282e-08	--+-------------?-+-------+-	0.2866	38265
rs41279738	1	110082551	t	g	0.9623	-0.1199	0.0211	1.296e-08	----+----+----+---+---+-----	0.6166	39618
rs4922793	11	27729505	a	g	0.7903	0.0541	0.0095	1.297e-08	+++++++--+-+--+???++-+++-+++	0.3947	37235
rs117432699	12	49711553	t	c	0.2233	0.0534	0.0094	1.297e-08	++++++--++-+-++-+--+-+++++++	0.6708	39618
rs34361149	1	72750470	a	g	0.1717	-0.0577	0.0102	1.308e-08	----+--+--+----?-?-------+--	0.7208	38693
rs11683748	2	25130434	t	c	0.3266	0.0458	0.0081	1.327e-08	++++-+++++++-+-++-+++-++-+++	0.2128	39618
rs35693910	18	57913965	a	g	0.2541	0.0526	0.0093	1.328e-08	+++++++-++-+?-+-?+-+-+++++++	0.4874	37104
rs2891458	2	25445094	a	c	0.2037	-0.0548	0.0097	1.333e-08	----+----+--+---?-----------	0.802	38160.1
rs2384092	2	25402891	t	c	0.7913	0.0542	0.0095	1.337e-08	++++-++++-++-+++?+++++++++++	0.9309	38160.1
rs114929124	1	110088657	a	g	0.0374	0.12	0.0211	1.344e-08	++++-++++-++++-+++-+++-+++++	0.5707	39618
rs144376234	1	110114504	t	c	0.0374	0.1195	0.021	1.348e-08	++++-++++-++++-+++-+++-+++++	0.5229	39618
rs68039326	2	25440478	a	g	0.796	0.0552	0.0097	1.354e-08	++++-++++-++-+++?++++?++?+++	0.7459	37210
rs2384056	2	25092649	a	g	0.3271	0.0457	0.0081	1.355e-08	++++-+++++++-+-++-+++-++-+++	0.2441	39618
rs12233169	2	25329272	t	c	0.2783	-0.049	0.0086	1.367e-08	------------+-------+-------	0.853	39618
rs12612413	2	25426846	t	g	0.2053	-0.0549	0.0097	1.37e-08	----+----+--+-+-?----?--?---	0.7717	37209.9
rs7116850	11	27645530	a	g	0.7274	0.0473	0.0083	1.374e-08	+-++++++---++-+-++++++++-+++	0.23	39723
rs11685125	2	25092104	a	g	0.6728	-0.0457	0.0081	1.376e-08	----+-------+-+--+---+--+---	0.2466	39618.1
rs4923458	11	27656113	t	c	0.806	0.0552	0.0097	1.377e-08	++++++++-+-+-+++++++++++-+++	0.2332	39618
rs34579341	1	72745962	a	g	0.8218	0.0568	0.01	1.393e-08	++++-++-++-++++?+?+++++++-++	0.6948	38693
rs9921401	16	19919338	c	g	0.833	0.0599	0.0106	1.402e-08	+++-+++-++++-++???++++++-+++	0.9229	37234.9
rs706797	12	50266858	c	g	0.3124	-0.047	0.0083	1.471e-08	--+-------------?-+-------+-	0.2845	38160
rs836967	12	50267613	c	g	0.6862	0.047	0.0083	1.473e-08	++-+++++++++++++?+-+++++++-+	0.2451	38160
rs28493849	12	49694626	t	c	0.2153	0.0527	0.0093	1.485e-08	++++++--++-++++++-++-+++++++	0.6945	39618
rs2613499	1	72751552	a	g	0.8262	0.0574	0.0101	1.516e-08	++++-++-++-++++?+?+++++++-++	0.7392	38693.1
rs2613498	1	72752939	t	c	0.1738	-0.0574	0.0101	1.519e-08	----+--+--+----?-?-------+--	0.7388	38693.1
rs11030119	11	27728102	a	g	0.2999	0.0472	0.0083	1.523e-08	++++++--++++++++?+++++++++++	0.6063	38160
rs618759	1	177885488	a	g	0.6776	-0.0455	0.008	1.53e-08	-+-+---+--+-+----+----+-----	0.0663	39618
rs6720422	2	25371558	a	g	0.4308	-0.0467	0.0083	1.541e-08	-+--------+-+---?+----------	0.9636	38160.1
rs13335003	16	19905083	a	g	0.1832	-0.0575	0.0102	1.554e-08	---+---+-+--+--???---+--+---	0.8185	37235
rs13388961	2	25400665	a	g	0.7539	0.051	0.009	1.555e-08	++++-+-++-++-+++?+++++++++++	0.7717	38159.9
rs12614078	2	25440710	a	c	0.2039	-0.0544	0.0096	1.563e-08	----+----+--+---?-----------	0.7982	38160
rs111574713	2	25443100	t	c	0.2042	-0.0544	0.0096	1.57e-08	----+----+--+---?-----------	0.8095	38160.1
rs2815757	1	72764289	t	c	0.8263	0.0573	0.0101	1.573e-08	++++-++-++-++++?+?+++++++-++	0.7385	38693
rs2613497	1	72753825	a	t	0.1736	-0.0568	0.01	1.577e-08	----+--+--+------+-------+--	0.7802	39618
rs2568957	1	72764430	a	g	0.1737	-0.0573	0.0101	1.578e-08	----+--+--+----?-?-------+--	0.7406	38693
rs836969	12	50265853	t	c	0.6859	0.0467	0.0083	1.586e-08	++-+-+++++++++++?+-+++++++-+	0.2783	38160
rs2568953	1	72753956	t	c	0.1741	-0.0573	0.0101	1.594e-08	----+--+--+----?-?-------+--	0.7355	38693.1
rs2384093	2	25401627	a	g	0.754	0.051	0.009	1.607e-08	++++-+-++-++-+++?+++++++-+++	0.7708	38160
rs35692468	2	25432750	a	g	0.7954	0.0548	0.0097	1.609e-08	++++-++++-++-+0+?++++?++?+++	0.7625	37210
rs13426812	2	25400726	t	c	0.2463	-0.051	0.009	1.631e-08	----+-+--+--+---?-----------	0.7712	38160.1
rs706798	12	50266164	a	g	0.6657	0.0461	0.0082	1.636e-08	++-+++++++++++++?+-+++++++-+	0.3151	38160
rs836970	12	50264802	a	g	0.6859	0.0468	0.0083	1.641e-08	++++-+++++++++++?+-+++++++-+	0.3513	38160.1
rs2815764	1	72754123	a	g	0.1733	-0.0567	0.01	1.643e-08	----+--+--+------+-------+--	0.7957	39618
rs11661876	18	57889652	a	g	0.2438	0.05	0.0089	1.66e-08	+++++++-++-+--+-++-+-+++++++	0.2393	39618.1
rs1077641	2	25123665	a	g	0.3271	0.0454	0.008	1.698e-08	++++-+++++++-+-++-+++-++-+++	0.1628	39618.1
rs72807681	2	25343797	t	g	0.2794	0.0482	0.0085	1.73e-08	++++++++++-+-++-+-+++++-++++	0.8356	39618
rs1968482	2	25086858	t	c	0.6733	-0.0454	0.0081	1.75e-08	----+-------+-+--+---+--+---	0.2443	39618
rs34874247	1	72744950	c	g	0.8216	0.0563	0.01	1.773e-08	++++-++-++-++++?+?+++++++-++	0.6905	38692.9
rs10196507	2	25348584	a	g	0.6677	-0.047	0.0083	1.788e-08	----------+-+--+?+-----+----	0.7053	38160
rs58084604	18	57849429	t	c	0.2265	0.0526	0.0093	1.797e-08	++++-++-++-+--+-++-+-??+?+++	0.06868	37034.9
rs112649642	2	25446899	a	g	0.2044	-0.0543	0.0096	1.83e-08	----+----+--+---?-----------	0.8162	38160
rs953442	18	57797485	t	c	0.7649	-0.0513	0.0091	1.903e-08	-------+--+-+--?-?--+?--?--+	0.09984	37743.1
rs12036473	1	74979975	a	t	0.6068	-0.0452	0.008	1.905e-08	------++-++----???+-------+-	0.9059	37235
rs4854328	2	617150	t	c	0.3792	-0.0454	0.0081	1.953e-08	-+----------+---?---++----+-	0.7187	38160
rs2045438	18	57881362	t	c	0.2519	0.049	0.0087	1.985e-08	+++++++-++-+--+-++-+-+++++++	0.4722	39618
rs2168708	18	57907311	t	g	0.2485	0.05	0.0089	2.015e-08	+++++++-++-+--+-?+-+-+++++++	0.3563	38159.9
rs12960928	18	57897803	t	c	0.7508	-0.0491	0.0088	2.051e-08	-------+--+-++-+--+-+-------	0.3832	39618
rs7575831	2	618360	a	c	0.3832	-0.0459	0.0082	2.06e-08	-+----------+--???--+-----+-	0.8103	37235
rs116377258	1	110131521	a	g	0.9628	-0.1176	0.021	2.084e-08	----+----+----+---+---+-----	0.4855	39618.1
rs12322798	12	49708654	a	g	0.2072	0.0535	0.0095	2.111e-08	++++++--++-++++-+--+-+++++++	0.8013	39618
rs11684619	2	25078859	a	g	0.3221	0.0453	0.0081	2.124e-08	++++-+++++++-+-++-+++-++-+++	0.241	39618
rs7944119	11	27722298	t	g	0.3035	0.0466	0.0083	2.142e-08	+++-++--++++++++?+++++++++++	0.614	38160
rs61446045	2	25444146	a	g	0.7955	0.0545	0.0097	2.168e-08	++++-++++-++-+++?++++?++?+++	0.7756	37210
rs4411340	12	50255629	t	c	0.4607	-0.0483	0.0086	2.183e-08	-+-----+-+--?---?++-----+-+-	0.392	37104
rs916484	2	25082588	a	c	0.6776	-0.0452	0.0081	2.201e-08	----+-------+-+--+---+--+---	0.2399	39617.9
rs916486	2	25082629	a	c	0.3224	0.0452	0.0081	2.202e-08	++++-+++++++-+-++-+++-++-+++	0.2396	39617.9
rs35051342	11	27634373	c	g	0.2044	-0.0527	0.0094	2.205e-08	--------+++-+--?-?----------	0.2604	38693
rs2028195	2	25398953	t	g	0.2498	-0.0512	0.0091	2.209e-08	----+-+--+--+-0-?----?--?---	0.8244	37209.9
rs10767654	11	27640223	t	g	0.2088	-0.0527	0.0094	2.242e-08	--------+++-++-?-?------+---	0.3175	38693
rs523288	18	57848369	a	t	0.7721	-0.0522	0.0093	2.254e-08	----+--+--+-++-+--+-+??-?---	0.08588	37035
rs7228753	18	57734101	a	g	0.2564	0.0491	0.0088	2.28e-08	+++++++--+-++-+?+?++-+++++++	0.283	38693.1
rs4613074	16	19942527	t	c	0.8111	0.0562	0.0101	2.293e-08	+++-+++-++++++++?-++++++-+++	0.6895	38160
rs72853661	2	25439262	t	c	0.7952	0.0537	0.0096	2.306e-08	+++++++++-++-+-+?+++++++++++	0.8157	38159.9
rs11168970	12	49709747	t	c	0.793	-0.0534	0.0096	2.311e-08	------++--+----+-++-+-------	0.8036	39618
rs13384165	2	541207	t	c	0.082	-0.0777	0.0139	2.347e-08	----------+--+--------------	0.2735	39618.1
rs512898	1	177888429	t	c	0.6779	-0.0449	0.008	2.353e-08	-+-+---+--+-+----+----+-----	0.07073	39618.1
rs67194783	18	57890743	t	c	0.2488	0.0489	0.0088	2.386e-08	+++++++-++-+--+-++-+-+++++++	0.3854	39618
rs1317448	2	524774	a	c	0.9147	0.0758	0.0136	2.405e-08	++++++++++-++-++++++++++++++	0.4218	39725
rs9646255	16	19975601	a	t	0.2164	-0.0551	0.0099	2.413e-08	---+---+-+--+---?----?--?---	0.5842	37209.9
rs617763	1	177885238	t	c	0.3225	0.0454	0.0081	2.427e-08	+-+-+++-++-+-++?+?++++-+++++	0.06398	38693
rs11665052	18	57908675	a	g	0.7503	-0.0497	0.0089	2.431e-08	-------+--+-++-+?-+-+-------	0.3614	38160
rs685233	1	177869941	a	g	0.6792	-0.0449	0.0081	2.442e-08	-+-+---+--+-+----+----+-----	0.07592	39618
rs58792474	2	541463	a	g	0.918	0.0784	0.0141	2.444e-08	++++++++++-++-+++++++?++?+++	0.1949	38668
rs7234864	18	57734857	t	c	0.2565	0.0489	0.0088	2.471e-08	+++++++-++-++-+?+?++-+++++++	0.2802	38693
rs73146356	2	547638	a	g	0.0819	-0.0778	0.014	2.489e-08	----------+--+--------------	0.2855	39618
rs879048	11	27638934	a	c	0.7912	0.0525	0.0094	2.506e-08	++++++++---+--+?+?++++++-+++	0.319	38693
rs61888762	11	27709630	c	g	0.6904	-0.046	0.0083	2.548e-08	-+-+--++--------?-----------	0.4717	38160
rs72771023	16	19892565	t	c	0.8692	0.0633	0.0114	2.552e-08	+++-+++-++++-++?+?+++-++-+++	0.7798	38693
rs73146344	2	540077	a	t	0.918	0.0774	0.0139	2.615e-08	++++++++++-++-++++++++++++++	0.2736	39618
rs4665290	2	25445885	a	g	0.7931	0.0542	0.0097	2.685e-08	++++-++++-++-+++?++++?++?+++	0.7867	37210
rs2336059	12	50239459	a	g	0.3606	-0.0455	0.0082	2.706e-08	-+--------------?-+-------+-	0.4526	38160
rs113256009	2	25446797	t	c	0.7955	0.0541	0.0097	2.715e-08	++++-++++-++-+++?++++?++?+++	0.7706	37209.9
rs144916872	2	25125902	t	g	0.107	0.0715	0.0129	2.762e-08	+++++++----+--+-++++++++-+++	0.3831	39618
rs13393389	2	536269	a	t	0.0819	-0.0772	0.0139	2.785e-08	----------+--+--------------	0.278	39618
rs3820933	2	24962252	a	g	0.2142	-0.0513	0.0092	2.792e-08	----+--+--+---++-++-+-------	0.4257	39618
rs2030323	11	27728539	a	c	0.2092	-0.0523	0.0094	2.795e-08	-------++-+-++-+?+-++---+---	0.429	38160
rs643971	12	50283465	a	g	0.4697	0.0442	0.008	2.838e-08	++++-+++++++-++???-++-++-+-+	0.07537	37234.9
rs67713315	18	57888746	a	g	0.7508	-0.0486	0.0088	2.841e-08	-------+--+-++-+--+-+-------	0.3929	39617.9
rs7582597	2	25395053	t	c	0.7542	0.0509	0.0092	2.854e-08	++++-+-++-++-+++?++++?++?+++	0.7474	37210
rs13432822	2	535522	t	c	0.0818	-0.0771	0.0139	2.88e-08	----------+--+--------------	0.2784	39618
rs7238484	18	57735552	t	g	0.2601	0.0485	0.0087	2.922e-08	+++++++--+-+-++?+?++-++++++-	0.3152	38693.1
rs12575096	11	27708844	a	g	0.7957	0.0528	0.0095	2.935e-08	+++++++--+-+--+-?++--+++-+++	0.348	38160
rs66488932	16	19978715	a	g	0.2229	-0.0538	0.0097	2.939e-08	---+---+-+--+---?-------+---	0.4763	38160
rs72769587	16	19858906	t	c	0.8744	0.063	0.0114	2.939e-08	+++-+++-++++-++++++++-++-+++	0.8832	39618
rs55909205	16	19859851	t	c	0.8744	0.063	0.0114	2.94e-08	+++-+++-++++-++++++++-++-+++	0.8832	39618
rs8084085	18	57754018	t	c	0.7602	-0.0509	0.0092	3.008e-08	-------+--+-++-+----+??-?--+	0.02446	37035
rs2864823	2	532756	t	c	0.9182	0.0768	0.0139	3.112e-08	++++++++++-++-++++++++++++++	0.2765	39618
rs10767664	11	27725986	a	t	0.79	0.0532	0.0096	3.136e-08	+?+++++--+-+--+???++-+++-+++	0.3491	36692
rs12790234	11	27708963	a	g	0.7905	0.0522	0.0094	3.141e-08	+++++++--+-+--+-?-++-+++-+++	0.4646	38160
rs114670539	2	207064335	t	c	0.0545	0.0991	0.0179	3.157e-08	+-++++--++-+-+++++++--+++++-	0.1719	39618
rs2815748	1	72816147	a	g	0.825	0.0557	0.0101	3.178e-08	++++-++-+-+++++?+?+++++++-++	0.5395	38693.1
rs11503617	12	49705308	a	t	0.7749	-0.0512	0.0093	3.184e-08	------++--+-+----++-+-------	0.7254	39618
rs143956188	11	27707032	a	g	0.2095	-0.0522	0.0094	3.187e-08	-------++-+-++-+?+--+---+---	0.4634	38160
rs4923466	11	27706565	a	c	0.2095	-0.0522	0.0094	3.192e-08	-------++-+-++-+?+--+---+---	0.4632	38160
rs13415127	2	530804	t	c	0.0818	-0.0767	0.0139	3.192e-08	----------+--+--------------	0.2763	39618
rs4130524	2	535179	t	c	0.0818	-0.0777	0.014	3.201e-08	----------+--+-------?--?---	0.1975	38668
rs117567901	11	27706040	t	c	0.7905	0.0522	0.0094	3.21e-08	+++++++--+-+--+-?-++-+++-+++	0.4629	38160
rs2119117	2	24984135	a	g	0.2167	-0.0518	0.0094	3.218e-08	----+--+--+---++?++-+-------	0.4004	38160
rs1488830	11	27636885	t	c	0.7921	0.052	0.0094	3.282e-08	++++++++---+-++?+?++++++-+++	0.3141	38693
rs1457489	18	57861961	a	g	0.2541	0.0484	0.0088	3.3e-08	+++++++--+-+--+-++-+-+++++++	0.2242	39618
rs9314364	8	28103444	t	g	0.6724	-0.0442	0.008	3.3e-08	---++--+---------+---+-+-+--	0.1034	39725
rs7481311	11	27583129	t	c	0.2196	0.0523	0.0095	3.309e-08	+?+??+-+++?+?+-?+?-+-++++-++	0.209	36145
rs988748	11	27724745	c	g	0.211	-0.0526	0.0095	3.31e-08	-------++-+-++-???-++---+---	0.4073	37235
rs13402232	2	25433545	t	c	0.7993	0.0533	0.0096	3.319e-08	+++++++++-++--++?+++++++++++	0.7748	38160
rs7231987	18	57739840	t	g	0.255	0.0486	0.0088	3.34e-08	+++++++-++-+-++?+?++-++++++-	0.3574	38693
rs533543	1	177869590	a	c	0.683	-0.0448	0.0081	3.363e-08	-+-+---+--+-+----+----++----	0.053	39618.1
rs9941245	16	19916895	t	g	0.8168	0.0551	0.01	3.371e-08	+++-+++-+-++-++???+++-++-+++	0.859	37338
rs11644668	16	19847092	a	t	0.8747	0.0629	0.0114	3.379e-08	+++-+++-++++-++++++++-++-+++	0.8899	39617.9
rs2720293	12	50175380	a	g	0.7173	-0.0502	0.0091	3.399e-08	------+-----+---?----++-----	0.09627	38160
rs11894248	2	24856759	a	g	0.7519	0.0486	0.0088	3.406e-08	++++-++-++-+++--+-++-+-+++++	0.5785	39618
rs2613507	1	72834503	a	g	0.175	-0.055	0.01	3.424e-08	----+--+-+-------+-------+--	0.6996	39618
rs4782292	16	19866760	a	c	0.8733	0.0626	0.0114	3.466e-08	+++-+++-++++-++++++++-++-+++	0.89	39618
rs12737564	1	72739527	a	c	0.8207	0.055	0.01	3.471e-08	++++-++-++-++++?+?+++++++-++	0.6881	38693
rs11664883	18	57877800	a	t	0.2496	0.0482	0.0087	3.474e-08	+++++++-++-+--+-++-+-+++++++	0.4149	39618
rs11865578	16	19871982	a	g	0.1267	-0.0634	0.0115	3.484e-08	---+---+----+--?-?---+--+---	0.8315	38693
rs1942867	18	57736270	a	g	0.2598	0.0482	0.0087	3.496e-08	+++++++--+-+-++?+?++-++++++-	0.3156	38693
rs13107325	4	103188709	t	c	0.0698	0.0953	0.0173	3.513e-08	+++++++-++?-?++??+-++-++-+++	0.2911	36677
rs7567564	2	24856103	a	t	0.7521	0.0486	0.0088	3.517e-08	++++-++-++-+++--+-++-+-+++++	0.6066	39618
rs13383974	2	541079	a	c	0.0751	-0.0797	0.0145	3.519e-08	----------+-++--------------	0.1229	39617.9
rs10208441	2	534818	t	c	0.0818	-0.0766	0.0139	3.556e-08	----------+--+--------------	0.2701	39618
rs2815747	1	72821126	t	g	0.8251	0.0555	0.0101	3.562e-08	++++-++-+-+++++?+?+++++++-++	0.5788	38693
rs7926362	11	27707486	a	c	0.2097	-0.052	0.0094	3.601e-08	-------++-+-++-+?+--+---+---	0.4723	38160.1
rs4782289	16	19859332	a	g	0.1265	-0.0626	0.0114	3.608e-08	---+---+----+--------+--+---	0.8917	39618
rs10177480	2	547662	a	g	0.0838	-0.0767	0.0139	3.616e-08	----------+--+--------------	0.3182	39618
rs1942872	18	57868365	t	c	0.2501	0.0483	0.0088	3.633e-08	+++++++-++-+--+-++-+-+++++++	0.419	39618.1
rs2722946	8	28109970	a	g	0.674	-0.0449	0.0082	3.644e-08	---++--+---------+-----+-+--	0.07334	39617.9
rs2613504	1	72835740	a	g	0.825	0.0548	0.01	3.658e-08	++++-++-+-+++++++-+++++++-++	0.7024	39618
rs6691271	1	74982886	a	t	0.6118	-0.0444	0.0081	3.677e-08	------++-++----???--------+-	0.9179	37235
rs2614117	8	28109439	c	g	0.6748	-0.0449	0.0082	3.688e-08	---++--+---------+-----+-+--	0.07676	39618
rs34376163	1	72738699	t	c	0.8208	0.0548	0.01	3.791e-08	++++-++-++-++++?+?+++++++-++	0.6949	38693
rs28744588	2	24958213	t	c	0.2145	-0.0508	0.0092	3.795e-08	----+--+--+---++-++-+-+-----	0.3784	39618
rs12958167	18	57863469	t	g	0.7497	-0.0481	0.0088	3.852e-08	-------+--+-++-+--+-+-------	0.3996	39618
rs2720295	12	50171714	a	c	0.6259	-0.0469	0.0085	3.862e-08	-+--------+-+--???----------	0.7898	37235
rs41280328	1	110136884	t	c	0.964	-0.1195	0.0217	3.902e-08	----+----+---?+---+---+-----	0.4238	38043
rs72705206	1	110172176	t	c	0.0355	0.1173	0.0214	3.903e-08	++++-++++-++++-+++-+++-+++++	0.2737	39618
rs10177468	2	547620	t	g	0.0837	-0.0765	0.0139	4.019e-08	----------+--+--------------	0.3144	39617.9
rs73910207	2	525879	t	c	0.0819	-0.0761	0.0139	4.028e-08	----------+--+--------------	0.2763	39618
rs6484321	11	27705905	t	g	0.2112	-0.0517	0.0094	4.067e-08	-------++-+-++-+?---+---+---	0.4816	38160
rs67236923	12	49700674	a	g	0.7774	-0.0507	0.0092	4.077e-08	------++--+-+----+--+-------	0.719	39618
rs113274210	16	19907817	c	g	0.8226	0.0562	0.0102	4.1e-08	+++-+++-+-++-+++?++++-++-+++	0.8341	38160
rs2815749	1	72814783	a	g	0.1763	-0.0545	0.0099	4.105e-08	----+--+-+-------+---?--?+--	0.6091	38775
rs4782295	16	19874012	a	g	0.1277	-0.0624	0.0114	4.121e-08	---+---+----+--------+--+---	0.7603	39618
rs10207642	2	25135254	a	g	0.2095	0.0531	0.0097	4.137e-08	+-++-+++++++-+++?-+++?++?+++	0.7385	37210
rs60034874	2	546541	t	c	0.0836	-0.0764	0.0139	4.148e-08	----------+--+--------------	0.3154	39618.1
rs623130	1	177871886	t	c	0.6794	-0.0446	0.0081	4.158e-08	-+-+---+--+-+--?-?----+-----	0.0829	38693
rs1320367	2	524451	t	c	0.0821	-0.0761	0.0139	4.168e-08	----------+--+------------+-	0.2858	39618.1
rs576101	1	177873383	a	t	0.3205	0.0446	0.0081	4.17e-08	+-+-+++-++-+-++?+?++++-+++++	0.08187	38693
rs17024258	1	110147321	t	c	0.038	0.1149	0.0209	4.177e-08	++++-++++-++++-+++-+++-+++++	0.5503	39618.1
rs12641981	4	45179883	t	c	0.4405	0.044	0.008	4.187e-08	+?+??+---+++?+++?++++?++?+++	0.6983	34819
rs1829469	11	27730556	a	g	0.801	0.0529	0.0097	4.208e-08	++++++++---+--+-?-+--+++++++	0.3687	38160
rs112769848	2	558552	t	c	0.9294	0.0859	0.0157	4.228e-08	++++++++++-+++++?+++++++++-+	0.4745	38160
rs13405471	2	525193	t	g	0.0819	-0.076	0.0139	4.228e-08	----------+--+--------------	0.2766	39618
rs73430668	11	27613419	t	c	0.22	0.0501	0.0091	4.241e-08	+-++++-+++++-+-+++-+-++++-++	0.1187	39617.9
rs1317447	2	524826	t	c	0.0819	-0.0759	0.0139	4.276e-08	----------+--+--------------	0.2775	39618
rs4508555	2	24949904	a	g	0.2149	-0.0507	0.0092	4.278e-08	----+--+--+---++-++-+-------	0.3564	39618
rs604388	1	177877979	t	c	0.6765	-0.0446	0.0081	4.299e-08	-+-+---+--+-+--?-?----+-----	0.06695	38693
rs72807682	2	25343820	a	g	0.2764	0.0474	0.0087	4.326e-08	++++++++++-+-++-+-+++?+-?+++	0.7702	38668
rs671596	1	177869287	t	c	0.6768	-0.0446	0.0081	4.329e-08	-+-+---+--+-+--?-?----+-----	0.06692	38693
rs12288512	11	27747671	a	g	0.2035	0.0527	0.0096	4.338e-08	+-++++--+++++++???++++++++++	0.9269	37235
rs4780830	16	19864321	t	g	0.1258	-0.0628	0.0115	4.349e-08	---+---+----+--?-?---+--+---	0.8544	38692.9
rs72769590	16	19864835	t	c	0.1258	-0.0628	0.0115	4.371e-08	---+---+----+--?-?---+--+---	0.8545	38692.9
rs2903487	2	603157	a	g	0.3579	-0.0456	0.0083	4.372e-08	-+----------+--???--+??-?-+-	0.7253	34652
rs4782294	16	19867021	t	c	0.1267	-0.0614	0.0112	4.377e-08	---+---+----+--------+--+---	0.8931	39724
rs10852521	16	53804965	t	c	0.4917	-0.042	0.0077	4.402e-08	----+-+++---+-+-?-+--?-+?---	0.04382	37315
rs12273363	11	27744859	t	c	0.7945	-0.0518	0.0095	4.433e-08	-+----++-------???----------	0.9416	37340
rs2613505	1	72835410	t	c	0.8255	0.0551	0.0101	4.433e-08	++++-++-+-+++++?+?+++++++-++	0.6358	38692.9
rs1317449	2	524298	a	g	0.0821	-0.076	0.0139	4.438e-08	----------+--+------------+-	0.2918	39618
rs7299812	12	49729460	a	g	0.8181	-0.0584	0.0107	4.439e-08	----+--+--+-+---?+--+-------	0.3326	38159.9
rs17041983	2	546610	t	c	0.9164	0.0763	0.0139	4.457e-08	++++++++++-++-++++++++++++++	0.3137	39618
rs67254472	2	25443580	a	t	0.8015	0.0534	0.0098	4.472e-08	+++++++++-++--++?+++++++++++	0.8389	38160
rs7241535	18	57738602	t	g	0.7405	-0.0479	0.0087	4.5e-08	-------++-+-+--?-?--+------+	0.3139	38693
rs921971	18	57861663	t	c	0.7507	-0.0474	0.0087	4.513e-08	-------++-+-++-+--+-+-------	0.3255	39723
rs17024393	1	110154688	t	c	0.9622	-0.1149	0.021	4.525e-08	----+----+----+---+---+-----	0.5548	39618
rs186713513	2	617306	a	g	0.5545	0.0462	0.0085	4.541e-08	+-++++++++++?+++?+++--++++++	0.7216	37103.9
rs72705210	1	110178922	a	g	0.0354	0.1175	0.0215	4.558e-08	++++-++++-++++-+++-+++-+++++	0.2541	39618.1
rs72705208	1	110177509	c	g	0.9646	-0.1173	0.0215	4.587e-08	----+----+----+---+---+-----	0.2459	39618
rs7205054	16	19943026	c	g	0.8119	0.0556	0.0102	4.594e-08	+++-+++-+++++++???++++++-+++	0.7859	37235
rs10798578	1	177856925	t	c	0.6418	-0.0434	0.0079	4.596e-08	-+-+---+----+--?-?+-+-+++-+-	0.3801	38693
rs1993709	1	72838529	a	g	0.1747	-0.055	0.0101	4.656e-08	----+--+-+-----?-?-------+--	0.6451	38693
rs2613508	1	72833582	t	c	0.8258	0.0544	0.01	4.713e-08	++++-++-+-+++++++-+++++++-++	0.6909	39617.9
rs10767647	11	27567392	a	g	0.7821	-0.0503	0.0092	4.809e-08	-+----+-----+-----+-+----+--	0.1491	39618
rs34020954	1	72742387	t	c	0.1787	-0.0539	0.0099	4.821e-08	----+--+--+------+-------+--	0.691	39618
rs12292980	11	27734349	a	g	0.3109	0.0458	0.0084	4.845e-08	+-++++--+++++++???++++++++++	0.6781	37235
rs13414548	2	530290	t	c	0.0819	-0.0747	0.0137	4.905e-08	----------+--+--------------	0.2514	39724
rs13130484	4	45175691	t	c	0.44	0.0422	0.0077	4.928e-08	+++-++---+++++++?++++?++?+++	0.8289	37314
rs2613500	1	72819884	t	c	0.1736	-0.0544	0.01	4.956e-08	----+--+-+-------+-------+--	0.6397	39618
rs2613503	1	72839774	a	c	0.8253	0.0549	0.0101	5.036e-08	++++-++-+-+++++?+?+++++++-++	0.6537	38692.9
rs893770	2	24954954	t	g	0.2153	-0.0502	0.0092	5.06e-08	----+--+--+---++-++-+-+-----	0.3654	39618.1
rs1550383	2	24931288	c	g	0.7695	0.0502	0.0092	5.15e-08	++++-++-++-+++--?+-++?++?+++	0.5242	37210
rs7296975	12	50255165	a	g	0.4046	-0.0447	0.0082	5.179e-08	----------------?++-------+-	0.1693	38160.1
rs12967135	18	57849023	a	g	0.2274	0.0514	0.0094	5.27e-08	++++-++-++-+--+?+?-+-??+?+++	0.1024	36110
rs1013402	11	27712381	a	g	0.6926	-0.0456	0.0084	5.272e-08	-+-+--++-------???----------	0.4745	37235
rs34723450	1	72724409	a	c	0.8203	0.0541	0.01	5.423e-08	++++-++-++-++++?+?+++++++-++	0.7251	38692.9
rs12988548	2	25323083	a	t	0.7266	0.0477	0.0088	5.432e-08	++++++++++++-+++++++--++++++	0.9097	39618
rs62142355	2	24971119	a	t	0.2151	-0.0507	0.0093	5.453e-08	----+--+--+---++-++-+?--?---	0.3847	38668
rs6736819	2	527946	t	c	0.0824	-0.0752	0.0138	5.456e-08	----------+--+--------------	0.2834	39617.9
rs11783771	8	28091463	a	c	0.3152	0.0448	0.0082	5.464e-08	+++--++-+++++++++-+++-+-+-++	0.1171	39618.1
rs28406841	16	19934822	a	g	0.8142	0.0554	0.0102	5.498e-08	+++-+++-+++++++???-+++++-+++	0.7253	37234.9
rs55633509	2	25148620	a	t	0.8325	-0.0599	0.011	5.515e-08	---------+--++--?-----+-+---	0.08199	38160
rs1460940	1	72814617	a	g	0.8229	0.0546	0.0101	5.523e-08	++++-++-+-+++++++-+++?++?-++	0.6054	38668.1
rs7488343	12	49689597	c	g	0.2772	0.0478	0.0088	5.531e-08	++++++--++-+-++-?--+-+++-+++	0.3918	38160
rs1009388	2	25391101	c	g	0.2576	0.0494	0.0091	5.551e-08	+--+++++++-+--++?++++++-++++	0.3781	38160
rs13410997	2	25433439	a	g	0.2013	-0.0529	0.0097	5.572e-08	---------+--+++-?----?--?---	0.7331	37210
rs72769575	16	19843517	t	c	0.8741	0.0623	0.0115	5.634e-08	+++-+++-++++-++?+?+++-++-+++	0.8589	38693
rs11641786	16	19844865	t	g	0.1257	-0.0624	0.0115	5.642e-08	---+---+----+--?-?---+--+---	0.8493	38693
rs4780829	16	19855985	a	g	0.1267	-0.0623	0.0115	5.651e-08	---+---+----+--?-?---+--+---	0.8655	38693
rs934778	2	25389224	a	g	0.7123	-0.0456	0.0084	5.681e-08	--+-------+-++---+----------	0.4656	39722
rs11030121	11	27736207	t	c	0.3111	0.0455	0.0084	5.801e-08	+-++++--+++++++???++++++++++	0.678	37235
rs17309930	11	27748493	a	c	0.2045	0.0516	0.0095	5.818e-08	+-++++--++++++++?-++++++++++	0.9444	38160.1
rs35737697	8	28059813	t	c	0.5834	0.0419	0.0077	5.851e-08	+++--++-+++++++++-+-++++++++	0.9228	39618
rs1561288	2	25369002	t	c	0.2519	-0.0469	0.0087	5.921e-08	----+-+--+--+---------------	0.8193	39721
rs7107410	11	27551388	t	c	0.2183	0.0504	0.0093	5.925e-08	+-+-++-+++++-+-?+?-+-++++-++	0.09637	38692.9
rs7206790	16	53797908	c	g	0.5291	-0.0435	0.008	5.93e-08	----+++++-----+???---------0	0.07879	37235
rs1131924	11	27516789	t	c	0.709	-0.0505	0.0093	6.046e-08	-+-+--+-----+---?-+-+----+--	0.1748	38160.1
rs115319174	2	207066474	c	g	0.0526	0.0983	0.0181	6.048e-08	+-++++--++-+-+++++++--+++++-	0.1758	39618
rs7127239	11	27547379	a	c	0.2187	0.0502	0.0093	6.134e-08	+-+-++-+++++-+-?+?++-++++-++	0.08414	38693
rs527065	1	177868882	t	g	0.3184	0.0442	0.0082	6.136e-08	+-+-+++-++-+-++?+?++++-+++++	0.09324	38693
rs2076885	2	25000901	a	g	0.2462	-0.0487	0.009	6.161e-08	----+--+--+---+-?++-+-+-----	0.3155	38160
rs112893582	12	49703983	a	c	0.7986	-0.0519	0.0096	6.172e-08	------++--+--+-+-++-+-------	0.6671	39618
rs12419462	11	27623309	a	g	0.2202	0.05	0.0092	6.243e-08	+-++++-+++++-+-?+?-+-++++-++	0.08572	38693.1
rs72769573	16	19841876	c	g	0.1262	-0.062	0.0115	6.442e-08	---+---+----+--?-?---+--+---	0.8558	38692.9
rs12957347	18	57751014	t	c	0.7617	-0.0504	0.0093	6.478e-08	-?-??--+--+-+--+----+??-?--+	0.009594	35672
rs34893777	18	57905216	a	t	0.7503	-0.0486	0.009	6.533e-08	-------+--+-++-???+-+-------	0.4797	37235
rs77207027	2	25097075	a	g	0.1081	0.0681	0.0126	6.568e-08	+++-++++---+--+-++++++++++++	0.2182	39618
rs12967878	18	57826570	t	c	0.7818	-0.0514	0.0095	6.644e-08	---++--+--+-++-+--+-+??-?---	0.09354	37035
rs7550711	1	110082886	t	c	0.0368	0.1178	0.0218	6.677e-08	+?++-++++-?+?+-+++-+++-+++++	0.4374	37860.9
rs719189	2	24875778	a	c	0.7881	0.0502	0.0093	6.686e-08	++++-++-++-+++--+--+-+-+++++	0.2013	39618.1
rs11642339	16	19832798	t	g	0.1259	-0.0616	0.0114	6.795e-08	---+---+----+--------+--+---	0.8958	39617.9
rs56239133	2	24987881	t	c	0.2173	-0.051	0.0095	6.843e-08	----+--+--+---++?++-+?--?---	0.3309	37210.1
rs113936771	1	110200152	a	g	0.9655	-0.122	0.0226	6.946e-08	----+----+----+---+---++----	0.2724	39618
rs56293917	2	24936417	a	g	0.7073	0.0461	0.0086	7.061e-08	++++-++--+-+++-+?-+++?++?+++	0.6483	37210.1
rs62142311	2	24864686	a	g	0.209	-0.0504	0.0094	7.144e-08	----+--++-+---++-++-+-+-----	0.1926	39618
rs8083289	18	57893618	c	g	0.75	-0.0476	0.0088	7.174e-08	-------+--+-++-?-?+-+-------	0.5081	38693
rs13250569	8	28058645	a	g	0.5831	0.042	0.0078	7.223e-08	+++--++-+++++++++-+-++++++++	0.9363	39618
rs11647020	16	53823990	t	c	0.5172	0.0423	0.0079	7.248e-08	+-++-+---+-+++++?--++?++?+++	0.2044	37210
rs61765646	1	72723211	a	t	0.1796	-0.0542	0.0101	7.402e-08	----+--+--+----?-?---?--?+--	0.6908	37742.9
rs62025051	16	19829999	a	g	0.1651	-0.0582	0.0108	7.566e-08	-------+----++-???---?--?---	0.4118	36284.9
rs12361806	11	27619569	a	g	0.2195	0.0497	0.0093	7.672e-08	+-++++-+++++-+-?+?-+-++++-++	0.07739	38693.1
rs4409780	11	27532234	t	c	0.2184	0.0493	0.0092	7.711e-08	+-+-++-+++++-+-+++++-++++-++	0.1598	39617.9
rs6718083	2	25362194	a	g	0.2509	-0.0472	0.0088	7.87e-08	----+-+--+--+---------------	0.8108	39618
rs6484314	11	27550199	a	g	0.2184	0.0498	0.0093	7.963e-08	+-+-++-+++++-+-?+?++-++++-++	0.101	38693
rs9886614	8	28099667	c	g	0.6763	-0.0436	0.0081	7.988e-08	---++--+---------+---+-+-+--	0.1049	39618
rs73112143	12	49691250	a	g	0.7886	-0.0515	0.0096	8.058e-08	------++--+-----?+--+-------	0.5558	38160.1
rs6760328	2	25077991	t	c	0.6951	-0.0442	0.0082	8.076e-08	----+-------+-+-?+---++-+---	0.1933	38265
rs591120	1	177902753	c	g	0.4367	0.0427	0.008	8.103e-08	+++??+++++?+?++?+?+++-++++--	0.4846	36581
rs12964203	18	57903604	t	c	0.7511	-0.0476	0.0089	8.13e-08	-------+--+-++-???+-+-------	0.4578	37341
rs34274959	1	72686292	a	g	0.8147	0.0529	0.0099	8.176e-08	++++-+--+--++++?+?+++-+-+-++	0.4829	38693
rs115454275	1	110192045	t	c	0.0347	0.1166	0.0217	8.183e-08	++++-++++-++++-+++-+++-+++++	0.234	39617.9
rs61742688	16	19883364	a	g	0.1304	-0.0625	0.0116	8.227e-08	-?-??--+----+--?-?---+--+---	0.6225	37252
rs115067791	2	207033306	a	g	0.0526	0.096	0.0179	8.235e-08	+-++++--++-+-+++++-+--++-++-	0.2749	39618
rs6745938	2	527972	t	c	0.9219	0.0762	0.0142	8.345e-08	++++++++++-++-++++++++++++++	0.2171	39617.9
rs9926784	16	19941968	t	c	0.8127	0.0545	0.0102	8.398e-08	+++-+++-+++++++???++++++-+++	0.804	37235
rs35476226	18	57885593	c	g	0.7491	-0.0473	0.0088	8.431e-08	-------+--+-++-?-?+-+-------	0.5154	38692.9
rs9886609	8	28099383	a	c	0.3229	0.0435	0.0081	8.533e-08	+++--++-+++++++++-+++-+-+-++	0.08834	39618
rs1038660	11	27549392	a	c	0.2185	0.0496	0.0093	8.722e-08	+-+-++-+++++-+-?+?++-++++-++	0.1027	38693
rs17791703	2	24881271	t	c	0.7849	0.0492	0.0092	8.738e-08	++++-++-++-+++--+--+-+-+++++	0.2087	39618
rs9886492	8	28099770	a	g	0.676	-0.0434	0.0081	8.751e-08	---++--+---------+---+-+-+--	0.1173	39618
rs1873078	11	27548003	c	g	0.2185	0.0496	0.0093	8.766e-08	+-+-++-+++++-+-?+?++-++++-++	0.1026	38693
rs12970134	18	57884750	a	g	0.251	0.0484	0.0091	8.804e-08	+?+??++-++?+?-+?+?-+-+++++++	0.314	36143
rs17735622	2	24907098	c	g	0.215	-0.0493	0.0092	8.89e-08	----+--+--+---++-++-+-+-----	0.2133	39618
rs11674421	2	24906195	c	g	0.2149	-0.0493	0.0092	8.895e-08	----+--+--+---++-++-+-+-----	0.2104	39617.9
rs13401689	2	24971338	a	g	0.215	-0.0502	0.0094	8.956e-08	----+--+--+---++?++-+-------	0.4534	38159.9
rs55803937	2	24981763	a	g	0.7822	0.0505	0.0094	9.063e-08	++++-++-++-+++--?--+-?++?+++	0.331	37210.1
rs836959	12	50275137	a	c	0.2892	-0.0436	0.0082	9.136e-08	--+---------+-+-----------+-	0.07299	39721
rs143328507	2	24971480	c	g	0.2143	-0.0502	0.0094	9.162e-08	----+--+--+---++?++-+-------	0.4626	38160.1
rs10835197	11	27607543	t	c	0.2197	0.0494	0.0092	9.168e-08	+-++++-+++++-+-?+?-+-++++-++	0.06204	38693
rs12725081	1	72682718	a	t	0.1855	-0.0526	0.0098	9.249e-08	----+-++-++----?-?---+-+-+--	0.5014	38693
rs2614115	8	28108344	a	t	0.3203	0.044	0.0082	9.296e-08	+++--++-+++++++++-+++++-+-++	0.1051	39618
rs7008686	8	28098720	a	g	0.5905	-0.0424	0.0079	9.306e-08	---++--+--------?+-----+-+--	0.1406	38160
rs55797001	2	24980582	a	t	0.7852	0.0501	0.0094	9.393e-08	++++-++-++-+++--?--+-+++++++	0.4685	38160
rs2614113	8	28106606	t	c	0.3275	0.0438	0.0082	9.421e-08	+++--++-+++++++++-+++?+-?-++	0.09811	38668
rs6996068	8	28094807	t	c	0.3229	0.0433	0.0081	9.449e-08	+++--++-+++++++++-+++-+-+-++	0.0927	39618.1
rs6719538	2	25149531	a	g	0.089	0.0751	0.0141	9.461e-08	+++-+++----+--+-+++++?-+?+++	0.5096	38668
rs112215462	2	25143408	c	g	0.1994	0.0532	0.01	9.466e-08	+++-+++-++++--++?+++-+-+-+++	0.05257	38159.9
rs7012040	8	28096371	t	c	0.3228	0.0433	0.0081	9.534e-08	+++--++-+++++++++-+++-+-+-++	0.09292	39618.1
rs12681090	8	28087891	t	c	0.6771	-0.0434	0.0081	9.559e-08	---++--+---------+---+-+-+--	0.09562	39618
rs7002331	8	28096888	t	c	0.677	-0.0433	0.0081	9.566e-08	---++--+---------+---+-+-+--	0.09424	39618
rs7125904	11	27543003	t	g	0.2186	0.0495	0.0093	9.573e-08	+-+-++-+++++-+-?+?++-++++-++	0.09925	38693
rs10112778	8	28095291	a	g	0.3229	0.0433	0.0081	9.587e-08	+++--++-+++++++++-+++-+-+-++	0.09312	39618.1
rs7010836	8	28096383	a	g	0.3251	0.0427	0.008	9.592e-08	+++--++-+++++++++-+++-+-+-++	0.1083	39719
rs10099875	8	28095050	a	c	0.6771	-0.0433	0.0081	9.601e-08	---++--+---------+---+-+-+--	0.09306	39618.1
rs2614114	8	28106784	t	c	0.3303	0.043	0.0081	9.607e-08	+++--++-+++++++++-+++?+-?-++	0.1166	38775
rs7816330	8	28093152	t	g	0.3229	0.0433	0.0081	9.616e-08	+++--++-+++++++++-+++-+-+-++	0.09414	39618
rs2282288	1	177892552	a	g	0.3587	-0.0424	0.0079	9.672e-08	-+-+------+----?-?+---+-----	0.7486	38693.1
rs12549755	8	28089596	t	c	0.6772	-0.0434	0.0081	9.732e-08	---++--+---------+---+-+-+--	0.09407	39618
rs111854376	2	25439758	t	c	0.1975	-0.053	0.0099	9.752e-08	----+----+--+-+-?-----------	0.8087	38160
rs6484308	11	27521802	t	g	0.2176	0.0496	0.0093	9.909e-08	+-+-++-+++++-+-?+?++-++++-++	0.1367	38693
rs4923454	11	27594129	a	g	0.7802	-0.0493	0.0092	9.959e-08	-+----+-----+-+?-?+-+----+--	0.06627	38693
rs76533282	2	25089575	t	g	0.9137	-0.0741	0.0139	1.004e-07	---+-----++-?+-+------+-+---	0.1766	38561.9
rs10938397	4	45182527	a	g	0.5597	-0.043	0.0081	1.006e-07	-?-??-+++-?-?---?-------+---	0.7628	35505
rs2049045	11	27694241	c	g	0.1721	-0.0549	0.0103	1.015e-07	--------+++-++--?--++-------	0.3341	38159.9
rs12269837	11	27593570	a	g	0.7804	-0.0492	0.0092	1.016e-07	-+----+-----+-+?-?+-+----+--	0.06733	38693
rs6497416	16	19876145	t	c	0.127	-0.0611	0.0115	1.018e-07	---+---+----+--?-?---+--+---	0.711	38692.9
rs57241318	12	49713839	t	c	0.2349	0.0486	0.0091	1.025e-07	++++-+--++-+-++++-++-+++-+++	0.6297	39618.1
rs13387998	2	512327	t	c	0.0782	-0.0759	0.0143	1.032e-07	------------++----+-------+-	0.1948	39618
rs34472009	1	177835638	t	c	0.1896	0.0517	0.0097	1.035e-07	+++-+++-++++-++++++-++-++--+	0.1503	39618
rs62142310	2	24862242	a	c	0.7898	0.0492	0.0092	1.043e-07	++++-++-++-+++--+--+-+-+++++	0.2222	39618
rs11665563	18	57876034	t	c	0.2507	0.0469	0.0088	1.046e-07	+++++++-++-+--+?+?-+-+++++++	0.5519	38693
rs57703366	2	25364914	a	g	0.3077	0.0441	0.0083	1.047e-07	++++++++++-++-+++-++++++++++	0.7207	39618
rs2352802	11	27547826	a	g	0.7823	-0.0493	0.0093	1.048e-07	-+-+--+-----+-+?-?--+----+--	0.1023	38693
rs4665764	2	25357487	c	g	0.2501	-0.0469	0.0088	1.05e-07	----+-+--+--+---------------	0.8538	39618
rs749046	2	24815624	a	g	0.7946	0.05	0.0094	1.05e-07	++++-++--+-+++--+--+-+-+++++	0.2531	39618
rs580294	1	177900616	t	c	0.5778	0.0401	0.0075	1.053e-07	+-+-++++++-+-+++++++++-+++++	0.5157	39721
rs7556799	2	522593	a	g	0.084	-0.0731	0.0137	1.059e-07	----------+--+------------+-	0.3468	39618
rs7575791	2	522601	t	c	0.916	0.0731	0.0137	1.059e-07	++++++++++-++-++++++++++++-+	0.3468	39618
rs925946	11	27667202	t	g	0.3044	0.0448	0.0084	1.06e-07	+?+??+--++?+?++?-?++++++++++	0.3537	36144
rs60423777	2	25357237	t	c	0.2502	-0.0469	0.0088	1.068e-07	----+-+--+--+---------------	0.856	39618
rs13393059	2	25376025	t	c	0.308	0.0441	0.0083	1.077e-07	++++++++++-++-++--++++++++++	0.7255	39618.1
rs11075987	16	53815161	t	g	0.5028	-0.043	0.0081	1.084e-07	-?-??-+++-?-?-+???+----+----	0.0341	34580
rs10767645	11	27544739	t	g	0.2178	0.0493	0.0093	1.089e-07	+-+-++-+++++-+-?+?++-++++-++	0.09988	38693
rs12678500	8	28088201	t	c	0.3226	0.0432	0.0081	1.105e-07	+++--++-+++++++++-+++-+-+-++	0.09749	39617.9
rs34940719	1	72693786	a	g	0.1865	-0.0522	0.0098	1.115e-07	----+-++-++----?-?---+-+-+--	0.4341	38693.1
rs4665766	2	25366130	a	t	0.7499	0.0467	0.0088	1.12e-07	++++-+-++-++-+++++++++++++++	0.8146	39617.9
rs656384	18	57906500	a	g	0.2531	0.0478	0.009	1.122e-07	+++++++-++-+--+-?+-+-?++?+++	0.4003	37210.1
rs11894404	2	24918283	a	g	0.2114	-0.0492	0.0093	1.152e-07	----+--+--+---++-++-+-+-----	0.2649	39617.9
rs621391	12	50288615	c	g	0.5133	0.0426	0.008	1.162e-07	++-+-+++++++-++???-++-++-+-+	0.08959	37235
rs17066564	18	57750897	t	c	0.7589	-0.0491	0.0093	1.186e-07	-------+--+-++-?-?--+??-?--+	0.05458	36109.9
rs66463418	16	19978804	a	g	0.2229	-0.0519	0.0098	1.201e-07	---+---+-+--+--???------+---	0.547	37235
rs1858601	1	72674434	t	g	0.1872	-0.0526	0.0099	1.201e-07	----+-++-++----?-?---?-+?+--	0.4872	37743
rs184033703	2	206956138	a	g	0.0549	0.0912	0.0172	1.217e-07	+-++++--++++-+++++-+--++-++-	0.1674	39618
rs73910206	2	523461	a	g	0.9157	0.0725	0.0137	1.228e-07	++++++++++-++-++++++++++++-+	0.3306	39618
rs17066562	18	57749028	a	g	0.7588	-0.0491	0.0093	1.23e-07	-------+--+-++-?-?--+??-?--+	0.05553	36110
rs56120127	16	19977851	t	g	0.7762	0.0518	0.0098	1.232e-07	+++-+++-+-++-++???++++++-+++	0.548	37234.9
rs4299252	18	57751185	a	t	0.7566	-0.049	0.0093	1.238e-07	-------+--+-++-?-?--+??-?--+	0.05437	36110
rs447016	12	50277399	a	c	0.2913	-0.0437	0.0083	1.239e-07	--+---------+-+---+-------+-	0.08322	39618
rs7240566	18	57744189	a	g	0.7583	-0.0491	0.0093	1.243e-07	-------+--+-++-?-?--+??-?--+	0.05214	36110.1
rs688671	18	57867526	a	g	0.7415	-0.0466	0.0088	1.244e-07	-------+--+-++-?-?+-+-------	0.4549	38693
rs11892647	2	25379019	t	c	0.3081	0.0439	0.0083	1.244e-07	++++++++++-++-++--++++++++++	0.7333	39617.9
rs11215427	11	115093438	c	g	0.2613	-0.0461	0.0087	1.245e-07	-----+-------+--?+--+-------	0.2929	38160
rs77014480	2	25371332	t	c	0.251	-0.0466	0.0088	1.26e-07	----+-+--+--+---------------	0.82	39617.9
rs35166058	1	72702806	a	g	0.186	-0.0515	0.0098	1.263e-07	----+-++-++------+---+-+-+--	0.5108	39617.9
rs4665768	2	25372229	a	c	0.252	-0.0464	0.0088	1.264e-07	----+-+--+--+---------------	0.8182	39618
rs62140560	2	25008278	t	c	0.2147	-0.0497	0.0094	1.267e-07	----+--+--+---++?++-+-------	0.5831	38160
rs6545812	2	25129385	a	g	0.0953	0.0719	0.0136	1.269e-07	+++-++++---+--+-++++++-+-+++	0.286	39618
rs11648188	16	19978039	t	c	0.2226	-0.0518	0.0098	1.281e-07	---+---+-+--+--???------+---	0.5593	37235
rs57324979	2	25007318	a	g	0.2154	-0.0497	0.0094	1.29e-07	----+--+--+---++?++-+-------	0.5847	38160
rs56215558	2	25105736	c	g	0.0843	0.0734	0.0139	1.292e-07	+++-+++++--+--+-++++++-+-+++	0.241	39618
rs11692059	2	24852874	a	g	0.2104	-0.0488	0.0092	1.306e-07	----+--+--+---++-++-+-+-----	0.2179	39618
rs8091524	18	57751960	t	c	0.7624	-0.049	0.0093	1.314e-07	-------+--+-++-?-?--+??-?--+	0.07185	36110
rs59117299	2	25140389	t	c	0.0889	0.0731	0.0138	1.322e-07	+++-++++---+--+-++++++-+-+++	0.5269	39618
rs57457259	2	25378422	t	c	0.3081	0.0438	0.0083	1.324e-07	++++++++++-++-++--++++++++++	0.7367	39618
rs423934	12	50277412	t	c	0.291	-0.0438	0.0083	1.333e-07	--+---------+-+---+-------+-	0.07972	39618
rs141029407	2	25112701	a	g	0.0844	0.0739	0.014	1.345e-07	+++-++++---+--+-++++++-+-+++	0.2526	39618.1
rs6567154	18	57754901	t	c	0.2433	0.0489	0.0093	1.357e-07	+++++++-++-+--+?+?++-??+?++-	0.05357	36110
rs190572876	2	206972042	a	g	0.0524	0.0952	0.0181	1.358e-07	+-++++--++++-+++++-+--++-++-	0.2414	39618
rs78989253	2	25137784	c	g	0.9109	-0.0729	0.0138	1.364e-07	---+----+++-++-+------+-+---	0.5525	39618
rs55985335	2	25092226	a	g	0.9146	-0.0726	0.0138	1.366e-07	---+-----++-++-+------+-+---	0.191	39618
rs2070760	12	49690337	t	c	0.7883	-0.0524	0.0099	1.367e-07	------++--+--?--?+--+?--?---	0.6293	35635
rs12954782	18	57864092	c	g	0.7479	-0.0466	0.0088	1.367e-07	-------+--+-++-?-?+-+-------	0.5478	38692.9
rs1561289	2	25369040	t	c	0.2533	-0.0461	0.0087	1.37e-07	----+-+--+--+--------?--?---	0.7479	38775
rs10098959	8	28100307	a	c	0.6757	-0.0432	0.0082	1.371e-07	---++--+---------+---?-+?+--	0.1116	38668
rs80083564	11	27733143	t	g	0.1171	0.0663	0.0126	1.374e-07	++++++-++++-+++???+++++++-+-	0.07384	37235
rs34110521	18	57780326	a	g	0.7647	-0.0491	0.0093	1.377e-07	-------+--+-+--?-?--+??-?--+	0.08584	36110
rs57794904	2	25346568	t	c	0.2244	-0.0486	0.0092	1.396e-07	------+--+------------------	0.9808	39618
rs74624011	2	25044100	t	c	0.0791	0.0739	0.014	1.399e-07	+++-+++-+-+---+-++++++-+++++	0.197	39618
rs75698381	2	25143873	a	g	0.0852	0.074	0.0141	1.4e-07	+++-++++---+--+-++++++-+-+++	0.4273	39618
rs1814391	2	25047484	a	g	0.0791	0.0739	0.014	1.415e-07	+++-+++-+-+---+-++++++-+++++	0.2054	39618.1
rs55784418	2	25139230	a	g	0.9146	-0.0738	0.014	1.42e-07	---+----+++-++-+------+-+---	0.4271	39618
rs80306571	2	25094075	a	g	0.0854	0.0724	0.0138	1.428e-07	+++-+++++--+--+-++++++-+-+++	0.1915	39618
rs34289700	1	72660048	a	c	0.8135	0.0514	0.0098	1.446e-07	++++-+--+--++++?+?+++-+-+-++	0.4844	38693
rs79451155	2	25096506	t	c	0.0854	0.0724	0.0138	1.446e-07	+++-+++++--+--+-++++++-+-+++	0.1923	39618
rs35918659	18	57761524	t	c	0.2355	0.0499	0.0095	1.465e-07	+++++++-++-+--+?+?++-??+?++-	0.06106	36110
rs72852524	2	25346687	a	t	0.7756	0.0485	0.0092	1.487e-07	++++++-++-++++++++++++++++++	0.9809	39618
rs56003423	2	25102600	t	c	0.0853	0.0723	0.0138	1.496e-07	+++-+++++--+--+-++++++-+-+++	0.214	39617.9
rs55649310	2	24833463	t	g	0.7899	0.0486	0.0092	1.502e-07	++++-++--+-+++--+--+-+-+++++	0.1992	39618
rs3731633	2	25366380	a	t	0.2494	-0.0464	0.0088	1.507e-07	----+-+--+--+---------------	0.81	39618
rs2276597	2	25344464	a	g	0.2244	-0.0485	0.0092	1.529e-07	------+--+------------------	0.9789	39618.1
rs62140836	2	24709032	a	g	0.2091	-0.0489	0.0093	1.546e-07	----+--++-+---++-++-+-+-----	0.1532	39617.9
rs34319362	8	28058078	a	g	0.4176	-0.0411	0.0078	1.549e-07	---++--+---------+-+--------	0.9298	39618
rs56157935	2	25090375	t	c	0.9143	-0.0722	0.0138	1.562e-07	---+-----++-++-+------+-+---	0.1907	39618
rs1519480	11	27675712	t	c	0.678	-0.0423	0.0081	1.567e-07	-+-+--++--------+-----------	0.5973	39618
rs34840702	1	72662959	t	c	0.1867	-0.0513	0.0098	1.59e-07	----+-++-++----?-?---+-+-+--	0.4738	38693
rs684227	1	177901741	a	g	0.4646	-0.0396	0.0076	1.59e-07	---------------+-----++---+-	0.6377	39618
rs61765640	1	72684333	a	g	0.1883	-0.0514	0.0098	1.6e-07	----+-++-++----?-?---+-+-+--	0.4403	38693
rs17800401	2	25104931	c	g	0.0853	0.072	0.0137	1.603e-07	+++-+++++--+--+-++++++-+-+++	0.2219	39618.1
rs138964083	2	206908054	t	c	0.0541	0.0908	0.0173	1.614e-07	+-++++--++++--++++-+--++-++-	0.1801	39618
rs138095446	2	25053019	c	g	0.9213	-0.0739	0.0141	1.621e-07	---+---+-+-+++-+------+-----	0.21	39618
rs11125733	2	24871798	a	g	0.7905	0.0489	0.0093	1.634e-07	++++-++-++-+++--+--+-+-+++++	0.2553	39618.1
rs35483896	1	72695431	t	g	0.1858	-0.051	0.0097	1.635e-07	----+-++-++------+---+-+-+--	0.4921	39618
rs7124442	11	27677041	t	c	0.6854	-0.0424	0.0081	1.646e-07	-+-+--++--------+-----------	0.586	39618
rs7599796	2	25110222	t	c	0.9058	-0.0705	0.0135	1.649e-07	---+----+++-++-+------+-+---	0.2169	39618.1
rs7817972	8	28093589	a	c	0.3242	0.0429	0.0082	1.651e-07	+++--++-+++++++++-+++?+-?-++	0.1147	38668
rs2236746	12	49691567	t	c	0.8138	-0.0514	0.0098	1.66e-07	------++--+--+-+-++-+-------	0.5512	39618
rs10913461	1	177887117	c	g	0.3845	0.0404	0.0077	1.665e-07	+-+-+++-++-+-++++--+++-+-+++	0.4243	39618
rs183235241	2	206915620	a	g	0.0307	0.1385	0.0265	1.671e-07	+-++++-+++++--++++++--++-+++	0.2282	39618
rs7518576	1	177849963	t	c	0.6197	-0.0413	0.0079	1.693e-07	-+-+---+--+-+--?-?+---+-+---	0.3462	38693.1
rs62144583	2	25003478	c	g	0.7818	0.0495	0.0095	1.701e-07	++++-++-++-+++--?--+-?-+?+++	0.4343	37209.9
rs7596747	2	25350321	t	g	0.2244	-0.0482	0.0092	1.706e-07	------+--+------------------	0.9846	39618
rs115583825	2	25052582	t	c	0.0793	0.0737	0.0141	1.709e-07	+++-+++-+-+---+-++++++-+++++	0.2412	39618
rs4936323	11	115091119	t	g	0.7387	0.0456	0.0087	1.714e-07	+++++-+++++++-++?-++-+++++++	0.325	38159.9
rs9692849	8	28088887	a	g	0.3218	0.043	0.0082	1.727e-07	+++--++-+++++++++-+++?+-?-++	0.1119	38668.1
rs17792389	2	24924438	a	c	0.7875	0.0484	0.0093	1.735e-07	++++-++-++-+++--+--+-+-+++++	0.3099	39618
rs4665285	2	25381470	c	g	0.2277	-0.0477	0.0091	1.736e-07	----+-+--+------------------	0.9089	39618
rs2083116	2	25347469	t	c	0.2241	-0.0482	0.0092	1.736e-07	------+--++-----------------	0.9817	39618.1
rs55722016	2	24874883	a	t	0.7904	0.0487	0.0093	1.752e-07	++++-++-++-+++--+--+-+-+++++	0.2579	39618
rs7975431	12	49706839	a	g	0.8018	-0.0505	0.0097	1.771e-07	------++--+--+-+-++-+-------	0.6866	39618
rs62142346	2	24912506	a	c	0.2113	-0.0485	0.0093	1.781e-07	----+--++-+---++-++-+-+-----	0.2253	39618.1
rs2457463	10	70315687	t	g	0.9617	-0.187	0.0358	1.794e-07	?--??---??--?-???---++-+----	0.4942	25485
rs35944729	1	72666431	a	t	0.813	0.0512	0.0098	1.8e-07	++++-+--+--++++?+?+++-+-+-++	0.4578	38693
rs41281519	2	25065274	t	g	0.9184	-0.0732	0.014	1.834e-07	---+---+-+---+-+------+-----	0.1834	39618.1
rs17792437	2	24927765	a	c	0.7872	0.0483	0.0093	1.837e-07	++++-++-++-+++--+--+-+-+++++	0.317	39618
rs13135092	4	103198082	a	g	0.9263	-0.0876	0.0168	1.851e-07	-------+--++----?-+--+------	0.3328	38160.1
rs61732745	2	25141434	a	g	0.0908	0.0719	0.0138	1.868e-07	+++-++++---+--+-++++++-+-+++	0.5488	39618
rs75973443	2	25108124	t	c	0.0848	0.0717	0.0138	1.872e-07	+++-+++++--+--+-++++++-+-+++	0.2454	39617.9
rs138166226	2	25107616	a	g	0.0848	0.0717	0.0138	1.895e-07	+++-+++++--+--+-++++++-+-+++	0.2467	39617.9
rs76087690	2	25065799	a	g	0.0816	0.0731	0.014	1.895e-07	+++-+++-+-+++-+-++++++-+++++	0.1817	39618.1
rs9699942	1	72681835	a	g	0.1861	-0.0506	0.0097	1.951e-07	----+-++-++------+---+-+-+--	0.5061	39618
rs6712986	2	25126046	t	c	0.8868	-0.0665	0.0128	1.977e-07	--------+++-++-+-----?--?---	0.3607	38667.9
rs28543370	12	49694534	a	g	0.8128	-0.0505	0.0097	2.006e-07	------++--+--+-+-++-+-------	0.6683	39618
rs744078	2	24934842	a	c	0.785	0.0479	0.0092	2.018e-07	++++-++-++-+++--+--+-+-+++++	0.3574	39618
rs62142344	2	24912056	t	c	0.2127	-0.0481	0.0092	2.027e-07	----+--+--+---++-++-+-+-----	0.2885	39617.9
rs13391139	2	521279	a	g	0.0848	-0.0711	0.0137	2.046e-07	----------+--+------------+-	0.3776	39617.9
rs2903485	2	520929	a	g	0.0849	-0.0711	0.0137	2.066e-07	----------+--+------------+-	0.3776	39618
rs12313435	12	49705577	a	c	0.8024	-0.0503	0.0097	2.074e-07	------++--+--+-+-++-+-------	0.6836	39618
rs2044148	2	24737833	a	g	0.211	-0.0473	0.0091	2.079e-07	----+--++-+---++-++-+-+-----	0.1843	39721
rs7127507	11	27714884	t	c	0.6793	-0.0431	0.0083	2.086e-07	-+-+--++-------???----------	0.5291	37235
rs12304800	12	49703850	t	c	0.8028	-0.0502	0.0097	2.106e-07	------++--+--+-+-++-+-------	0.7078	39618
rs8223	1	177897959	t	c	0.4211	-0.0396	0.0076	2.126e-07	-+-+------+-+---------+-----	0.5447	39618
rs13406109	2	520542	t	c	0.9152	0.071	0.0137	2.127e-07	++++++++++-++-++++++++++++-+	0.3761	39618
rs6710503	2	24971176	a	g	0.267	-0.0451	0.0087	2.145e-07	----+-++--+---+-?+--+-+-+---	0.4824	38160.1
rs113581509	1	110187031	t	c	0.0351	0.1113	0.0215	2.148e-07	++++-++++-++++-+++-+++-+++++	0.2935	39618
rs79988608	2	25058941	a	g	0.0814	0.0726	0.014	2.149e-07	+++-+++++-+++-+-++++++-+++++	0.1917	39618
rs117281273	8	42981400	c	g	0.9688	0.1284	0.0248	2.172e-07	+-++++++++++++?-+--+++++-+++	0.7387	37850.9
rs11865086	16	30130493	a	c	0.4701	-0.0393	0.0076	2.228e-07	---+------+-------+-----+-+-	0.6409	39722
rs13003881	2	25352091	a	g	0.2241	-0.0478	0.0092	2.23e-07	------+--+--+---------------	0.9791	39618.1
rs12786130	11	27505954	t	c	0.7715	-0.0462	0.0089	2.283e-07	-+-+--+-----+-----+-+----+--	0.2989	39720
rs1808124	11	27686904	t	c	0.3415	0.0427	0.0083	2.287e-07	+-+-++--++++++++?+++-+++++++	0.5299	38160
rs145484204	2	25053066	t	c	0.9216	-0.0732	0.0141	2.299e-07	---+---+-+-+++-+------+-----	0.2195	39618
rs59615345	2	24778897	a	g	0.21	-0.0478	0.0093	2.311e-07	----+--++-+---++-++-+-+-----	0.1824	39618
rs10767658	11	27672252	c	g	0.3034	0.0426	0.0082	2.354e-07	+-+-++--++++-++?-?++++++++++	0.4433	38693
rs11693687	2	24902072	a	g	0.7874	0.0478	0.0092	2.355e-07	++++-++-++-+++--+--+-+-+++++	0.2544	39618
rs77760734	2	25059745	t	g	0.9186	-0.0724	0.014	2.367e-07	---+---+-+---+-+------+-----	0.2089	39618
rs76979480	2	24795883	t	c	0.7898	0.0478	0.0092	2.4e-07	++++-++--+-+++--+--+-+-+++++	0.1779	39618.1
rs6746786	2	500367	t	c	0.0849	-0.0724	0.014	2.406e-07	----------+--+----+--+----+-	0.4639	39618
rs62142285	2	24793097	a	g	0.7898	0.0477	0.0092	2.412e-07	++++-++--+-+++--+--+-+-+++++	0.178	39618
rs28857010	12	49694387	a	g	0.1878	0.05	0.0097	2.414e-07	++++++--++-++-+-+--+-+++++++	0.6759	39617.9
rs4142027	1	177833576	t	c	0.1831	0.0515	0.01	2.416e-07	+++-+++-++++-++?+?+-++--+--+	0.04285	38693
rs6663622	1	177867608	a	g	0.6153	-0.0403	0.0078	2.445e-07	-+-+---+--+-+--?-?+---+-+---	0.4061	38693
rs11648621	16	19973008	a	g	0.7809	0.0513	0.0099	2.459e-07	+++-+++-+-++-++???+++?++?+++	0.5956	36285
rs11691065	2	24765479	a	g	0.7904	0.0477	0.0092	2.469e-07	++++-++--+-+++--+--+-+-+++++	0.1828	39618
rs112365800	2	25084013	a	g	0.0879	0.0706	0.0137	2.478e-07	+++-+++++--+--+-++++++-+-+++	0.2371	39618
rs12317532	12	49694784	c	g	0.8115	-0.0497	0.0096	2.478e-07	------++--+--+-+-++-+-------	0.6759	39618
rs62142274	2	24764393	a	c	0.2095	-0.0477	0.0092	2.479e-07	----+--++-+---++-++-+-+-----	0.1819	39618
rs10157480	1	177873333	a	g	0.3824	0.0397	0.0077	2.5e-07	+-+-+++-++-+-++?+?-+++---+++	0.4211	38798
rs62142284	2	24790666	a	g	0.7904	0.0477	0.0093	2.501e-07	++++-++--+-+++--+--+-+-+++++	0.1869	39618
rs2014182	2	25347908	t	c	0.2251	-0.0481	0.0093	2.506e-07	------+--+-----------?--?---	0.9616	38668
rs116762317	2	25086133	a	g	0.9127	-0.0706	0.0137	2.522e-07	---+-----++-++-+------+-+---	0.2157	39617.9
rs1415084	1	177870257	a	t	0.6181	-0.0403	0.0078	2.533e-07	-+-+---+--+-+--?-?+---+-+---	0.4402	38693.1
rs142767588	2	24758386	a	g	0.2094	-0.0477	0.0093	2.546e-07	----+--++-+---++-++-+-+-----	0.1859	39617.9
rs77605687	2	25085887	a	g	0.0873	0.0706	0.0137	2.551e-07	+++-+++++--+--+-++++++-+-+++	0.2154	39618
rs141837986	2	206974754	a	g	0.0536	0.0924	0.0179	2.555e-07	+-++++--++-+-++++--+--++-++-	0.1465	39618
rs74370213	2	25098374	a	c	0.9113	-0.0706	0.0137	2.557e-07	---+-----++-++-+------+-+---	0.162	39618
rs75239292	2	25086314	t	g	0.0873	0.0706	0.0137	2.561e-07	+++-+++++--+--+-++++++-+-+++	0.2163	39618
rs11682506	2	24728141	t	c	0.2104	-0.0478	0.0093	2.563e-07	----+--++-+---++-++-+-+-----	0.1954	39618
rs62142275	2	24767649	a	c	0.7905	0.0477	0.0092	2.572e-07	++++-++--+-+++--+--+-+-+++++	0.1824	39618
rs147165897	12	49704706	a	g	0.8061	-0.0504	0.0098	2.572e-07	------++--+--+-+-++-+-------	0.5646	39618
rs10798577	1	177853220	c	g	0.3828	0.0404	0.0078	2.578e-07	+-+-+++-++-+-++?+?-+++-+-+++	0.434	38693
rs11125673	2	24782836	a	g	0.2095	-0.0476	0.0092	2.587e-07	----+--++-+---++-++-+-+-----	0.1871	39618
rs11646715	16	53824007	a	g	0.5196	0.0408	0.0079	2.592e-07	+-++-+---+-+++++?+-++?++?+++	0.2787	37210
rs11904717	2	24762457	t	c	0.7905	0.0476	0.0092	2.592e-07	++++-++--+-+++--+--+-+-+++++	0.1824	39618.1
rs13036110	2	25350017	t	c	0.2219	-0.0478	0.0093	2.61e-07	------+--+--+---------------	0.9827	39618
rs17734407	2	24730581	a	g	0.7904	0.0477	0.0093	2.613e-07	++++-++--+-+++--+--+-+-+++++	0.1776	39617.9
rs139647585	2	24756060	c	g	0.2095	-0.0476	0.0092	2.634e-07	----+--++-+---++-++-+-+-----	0.184	39617.9
rs60372293	2	24779230	t	g	0.7904	0.0476	0.0093	2.647e-07	++++-++--+-+++--+--+-+-+++++	0.1867	39618
rs7564851	2	615658	a	g	0.3899	-0.0406	0.0079	2.65e-07	-+-------+--+-------+??-?-+-	0.6697	37139
rs62140850	2	24746900	a	g	0.7905	0.0476	0.0092	2.686e-07	++++-++--+-+++--+--+-+-+++++	0.183	39617.9
rs7560005	2	618361	a	g	0.6175	0.0435	0.0085	2.687e-07	+-++++++++++-++???++-??+?+-+	0.8399	34652
rs62140845	2	24735623	a	g	0.7904	0.0476	0.0092	2.687e-07	++++-++--+-+++--+--+-+-+++++	0.1831	39617.9
rs62140849	2	24746198	a	g	0.2095	-0.0476	0.0092	2.688e-07	----+--++-+---++-++-+-+-----	0.183	39617.9
rs11890406	2	24778227	a	g	0.7904	0.0476	0.0093	2.704e-07	++++-++--+-+++--+--+-+-+++++	0.1837	39618
rs61117682	2	25076404	t	c	0.3285	0.0423	0.0082	2.706e-07	++++-+++++++-+-+?---+-++-+++	0.165	38160.1
rs62140848	2	24741143	a	c	0.7904	0.0475	0.0092	2.706e-07	++++-++--+-+++--+--+-+-+++++	0.1829	39618
rs11125632	2	24737412	t	c	0.2095	-0.0475	0.0092	2.711e-07	----+--++-+---++-++-+-+-----	0.1828	39617.9
rs11895918	2	24743472	c	g	0.2095	-0.0475	0.0092	2.716e-07	----+--++-+---++-++-+-+-----	0.1828	39618
rs116493845	2	25075591	a	g	0.0858	0.0711	0.0138	2.719e-07	+++-+++++--+--+-++++++-+-+++	0.1829	39618
rs62142283	2	24787912	t	c	0.2102	-0.0476	0.0093	2.746e-07	----+--++-+---++-++---+-----	0.2092	39618.1
rs111678442	12	49703955	a	g	0.1952	0.05	0.0097	2.75e-07	++++++--++-++-+-+--+-+++++++	0.6924	39618
rs35215534	1	177830626	a	g	0.1826	0.0512	0.01	2.787e-07	+++-+++-++++-++?+?+-++--+--+	0.04349	38693
rs6545953	2	25343468	a	g	0.2522	-0.0463	0.009	2.826e-07	---------+--+-----------+---	0.8609	39618
rs11895626	2	24892032	t	c	0.7876	0.0474	0.0092	2.837e-07	++++-++-++-+++--+--+-+-+++++	0.2454	39618
rs77994977	2	25082207	a	g	0.0876	0.0703	0.0137	2.841e-07	+++-+++++--+--+-++++++-+-+++	0.2081	39618.1
rs12749133	1	177857302	t	c	0.3827	0.0402	0.0078	2.873e-07	+-+-+++-++-+-++?+?-+++-+-+++	0.4587	38693
rs2165740	2	24727019	c	g	0.2098	-0.0476	0.0093	2.876e-07	----+--++-+---++-++-+-+-----	0.1848	39617.9
rs77575852	2	25084303	a	t	0.0874	0.0703	0.0137	2.91e-07	+++-+++++--+--+-++++++-+-+++	0.2132	39618
rs7542	16	30125840	c	g	0.4707	-0.0396	0.0077	2.965e-07	---++-----+-------+-----+-+-	0.7126	39618
rs6692651	1	177854399	a	g	0.3825	0.0402	0.0078	2.973e-07	+-+-+++-++-+-++?+?-+++-+-+++	0.4652	38693
rs11168936	12	49645240	t	c	0.6264	-0.0415	0.0081	2.984e-07	----+-++--+---?-?-+---------	0.06488	36486
rs10913454	1	177852789	a	c	0.618	-0.0402	0.0078	2.997e-07	-+-+---+--+-+--?-?+---+-+---	0.4539	38693
rs1336785	1	177859642	c	g	0.611	-0.0401	0.0078	3.019e-07	-+-+---+----+--?-?+---+++-+-	0.4479	38693.1
rs77225428	2	25083645	a	g	0.9126	-0.0701	0.0137	3.024e-07	---+-----++-++-+------+-+---	0.2124	39618
rs45593334	11	115089440	a	c	0.741	0.0441	0.0086	3.035e-07	+++++-+++++++-+++-++-+++++-+	0.4614	39618
rs4347344	11	27653138	a	g	0.6797	0.0437	0.0085	3.07e-07	+-++++++-+-++++-?+++-+++-+++	0.7105	38160.1
rs1571349	1	177866792	a	g	0.6149	-0.0396	0.0077	3.072e-07	-+-+---+--+-+----++---+-+---	0.4433	39618
rs74639823	2	25041007	t	g	0.9213	-0.0722	0.0141	3.082e-07	---+---+-+-+++-+------+-----	0.2087	39618
rs12787847	11	27506050	t	c	0.228	0.0463	0.0091	3.112e-07	+-+-++-+++++-+++++++-++++-++	0.3219	39617.9
rs4940927	18	57732689	a	g	0.2545	0.046	0.009	3.124e-07	+++++++--+-++++?+?++-??+?+++	0.2741	36212
rs77969210	2	25117540	t	c	0.9195	-0.0738	0.0144	3.138e-07	---+-----++-++-+------+-+---	0.2512	39618
rs13416069	2	25008266	t	c	0.2162	-0.0486	0.0095	3.163e-07	----+--+--+---++?++-+?--?---	0.514	37210
rs56139148	2	24973767	a	t	0.6646	0.0417	0.0082	3.167e-07	+++++++--+-+-++-?--+++-+-+++	0.2874	38160
rs62107261	2	422144	t	c	0.9516	0.1175	0.023	3.17e-07	+-++-+++-?-+-+?-?+-+++++++++	0.5756	36074.1
rs35984555	8	42966262	t	c	0.0385	-0.1136	0.0222	3.182e-07	-+------------?+--+-----+---	0.7614	37851
rs80078501	2	25200871	a	g	0.0837	0.0751	0.0147	3.184e-07	+++-+++++--+--+-?+++++-+-+++	0.3185	38160
rs150175599	2	207468007	t	c	0.0394	0.1065	0.0208	3.19e-07	+-+--++-++++--+-++++++++++++	0.6796	39618
rs10767659	11	27686196	t	g	0.6712	-0.0411	0.008	3.215e-07	-+-+--++--------+-----------	0.5048	39618
rs10202934	2	25359254	t	c	0.2731	-0.0447	0.0088	3.238e-07	---------++---------+?-+?---	0.9439	38668.1
rs28798494	12	49694277	t	c	0.8136	-0.0498	0.0097	3.293e-07	------++--+--+-+-++-+-------	0.6725	39618.1
rs117049232	12	50272063	c	g	0.3137	-0.0432	0.0085	3.308e-07	--+---------+-+-?-+-------+-	0.08796	38160
rs56001375	2	24850724	a	t	0.7892	0.0476	0.0093	3.326e-07	++++-++-++-+++--+--+-?-+?+++	0.1998	38668
rs7605927	2	25375905	c	g	0.7312	0.0443	0.0087	3.375e-07	++++-+-++-+--+++++++++++++++	0.644	39618
rs56383418	2	24849053	a	g	0.7892	0.0476	0.0093	3.398e-07	++++-++-++-+++--+--+-?-+?+++	0.2027	38668
rs17734306	2	24722438	a	g	0.7665	0.0448	0.0088	3.424e-07	++++-+---+-+++--+-++++-+++++	0.3852	39723
rs10798579	1	177860331	a	g	0.6177	-0.0399	0.0078	3.451e-07	-+-+---+--+-+--?-?+---+-+---	0.4407	38693
rs143223375	2	207434727	c	g	0.9605	-0.1061	0.0208	3.455e-07	-+-+---+----++-+------------	0.6419	39618.1
rs148734301	2	25034310	t	c	0.0854	0.0702	0.0138	3.467e-07	+++-+++-+++-----++++++-+++++	0.1444	39618
rs383307	12	50277129	t	g	0.2931	-0.0424	0.0083	3.502e-07	--+---------+-+?-?+-------+-	0.06081	38693
rs6545758	2	25074874	t	c	0.6836	-0.0424	0.0083	3.523e-07	----+-------+-+-?+-+-++-+---	0.2031	38160
rs13410506	2	25023031	a	g	0.3748	-0.041	0.0081	3.528e-07	-+---++++-+----+?-+---------	0.5754	38160
rs10798576	1	177853043	t	g	0.618	-0.0399	0.0078	3.532e-07	-+-+---+--+-+--?-?+---+-+---	0.482	38693
rs11588039	1	177812740	t	c	0.8186	-0.0498	0.0098	3.565e-07	---+---+----+------++-++-++-	0.06031	39618
rs7342318	12	49692639	t	c	0.1879	0.0493	0.0097	3.565e-07	++++++--++-++-+-+--+-+++++++	0.6666	39618.1
rs11215424	11	115087421	a	g	0.7392	0.0445	0.0087	3.594e-07	+++++-+++++++-+-?-++-+++++++	0.4468	38160
rs56336001	2	25014607	t	c	0.0788	0.0717	0.0141	3.604e-07	+++-+++-+-+---+-++++++-+++++	0.2086	39618
rs13393590	2	25147676	t	c	0.79	-0.0488	0.0096	3.611e-07	---+---+----++--?--++-+-+---	0.03149	38160
rs77966139	2	25081711	t	c	0.0874	0.0696	0.0137	3.65e-07	+++-+++++--+--+-++++++-+-+++	0.1956	39618.1
rs2119115	2	24886781	a	c	0.7605	0.0443	0.0087	3.653e-07	++++-++-++-+++--+-++-+-+++++	0.4036	39724
rs112630077	2	25082548	t	c	0.0874	0.0696	0.0137	3.681e-07	+++-+++++--+--+-++++++-+-+++	0.1917	39618
rs74377248	2	25082338	a	c	0.0874	0.0696	0.0137	3.722e-07	+++-+++++--+--+-++++++-+-+++	0.1934	39618.1
rs55951414	2	25079601	a	g	0.0874	0.0696	0.0137	3.734e-07	+++-+++++--+--+-++++++-+-+++	0.1999	39618
rs12507026	4	45181334	a	t	0.5599	-0.0403	0.0079	3.735e-07	---+--+++------???---?--?---	0.9248	36284.9
rs10188516	2	25368005	a	g	0.2681	-0.0442	0.0087	3.752e-07	----+-+--+-++---------------	0.5937	39618
rs61455481	12	49701111	a	g	0.196	0.0493	0.0097	3.771e-07	++++++--++-++-+-+--+-+++++++	0.7061	39617.9
rs80332495	5	19191677	a	g	0.9418	0.1124	0.0221	3.782e-07	+++--++?++++++?+++++-+++++-+	0.863	37707
rs6545954	2	25343469	t	c	0.2518	-0.0459	0.009	3.807e-07	---------+--+-------+---+---	0.8682	39618
rs72792190	2	25051727	a	g	0.8511	-0.0542	0.0107	3.831e-07	-+-+---+-+----++------------	0.6093	39618
rs6497407	16	19832032	t	g	0.7191	0.0437	0.0086	3.861e-07	+++-++++++++-++-+++++-++++++	0.5741	39618.1
rs62140842	2	24732961	t	c	0.2103	-0.0469	0.0092	3.889e-07	----+--++-+---++-++-+-+-----	0.2248	39618
rs17799872	2	25044957	a	g	0.0788	0.0704	0.0139	3.921e-07	+++-+++-+-+---+-++++++-+++++	0.1095	39722
rs7719067	5	153538241	a	g	0.4261	0.0381	0.0075	3.957e-07	+++++++--+++++++-+++++++++-+	0.7659	39721
rs7708584	5	153543466	a	g	0.425	0.0385	0.0076	3.978e-07	+++++++--+++++++-+++++++++-+	0.7766	39618
rs28599560	5	91791853	a	g	0.6124	0.0403	0.008	3.991e-07	++++-++-++++?++-+--+++++++++	0.7667	38562
rs4310564	11	27652858	c	g	0.6955	0.0432	0.0085	4.03e-07	++++++++---++-+-?++-++++-+++	0.6955	38160
rs12790913	11	27511998	a	g	0.2277	0.0463	0.0091	4.042e-07	+-+-++-+++++-++++?-+-++++-++	0.1959	39067
rs4569924	5	153540025	t	c	0.4256	0.0385	0.0076	4.046e-07	+++++++--+++++++-+++++++++-+	0.7643	39618
rs56397001	2	24974223	a	g	0.0812	0.0708	0.014	4.07e-07	+++-+++-+-+-+---++++++-+++++	0.08645	39618
rs9966951	18	57775295	a	g	0.3108	0.0409	0.0081	4.081e-07	+++++++--+-+-++-++++-+++++-+	0.3378	39724
rs34333163	4	103283117	a	g	0.931	-0.0812	0.016	4.088e-07	---+---+--+-----+-+--+--+---	0.478	39618
rs146823532	1	74979126	a	g	0.9665	0.1406	0.0278	4.091e-07	+++-+++++?++++?+?-?-++++++-+	0.7306	35822
rs13114738	4	103284865	t	c	0.0738	0.0775	0.0153	4.132e-07	+++-+++++--+++++-+-+--++-+++	0.6921	39723
rs663640	18	57846077	t	c	0.2054	0.0479	0.0095	4.139e-07	+++--++--+-+--+-++-+-+++++++	0.14	39618
rs11030112	11	27705188	a	g	0.3059	0.0413	0.0082	4.159e-07	+-+-++--++++-+++-+++++++++++	0.3465	39618
rs9954728	18	57801557	c	g	0.6823	-0.0415	0.0082	4.244e-07	----+--+--+-+--+----+-------	0.3205	39618
rs10835201	11	27618265	a	g	0.7677	-0.0452	0.0089	4.259e-07	-+----+-----+-+?-?+-+----+--	0.09725	38798
rs10938398	4	45186139	a	g	0.4376	0.0398	0.0079	4.31e-07	+++-++---++++++???++++++-+++	0.937	37234.9
rs73146351	2	544577	a	g	0.0832	-0.0715	0.0141	4.321e-07	----------+--+-?-?----------	0.4958	38693
rs2278486	2	25057298	c	g	0.7674	0.0479	0.0095	4.335e-07	+-+++++--+-+-+-+?+-+++++-+++	0.7772	38160
rs11835037	12	49698435	t	c	0.1932	0.0482	0.0095	4.358e-07	++++++--++-++-+-+--+-+++++++	0.6665	39618
rs1366219	5	153545698	a	t	0.4249	0.0385	0.0076	4.388e-07	++++-++--+++++++-+++++++++-+	0.7901	39618
rs192026888	2	25028416	a	g	0.0767	0.0727	0.0144	4.412e-07	+++-+++-+-+---+-++++++-+++++	0.2244	39618
rs113536429	12	49679178	c	g	0.2184	0.0478	0.0095	4.414e-07	++++++--++-++-++?--+-+++++++	0.4805	38159.9
rs12315095	12	49698815	t	c	0.1928	0.0482	0.0096	4.477e-07	++++++--++-++-+-+--+-+++++++	0.6686	39618.1
rs36030660	18	57735945	t	c	0.7401	-0.0457	0.0091	4.49e-07	-------++-+-+--?-?--+??-?--+	0.2725	36110
rs11168967	12	49699652	a	g	0.1957	0.0474	0.0094	4.502e-07	++++++--++-++-+-+--+-+++++++	0.7529	39722
rs4940926	18	57732418	t	c	0.2522	0.047	0.0093	4.51e-07	+++++++-++-++-++?+++-??+?+++	0.1822	35577
rs6713532	2	25384833	t	c	0.7288	0.0438	0.0087	4.61e-07	++++-+-++-+--+++++++++++++++	0.706	39618
rs12956871	18	57897702	a	g	0.7502	-0.0456	0.009	4.621e-07	-------+--+-++-+--+-+??-?---	0.3543	37035
rs11676900	2	24895302	a	c	0.2115	-0.0471	0.0094	4.72e-07	----+--+--+---++-++-+?+-?---	0.2066	38667.9
rs4665784	2	25448197	a	g	0.2014	-0.0495	0.0098	4.732e-07	----+----+-++---?-----------	0.6808	38160
rs11030391	11	28644626	a	g	0.6292	0.0397	0.0079	4.732e-07	++++++--+-++-+++-+-++-++-+--	0.001233	39618
rs4922787	11	27507902	t	g	0.7722	-0.0455	0.009	4.755e-07	-+-+--+-----+--?-?--+----+--	0.2091	38798
rs1428120	5	153541904	t	g	0.5713	-0.0384	0.0076	4.779e-07	-------++-------+---------+-	0.7689	39618
rs7136538	12	49697252	a	g	0.1932	0.048	0.0095	4.828e-07	++++++--++-++-+-+--+-+++++++	0.6649	39618
rs7600421	2	25075876	t	g	0.6886	-0.0424	0.0084	4.862e-07	----+-------+-+-?+-+-++-+---	0.1343	38160
rs2099044	5	153548206	t	c	0.4253	0.0384	0.0076	4.875e-07	++++-++--+++++++-+++++++++-+	0.809	39618
rs61442874	2	207520920	a	t	0.7289	-0.0439	0.0087	4.883e-07	------++++--++-+?----+--+---	0.06628	38160
rs297937	12	50291735	c	g	0.5401	-0.0471	0.0094	4.917e-07	----+-+-+-----?-?++-----+---	0.133	36393.1
rs7294873	12	49697798	a	c	0.8066	-0.0479	0.0095	4.96e-07	------++--+--+-+-++-+-------	0.6728	39618
rs10767657	11	27668794	a	c	0.3764	0.0422	0.0084	4.986e-07	+-++++--++++-+++?++++++++-++	0.2149	38160
rs623479	1	177898799	t	c	0.5595	0.0381	0.0076	5.047e-07	+-++++++-+-+-++++++++--+++--	0.5511	39618
rs59617873	2	25023444	t	c	0.7881	0.0482	0.0096	5.088e-07	++++-++--+-+++--?+-+++++++++	0.9066	38160.1
rs17734264	2	24719710	t	c	0.233	-0.0448	0.0089	5.091e-07	----+-+++-+---++-+----+-----	0.3538	39617.9
rs55820598	2	25067294	t	c	0.9095	-0.069	0.0137	5.103e-07	---+---+++-+-+-+------+-----	0.1039	39618
rs4640343	2	24956027	a	c	0.9175	-0.07	0.0139	5.115e-07	---+---+-+-+-+++------+-----	0.09419	39618
rs7715256	5	153537893	t	g	0.5735	-0.0382	0.0076	5.133e-07	-------++-------+---------+-	0.7383	39618
rs56045417	2	24892768	a	g	0.7883	0.0469	0.0093	5.197e-07	++++-++-++-+++--+--+-?-+?+++	0.2008	38668.1
rs1248264	12	50271045	t	g	0.7089	0.0423	0.0084	5.204e-07	++-+++++++++-+-+?+++++++-+-+	0.05984	38160.1
rs6720514	2	24826619	t	c	0.765	0.044	0.0088	5.223e-07	++++-++--+-+++--+-++0+-+++++	0.3717	39725
rs12315130	12	49698738	a	g	0.1926	0.0479	0.0096	5.286e-07	++++++--++-++-+-+--+-+++++++	0.6831	39618
rs11125735	2	24875403	a	g	0.2103	-0.0472	0.0094	5.296e-07	----+--+--+---++-++-+?+-?---	0.2296	38668
rs61023481	12	49698953	a	c	0.1926	0.0479	0.0096	5.303e-07	++++++--++-++-+-+--+-+++++++	0.6582	39618
rs7295247	12	49697873	a	g	0.1948	0.047	0.0094	5.304e-07	++++++--++-++++-+--+-+++++++	0.6822	39723
rs4958702	5	153544512	t	c	0.4271	0.0384	0.0077	5.348e-07	+++++++--+++++++-+++++++++-+	0.8257	39618
rs12731430	1	177809120	a	c	0.8174	-0.049	0.0098	5.354e-07	-+-+---+----+------++-++-++-	0.07417	39618.1
rs10835360	11	28606699	t	c	0.6268	0.0396	0.0079	5.363e-07	++++++--++++-+++-+-++-++-+--	0.03956	39618
rs11030075	11	27627296	c	g	0.7681	-0.0455	0.0091	5.387e-07	-+----+-----+-+?-?+-+----+--	0.1003	38693
rs561634	1	177895763	a	t	0.4396	-0.0384	0.0077	5.388e-07	-+------+-+-+--?-?----+---++	0.4587	38693.1
rs10044136	5	153546808	c	g	0.5728	-0.0382	0.0076	5.393e-07	----+--++-------+---------+-	0.7717	39618
rs7232835	18	57769718	t	c	0.3149	0.0408	0.0082	5.472e-07	++++-++-++-+-++-++++-+++++++	0.3486	39617.9
rs11664369	18	57739072	t	c	0.255	0.0456	0.0091	5.496e-07	+++++++--+-+-++?+?++-??+?++-	0.3053	36110
rs2590943	1	72874456	a	g	0.1786	-0.0487	0.0097	5.499e-07	----+--+-+-----+--+--+-+----	0.8602	39722
rs7564400	2	25349059	t	c	0.2654	-0.0439	0.0088	5.526e-07	------+--+--+-----------+---	0.8682	39618
rs59911983	2	25023442	a	g	0.2114	-0.0485	0.0097	5.535e-07	----+--++-+---++?++---------	0.8798	38160
rs836963	12	50270331	t	g	0.3731	-0.0436	0.0087	5.541e-07	---------+--+-+-?-+-----+-+-	0.5782	38160.1
rs13109272	4	103292422	t	c	0.9304	-0.08	0.016	5.564e-07	---+---+--+-----+-+--+--+---	0.3497	39618
rs925494	4	45187622	t	c	0.4152	0.0423	0.0085	5.589e-07	++++++---+++-+++?-++++++-+++	0.9272	38159.9
rs13403386	2	24723109	c	g	0.7674	0.0446	0.0089	5.613e-07	++++-+---+-+++--+-++++-+++++	0.3651	39618
rs74528305	2	25066379	t	g	0.9175	-0.0699	0.014	5.616e-07	---+---+-+---+-+------+-----	0.1513	39618
rs59009734	16	19830457	a	g	0.1683	-0.0535	0.0107	5.626e-07	-------+----++-+?+---?--?---	0.1786	37210
rs75367830	2	25086725	t	c	0.0853	0.0698	0.014	5.639e-07	+++-+++++--+--+-+++++?-+?+++	0.2227	38668
rs56191263	2	24843330	a	g	0.2329	-0.0446	0.0089	5.716e-07	----+--++-+---++-+--0-+-----	0.3844	39618
rs1942879	18	57788990	t	g	0.6848	-0.0407	0.0082	5.773e-07	----+--+--+-+--+----+-------	0.3637	39618
rs75512388	5	153546492	a	g	0.5676	-0.0387	0.0077	5.781e-07	-------++---?---+---------+-	0.8458	38562
rs6937930	6	55207924	c	g	0.6046	-0.04	0.008	5.784e-07	----+---+------+?-+--?--?+--	0.8016	37210
rs9296780	6	55212064	a	g	0.6061	-0.0401	0.008	5.822e-07	-+--+---+------+?-+--?--?+--	0.826	37210
rs1428121	5	153547495	a	t	0.5725	-0.0381	0.0076	5.97e-07	----+--++-------+---------+-	0.775	39618.1
rs11663816	18	57876227	t	c	0.748	-0.045	0.009	5.985e-07	-------+--+-++-+--+-+??-?---	0.3017	37035
rs13143234	4	103287131	a	g	0.0743	0.0768	0.0154	6.016e-07	+++-+++++--+++++-+-+--++-+++	0.7064	39618
rs55771305	2	24926413	a	t	0.9754	-0.1425	0.0286	6.067e-07	-+-------?-+-+++--------+---	0.047	39299
rs590215	18	57904088	t	c	0.2517	0.0459	0.0092	6.074e-07	+++++++-++-+--+-?+-+-??+?+++	0.3415	35577
rs6713448	2	25055446	t	g	0.8506	-0.0536	0.0107	6.08e-07	-+-+---+-+----++------------	0.6183	39618
rs1248263	12	50271372	t	g	0.7091	0.0421	0.0084	6.081e-07	++-+++++++++-+-+?+++++++-+-+	0.05787	38160
rs2045439	18	57883801	t	c	0.2505	0.045	0.009	6.1e-07	+++++++-++-+--+-++-+-??+?+++	0.3558	37035.1
rs79990615	2	25071787	c	g	0.0828	0.0699	0.014	6.18e-07	+++-+++-+-++--+-++++++-+++++	0.1347	39618
rs892511	1	110078255	c	g	0.9656	-0.1083	0.0217	6.185e-07	-+--+----+----+--++--++-+---	0.5729	39618
rs56188174	2	24840900	t	g	0.2352	-0.0444	0.0089	6.188e-07	----+-+++-+---++-+--+-+-----	0.3403	39618
rs13135688	4	103285906	c	g	0.0744	0.0766	0.0154	6.214e-07	+++-+++++--+++++-+-+--++-+++	0.7076	39618
rs72887113	6	50889791	a	g	0.098	0.0648	0.013	6.227e-07	++++++-++--+---?+?-+++++++++	0.2872	38693.1
rs6900362	6	55212833	t	g	0.3975	0.0395	0.0079	6.23e-07	++++-+++-++++++-?+-+++++--++	0.8461	38160
rs12736514	1	177802424	t	c	0.8116	-0.048	0.0096	6.293e-07	-+-+---+----+------++-+--++-	0.1725	39617.9
rs143367187	2	25027622	c	g	0.8513	-0.053	0.0106	6.346e-07	-+-+---+-+----++------------	0.5407	39618
rs6545952	2	25343374	a	g	0.7406	0.0448	0.009	6.347e-07	++++++-++-++-++++++++?++?+++	0.9177	38668
rs17734650	2	24812163	a	g	0.789	0.0465	0.0093	6.364e-07	++++-++--+-+++--+--+-?-+?+++	0.1561	38668
rs12760319	1	177804191	a	g	0.1883	0.0479	0.0096	6.373e-07	+-+-+++-++++-++++++--+-++--+	0.1705	39617.9
rs144361191	2	25026369	a	g	0.8513	-0.053	0.0106	6.375e-07	-+-+---+-+----++------------	0.5504	39618
rs13390269	2	25068793	a	g	0.0828	0.0695	0.014	6.429e-07	+++-+++-+-+++-+-++++++-+++++	0.1411	39618
rs4303677	2	25221440	t	c	0.0845	0.0731	0.0147	6.445e-07	+++-+++++--+--+-?+++++-+-+++	0.3535	38160
rs113939247	2	25029179	a	g	0.1486	0.053	0.0107	6.448e-07	+-+-+++-+-++++--++++++++++++	0.5293	39618
rs55914216	2	25012072	a	g	0.149	0.053	0.0107	6.516e-07	+-+-+++-+-+++---++++++++++++	0.5335	39618
rs7577562	2	25348492	a	g	0.7328	0.0436	0.0088	6.606e-07	++++++-++--+-+++++++++++-+++	0.8653	39618
rs1336980	9	129377855	c	g	0.3635	0.0395	0.0079	6.608e-07	++++++++++-+--+-+++++?++?-++	0.7825	38668
rs7757288	6	55205502	a	g	0.6087	-0.0398	0.008	6.64e-07	-+--+---+------+?-+--?--?+--	0.7495	37210
rs13114461	4	103284697	t	c	0.0743	0.0765	0.0154	6.648e-07	+++-+++++--+++++-+-+--++-+++	0.7117	39618
rs116742388	2	24911514	a	g	0.7864	0.0463	0.0093	6.757e-07	++++-++-++-+++--+--+-?-+?+++	0.2489	38667.9
rs7342384	12	49692487	t	g	0.8105	-0.0482	0.0097	6.806e-07	------++--+--+-+-++-+-------	0.6338	39618
rs12475496	2	434668	a	g	0.3673	0.0402	0.0081	6.825e-07	+-+-+++++--+++++?++++++-+-++	0.08441	38160
rs6497396	16	19735697	t	c	0.8223	0.0513	0.0103	6.839e-07	++++++++++++--+?+?+-+?++?+++	0.6123	37743
rs7566675	2	522197	t	c	0.084	-0.0697	0.014	6.923e-07	----------+--+-?-?---?--?-+-	0.3662	37743
rs7760903	6	55209763	t	c	0.3792	0.0401	0.0081	7.042e-07	+-++-+++-++++++-?+-++?++?-++	0.4467	37209.9
rs28823960	12	49694457	a	t	0.8168	-0.0488	0.0098	7.106e-07	------++--+--+-+-++-+-------	0.7732	39618.1
rs2099598	2	25347046	t	c	0.7565	0.0454	0.0092	7.111e-07	++++++-++-++-+++++++-?++?+++	0.8031	38668.1
rs72769541	16	19777197	a	t	0.8246	0.0514	0.0104	7.117e-07	++++++++++++--+?+?+-+?++?+++	0.5281	37743
rs8087080	18	57791081	t	g	0.3162	0.0404	0.0082	7.12e-07	++++-++-++-+-++-++++-+++++++	0.3636	39618
rs62140846	2	24739350	c	g	0.7643	0.0441	0.0089	7.128e-07	++++-++--+-+++--+-++++-+++++	0.3942	39618.1
rs7572475	2	24893059	a	t	0.7659	0.0441	0.0089	7.161e-07	++++-++--+-+++--+-++-+-+++++	0.4128	39618
rs4898516	12	49699268	a	g	0.8126	-0.0481	0.0097	7.171e-07	------++--+--+-+-++-+-------	0.7653	39617.9
rs9961032	18	57788448	t	c	0.6856	-0.0405	0.0082	7.183e-07	-------+--+-+--+----+-------	0.3922	39618
rs7337284	13	54066314	t	c	0.271	0.0427	0.0086	7.187e-07	++++++-+-+++++--++++++-+++++	0.06358	39618
rs2083115	2	25347391	t	c	0.7542	0.0465	0.0094	7.31e-07	++++++-+++++-+++?+++-?++?+++	0.8714	37210
rs10734393	11	27557090	a	g	0.2732	0.0446	0.009	7.351e-07	+-++++--+++--+++?+-+-++++-++	0.01685	38159.9
rs62142286	2	24793703	a	g	0.7891	0.0462	0.0093	7.354e-07	++++-++--+-+++--+--+-?-+?+++	0.157	38668.1
rs13428821	2	25067876	t	c	0.9139	-0.0688	0.0139	7.356e-07	---+---+++---+-+------+-----	0.1283	39618
rs80122249	2	25011663	a	g	0.9186	-0.0687	0.0139	7.376e-07	---+---+-+-+-+-+------+-----	0.09277	39618
rs34303244	2	25348608	c	g	0.7104	0.044	0.0089	7.415e-07	++++++-+++++-+++?+++-+++-+++	0.7274	38160
rs58748031	2	516075	a	g	0.9165	0.0687	0.0139	7.447e-07	++++++++++-++-++++-+++++++-+	0.435	39618
rs626976	1	177899562	t	c	0.5611	0.0379	0.0077	7.495e-07	+-++++++-+-+-++?+?+++--+++--	0.3768	38693
rs11682031	2	24754442	a	g	0.7897	0.0462	0.0093	7.497e-07	++++-++--+-+++--+--+-?-+?+++	0.1584	38668
rs62142282	2	24780953	t	c	0.2102	-0.0462	0.0093	7.498e-07	----+--++-+---++-++-+?+-?---	0.1609	38668.1
rs11865189	16	19854259	a	t	0.7315	0.0431	0.0087	7.597e-07	+++-++++++++-+-?+?+++-++++++	0.4873	38693
rs11030382	11	28604477	t	c	0.3741	-0.039	0.0079	7.611e-07	------++----+---+-+--+--+-++	0.03347	39618
rs12577586	11	27600435	t	c	0.7684	-0.0449	0.0091	7.631e-07	-+----+-----+-+?-?+-+----+--	0.09126	38693
rs1599337	1	72846460	c	g	0.1807	-0.0494	0.01	7.652e-07	----+--+-------+--+--?-+?---	0.8784	38668
rs17790970	2	24735089	a	g	0.2103	-0.0461	0.0093	7.671e-07	----+--++-+---++-++-+?+-?---	0.1557	38667.9
rs62142276	2	24771048	t	c	0.2102	-0.0461	0.0093	7.679e-07	----+--++-+---++-++-+?+-?---	0.1536	38668
rs6545729	2	25014764	a	g	0.6356	0.0395	0.008	7.731e-07	+-++++-+++-+++--?+-+++++++++	0.6202	38160
rs10180231	2	25368030	t	c	0.7301	0.0433	0.0088	7.732e-07	++++-+-++-+--++++++++?++?+++	0.5005	38668
rs112670086	11	28644425	t	g	0.3562	-0.0405	0.0082	7.824e-07	------++-+--+---?-+--+--+-++	0.001302	38160
rs7928142	11	28668657	t	c	0.6456	0.0403	0.0082	7.887e-07	++++++--++++-+++?+-++-++-+--	0.002774	38160
rs4787493	16	30139900	t	g	0.6472	0.0404	0.0082	7.91e-07	+++-++-+++-++-++++++++++-+-+	0.6469	39618
rs13213670	6	55207304	a	c	0.3985	0.039	0.0079	7.924e-07	++++-+++-++++++-?+-+++++--++	0.8058	38160
rs10448285	9	129397014	t	c	0.352	0.0393	0.008	7.924e-07	++++++++++-++-+-+++++-++--++	0.8719	39618
rs7737449	5	91777343	t	c	0.6321	0.039	0.0079	7.944e-07	+++++++-++++-++-+-++++++++++	0.476	39618
rs11684913	2	24826852	a	c	0.7663	0.0439	0.0089	7.95e-07	++++-++--+-+++--+-++-+-+++++	0.367	39617.9
rs4732844	8	28104473	t	c	0.3727	-0.0385	0.0078	7.956e-07	---+++-----------+-------+--	0.8067	39618
rs72833479	17	45960449	a	g	0.2455	0.044	0.0089	7.957e-07	++++-+++++-+++++++++++++++++	0.9938	39618
rs7840565	8	28060783	a	g	0.5312	-0.0368	0.0075	8.071e-07	-+-+---+-+-------+-+--------	0.8182	39723
rs2635727	6	50820940	t	c	0.2582	-0.0421	0.0085	8.093e-07	----++------+---------------	0.6819	39722
rs66723169	18	57808978	a	c	0.2195	0.0477	0.0097	8.122e-07	+++--++-++-+--+?+?-+-??+?+++	0.1189	36110
rs4517468	11	27688286	a	t	0.3341	0.0397	0.0081	8.135e-07	+-+-++--++++++++--++++++++++	0.3422	39618.1
rs75503394	2	25155419	t	c	0.0887	0.0691	0.014	8.199e-07	+++-++++---+--+-++++++-+-+++	0.4448	39618
rs12735657	1	177809133	t	c	0.8091	-0.0473	0.0096	8.221e-07	-+-+---+----+------++-+--++-	0.2934	39618
rs1806822	2	25047632	t	c	0.0771	0.0713	0.0145	8.28e-07	+++-+++-+-+---+-+++++?-+?+++	0.2572	38668
rs35990565	8	28107815	t	c	0.3739	-0.0385	0.0078	8.316e-07	---+++-----------+-------+--	0.8075	39618
rs11647001	16	19771577	a	g	0.1685	-0.0506	0.0103	8.358e-07	-------+----++-?-?---+------	0.341	38693
rs114495854	2	25008196	c	g	0.9223	-0.0712	0.0145	8.48e-07	---+---+-+-+-+-+------+-----	0.05959	39618
rs11030108	11	27695464	a	g	0.3082	0.0394	0.008	8.504e-07	+-+-++--++++-+++-+++++++++++	0.4078	39725
rs11030393	11	28648737	a	g	0.6198	0.0377	0.0077	8.554e-07	++++++--++++-+++-+-++-++-+--	0.001416	39725
rs7136945	12	49697495	a	g	0.1887	0.0476	0.0097	8.629e-07	++++++--++-++-+-+--+-+++++++	0.752	39618
rs114518415	2	25007278	t	c	0.0777	0.0711	0.0145	8.744e-07	+++-+++-+-+-+-+-++++++-+++++	0.05928	39618
rs7128734	11	28603669	a	g	0.625	0.0388	0.0079	8.751e-07	++++++--++++-+++-+-++-++-+--	0.033	39618
rs10913445	1	177809560	c	g	0.191	0.0471	0.0096	8.849e-07	+-+-+++-++++-++++++--+-++--+	0.2959	39618
rs11684373	2	24699724	t	c	0.2045	-0.0473	0.0096	8.887e-07	----+--+--+---++-++-+?+-?---	0.1455	38668
rs10767646	11	27559744	t	c	0.2298	0.0449	0.0091	8.898e-07	+-+-++-+++++-+-?+?-+-++++-++	0.08832	38693
rs893771	2	24954778	a	g	0.2174	-0.0461	0.0094	8.906e-07	----+--+--+---++?++-+-+-----	0.3476	38160
rs4898519	12	49714103	a	g	0.8189	-0.0482	0.0098	8.994e-07	-------+--+-+----+--+-------	0.7161	39723
rs12085082	1	177802392	a	g	0.1911	0.0471	0.0096	9.049e-07	+-+-+++-++++-++++++-++-++--+	0.1771	39617.9
rs782218	1	72925397	c	g	0.1814	-0.0488	0.0099	9.08e-07	----+--+-+-----?-?+--+-+----	0.8056	38693.1
rs1320366	2	524173	c	g	0.9123	0.0686	0.014	9.109e-07	++++++++++-++-+?+?+++?++?+++	0.4506	37742.9
rs4760600	12	49314994	a	g	0.6123	0.0383	0.0078	9.165e-07	+++??--+++?+?+++++-+-+++-+++	0.6029	37612
rs17058753	8	28090914	t	c	0.6259	0.0382	0.0078	9.167e-07	+++---+++++++++++-++++++++++	0.8384	39618
rs7757498	6	55205679	a	g	0.6047	-0.0388	0.0079	9.183e-07	----+---+------+?-+--+--++--	0.826	38160
rs7701886	5	153547409	a	g	0.5513	-0.0377	0.0077	9.256e-07	----+--++-------+---+-----+-	0.8174	39618
rs6687024	1	72824860	t	c	0.6195	0.039	0.0079	9.294e-07	+++--++-++-++++?+?+-+++-+-++	0.3434	38693
rs10182036	2	25071835	a	g	0.0844	0.0685	0.014	9.366e-07	+++-+++---++--+-++++++-+++++	0.1482	39618
rs8044769	16	53839135	t	c	0.4862	-0.0375	0.0076	9.42e-07	----+++++---+-+???+----+---+	0.01607	37341
rs114907865	11	27690399	t	c	0.6616	-0.0394	0.008	9.608e-07	-+-+--++--------+-----------	0.4355	39617.9
rs10835368	11	28643299	t	c	0.3817	-0.0383	0.0078	9.637e-07	------++----+---+-+--+--+-++	0.001319	39618
rs62405419	6	50787459	t	g	0.1164	0.0604	0.0123	9.676e-07	++++-+-+++++--+++-+++?+-?+-+	0.1805	38667.9
rs71439149	2	25085200	a	g	0.0831	0.0696	0.0142	9.682e-07	+++-+++++--+--+-+++++?-+?+++	0.2453	38667.9
rs11215416	11	115077327	a	g	0.7496	0.0427	0.0087	9.734e-07	+++++-++++--+-++++++--++++++	0.1832	39618
rs3829849	9	129390800	t	c	0.3599	0.0381	0.0078	9.758e-07	++++++++++-+-++-++++++++--++	0.8098	39725
rs76078428	2	25044740	t	c	0.0787	0.0696	0.0142	9.759e-07	+++-+++-+-+---+-+++++?-+?+++	0.2878	38668
rs3748405	16	19870176	t	c	0.7317	0.0435	0.0089	9.771e-07	+++-++++++++-+-???+++-++++++	0.4316	37235
rs10495749	2	24730847	a	g	0.2329	-0.0436	0.0089	9.839e-07	----+--++-+---++-+----+-----	0.3436	39617.9
rs12735595	1	177793990	a	c	0.188	0.0471	0.0096	9.843e-07	+-+-+++-++++-++?+?+--+-++--+	0.1621	38798
rs7566416	2	25050977	t	c	0.3367	-0.0397	0.0081	9.901e-07	-+----+-+-+----+?-+---------	0.4045	38160
rs7342370	12	49694974	t	c	0.1835	0.0477	0.0097	9.933e-07	++++++--++-++-+-+--+-+++++++	0.5954	39618
rs3961049	2	442079	a	g	0.3665	0.0386	0.0079	9.977e-07	+-+--++++--++++++++++++-+-++	0.1209	39618
rs62496874	8	28091527	a	g	0.3732	-0.0381	0.0078	9.999e-07	---+++-----------+-------+--	0.8445	39617.9
rs62578127	9	129386860	t	c	0.3608	0.0385	0.0079	1.004e-06	++++++++++-+-++-+++++-++--++	0.823	39618
rs6497415	16	19876092	t	c	0.1825	-0.0501	0.0102	1.006e-06	---+---+-+--+--???---+--+---	0.7124	37235
rs934610	2	25047910	a	g	0.3366	-0.0396	0.0081	1.009e-06	-+----+-+-+----+?-+---------	0.4019	38160
rs77981750	2	25084918	t	c	0.0869	0.0679	0.0139	1.009e-06	+++-+++++--+--+-+++++?-+?+++	0.2749	38668
rs12730934	1	177817666	t	c	0.1824	0.0483	0.0099	1.018e-06	+++-+++-++++-++?+?+--+--+--+	0.05526	38693.1
rs4780822	16	19727998	a	g	0.8252	0.0501	0.0103	1.022e-06	+++++++-++++--+?+?+++-++-+++	0.317	38693
rs6484311	11	27531764	a	g	0.7823	-0.0465	0.0095	1.026e-06	-+-+--+-----+?+?-?--+----+--	0.09739	37118
rs80140483	2	24749597	a	t	0.233	-0.0435	0.0089	1.027e-06	----+-+++-+---++-+----+-----	0.3293	39617.9
rs1394186	16	19831476	a	g	0.7209	0.0431	0.0088	1.031e-06	+++-++++++++-++-?++++-++++++	0.5261	38160
rs7832318	8	28110414	a	g	0.6246	0.0383	0.0078	1.032e-06	+++---+++++++++++-+++++++-++	0.7722	39618
rs10987373	9	129379230	c	g	0.3647	0.0388	0.0079	1.034e-06	++++++++++-+--+-+++++?++?-++	0.8203	38668
rs13429256	2	512765	a	g	0.0863	-0.0675	0.0138	1.037e-06	----------+--+-?-?--------+-	0.5033	38693
rs62578126	9	129375338	t	c	0.3687	0.0384	0.0079	1.037e-06	++++++++++-+--+-++++++++--++	0.7955	39618
rs55822100	2	25012303	a	g	0.1468	0.0527	0.0108	1.039e-06	+-+-+++-+-+++--+++++++++++++	0.5596	39617.9
rs13416733	2	25056499	c	g	0.1475	0.0531	0.0109	1.059e-06	+-+-+++++-+++--++++++++++-++	0.5153	39618
rs144321338	2	24755363	t	g	0.7671	0.0434	0.0089	1.061e-06	++++-++--+-+++--+-++0+-+++++	0.3451	39617.9
rs75055234	2	24755948	t	c	0.2329	-0.0434	0.0089	1.062e-06	----+--++-+---++-+--0-+-----	0.3452	39617.9
rs6497409	16	19836346	c	g	0.2021	-0.0463	0.0095	1.065e-06	---+---+----+---------------	0.9727	39618
rs3963	6	55204017	t	c	0.396	0.0379	0.0078	1.067e-06	++++-+++-++++++-?+-+++++--++	0.7821	38266
rs79482748	2	25077978	a	c	0.9115	-0.0666	0.0136	1.069e-06	---+-----++-++-+------+-+---	0.3327	39618
rs4649955	1	72888654	t	c	0.1783	-0.048	0.0098	1.073e-06	----+--+-+-----+--+--+-+----	0.8604	39617.9
rs4923207	11	24757325	t	g	0.8052	0.0485	0.0099	1.074e-06	+-++++++++-+--+-?+++++++-+++	0.7589	38266
rs13404336	2	25384961	t	c	0.7518	0.0443	0.0091	1.086e-06	++++++-++-+--++++++++?++?+++	0.6207	38667.9
rs75697605	2	24766476	a	g	0.233	-0.0434	0.0089	1.092e-06	----+--++-+---++-+--0-+-----	0.345	39617.9
rs35926073	11	28644440	t	c	0.3611	-0.0398	0.0082	1.095e-06	------++-+--+---?-+--+--+-++	0.0009083	38160
rs2488376	13	54074415	t	c	0.2704	0.0413	0.0085	1.102e-06	++++++-+-+++++--++++++-+++++	0.03205	39715
rs1336783	1	177922471	a	c	0.2871	0.041	0.0084	1.106e-06	+++-++++++-+-++++-++-+--++-+	0.133	39618
rs9695734	9	96407983	t	c	0.1603	-0.0517	0.0106	1.115e-06	---??-+--+?-?-+---------+--+	0.5229	37506
rs12377624	9	129373110	c	g	0.3643	0.0383	0.0079	1.117e-06	++++++++++-+--+-+++++-++--++	0.8215	39618
rs190486227	12	50272606	t	c	0.8599	-0.0736	0.0151	1.122e-06	----+--+-?+-?-?-?++---+-+-+-	0.03885	35017.9
rs57357594	2	24757590	a	t	0.7683	0.0435	0.0089	1.126e-06	++++-++--+-+++--+-++++-+++++	0.3434	39618
rs8062735	16	19839538	t	c	0.2017	-0.0462	0.0095	1.136e-06	---+---+----+---------------	0.973	39618
rs62142278	2	24776522	t	g	0.233	-0.0433	0.0089	1.148e-06	----+--++-+---++-+--0-+-----	0.3473	39617.9
rs71480157	11	27610041	t	c	0.8229	0.0494	0.0102	1.149e-06	++++++++-+-+--++?++-++++++++	0.3858	38160
rs34133016	8	42718597	a	t	0.0406	-0.1016	0.0209	1.15e-06	-+------------++-+------+-+-	0.891	39618
rs34046390	8	42712654	c	g	0.9603	0.1018	0.0209	1.156e-06	+-++++++++++++--+-++++++-+-+	0.8993	39618
rs77777078	2	25078165	t	c	0.9161	-0.0689	0.0142	1.16e-06	---+-----++-++-+-----?+-?---	0.2194	38668
rs11608916	12	49303083	a	c	0.3796	-0.0379	0.0078	1.16e-06	----+++-----------+-----+---	0.3969	39618
rs1599339	1	72846190	a	g	0.1809	-0.0481	0.0099	1.167e-06	----+--+-+--------+--+-+----	0.8944	39618
rs10760442	9	129383900	a	g	0.3605	0.0383	0.0079	1.17e-06	++++++++++-+-++-+++++-++--++	0.8316	39618
rs11865403	16	19824493	c	g	0.1656	-0.0513	0.0106	1.172e-06	-------+----++-???-+-+------	0.1725	37234.9
rs113516984	17	45964442	t	c	0.7565	-0.0433	0.0089	1.18e-06	----+-----+-----------------	0.9915	39618.1
rs11030392	11	28648671	a	g	0.3808	-0.0377	0.0078	1.184e-06	------++----+---+-+--+--+-++	0.001393	39618
rs782240	1	72906385	a	g	0.1797	-0.0478	0.0098	1.188e-06	----+--+-+-----+--+--+-+----	0.8681	39618
rs7206184	16	19739002	c	g	0.8331	0.05	0.0103	1.19e-06	+++++++-++++--+?+?+++-++-+++	0.2806	38692.9
rs2902200	1	177806838	a	g	0.8114	-0.0467	0.0096	1.191e-06	-+-+---+----+--?-?-++-+--++-	0.1603	38798
rs10835378	11	28644716	a	g	0.6223	0.038	0.0078	1.194e-06	++++++--+-++-+++-+-++-++-+--	0.001394	39618
rs10835379	11	28644719	a	g	0.3777	-0.038	0.0078	1.194e-06	------++-+--+---+-+--+--+-++	0.001395	39618
rs10835380	11	28644729	a	g	0.6223	0.038	0.0078	1.195e-06	++++++--+-++-+++-+-++-++-+--	0.001394	39618
rs1373914	1	72901515	t	c	0.1797	-0.0477	0.0098	1.198e-06	----+--+-+-----+--+--+-+----	0.8678	39618
rs992956	1	72901141	t	g	0.8198	0.0482	0.0099	1.202e-06	++++-++-+-+++++?+?-++-+-++++	0.8086	38693
rs74580656	2	25451789	t	c	0.2238	0.0493	0.0102	1.209e-06	++-+++++++-+--+-?++++?++?+++	0.2705	37210
rs782257	1	72899059	a	g	0.1802	-0.0482	0.0099	1.211e-06	----+--+-+-----?-?+--+-+----	0.8084	38693
rs76259681	2	25082109	a	g	0.0866	0.0674	0.0139	1.212e-06	+++-+++++--+--+-+++++?-+?+++	0.2433	38668
rs6545884	2	25243469	a	t	0.7514	-0.0489	0.0101	1.227e-06	---------+--+---?-+--++--+--	0.5089	38160
rs112956320	2	442420	t	c	0.2897	0.0454	0.0094	1.233e-06	+-+--++++--+?+++?+-++++--+++	0.02635	37104
rs113187178	17	46117471	a	g	0.2198	0.0444	0.0092	1.233e-06	++++-+-+++-++++-++++++-++-++	0.8441	39618
rs78372398	2	25099494	a	g	0.1075	-0.0679	0.014	1.236e-06	------++--+----+?-+--?--?---	0.878	37210.1
rs11866391	16	19846324	t	c	0.7995	0.0466	0.0096	1.246e-06	+++-+++-++++-+++++++++++++++	0.9861	39618.1
rs1893512	18	57787559	t	c	0.6808	-0.0394	0.0081	1.251e-06	----+--+--+-+--?-?--+-------	0.6609	38800
rs2797104	1	72891435	a	g	0.1797	-0.0477	0.0098	1.251e-06	----+--+-+-----+--+--+-+----	0.8664	39618.1
rs4290215	11	28647955	t	g	0.3808	-0.0377	0.0078	1.253e-06	------++----+---+-+--+--+-++	0.001331	39617.9
rs6459074	6	55207392	a	g	0.6032	-0.0383	0.0079	1.26e-06	----+---+------+?-+-----++--	0.7944	38160.1
rs7559082	2	24873730	a	g	0.7661	0.0434	0.009	1.261e-06	++++-+---+-+++--+-++-+-+++++	0.4782	39617.9
rs4434991	11	28647156	a	t	0.6192	0.0377	0.0078	1.261e-06	++++++--++++-+++-+-++-++-+--	0.00133	39618
rs17175713	18	57909799	t	c	0.7494	-0.0453	0.0093	1.267e-06	-------+--+-++-???+-+??-?---	0.443	34652
rs73920612	2	25147289	a	g	0.7991	-0.0471	0.0097	1.267e-06	-------+----++--?---+-+-+---	0.06833	38160
rs4351802	11	28646611	a	t	0.3808	-0.0377	0.0078	1.267e-06	------++----+---+-+--+--+-++	0.001328	39618
rs4582964	11	28646575	a	t	0.3808	-0.0377	0.0078	1.268e-06	------++----+---+-+--+--+-++	0.001328	39618
rs61196936	2	24830463	a	g	0.7637	0.0436	0.009	1.269e-06	++++-+---+-+++--+-++-+-+++++	0.2573	39618
rs9382487	6	55203369	c	g	0.6026	-0.0381	0.0079	1.276e-06	----+---+------+?-+-----++--	0.7811	38160
rs11209963	1	72883303	a	g	0.1802	-0.0481	0.0099	1.276e-06	----+--+-+-----?-?+--+-+----	0.805	38692.9
rs4576808	11	28646472	t	c	0.3802	-0.0377	0.0078	1.277e-06	------++----+---+-+--+--+-++	0.00135	39618
rs782214	1	72945128	a	g	0.8204	0.0477	0.0098	1.278e-06	++++-++-+-+++++-++-++-+-++++	0.8643	39618
rs10767737	11	28645819	t	g	0.6192	0.0377	0.0078	1.281e-06	++++++--++++-+++-+-++-++-+--	0.001325	39618
rs11168962	12	49672739	a	t	0.7217	-0.0438	0.0091	1.284e-06	----+-++--+--+--?-+-+-+-----	0.664	38159.9
rs2492971	1	72887188	t	c	0.1797	-0.0476	0.0098	1.291e-06	----+--+-+-----+--+--+-+----	0.8638	39618
rs8055485	16	19750051	a	g	0.8332	0.0498	0.0103	1.295e-06	+++++++-++++--+?+?+++-++-+++	0.2778	38693
rs4268495	11	28645341	c	g	0.3802	-0.0377	0.0078	1.297e-06	------++----+---+-+--+--+-++	0.001345	39618
rs2590942	1	72885281	t	g	0.8203	0.0476	0.0098	1.3e-06	++++-++-+-+++++-++-++-+-++++	0.865	39617.9
rs2940288	4	130918048	t	g	0.3584	0.0382	0.0079	1.303e-06	+-++-+--+-++++++?-+--+++-+-+	0.1542	38266
rs4782278	16	19758962	t	c	0.1668	-0.0498	0.0103	1.304e-06	-------+----++-?-?---+------	0.2752	38693
rs12064340	1	177814388	t	c	0.1929	0.0462	0.0095	1.309e-06	+-+-+++-++++-++++++--+-++--+	0.2093	39618
rs4782272	16	19729016	c	g	0.1687	-0.0506	0.0105	1.31e-06	-------+----++-???---+--+---	0.2141	37235.1
rs74410950	2	25076168	c	g	0.0859	0.0677	0.014	1.319e-06	+++-+++++--+--+-+++++?-+?+++	0.23	38668
rs9951795	18	57777991	c	g	0.6791	-0.0398	0.0082	1.325e-06	----+--+--+-+--?-?--+-------	0.6037	38693
rs61771778	1	72926855	a	g	0.8215	0.0487	0.0101	1.332e-06	++++-++-+-+++++?+?-++?+-?+++	0.7584	37743
rs4780825	16	19745801	a	g	0.8453	0.0537	0.0111	1.334e-06	+++++++-++++?-+-?-+-+-++++++	0.1553	37104
rs12473543	2	25387181	t	g	0.751	0.0439	0.0091	1.337e-06	++++-+-++-+--++++++++?++?+++	0.6502	38668
rs2118404	2	25377329	t	c	0.2699	-0.0419	0.0087	1.338e-06	----+-+--+-++---------------	0.6465	39618
rs4274191	11	28645698	a	g	0.3807	-0.0376	0.0078	1.34e-06	------++----+---+-+--+--+-++	0.001345	39618
rs55687948	16	19747922	t	c	0.8332	0.0498	0.0103	1.342e-06	+++++++-++++--+?+?+++-++-+++	0.2805	38693
rs782242	1	72916574	t	c	0.1802	-0.048	0.0099	1.356e-06	----+--+-+-----?-?+--+-+----	0.8079	38693.1
rs62142303	2	24833314	c	g	0.7713	0.0436	0.009	1.36e-06	++++-+--++-+++--+-++++-+++++	0.4072	39618
rs8044413	16	19719840	t	c	0.1195	-0.0602	0.0125	1.363e-06	---+---+----+-??-?-+-?--?+--	0.9115	35976
rs11030051	11	27589011	a	g	0.1233	0.0567	0.0117	1.363e-06	+-+-++-++++--++--+-+-++++-++	0.05166	39617.9
rs6885976	5	91757742	t	c	0.6322	0.0385	0.008	1.364e-06	++++--+-++++-++-+-+++?++?+++	0.4003	38668
rs28663160	16	19846937	t	c	0.8004	0.0463	0.0096	1.364e-06	+++-+++-++++-+++++++++++++++	0.9792	39618
[truncated: 514 more rows]
