# Supplementary material for: Novel loci for childhood body mass index and shared heritability with adult cardiometabolic traits
Source: PLoS Genet. 2020 Oct 12;16(10):e1008718. doi: 10.1371/journal.pgen.1008718 (PMC7581004; doi:10.1371/journal.pgen.1008718)
Supplement: S5 Table — (XLSX) [file pgen.1008718.s005.xlsx]

## Sheet: S5 Table
	Body fat mass percentage measured by dual-energy X-ray absorptiometry at latest time point between 24-120 months
Study name	Collection method	Reference- collection method, if applicable (PMID)	Sample size included in the analsyis	Mean body fat mass percentage	% males in analysis	Mean age (SD) at body fat mass percentage measurement, months
COPSAC 2000	Lunar iDXA densitometer (GE Healthcare, Fairfield, CT) and were used to determine both the total body fat percentage (calculated as total fat mass divided by body weight on the day of scan, except for the head, because many patients moved their heads during the scan). All DXA scan data were scrutinized by an experienced specialist and analyzed with enCore software (GE-Healthcare)	PMID: 28814549	267	0.2802	0.472	82.4 (8.1)
COPSAC 2010	Lunar iDXA densitometer (GE Healthcare, Fairfield, CT) and were used to determine both the total body fat percentage (calculated as total fat mass divided by body weight on the day of scan, except for the head, because many patients moved their heads during the scan). All DXA scan data were scrutinized by an experienced specialist and analyzed with enCore software (GE-Healthcare)	PMID: 28814549	130	0.2076	0.492	41.7 (3.2)
Generation R	Total fat mass was measured using Dual-energy X-ray absorptiometry (DXA) scanner (iDXA, GE-Lunar, 2008, Madison, WI, USA) and analyzed with the enCORE software v.12.6. Children were placed on the DXA table in supine position without shoes, heavy clothing and metal objects with their hands flat and pronated. We calculated total fat mass (kg) as a percentage of total body weight (kg) measured by DX…	PMID: 21379325	1935	0.2554	0.489	110,79 (14,4)
PANIC	Lunar DXA scans performed at Kuopio University Hospital	PMID: 24325400	366	0.2276	0.522	109,49 (9,32)
